# Supplementary material for: Direct, indirect, and vicarious nature experiences collectively predict preadolescents’ self-reported nature connectedness and conservation behaviors
Source: PeerJ. 2023 Jun 21;11:e15542. doi: 10.7717/peerj.15542 (PMC10290449; doi:10.7717/peerj.15542)
Supplement: Supplemental Information 1 — CC, Cognitive connection with nature; CE, Emotional connection with nature; PE, Pro-environmental behavior; PN, Pro-nature behavior; DE, Direct nature experience; IDE, Indirect nature experience; VE, Vicarious nature experience. [file peerj-11-15542-s001.xlsx]

## Sheet: Sheet1
Number	Gender(1=boy,0=girl)	Age	Residence(1=city,0=rural)	Location	School	CC1	CC2	CC3	CC4	CC5	CC6	EC1	EC2	EC3	EC4	EC5	EC6	EC7	PE1	PE2	PE3	PE4	PE5	PE6	PN1	PN2	PN3	PN4	PN5	PN6	PN7	DE1	DE2	DE3	DE4	DE5	DE6	DE7	DE8	DE9	IDE1	IDE2	IDE3	IDE4	VE1	VE2	VE3	VE4
1	1	9	1	Hangzhou	Shengli	5	5	5	4	5	4	4	3	3	2	2	4	2	3	3	1	2	1	2	1	1	1	2	1	1	1	1	3.75	2	2	2	1	1	1	1	1	2	1	1	4	4.75	1	1
2	0	9	1	Kunming	Lianhua	5	5	4	5	5	5	4	5	4	5	3	5	5	3	4	2	3	2	3	1	1	2	3	1	1	1	1	3	1	2	5	4	3	4	5	5	4	3	3	4	2	1	5
3	1	9	0	Kunming	Erjie	3	4	4	5	4.75	5	3	3	4	3	5	3.5	5	5	5	4	3	2	3	4	3	3	2	2	1	4	1	2	3	1	1	3	1	2	1	3	2	1	4	4	4	4	5
4	0	9	1	Xishuangbanna	Yixiao	4	5	5	3	3	3	3	5	3	3	3	4	4	2	2	2	2	2	2	2	1	1	1	2	1	1	1	4.25	2	2	3	1	1	1	2	1	2	1	2	2	1	1	1
5	0	9	0	Kunming	Erjie	4	4	5	5	4	5	4	5	4	5	2	5	4	4	4	4	3	2	5	5	3	5	5	3	2	5	1	2	1	1	2	3	2	1	1	5	4	1	3	3	1	3	2
6	0	9	1	Hangzhou	Fenghuang	4	4	4	4	4	4	3	3	4	2	3	3	4	2	4	2	3	3	3	1	1	1	1	1	1	1	1	3	3	1	2.25	2	1	1	1	2	2	2	2	2	2	2	2
7	1	9	0	Xishuangbanna	Zhongxin	4	5	5	4	5	5	5	3	2	3	2	2	3	2	3	3	1	3	2	4	1	3	2	1	1	1	1	4	2	4	1	2	4	2	1	1	2	1	1	1	2	1	1
8	1	9	1	Kunming	Yunda	4	5	4	4	4	3	5	3	4	3	5	3	5	3	4	5	3	3	4	3	2	2	1	2	4	3	1	1	4	3	1	3	1	2	5	3	4	3	5	4	3	2	5
9	1	9	1	Hangzhou	Shengli	5	5	5	3	5	5	5	5	3	4	4	2	5	3	4	3	4	3	3	3	2	3	3	3	4	3	1	1	3	3	2	2	2	2	2	3	4	4	4	5	5	4	3
10	1	9	1	Kunming	Wuhua	4	5	4	3	4	5	3	4	4	5	3	4	4	4	3	4	4	3	5	3	3	4	4	3	3	4	1	1	2	1	1	3	1	2	2	2	2.75	3	3.25	3	4	3	2
11	1	9	1	Xishuangbanna	Shiji	4	5	4	4	5	5	3	5	4	5	5	3	3	3	4	2	5	3	4	2	4	4	5	3	3	4	1	4	2	1	2	5	2	3	1	3	3	2	3	3	2	2	4
12	0	9	1	Hangzhou	Fenghuang	5	5	5	4	5	5	4	5	5	5	4	4	5	2	5	2	2	3	2	2	5	2	5	4	1	1	1	5	2	1	3	5	1	4	1	4	4	4	2	4	2	2	2
13	1	9	0	Kunming	Erjie	5	4	5	4	5	4	5	3	4	4	3	4	5	3	2	2	3	3	3	2	1	1	2	4	1	1	1	2	3	1	1	3	1	2	1	1	2	1	1	1	2	3	2
14	1	9	1	Kunming	Wuhua	4	5	5	4.75	3	4	5	5	5	3	5	5	5	3	3	4	5	3	4.5	2.75	3	3	3.75	4	4	5	1	1	1	1	2	1	1	3.25	2	3	4	2	3.75	3	4.25	1	1
15	1	9	0	Xishuangbanna	Zhongxin	4	5	3	5	5	3	4	5	3	4	3.75	4	5	2	3	2	4	3	5	2	5	3	4	4	3	4	1	2	3	2	3	4	5	3	4	5	2	4	3	2	4	3	5
16	1	9	0	Kunming	Erjie	1	5	5	4	5	3	5	5	1	1	1	4	4	2	3	4	5	3.5	4	2.75	4	4	3	5	2	4	1	4	3	1	1	3	2	5	2	2	3	4	3	3	2	4	4
17	1	9	0	Xishuangbanna	Zhongxin	4	2	4.75	3	4	2	5	3	4	2	2	1	3	2	3	3	4	3.75	3	3	2	4	3	3	4	3	1	3	2	3	5	4	3	2	2.5	3	4	3	2	2	4	3	5
18	1	9	1	Hangzhou	Fenghuang	3	5	5	1	1	3	2	4	2	3	1	2	1	2	4	1	2	4	1	1	1	1	1	1	1	1	1	1	3	1	3	1	2	1	1	1	1	1	1	3	1	1	3
19	0	9	1	Kunming	Yunda	5	5	5	5	5	5	5	5	5	4	5	4	5	2	3	3	3	4	2	1	1	1	1	1	1	1	1	3	4	3	1	5	1.5	2	3	3	2	1	1	2	5	3	1
20	1	9	1	Kunming	Yunda	2	4	5	3	4	4	3	2	3	4	2	3.5	4	2	2	3	2	4	4	1	1	1	2	1	1	1	1	2	3	1	1	1	1	2	1	3	3	2	2	2	2	1	2
21	0	9	1	Hangzhou	Shengli	4	4	4	4	4	4	3	4	4	4	4	2	3	2	3	3	3	4	3	2	2	3	5	2	3	3	1	2	2	1	1	3	2	1	1	2	2	2	2	3	2	3	2
22	0	9	0	Kunming	Erjie	4	5	5	4	4	5	4	5	4	5	5	4	4	4	4	4	5	4	4	4	3	2	2	2	1	1	1	2	3	1	3	4	1	3	2	4	2	2	2	3	3	3	3
23	0	9	0	Kunming	Erjie	4	5	4	3	4	4	2	4	4	3	4	2	3	4	3	3	4	4	4	3	2	3	1	2	1	1	1	3	3	1	2	4	1	3	3	3	2	2	2	3	2	3	4
24	1	9	1	Kunming	Lianhua	4	4	5	4	3	3	5	3	4	1	2	4	2	4	4	4	5	4	3	3.25	3	4	4	2	1	1	1	5	3	4	3	2	1	3	1	3	4	3	2	3	4	5	3
25	0	9	1	Xishuangbanna	Shiji	5	5	5	5	5	5	5	5	5	5	5	5	4	4	5	3	5	4	5	3.5	2.75	2	3	2	1	1	1	2	1	1	3	5	5	5	2	3	3	3	3	5	5	5	5
26	0	9	1	Hangzhou	Shengli	5	1	5	5	5	5	5	5	5	5	5	5	5	3	2	2	2	4	2	3	2	2	2	3	3	3	1	2	1	1	2	3	1	2	1	3	2	2.5	2	2	3	2	1
27	0	9	0	Kunming	Erjie	5	4	5	5	4	3	4	4	5	3	4	3	5	2	5	2	3	4	2	1	1	1	2	3	1	1	1	2	1	1	4	1	2	1	2	1	1	1	1	3	2	2	1
28	0	9	0	Kunming	Erjie	4	5	5	4	5	5	3	5	4	5	5	2	4	3	4	4	4	4	5	3	5	5	4	3	4	3	1	4	3	1	1	4	5	2	1	2	2	1	5	4	3	5	2
29	1	9	1	Kunming	Lianhua	5	4	4	5	5	5	5	4	4	3	4	3	5	4	4	4	3	4	3.75	2	2	4	3.25	3	2	3	1	3	4	3	1	3	1	2	1	4.75	3	3	3	2	4	2	4
30	1	9	1	Kunming	Yunda	5	5	5	5	5	4	4	4	2	5	4	5	3	4	5	3	3	4	4	2	4	3	4	3	2	2	1	2	4	1	2	3	1	4	1	3	2	4	5	4	3	2	4
31	0	9	1	Kunming	Wuhua	4	4	5	4	4	4	4	4	4	4	4	3	4	3	4	3	3	4	3	3	3	3	3	3	3	3	1	4	4	2	1	3	1	3	1	3	4	3	3	2	2	3	2
32	1	9	1	Kunming	Lianhua	4	5	5	4	4	5	4	5	3	5	5	1	3	4	3	3	5	4	3	2	2	4	4	3	2	2	1	4	1	1	5	5	1	4	2	2	2	2	2	5	4	3	5
33	1	9	1	Kunming	Yunda	4	5	5	5	5	5	5	5	4	4	5	4	4	3	5	3	5	4	5	3	5	5	5	3	1	2	1	5	5	1	1	4	1	3	2	5	5	5	5	4	5	4	5
34	1	9	1	Xishuangbanna	Shiji	4	5	5	5	5	5	5	4	4	4	3	4	5	4	5	4	4	4	5	4	3	4	4	3	4	4	1	4	5	1	5	4	1	4	2	4	4	3	4	4	5	5	4
35	0	9	1	Kunming	Wuhua	5	5	5	4	5	4	4	4	5	4	5	5	5	4	4	5	3	4	3	4	3	3	5	4	5	2	1	2	4	1	3	5	5	3	3	5	4	2	4	3.25	5	5	5
36	0	9	1	Kunming	Wuhua	5	5	5	1	5	5	5	5	5	5	5	5	5	4	4	4	4	4	4	4	3	4	4.75	4	4	4	1	4	4	4	2	4	4	4	4	4	4	4	4	4	4	4	1
37	0	9	0	Xishuangbanna	Zhongxin	4	5	5	5	5	5	4	5	5	4	5	4	5	4	5	4	3	4	3	5	1	4	5	4	2	1	1	5	3	2	3	5	2	1	5	5	5	4	4	5	4	5	4
38	1	9	0	Xishuangbanna	Zhongxin	5	5	5	5	4	4	5	4	4	5	5	4	4	4	4	3	3	4	4	4	3	4	3	4	3	3	1	5	2	1	3	5	2	4	1	3	4	3	2	2	4	4	3
39	1	9	1	Xishuangbanna	Shiji	4	4	5	4	4	4	5	4	4	5	4	5	4	4	4	4	3	4	5	5	5	4	4	4	3	3	1	3	4	1	2	2	1	4	1	4	4	4	4	3	4	3	3
40	0	9	1	Kunming	Yunda	4	4	5	5	5	5	5	5	5	5	5	5	5	4	4	4	5	4	4	5	4	5	4	5	3	3	1	5	5	2	3	5	2	3.5	1	5	5	5	5	5	5	5	5
41	0	9	1	Kunming	Yunda	5	5	5	5	5	5	5	3	5	3	5	5	5	4	3	2	5	4	5	2	1	1	5	5	2	5	1	5	1	1	1	5	5	5	5	5	5	5	5	5	5	5	5
42	0	9	1	Kunming	Lianhua	5	5	5	5	5	5	5	5	5	5	5	1	3	5	5	4	5	4	3	2	1	4	4	5	4	3	1	4	4	1	1	5	1	4	1	3	4	2	3	4	4	3	4
43	0	9	1	Kunming	Wuhua	5	5	5	5	5	5	5	4	5	5	4	4	5	4	4	3	4	4	4	3	3	4	5	5	3	5	1	4	4	1	3	3	2	4	2	4	5	4	5	4	4	5	4
44	1	9	1	Kunming	Yunda	5	5	5	5	5	5	5	5	5	5	5	5	5	3	4	4	2	4	4	2	1	1	5	5	3	5	1	5	5	5	5	5	5	1	2	4	2	2	2	5	3	2	2
45	1	9	1	Kunming	Yunda	5	5	5	5	5	5	5	5	4	5	4	3	5	5	5	4	5	4	5	3	3	4	5	5	3	3	1	5	5	1	3	3	2	5	1	5	5	5	5	5	5	5	3
46	0	9	0	Xishuangbanna	Changle	3	5	5	5	4	5	5	5	4	3	4	3	5	5	4	3	5	4	5	5	5	4	5	5	5	5	1	5	1	1	3	5	1	2	1	1	1	1	3.75	3	1	5	1
47	0	9	0	Xishuangbanna	Zhongxin	4	5	5	5	5	5	5	5	5	5	5	1	5	5	5	5	5	4	4	4	5	5	5	5	4	5	1	5	4	1	2	5	1	4	1	5	5	4	4	5	5	5	5
48	0	9	1	Xishuangbanna	Shiji	5	5	5	5	5	5	5	5	5	5	5	5	5	4	4	4	4	4	5	2.75	3	5	5	5	3	3	1	5	5	1	2	5	2	5	1	5	5	4	4	5	4	5	5
49	1	9	1	Xishuangbanna	Shiji	5	4	5	5	4	5	5	4	3	5	4	5	5	1	4	5	3	4.5	4	1	1	5	2	1	2	1	1	2	3	1	5	1	1	1	1	1	4	1	1	4	4	5	4
50	0	9	0	Kunming	Erjie	3	1	4.75	3	3	4	3.25	4	5	3	4	4	5	3	2	4	3.5	4.5	3	1	2	2	1	2	1	1	1	2	1	2	1	3	3	2	2	3.75	3	2	1	5	1	1	3
51	0	9	0	Xishuangbanna	Erxiao	5	5	5	5	3	4	1	5	2	5	5	4	3	3	4	5	4	4.5	5	2	2	3	3.75	2	2	3	1	3	2	3	1	2	1	5	5	2	3	2	1	3	4	5	2
52	1	9	1	Hangzhou	Fenghuang	5	5	5	4.25	5	4	4	5	5	4	3	3	5	3	5	2	3	4.75	4	2	5	1	1	1	1	2	1	1	4	4	1	2	1	3	2	3	3	3	3	2	2	1	3
53	1	9	1	Hangzhou	Shengli	5	5	5	5	5	5	4	4	3	3	5	2	5	3	3	1	3	5	4	1	2	3	3	1	1	1	1	2	2	1	1	3	1	4	2	2	2	2	2	2	3	2	2
54	1	9	1	Hangzhou	Fenghuang	4	5	5	4	3	4	3	3	3	2	5	5	5	3	4	3	4	5	3	3	4	2	3	1	1	1	1	4	5	3	2	5	2	5	2	5	5	5	5	5	5	4	5
55	1	9	1	Hangzhou	Fenghuang	4	4	5	3	4	3	5	5	5	5	4	3	4	3	4	2	5	5	3	2	1	2	5	1	1	1	1	5	4	1	1	3	1	2	1	2	1	2	1	3	3	3	4
56	1	9	0	Kunming	Zhugou	5	5	5	4.75	4	3	4	3	4	4	4.5	3	4	3	4	2	4	5	4	2	1	1	1	1	1	1	1	3	4	4	3	3	4	2	1	1	1	1	1	2	2	1	1
57	0	9	1	Kunming	Lianhua	5	5	5	4.75	4	4	5	4	3	4	5	5	4	4	5	1	5	5	4	2	1	3	3	1	1	1	1	3	3	2	3	4	1	3	2	3	3	2	3	3	4	4	4
58	0	9	1	Kunming	Lianhua	5	4	5	5	5	5	5	3	4	4	5	5	5	3	4	2	1	5	3	1	1	3	5	1	3.25	1	1	1	5	2	3	5	1	5	1	5	5	5	5	5	5	5	1
59	0	9	1	Kunming	Yunda	5	5	5	5	5	5	5	5	5	5	5	5	5	3	3	5	5	5	5	5	5	3	1	1	5	5	1	5	5	2	4	5	2	1	1	5	5	5	5	5	4	4	5
60	1	9	1	Kunming	Wuhua	5	5	4	5	4	4	4.75	5	3	5	4	3	5	3	4	4	5	5	5	3	2	2	3	1	1	2	1	3	4	1	2	5	1	3	2	5	5	5	5	4	5	5	5
61	0	9	0	Xishuangbanna	Zhongxin	5	5	5	5	5	5	5	4	5	3	3	3	5	3	4	1	4	5	4	2	1	2	2	1	1	1	1	2	2	1	4	3	1	2	1	2	3	2	2	2	3	3	3
62	1	9	0	Xishuangbanna	Zhongxin	5	5	5	5	5	3	5	2	2	5	5	3	3	2.75	3.75	2	5	5	3	1	1	1	4	1	1	1	1	2	1	1	5	5	1	5	1	5	5	5	5	2	3	5	2
63	0	9	1	Xishuangbanna	Shiji	5	5	5	5	5	5	5	5	5	5	1	1	3	3	5	2	5	5	4	5	2	5	2	1	1	1	1	4	3	1	3	5	1	5	1	2	2	2	2	4	4	5	5
64	0	9	0	Hangzhou	Nanshan	5	5	5	3	5	5	5	5	5	3	4	3	3	3	4	3	5	5	3	2	2	3	2	2	2	2	1	4	4	1	5	2	1	3	1	3	3	3	3	5	5	5	5
65	1	9	1	Hangzhou	Shengli	5	3	5	5	5	5	5	5	5	5	1	2	5	5	5	5	5	5	5	2	2	1	5	2	2	5	1	5	5	1	2	1	1	5	1	5	2	4	1	5	5	2	5
66	1	9	1	Hangzhou	Shengli	5	5	5	5	5	5	5	5	5	5	5	1	5	5	5	5	3	5	5	3	2	5	5	2	1	1	1	5	2	1	2	5	1	5	1	5	5	1	2	5	5	2	5
67	0	9	0	Kunming	Erjie	3	4	5	5	5	5	5	5	5	4	4	3	5	4	5	4	5	5	5	4	4	5	2	2	5	3	1	3	2	1	2	4	1	5	2	5	1.25	2	1	3	2	5	2
68	1	9	0	Kunming	Zhugou	2	5	5	4	4	4	1	5	2	2	4	4	5	2	5	5	4	5	5	4	3	5	5	2	5	5	1	5	2	1	3	1	1	3	1	2	2	1	1	2	2	3	1
69	0	9	1	Kunming	Wuhua	5	5	5	5	5	5	5	5	5	5	4	1	5	5	5	5	4	5	5	2	1	4	5	2	1	1	1	5	5	1	4	5	1	3	1	3.75	5	5	5	5	5	5	5
70	1	9	1	Kunming	Yunda	3	2	4	5	5	5	4	4	4	4	4	5	5	3	4	3	3	5	5	3	5	5	3.5	2	5	5	1	3	2	1	3	2	1	2	1	4	3	3	2	2	4	2	2
71	1	9	1	Kunming	Yunda	5	5	5	5	5	5	5	5	5	5	5	5	5	3	5	3	3	5	2	2	2	4.25	4.5	2	2	2	1	3	4	1	2	2	2	3	2	3	3	4	5	5	2	3	5
72	0	9	0	Xishuangbanna	Erxiao	4	5	5	3	4	4	4	4	4	3	4	4	4	3	4	2	3	5	3	2	2	3	2	2	2	2.5	1	3	3	1	2	2	1	3	4	2	2	1	1	3	2	2	3
73	0	9	0	Xishuangbanna	Erxiao	3	4	5	3	5	4	4	3	4	3	4	3	4	3	5	2	3	5	3	3	2	4	2	2	1	1	1	2	1	1	4	3	4	2	3	4	2	3	2	2	4	1	5
74	0	9	1	Xishuangbanna	Shiji	5	4	4	5	5	5	3	5	5	5	4	3	5	4	5	3	4	5	5	3	1	3.75	2	2	1	1	1	3	3	2	2	3	4	2	2	3	3	2	2	3	4	2	2
75	0	9	1	Xishuangbanna	Shiji	4	5	5	5	5	4	5	4	5	4	4	4.75	4	5	5	3	5	5	5	5	3	3	5	2	3	3	1	3	2	1.5	3	4	1	4	1	3	3	3	3	4	4	4	3
76	0	9	1	Xishuangbanna	Shiji	5	1	5	1	5	1	4	4.25	3	5	3	5	5	3	5	4	5	5	5	5	3	5	3	2	2	2	1	3	2	1	2	3	1	3	1	1	5	5	5	5	5	5	5
77	1	9	1	Hangzhou	Fenghuang	5	4	5	4	5	5	4	4	4	5	4	3	5	4	5	4	3	5	3	3	2	5	5	3	3	1	1	4	5	2	1	2	1	3	2	2	2	2	2	4	4	3	3
78	0	9	1	Kunming	Lianhua	5	5	5	3	5	5	5	5	5	5	5	3	5	3	4	2	3	5	4	5	2	4	4	3	3	2	1	4	3	1	3	2	1	5	1	4.25	3	3	2	3	3	2	1
79	0	9	1	Kunming	Lianhua	4	5	5	5	5	5	5	4	4	4	5	4	5	3	4	3	5	5	5	4	3	4	5	3	4	4	1	3	5	1	2	5	1	4	1	4	3	3	4	5	5	4	3
80	0	9	1	Kunming	Lianhua	4	5	5	5	5	5	5	5	4	4	5	1	5	5	3	5	2	5	5	1	2	4	5	3	1	4	1	4	4	1	2	5	2	3	1	2	3	2	1	5	5	5	4
81	0	9	1	Kunming	Yunda	5	5	5	5	5	5	5	5	5	5	5	5	5	4	5	3	4	5	5	3	2	4	5	3	1	1	1	4	5	2	2	5	1	5	1	5	5	5	5	5	5	5	1
82	1	9	1	Kunming	Lianhua	5	5	5	5	5	5	4	3	5	4	5	3	5	5	5	4	5	5	3	5	5	5	3	3	3	3	1	5	1	1	3	3	2	5	1	4	4	4	4	3	5	5	5
83	0	9	1	Kunming	Lianhua	5	5	5	5	5	5	3	5	4	4	1	2	4	3	5	3	3	5	3	3	3	2	2	3	2	3	1	3	1	1	3	1	1	4	1	5	5	5	4	3	4	3	4
84	1	9	1	Kunming	Yunda	5	5	5	5	5	4	4	4	5	4	5	5	5	3	3	3	5	5	4.75	2	1	2	2	3	2	2	1	2	2	2	2	3	1	3	2	5	5	4	5	4	5	3	2
85	0	9	0	Xishuangbanna	Changle	1	3	5	3	3	5	4	4	5	3	4	1	4	2	3	1	4	5	4	1	1	3	1	3	2	5	1	2	3	1	4	2	1	2	3	1	1	1	2	2	5	5	1
86	1	9	1	Xishuangbanna	Shiji	5	4	5	5	5	5	5	5	4	5	5	4	4	4	5	4	5	5	4	5	5	4	4	3	4	4	1	5	4	1	2	3.75	3.5	5	2	5	5	5	5	4	4	4	4
87	1	9	1	Xishuangbanna	Yixiao	5	5	5	4	5	5	5	4	4	4	5	4	5	5	5	5	4	5	5	3	4	5	4	3	3	4	1	5	2	1	1	4	1	4	1	5	4	5	5	4	4	3	5
88	0	9	1	Hangzhou	Shengli	5	5	5	5	5	5	5	4	5	3	5	2	5	3	4	3	4	5	3	3	4	2	3	3.25	1	1	1	3	3	1	3	2	1	2	1	3	3	3	3	3	3	3	3
89	0	9	0	Kunming	Zhugou	1	5	5	5	5	5	3	4.25	2	5	5	3.25	5	5	5	5	5	5	2	5	5	3	1	4	2	1	1	4	3	5	3	3.25	3	4	2	1	5	5	5	5	5	3	5
90	0	9	1	Kunming	Lianhua	5	5	5	5	4.5	5	5	5	5	5	3	4	5	5	5	5	4	5	5	5	5	4	4	4	5	5	1	5	5	1	2	5	5	4.25	3	5	5	5	5	3	5	5	4
91	0	9	1	Kunming	Yunda	5	5	4	4	4.5	5	5	4	5	2	1	5	5	3	4	4	2	5	3	1	1	3	4	4	1	1	1	2	3	3	3	1	1	1	1	3	2	2	2	3.25	1	1	1
92	0	9	1	Kunming	Yunda	5	5	5	4	5	5	5	5	5	4	4	3	5	3	3	4	4	5	4	2	2	4	4	4	4	4	1	4	2	1	1	4	2	2	2	3	3	3	3	4	3	3	4
93	1	9	1	Kunming	Lianhua	5	5	5	5	5	5	5	5	4	5	5	3	5	3	5	2	5	5	5	2	2	5	3	4	2	3	1	3	3	2	4	4	1	3	1	4	4	5	5	4	3	2	5
94	1	9	1	Kunming	Lianhua	5	5	5	5	5	5	5	5	5	5	5	2	3	4	4	2	5	5	3	2	3	3	3	4	2	2	1	4	5	1	1	4	3	3	2	4.25	4	3	4	3	4	4	5
95	1	9	1	Kunming	Lianhua	5	5	5	5	5	5	5	5	4	5	5	4	5	4	4	4	5	5	5	1	1	3	4	4	1	5	1	5	5	3	5	4	3	2	5	5	5	5	4	4	4	5	5
96	1	9	1	Kunming	Wuhua	5	5	5	5	5	5	5	5	5	4.25	4	1	5	5	4	3	5	5	4	3	4	3	4	4	3	4	1	3	3	1	3	3	1	3	1	3	3	3	3	3.75	4	4	4
97	1	9	1	Kunming	Wuhua	5	5	5	4.75	5	5	4	4	5	4	4	1	5	3	5	4	5	5	5	2	5	4	2	4	2	4	1	3	1	1	1	1	1	5	4	4	5	4	3	5	5	4	2
98	0	9	0	Xishuangbanna	Changle	4	5	5	3	5	4	4	4	5	4	4	1	5	2	5	5	4	5	5	4	5	3	5	4	4	4	1	5	3	2	2	5	1	5	4	3	5	4	3	5	3	4	5
99	1	9	0	Xishuangbanna	Erxiao	5	5	5	5	4	5	4	3	3	3	4	4	5	3	3	3	4	5	4	4	4	4	4	4	2	2	1	3	3	1	2	3.25	2.25	4	2	2	2	2	1	3	2	1	3
100	1	9	1	Xishuangbanna	Shiji	5	5	5	4	5	3	4	4	4	4	5	2	3	4	4	5	4	5	4	4	3	4	4	4	4	4	1	4	2	1	4	3	2	4	1	4	4	4	4	4	4	4	4
101	1	9	1	Xishuangbanna	Yixiao	5	5	5	5	5	5	5	5	5	5	5	5	5	5	5	5	5	5	5	4	4	5	5	4	5	4	1	5	5	1	3	5	2	5	4	4	5	5	4	5	5	5	5
102	0	9	1	Hangzhou	Shengli	5	5	5	5	5	5	5	5	5	5	5	5	5	4	5	5	5	5	5	5	4	5	5	5	2	2	1	5	5	1	2	2	1	3.25	1	3	3	4	4	5	5	5	5
103	0	9	1	Hangzhou	Shengli	5	1	5	5	5	5	5	5	5	5	1	1	5	5	5	5	5	5	5	5	5	5	5	5	5	5	1	5	5	1	1	4.75	1.25	5	1.25	5	5	5	5	5	5	5	5
104	0	9	1	Hangzhou	Shengli	5	5	5	5	5	5	5	5	5	5	5	5	5	5	5	5	5	5	5	5	5	5	5	5	5	5	1	5	5	1	1	5	1	5	1	5	5	5	5	5	5	5	5
105	0	9	1	Hangzhou	Fenghuang	5	5	5	5	5	5	5	5	5	5	5	5	5	4	2	1	5	5	1	4	3	4	4	5	3	4	1	5	5	4	3	5	1	5	1	5	5	5	5	5	5	5	5
106	0	9	1	Hangzhou	Fenghuang	5	5	5	5	5	5	5	5	5	5	5	5	5	5	5	5	5	5	5	5	5	5	5	5	5	5	1	5	5	1	1	5	5	5	3	5	5	5	5	5	5	5	5
107	1	9	1	Hangzhou	Shengli	5	5	5	5	5	5	5	5	5	5	5	5	5	5	5	5	5	5	5	5	5	5	5	5	3	4	1	5	5	1	3	5	1	5	5	5	5	5	5	5	5	5	4
108	1	9	1	Hangzhou	Shengli	5	5	5	5	5	5	5	5	5	5	5	5	5	5	5	5	5	5	5	4	5	5	5	5	5	5	1	3	2	1	2	3	1	5	1	4	5	5	5	5	5	5	5
109	1	9	1	Hangzhou	Fenghuang	5	5	5	1	1	1	5	5	5	5	1	1	1	5	5	5	4	5	5	5	5	5	5	5	1.25	2.5	1	1	2	1	2	1	1	5	1	3	2	3	3	5	5	5	4
110	0	9	0	Kunming	Erjie	5	5	5	5	5	5	5	5	5	5	5	2	5	4	5	3	2	5	5	1	3	4	2	5	1	3	1	4	3	1	3	5	2	4	2	4	2	3	1	4	5	1	3
111	0	9	1	Kunming	Lianhua	5	4.25	4	5	4	5	5	4	4	3.75	5	3	4	2	2	2	5	5	3.75	3	2	5	5	5	4	4	1	5	3	1	2	5	5	5	1	5	5	1	3	4	3.75	5	5
112	0	9	1	Kunming	Lianhua	5	5	5	3	5	5	5	5	5	5	5	5	5	2	5	2	5	5	4	3	3	1	1	5	1	1	1	4	1	1	4	2	1	3	1	5	1	1	2	1	1	1	1
113	0	9	1	Kunming	Wuhua	5	5	5	5	5	5	5	5	5	5	5	4	4	4	4	5	5	5	4	5	3	5	5	5	3	4	1	5	5	1	2	5	4	5	1	5	5	5	5	5	5	5	5
114	1	9	1	Kunming	Wuhua	5	3	5	5	5	5	5	5	4	5	4	5	5	5	5	5	5	5	5	5	5	5	5	5	5	5	1	5	1	1	1	1	5	5	1	1	1	1	1	5	5	5	5
115	1	9	1	Kunming	Wuhua	5	5	5	5	5	5	5	5	5	5	5	5	5	4	5	4	5	5	5	4	2	5	5	5	3	3	1	5	5	1	3	4	1	5	1	5	5	4	5	5	5	5	5
116	1	9	1	Kunming	Yunda	5	5	5	5	5	5	5	5	5	5	5	5	5	5	5	5	5	5	5	5	4	5	4	5	5	5	1	5	4	1	5	5	1	5	1	5	5	5	5	5	5	5	5
117	0	9	1	Kunming	Lianhua	4	5	5	5	4	4	5	4	5	5	5	3	5	5	5	4	5	5	4	3	4	5	5	5	2	1	1	5	4	1	4	3	2	5	3	5	5	5	5	5	3.75	3.75	3
118	0	9	1	Kunming	Yunda	5	5	5	3	3	5	5	5	5	5	5	5	1	2	5	1	5	5	5	1	1	1	5	5	1	1	1	2	1	1	1	5	1	1	1	2	2	2	2	5	1	1	1
119	0	9	1	Kunming	Yunda	5	5	5	5	5	5	5	5	5	5	4	5	4	5	4	5	4	5	4	2	3	1	5	5	2	2	1	5	5	1	2	2	2	2	1	5	5	5	5	5	5	5	2
120	0	9	1	Kunming	Yunda	5	5	5	5	5	5	5	5	5	5	5	5	5	5	5	4	5	5	5	5	5	5	5	5	5	5	1	5	5	1	3	5	1	5	2	2	5	4	3	5	5	5	5
121	1	9	1	Kunming	Lianhua	5	5	5	5	5	5	5	5	4	5	5	4	5	5	5	5	5	5	5	5	4	5	5	5	3	3	1	5	2	1	2	5	2	5	1	5	5	5	5	5	5	5	5
122	1	9	1	Kunming	Wuhua	5	1	5	5	5	5	5	5	5	5	5	1	5	5	5	4	5	5	5	4	5	5	5	5	5	5	1	5	5	1	1	5	1	5	1	5	5	5	5	5	5	5	5
123	1	9	1	Kunming	Yunda	5	5	5	5	5	5	5	5	5	5	5	5	5	4	5	5	5	5	5	5	1	5	5	5	1	1	1	5	5	1	2	5	1	5	1	5	5	5	5	5	5	5	5
124	1	9	1	Kunming	Yunda	5	5	5	5	5	4	5	4	3	5	5	4	5	4	5	4	5	5	4	4	3	3	4	5	3	3	1	5	5	2	3	5	1	4	3	5	5	5	5	4	5	5	5
125	0	9	0	Xishuangbanna	Erxiao	5	2	5	5	5	5	5	5	5	5	5	3	5	5	5	5	5	5	5	4	4	5	5	5	4	5	1	5	5	1	2	5	2	5	5	5	5	5	5	5	5	3	4
126	0	9	0	Xishuangbanna	Erxiao	5	1	5	5	5	5	5	5	5	5	5	4	5	5	5	5	4	5	1	4	4	5	4	5	4	4	1	5	5	1	1	5	3	4	1	4	5	5	5	5	5	5	3
127	1	9	0	Xishuangbanna	Zhongxin	5	4	4	4	5	5	5	5	5	3	5	2	4	4	5	3	4	5	4	5	4	5	4	5	3	4	1	4	1	1	1	3	2	5	3	4	4	3	2	5	5	3	2
128	0	9	1	Xishuangbanna	Yixiao	4	2	4	5	4	5	5	5	5	4	4	5	5	4	5	5	5	5	5	3	5	4	5	5	2	5	1	5	4	1	4	5	1	5	1	5	4	4	5	5	5	5	5
129	0	9	1	Xishuangbanna	Yixiao	5	5	5	5	5	5	5	5	5	5	5	5	5	5	5	5	5	5	5	5	5	5	5	5	1	2	1	5	1	1	2	5	1	5	1	5	5	5	5	5	5	5	5
130	0	9	1	Kunming	Yunda	5	4	4	5	4	5	3	3	4	2	4	3	3	3	3	2	3	3	3	2	1	2	5	2	1	1	1.5	2	3	2.25	4	4	1	3	1	4	3	3	2	3	2	1	5
131	0	9	0	Xishuangbanna	Erxiao	4	4	4	4	5	4	4	5	5	4	3	4	4	4	4	4	3	4	5	3	4	3	4	3	4	4	1.5	4	3	1.75	4	3	4	3.5	3	3	3.25	5	3	4	3	4	5
132	1	9	1	Kunming	Lianhua	5	5	5	4	5	4	2	3	4	2	4	5	5	3	3	2	4	5	3	5	3	5	5	2	1	1	1.75	4	4	3	2	2	5	5	5	5	5	5	1	4	5	1	1
133	1	9	1	Kunming	Lianhua	4	3	4.75	4	3	5	5	3	3	4	2	1	5	1	2	4	5	2	2	5	4	2	3.25	1	5	1	2	4	4	4	1	4	5	3	1	4.75	1	2	4.5	1	2	4	2
134	0	9	0	Xishuangbanna	Changle	3	4	4	1	3	3	2	3	1	1	3	3	3	1	2	1	1	2	2	1	1	1	1	1	1	1	2	2	1	2	2	2	3	1	2	2	2	2	2	3	3	2	3
135	0	9	0	Kunming	Zhugou	4	4	5	1	1	4	3	3	5	5	3	3	4	3	3	3	4	2	4	2	1	3	1	2	2	3	2	3	1	1	2	3	2	3	2	3	3	4	2	4	2	3	2
136	0	9	0	Xishuangbanna	Zhongxin	4	2	5	4	5	4	5	3	4	3	5	4	3	3	4	2	4	2	4	4	3	2	3	2	3	4	2	4	3	2	1	5	2	2	3	2	3	4	2	2	4	5	3
137	1	9	0	Hangzhou	Nanshan	5	5	5	3	5	3	3	3	3	4	5	4	3	3	4	3	4	2	4	2	1	2	2	3	1	1	2	2	4	2	1	2	1	2	2	4	1	2	3	3	2	2	4
138	0	9	0	Xishuangbanna	Zhongxin	4	5	5	4	5	3	5	4	5	3	5	2	4	3	2	5	4	2	3	1	3	5	2	4	4	5	2	4	4	1	2	4.25	1	3	4	5	2	2	4	5	5	2	3
139	0	9	0	Kunming	Erjie	5	3	4	4	5	5	5	5	4	5	4	3	3	3	4	3	2	3	5	4	2	3	5	1	3	4	2	4	3	1	1	2	1	3	1	2	2	2	3	4	2	3	4
140	1	9	1	Kunming	Lianhua	5	5	5	5	5	5	5	5	5	3	5	5	5	1	3	2	2	3	2	1	1	1	1	1	1	1	2	2	3	1	3	5	1	3	2.75	4	2	5	5	3	1	1	1
141	1	9	0	Xishuangbanna	Changle	3	2	5	4	3	4	5	5	3	3	3	3	3	2	4	2	2	3	2	2	2	3	2	1	1	1	2	1	2	2	1	2	2	2	3	1	3	1	1	2	2	2	1
142	1	9	0	Xishuangbanna	Changle	4	2	5	4	3	4	3	4	1	3	2	1	2	2	3	5	2	3	3	5	1	3	2	1	3	1	2	2	2	2	5	1	3	1	3	5	1	4	3	2	4	2	5
143	1	9	0	Xishuangbanna	Zhongxin	4	4	4	3	5	3	3	4	3	2	3	3	4	2	2	2	2	3	3	1	1	2	1	1	1	1	2	2	1	1	3	2	1	3	2	1	2	1	1	1	2	1	3
144	1	9	0	Xishuangbanna	Erxiao	3	5	4	4	4.75	2	5	5	4	4	5	2	5	2	2	1	2	3	2	2	3	2	1	1	1	2	2	2	1	1	1	2	2	2	2	1	1	1	2	2	4.25	1	2
145	0	9	1	Hangzhou	Shengli	5	5	5	5	5	5	5	5	5	5	5	5	5	3	5	3	5	3	5	2	1	1	5	2	1	2	2	3	4	1	2	5	1	5	1	5	5	5	5	2	2	2	5
146	0	9	1	Hangzhou	Shengli	5	4	5	5	5	5	5	5	5	5	5	5	5	4	4	3	4	3	3	3	4	4	3	2	1	5	2	4	4	2	3	4	1	5	1	2	2	2	2	5	5	5	2
147	1	9	0	Kunming	Erjie	4	4	4	5	5	5	4	4	3	4	5	3	5	3	4	3	3	3	3	4	5	2	2	2	1	2	2	2	3	1	3	2	3	5	3	3	2	2	2	3	4	4	3
148	0	9	1	Kunming	Wuhua	3	5	5	4	4	4	4	3	3	2	5	3	3	2	3	4	5	3	3	1	1	2	3	2	3	2	2	3	1	2	3	3	4	2	2	3	3.75	4	3	3	2	2	5
149	0	9	0	Xishuangbanna	Zhongxin	4	3	5	2	4	4	5	4	3	3	3	4	3	2	5	2	5	3	4	2	2	1	2	2	2	3	2	4	3	2	2	2	1	1	4	2	2	1	1	2	2	2	2
150	1	9	0	Xishuangbanna	Erxiao	4	5	5	4	5	4	4	4	3	5	3	4	5	3	4	4	3	3	2	4	5	4	3	2.75	3	5	2	4	2	2	2	1	2	3	1	1	2	3	2	3	3	2	3
151	0	9	1	Kunming	Lianhua	4	5	5	4	4	4	4	5	4	4	4	3	4	2	3	3	2	3	4	3	3	4	4	3	3	1	2	2	3	3	1	4	2	3	2	3	3	3	3	3	2	2	2
152	0	9	0	Xishuangbanna	Zhongxin	4	4	5	4	5	5	5	5	4	4	5	3	4	3	5	3	4	3	4	3	4	4	3	3	4	3	2	3	3	2	2	4	2	3	5	3	5	4	3	4	3	4	5
153	1	9	1	Kunming	Lianhua	4	5	4	3	3	3	4	5	5	3	5	5	4	4	4	4	3	3	4	1.75	2	3	3	4	1	1	2	4	2	2	3	4	1	5	1	2	2	2	2	3	1	2	4
154	1	9	1	Kunming	Lianhua	5	4	5	5	3	4	5	3	5	3	5	2	5	3	4	4	4.5	3	4	5	5	3	1	5	2	3	2	5	5	2	3	5	1	4	4	5	5	5	5	3	3	1	3
155	1	9	1	Kunming	Lianhua	4	5	4	5	4	4	5	4	5	4	3	3	5	3	5	2	4	3	5	3	2	4	4	5	2	1	2	1	5	2	2	2	1	2	1	5	5	5	2.75	2.25	4	3	5
156	0	9	0	Xishuangbanna	Zhongxin	4	4	4	3	5	5	5	5	4	5	4	3	4	3	4	4	4	3	5	3	3	4.25	5	5	2	2	2	3	3	1	4	3	2	3	2	4	4	3	3	4	3	4	3
157	1	9	1	Kunming	Lianhua	5	5	5	4.5	5	4.25	4	4	4	4	3	1	4	3	4	2	4	3.75	4	1	2	2	3	5	1	1	2	4	4.25	2	2	4	1	3	1	5	4	3.75	2.75	1	3	2	4
158	1	9	1	Hangzhou	Fenghuang	4	5	5	3	3	1	5	3	4	1	3	4	3	3	4	1	3.25	4	3	3	1	1	1	1	1	1	2	2	3	1	1	3	1	2	1	2	1	1	2	3	1	1	2
159	0	9	1	Kunming	Lianhua	4	5	3	5	5	5	5	4	4	5	3	4	5	4	3	5	2	4	4	4	2	4	3	1	5	5	2	2	3	3	2	3	3	3	3	5	2	3	3	2	4	4	1
160	1	9	1	Kunming	Lianhua	4	5	5	5	5	5	4	5	5	5	5	2	3	3	5	2	2	4	5	3	1	2	2	1	2	1	2	1	5	1	3	2	1	3	1	5	4.25	5	1	1	5	2	5
161	1	9	0	Xishuangbanna	Changle	3	3	5	3	4	4	4	5	3	2	1	1	3	3	5	5	3	4	1	1	1	2	4	1	1	2	2	5	1	1	1	1	1	2	3	5	5	3	2	3	2	3	1
162	0	9	1	Hangzhou	Shengli	5	5	4	4	3	5	4	4	5	4	4	4	4	3	3	2	3	4	2	2	2	1	3	2	1	2	2	3	3	1	1	2	2	3	1	3	3	2	2	2	2	3	2
163	1	9	1	Hangzhou	Shengli	5	5	5	5	5	5	3	5	4	4	5	5	5	3	3	3	4	4	3	5	2	3	2	2	1	1	2	3	3	1	1	3	1	3	2	3	3	3	2	3	2	1	2
164	0	9	0	Kunming	Zhugou	5	1	5	4	5	4	5	4	4	3	4	3	4	4	5	3	4	4	3	2	2	3	2	2	4	4	2	3	3	1	2	2	1.5	1	2	1	1	2	3	2	2	3	3
165	1	9	1	Kunming	Yunda	5	5	5	3	5	3	5	5	4	3	5	4	3	3	4	3	5	4	3	2	2	3	3	2	2	3	2	3	2	4	1	4	2	3	4	3	3	4	3	4	3	2	4
166	0	9	1	Hangzhou	Shengli	5	5	5	5	5	5	5	5	5	5	5	5	5	4	4	3	4	4	5	4	4	4	4	3	3	3	2	4	3	1	3	4	2	4	1	5	2	3	2	4	3	4	2
167	0	9	1	Hangzhou	Cuiyuan	4	4	5	3	3	3	4	4	4	4	5	3	4	2	3	2	3	4	3	3	1	1	2.5	3	1	1	2	5	4	1	3	3	1	3	1	3	3	3	3	3	2	3	2
168	0	9	0	Kunming	Erjie	2	4	4	5	4	5	5	4	3	4	5	1	3	3	5	4	5	4	4	3	3	4	2	3	3	2	2	3	4	1	2	3	1	2	1	3	2	1	3	2	2	3	2
169	0	9	1	Kunming	Lianhua	5	5	5	5	5	5	5	4	5	4	5	5	5	4	3	2	3	4	5	5	3	4	5	3	1	2	2	4	3	2	4	5	2	3	1	3	4.25	3	4	5	3	3	2
170	0	9	0	Xishuangbanna	Erxiao	4	5	2	5	3	5	4	5	3	4	4	4	4	3	5	3	3	4	5	2	3	4	2	3	2	4	2	4	5	2	2	4	2	2	1	2	3	2	5	3	5	5	3
171	1	9	1	Hangzhou	Shengli	5	5	5	5	5	5	4	3	4.75	5	5	2	4	4	4	3	4	4	4	3	2	3	4	4	4	4	2	4	5	1	1	3	2	5	2	5	5	5	5	5	5	2	5
172	0	9	0	Kunming	Erjie	5	5	5	5	5	5	5	5	5	5	5	5	5	4	4	4	3	4	4	4	3	4	4	4	1	1	2	3	4	1	3	4	1	4	1	4	4	2	3	4	4	4	3
173	1	9	0	Kunming	Zhugou	3	5	5	5	5	5	4	3	3	4	5	4	5	3	5	3	3	4	4	3	5	5	4	4	5	5	2	3	4	1	2	4	5	2	1	4	4	3	1	3	2	1	4
174	1	9	1	Xishuangbanna	Shiji	4	5	5	5	4	5	4	4	5	4	4	4	5	5	5	4	5	4	5	3	4	4	4	4	4	4	2	4	2	2	2	4	2	4	3	3	4	4	4	4	3	4	4
175	0	9	1	Hangzhou	Cuiyuan	5	5	5	5	4	4	4	3	2	4	5	3	4	3	2	2	4	4	5	4	5	2	5	5	5	5	2	4	4	2	3	4	2	5	3	4	4	5	3	4	5	2	2
176	0	9	1	Kunming	Yunda	5	4	5	5	5	5	5	5	5	5	4	4	5	4	5	4	5	4	4	5	4	5	5	5	4	5	2	5	5	1	2	5	1	5	2	4	5	4	5	5	5	5	4
177	0	9	1	Kunming	Lianhua	4	5	5	5	5	5	5	5	5	4	5	4	5	2	5	5	4	4	5	2	1	5	2	5	1	5	2	2	5	5	4	3.5	4	4	1	5	1	1	1	5	5	5	5
178	1	9	1	Kunming	Lianhua	4	5	5	5	5	5	5	5	3	4	4	3	5	3	4	3	4	4.5	5	2	3	2	5	3	2	3	2	3	5	2	1	5	4	2	3	4	4	4	4	2	4	3	4
179	1	9	1	Kunming	Yunda	4	5	5	4	4	4	3	3	2	3	3	3	5	4	4	3	4	4.75	4	2	1	2	1	1	1	1	2	3	2	1	2	1	2	2	1	3	3	3	3	3	3	3	3
180	1	9	1	Hangzhou	Shengli	5	5	5	2	5	3	5	3	4	5	4	4	4	3	5	3	5	5	3	2	5	3	2	1	2.5	2	2	5	5	1	2	5	1	5	2	3	3	3	3	4	5	2	5
181	0	9	0	Kunming	Erjie	4	5	5	5	5	4	3	4	2	3	1	4	5	2	4	3	2	5	4	2	1	2	3	1	5	4	2	3.25	3	1	2	5	2	2.5	3	4	1	1	2	4	3	1	3
182	0	9	0	Kunming	Erjie	5	4	4	3	3	4	3	2	3	1	4	5	2	1	4	2	2	5	3	1	1	1	2	1	1	1	2	2	2	1	5	1	2	5	4	3	1	2	1	3	3	1	2
183	1	9	0	Kunming	Zhugou	4	4	4	4	5	5	4	4	3	4	3	4	5	3	5	4	4	5	4	3	4	4	2	1	1	1	2	1	3	1	5	1	3	2	3	1	1	2	3	4	5	2	4
184	0	9	1	Kunming	Lianhua	3	5	5	5	5	3	5	3	4	2	5	5	5	2	3	4	1	5	4	1	1	3	1	1	1	1	2	1	4	5	3	1	1	1	3	3	2	1	4	1	1	1	1
185	0	9	1	Kunming	Wuhua	5	4	5	5	5	5	5	5	4	3	3.5	5	4	3	4	3	5	5	5	2	1	3	5	1	1	1	2	3	4	1	3	5	4	5	1	5	4	3	4	3	3	3	2
186	1	9	1	Kunming	Wuhua	4	4	4	5	4	3	5	3	4	3	3	5	5	2	4	2	4	5	3	5	2	3	2	1	1	1	2	2	2	4	3	4	1	2	1	3	2	2	3	4	2	3	2
187	0	9	0	Xishuangbanna	Erxiao	5	4	4	1	1	1	4.5	4	4	4	5	3	4	2	4	3	5	5	2	3	1	2	1	1	1	1	2	4	2	1	1	3	1	2	2	3	2	1	2	2	4	3	4
188	0	9	0	Xishuangbanna	Erxiao	5	2	4	5	5	5	4	3	4	2	3	2	4	2	5	4	5	5	3	1	1	4	4	1	2	1	2	3	2	4	3	3	2	3	1	3	1	1	2	2	1	3	2
189	1	9	0	Hangzhou	Nanshan	5	5	5	5	5	5	5	3	4	5	5	3	3	2	3	5	2	5	5	1	1	3	4	2	1	1	2	3	4	1	2	2	1	4	3	1	1	3	3	5	3	5	2
190	0	9	0	Kunming	Erjie	5	5	5	5	5	5	4	5	5	4	5	5	4	4	5	5	5	5	5	3	4	5	3	2	4	5	2	5	3	1	3	4	3	5	1	2	2	3	4	4	5	5	4
191	0	9	0	Kunming	Erjie	4	4	4	4	4	4	4	4	5	3	4	5	5	3	4	3	4	5	4	3	2	2	1	2	1	1	2	3	2	1	1	5	3	2	1	4	2	1	2	3	2	4	3
192	1	9	0	Kunming	Erjie	5	4	5	5	5	5	4	4	3	5	3	3	5	4	3	4	3	5	3	2	3	2	2	2	1	1	2	3	3	1	1	5	1	4	2	2	2	3	2	3	4	2	5
193	0	9	1	Kunming	Lianhua	4	5	5	5	5	5	5	4	5	3	5	4	5	3	4	2	4	5	3	5	1	3	5	2	1	1	2	4	4	2	4	5	2	3	4	5	5	5	5	4	5	3	3
194	0	9	1	Kunming	Wuhua	5	5	5	5	5	5	5	5	5	5	5	5	5	3	5	2	5	5	5	4	2	2	1	2	2	2	2	2	5	1	4	2	1	2	1	5	5	3.75	1	1	2	2	2
195	1	9	1	Kunming	Lianhua	5	5	5	5	5	5	5	5	5	4	4	3	4	4	5	3	4	5	5	2	2	3	4	2	2	2	2	5	5	1	1	4	2	5	3	5	5	5	5	5	5	3	4
196	0	9	0	Xishuangbanna	Erxiao	5	4	5	5	5	5	5	5	4	5	4	4	5	3	4	5	2	5	4	5	2	2	4	2	3	5	2	3	4	1	3	5	2	4	2	4	4	3	3	5	4	4	4
197	1	9	0	Xishuangbanna	Zhongxin	4	5	5	5	5	4	5	3	3	4	3	3	3	2	4	3	4	5	3	5	4	3	4	2	3	3	2	3	2	1	5	2	2	3	2	2	4	2	1	2	5	2	3
198	0	9	1	Xishuangbanna	Shiji	5	5	5	4	5	5	5	5	5	5	4	3	5	5	5	4	5	5	5	5	4	3	5	2	3	4	2	3	3	2	3	5	5	5	5	5	5	5	5	3	4	5	5
199	0	9	1	Xishuangbanna	Yixiao	5	5	5	5	5	5	5	5	5	5	5	5	5	3	5	4	5	5	3	5	3	5	3	2	1	3	2	2	3	1	2	2	3	3	2	4	4	3	4	3	3	3	3
200	1	9	1	Xishuangbanna	Shiji	5	5	5	4	4	4	5	4	4	3	4	5	4	5	5	5	5	5	5	5	5	4	2	2	1	1	2	3	4	3	5	3	2	3	3	3	3	3	3	2	3	2	2
201	0	9	1	Hangzhou	Cuiyuan	5	5	5	5	5	5	5	5	5	5	5	2	5	3	5	2	5	5	4	5	1	4	3	2.25	1	1	2	4	4	1	3	5	1	3	3	4	5	3	2	3	2	1	1
202	0	9	1	Hangzhou	Shengli	5	5	5	5	5	5	5	5	5	5	5	5	5	4	5	5	5	5	5	4	5	5	5	2.75	2	3	2	5	5	1	1	4	3	5	1	4	4	4	4	4	4	4	4
203	0	9	1	Hangzhou	Shengli	5	5	5	5	5	5	5	5	5	4	4	5	5	4	3	5	5	5	3	2	2	5	2	3	2	2	2	2	3	1	2	5	1	3	1	2	2	2	3	3	3	1	3
204	0	9	1	Hangzhou	Shengli	5	5	5	5	5	5	5	5	5	5	5	5	5	3	3	4	4	5	4	2	2	2	4	3	3	4	2	5	4	3	3	3	1	4	2	5	5	5	4	5	5	3	2
205	0	9	1	Hangzhou	Shengli	4	1	5	3	5	5	5	5	5	4	5	3	4	3	5	4	5	5	4	2	2	2	2	3	2	3	2	4	4	1	3	4	1	4	1	3	3	3	3	3	4	2	2
206	0	9	1	Hangzhou	Fenghuang	5	5	5	5	5	4	5	5	5	5	5	5	5	4	5	4	5	5	4	3	4	5	5	3	1	1	2	5	4	1	4	5	1	4	3	3	3	3	3	5	4	2	5
207	0	9	0	Kunming	Erjie	5	5	5	5	5	5	3	5	3	5	5	3	5	3	4	3	4	5	4	2	3	3	2	3	2	4	2	3	4	1	2	5	2	3.5	1	3	3	2	4	3	4	4	3
208	0	9	0	Kunming	Erjie	5	4	4	5	5	5	3	4	3	5	4	4	5	4	4	5	4	5	5	5	4	4	5	3	3	2	2	4	4	1	3	4	3	4	1	5	4	4	3	3	3	4	5
209	0	9	0	Kunming	Zhugou	4	5	5	4	5	4	4	4	5	4	5	5	5	4	5	3	4	5	4	2	2	2	4	3	3	4	2	3	1	1	2	3	2	4	1	2	2	4	3	5	4	2	5
210	0	9	1	Kunming	Lianhua	4	5	5	5	5	5	4	5	5	4	5	3	5	4	3	3	2	5	3	2	3	4	3	3	1	1	2	2	4	1	1	5	1	5	2	4	4	4	3	4	5	2	2
211	1	9	1	Kunming	Wuhua	5	4	5	4	5	5	5	5	5	5	5	5	5	4	5	3	5	5	3.5	5	3	5	3	3	3	3	2	3	3	1	1	5	3	3	2	3	4	2	4	5	4	5	5
212	0	9	1	Kunming	Lianhua	4	2	5	4	5	5	5	5	5	4	4	4	5	3	5	4	4	5	4	3	3	4	5	3	1	1	2	5	3	3	2	4	3	4	2	3	3	2	3	4	4	3	4
213	0	9	1	Kunming	Lianhua	4	5	5	4	4	4	3	3	3	3	3	5	4	3	4	2	3	5	3	1	2	2	2	3	2	2	2	3	4	2	3	3	2	3	3	5	5	5	4	3	2	2	2
214	0	9	1	Kunming	Lianhua	4	5	5	5	4	5	5	4	4	5	5	4	5	3	5	3	4	5	4	5	3	4	5	3	2	4	2	4	4	1	2	5	2	3	3	5	5	3	3	5	3	4	3
215	0	9	1	Kunming	Yunda	4	4	4	4	4	4	4	4	4	4	4	4	4	1	5	5	5	5	5	4	4	3	4	3	2	4	2	5	4	3	3	2	1	2	4	5	5	3.25	4	3	5	5	4
216	1	9	1	Kunming	Lianhua	5	5	5	5	5	5	5	4	4	4	5	3	5	3	4	2	4	5	3	4	3	4	2	3	1	1	2	3	4	1	3	5	2	4	3	2	2	2	3	4	4	2	2
217	1	9	1	Kunming	Yunda	3	5	4	4	5	4	3	3	4	3	5	4	5	3	4	3	4	5	2	3	2	3	5	3	4	4	2	4	4	1	2	5	1	2	1	3	4	5	4	3	4	2	3
218	0	9	0	Xishuangbanna	Erxiao	4	2	5	5	5	4	3	4	4	5	5	4	5	3	4	3	5	5	3	4	4	5	3	3	3	3	2	4	3	1	5	5	5	4	1	2	3	3	2	3	4	4	5
219	1	9	1	Xishuangbanna	Shiji	5	5	5	4	5	5	4	5	4	5	5	4	5	4	5	3	4	5	5	3	3	3	5	3.5	3	3	2	4	3	1	1	3	2	4	2	4	4	3	2	3	3	4	3
220	1	9	0	Kunming	Erjie	4	4	5	5	5	5	4	5	3	4	4	4	5	4	4	5	4	5	5	4	5	4	5	4	5	5	2	4	4	1	4	4	5	4	1.5	5	5	5	2	5	4	3	4
221	1	9	1	Kunming	Lianhua	5	5	5	5	5	5	5	4	4	5	5	4	4	4	4	5	4	5	4	2	1	3	3	4	1	1	2	3	3	1	3	3	2	5	2	4	4	4	4	4	4	4	4
222	0	9	1	Kunming	Lianhua	5	5	5	5	3	5	5	4	5	4	5	5	5	4	4	5	2	5	2	5	3	2	3	4	1	1	2	3	4	1.5	3	5	1	5	1	3	3	2	2	4	2	3	4
223	0	9	1	Kunming	Wuhua	5	5	5	5	4	5	5	5	4	5	5	4	5	4	5	5	4	5	5	4	3	4	5	4	4	5	2	5	4	1	1	4	1	3	1	5	5	5	5	4	5	3	5
224	1	9	1	Kunming	Lianhua	5	4	5	5	5	5	5	5	5	5	4	5	5	4	5	4	5	5	5	3	3	4	5	4	5	4	2	3	4	1	4	3	2	4	1	2	4	5	4	4	4	5	5
225	1	9	1	Kunming	Lianhua	4	5	5	5	5	5	4	5	5	5	4	5	5	4	5	4	5	5	5	5	3	5	5	4	2	4	2	5	5	3	1	5	3	4	3	4	4	3	2	5	5	4	5
226	1	9	1	Kunming	Wuhua	4	5	5	4	4	3	4	4	4	3	5	4	5	3	4	2	5	5	1	2	2	3	3	4	3	3	2	4	3	1	1	4	3	4	1	4	3	2	1	3	3	3	4
227	1	9	1	Kunming	Wuhua	5	5	5	5	5	5	5	4	5	5	5	4	5	4	5	2	4	5	3	2	1	2	4	4	1	1	2	3	3	1	1	3	1	2	1	2	1	1	2	3	2	2	2
228	1	9	0	Xishuangbanna	Erxiao	3	1	5	5	5	5	4	5	3.75	5	2	1	5	3	4	3	3	5	1	1	2	4	4	4	3	2	2	4.5	1	1	2	2	1	3	1	2	2	1	2	2	3	2	1
229	1	9	0	Xishuangbanna	Erxiao	5	5	5	4	5	5	4	5	4	5	4	4	5	4	5	5	4	5	3.5	4	1	4	4	4	4	4	2	4	2	2	3	2	2	4	3	2	2	2	2	5	5	5	4
230	0	9	1	Xishuangbanna	Shiji	5	4	5	5	5	5	4	3	5	4	5	5	4	2	4	4	4	5	3.75	4	5	5	5	4	3	4	2	3	1	1	3	4	3	4	1	5	5	4	5	3	5	5	5
231	0	9	1	Xishuangbanna	Yixiao	5	5	5	5	5	5	5	5	5	4	5	4	5	4	5	5	5	5	5	4	2	2	5	4	2	2	2	5	4	1	3	5	1	3	2	4	3	1	4	5	4	3	1
232	0	9	1	Hangzhou	Shengli	5	5	5	4	4	5	5	5	5	5	5	5	5	4	5	4	3	5	3	4	5	5	5	5	1	3	2	5	5	1	3	3	1	4	1	3	4	5	2	5	2	3	4
233	0	9	0	Kunming	Zhugou	4	5	3	5	4	4	3	5	5	4	4	5	5	3	5	4	5	5	4	4	4	3	2	5	2	4	2	4	2	1	2	4	3	4	4	3	3	3	2	4	4	5	4
234	0	9	1	Kunming	Wuhua	5	5	5	5	5	5	4	5	5	5	5	5	5	4	5	5	4	5	5	5	3	5	5	5	4	3	2	4	5	1	5	2	1	4	2	4	5	2	3	4	3	5	3
235	1	9	1	Kunming	Lianhua	5	5	5	5	5	5	4	4	4	4	4	4	5	3	1	5	2	5	5	5	1	5	3	5	1	1	2	3	5	2	1	1	1	5	4	5	5	5	5	3	5	2	1
236	1	9	1	Kunming	Yunda	5	5	5	5	5	5	5	5	5	5	5	5	5	5	5	5	5	5	5	4	4	5	5	5	3	3	2	4	5	1	3	5	2	5	1	5	5	5	5	5	5	5	5
237	0	9	1	Kunming	Lianhua	5	5	5	5	5	5	4	3	5	4	5	4	5	3	3	5	4	5	5	5	4	5	3	5	4	3	2	4	5	3	3	5	1	4	3	3	4	5	3	5	5	3	5
238	0	9	1	Kunming	Lianhua	5	5	5	5	5	5	5	5	5	5	5	5	5	5	5	3	3	5	5	4	2	4	5	5	1	5	2	4	5	2	1	5	2	5	2	4	5	3	2	4	4	5	5
239	0	9	1	Kunming	Lianhua	5	5	5	5	5	5	4	5	5	5	5	5	5	3	5	3	5	5	5	5	1	5	5	5	1	5	2	5	5	3	3	5	1	5	1	5	5	5	2	5	5	5	5
240	0	9	1	Kunming	Lianhua	5	5	5	5	5	5	5	5	5	5	5	5	5	5	5	3	5	5	5	5	5	5	5	5	1	5	2	5	5	5	2	5	3	5	4	5	5	5	5	5	5	5	5
241	0	9	1	Kunming	Lianhua	4	4	5	4	5	5	4	4	5	5	5	4	5	3	5	5	5	5	5	4	4	5	5	5	5	5	2	4	4	1	3	5	1	3	2	4	4	5	4	5	5	5	4
242	0	9	1	Kunming	Wuhua	5	5	5	5	5	5	5	4	4	5	5	5	5	3	5	5	5	5	5	3	3	3	4	5	3	5	2	5	5	1	2	5	2	3	4	5	5	5	5	5	5	5	4
243	1	9	1	Kunming	Lianhua	4	5	5	4	5	5	4	5	5	5	4	2	4	5	2	4	5	5	5	3	5	4	2	5	2	5	2	5	3	1	5	5	2	4	2	5	5	5	5	4	5	3	4
244	1	9	1	Kunming	Wuhua	5	5	5	5	5	5	5	5	5	5	5	5	5	4	4	4	5	5	5	5	5	4	5	5	5	5	2	2	4.25	1	2	5	1	5	1	4	4	4	4	4	5	4	5
245	1	9	1	Kunming	Yunda	4	5	5	5	5	5	5	5	5	5	4	3	5	3	5	5	4	5	5	5	4	5	4	5	5	5	2	5	5	2	2	5	1	1	1	5	5	5	5	5	5	5	5
246	1	9	0	Xishuangbanna	Erxiao	5	5	4	4.75	5	5	4	4	3	3	1	4	5	3	5	2	4	5	5	3	1	2	4	5	3	4	2	5	3	1	3	4	3	5	3	1	1	4	5	3	3	2	5
247	1	9	0	Xishuangbanna	Erxiao	4	2	5	5	1	1	4	5	4	2	3	2	5	5	5	3	5	5	5	4	3	5	5	5	3	3	2	5	1	1	2	3.25	5	5	1	5	5	5	5	5	4	4	4
248	1	9	1	Xishuangbanna	Yixiao	5	5	5	5	5	5	5	5	5	5	5	5	5	5	2	2	2	3	3	2	1	3.75	3	2	2	2	2.25	3	2	2	3	3	2	3	5	3	3	2	2	2	2	2	3
249	0	9	0	Xishuangbanna	Zhongxin	4	4	5	4	5	4	5	5	5	4	5	3	3	4	5	4	3	4	2	3	4	3	4	3	2	2	2.75	3	3	1	4	2.75	2	1	2	5	5	5	4	3.25	3	2	4
250	0	9	1	Kunming	Wuhua	4	5	5	5	5	5	5	5	5	5	5	5	5	4	5	4	5	5	5	5	5	5	5	5	5	5	2.75	3	4.25	5	5	5	5	5	5	5	5	5	5	5	5	5	5
251	0	9	1	Kunming	Yunda	4	5	5	4	3	4	5	4	5	4	5	5	3	2	4	1	3	1	1	5	1	2	1	1	1	1	3	2	5	3	5	5	1	2	1	3	3	3	2.75	2	4	3	4
252	0	9	1	Kunming	Wuhua	3	4	5	4	4	4	5	3	4	2	3	4	3	2	3	1	3	1	1	1	2	4	1	1	1	1	3	1	4	3	2	3	1	3	2	3	1	3.75	3	1	1	3	2
253	0	9	0	Xishuangbanna	Erxiao	4	4	5	4	5	5	4	5	4	5	5	4	4	2	5	1	1	1	1	3	2	3	2	1	1	2	3	4	1	1	2	3	3	3	1	2	2	2	3	4	2	5	2
254	0	9	1	Hangzhou	Fenghuang	5	5	4	5	5	5	4	4	4	3	4	5	5	3	2	3	2	2	2	2	1	1	1	1	1	1	3	3	5	3	5	1	2	1	1	3	1	3	3.25	1	2	4	2
255	1	9	1	Xishuangbanna	Shiji	4	5	5	4	4	4	3	3	4	3	4	3	4	2	4	2	1	2	2	1	3	2	1	1	1	1	3	2	2	1	2	4	1	4	2	1	2	1	1	4	2	1	2
256	1	9	1	Kunming	Wuhua	3	5	5	4	5	4	3	4	4	4.5	5	5	4	2	2	3	2	2	2	5	2	3	3	2	3	2	3	3	3	3	4	3	3	3	3	3	3	3	3	3	3	3	3
257	1	9	1	Xishuangbanna	Shiji	5	5	4	5	5	4	5	5	5	5	4	5	5	3	2	2	3	2	4	2	4	2	3	2	2	5	3	4	1	1	4	4	4	4	4	5	5	5	5	5	3	5	3
258	1	9	1	Kunming	Yunda	4	5	4	4	5	5	4	5	5	3	5	5	5	4	4	3	3	2	5	2	2	2	4	3	3	3	3	5	5	5	3	5	3	5	2	3.5	2	4	3	2	4	3	4
259	0	9	0	Xishuangbanna	Changle	5	3	4	5	5	5	4	3	5	4	3	5	5	3	5	2	2	2	2	2	4	2	2	3	1	2	3	3	2	2	3	3	4	3	2	1	1	1	1	3	2	4	2
260	0	9	0	Xishuangbanna	Zhongxin	3	4	4	5	2	5	5	5	3	4	5	4	4	4	5	3	5	2	5	3	4	5	3	4	4	5	3	5	4	5	3	3	5	4	3	4	3	4	4	3	5	3	4
261	0	9	0	Xishuangbanna	Erxiao	5	4.5	5	3	2	5	4	4	3	3	4	2	1	4	4	3	3	2	1	2	1	3	2	4	1	1	3	5	4	3	5	3	1	3	1	5	5	5	5	5	5	5	5
262	0	9	1	Xishuangbanna	Yixiao	4	5	5	3	5	5	5	5	5	4	3	4	5	3	2	4	4	2	4	4	1	1	4.75	4	1	1	3	3	2	1	3	4	2	4	1	3	2	1	4	4	5	5	1
263	0	9	1	Hangzhou	Shengli	3	4	4	3	4	5	4	3	2	3	2	4	4	2	3	4	3	3	4	2	1	3	2	1	2	3	3	3	2	1	3	2	3	2	1	2	2	2	2	3	1	1	2
264	0	9	1	Kunming	Yunda	4	5	5	5	5	4	5	5	4	4	4	5	5	4	4	4	3	3	3	4	3	4	4	3	2	2	3	3	3	4	2	2	2	4	4	3	4	3	3	5	3	3	4
265	1	9	0	Xishuangbanna	Erxiao	5	4	4	5	5	5	2	4	4	5	3	3	4	3	4	2	3	3	2	5	2	4	3	3	2	1	3	2	3	1	5	3	1	3	1	4	3	3	2	3	3	4.5	4.25
266	1	9	0	Xishuangbanna	Erxiao	3	5	5	3.75	4	4	4	4	5	3	4	3	3	3	4	3	4	3	2	2	2	2	3	3	3	5	3	2	2	3	5	2	2	2	2	3	3	4	3	2	3	2	3
267	0	9	1	Xishuangbanna	Yixiao	4	5	5	5	5	5	5	5	5	5	5	5	5	4.75	4	4	4	3	3	4	3	4	3	3	4	3	3	3	2	3	2	4	3	4	3	3	3	3	3	5	3	5	4
268	0	9	1	Hangzhou	Fenghuang	4	4	4	5	5	5	4	5	3	3	5	3	5	2	3	3	3	3	3	1	3	3	3	4	3	1	3	2	5	2	4	2	1	1	1	2	2	1	1	1	2	1	2
269	1	9	0	Kunming	Erjie	4	5	5	4	4	5	4	3	3	4	5	2	2	2	4	3	2	4	3	2	1	2	4	1	2	3	3	4	3	2	2	4	1	4	1	2	1	1	1	2	3	3	3
270	1	9	0	Kunming	Erjie	5	5	5	5	3	5	3	4	4	3	4	3	5	3	4	2	3	4	3	3	3	4	1	1	1	1	3	2	4	1	5	3	2	2	2	2	2	1	2	3	3	4	2
271	1	9	0	Xishuangbanna	Erxiao	2	5	5	3	4	5	4	4	5	3	5	3	5	2	4	5	3	4	1	1	3	5	4	1	3	4	3	4	1	2	2	3	1	4	3	3	4	2	3	4	2	4	2
272	1	9	1	Hangzhou	Shengli	5	5	5	4	3	3	4	3	5	4	5	2	4	2	3	4	3	4	2	2	5	2	4	2	3	3	3	5	3	2	1	5	2	4	3	3	3	2	2	4	3	2	2
273	0	9	0	Kunming	Zhugou	4	3	5	3	3	3	3	4	3	3	5	2	3	4	5	2	3	4	4	2	1	2	3	2	2	3	3	4	5	3	2	2	3	1	2	4	1	2	5	2	1	1	1
274	1	9	0	Xishuangbanna	Erxiao	4	3	3	4	4	5	5	5	4	5	4	3	5	3	4	2	3	4	4	5	4	3	4	2	1	3	3	4	2	1	1	3	2	4	2	3	3	3	2	5	5	5	5
275	0	9	1	Hangzhou	Shengli	5	5	5	5	5	5	5	5	5	5	5	5	5	3	3	2	2	4	3	2	2	4.5	3	3	1	1	3	2	4	1	1	3.25	2.5	3	1	3	2	3	2	3	2	2	2
276	1	9	1	Kunming	Wuhua	4	5	5	4	5	4	3	4	4	3	4	5	4	3	4	3	3	4	4	3	2	3	4	3	3	3	3	3.5	4	1	1	4	1	3	2	3	4.25	3	3	4	4	4	4
277	1	9	1	Kunming	Yunda	5	5	5	5	5	5	5	4	4	4	5	4	5	3	4	5	3	4	4	4	2	4	5	3	5	5	3	5	5	1	2	5	3	3	3	5	4	3	2	5	5	3	3
278	0	9	0	Xishuangbanna	Erxiao	4	4	5	5	5	4	4	5	4	5	4	4	4	3	4	3	3	4	4	2	3	4	3	3	2	2	3	4	4	1	4	2	4	3	2	4	4	3	2	3	4	2	3
279	1	9	0	Xishuangbanna	Erxiao	3	1	5	4	5	5	4	5	4	5	5	2	5	3	5	2	3	4	5	3	3	4	2	3	3	3	3	2	2	1	1	4	2	4	1	2	2	1	3	2	2	5	3
280	0	9	1	Xishuangbanna	Shiji	4	4	4	4	4	4	4	4	4	3	3	4	4	4	4	3	4	4	4	4	3	4	4	3	3	3	3	4	3	2	3	4	3	4	3	4	4	4	4	4	3	4	2
281	0	9	0	Kunming	Zhugou	4	5	3	4	5	5	5	5	3	3	5	3	4	3	5	4	5	4	4	3	5	4	3	4	5	4	3	4	2	2	4	4	1	4	4	4	2	1	3	4	2	5	4
282	1	9	1	Kunming	Yunda	4	5	4	5	5	4	5	3	3	5	5	5	5	4	4	3	3	4	3	2	1	3	4	4	2	2	3	5	5	5	3	5	5	4	5	4	5	4	5	5	5	5	4
283	0	9	0	Xishuangbanna	Erxiao	5	5	4	5	4.75	5	4	5	4	3	2	5	4	4	5	5	5	4	5	3	3	5	5	4	4	4	3	5	3	2	1	3	2	1	3	3	2	4	4	3	4	4	4
284	0	9	0	Xishuangbanna	Erxiao	5	3	4	4	4	5	5	3	3	4	4	2	3	3	5	3	4	4	3	2	3	2	2	4	2	2	3	4	4	1	2	3	2	4	2.75	1	3	2	3	2	3	4	3
285	0	9	1	Kunming	Lianhua	5	5	5	5	5	5	5	5	5	5	5	5	5	5	4	4	4	4	5	2	1	3	5	5	5	5	3	5	5	5	4	5	5	5	5	5	5	5	5	5	3	5	5
286	1	9	1	Kunming	Wuhua	5	5	5	5	5	5	5	5	5	5	4	5	5	5	5	4	4	4	5	5	5	5	5	5	5	5	3	4	4	2	1	3	2	4	1	4	4	4	4	4	4	4	4
287	1	9	0	Xishuangbanna	Zhongxin	5	5	5	5	5	5	5	5	5	4	5	5	5	3	5	5	5	4	5	5	2	5	5	5	5	5	3	5	4	1	4	5	2	5	2	5	5	5	5	4	5	3	5
288	0	9	0	Xishuangbanna	Erxiao	3	5	4	4	1	1	4	4	4	5	5	3	5	3	4	5	4	4.75	4	3.5	3	4	3	4	3	5	3	3.5	3	2	2	4	1	4	1	3	4	3.25	4	4	2.75	3	4
289	0	9	0	Kunming	Erjie	3	5	4	1	4	1	4	5	4	4	5	3	4	3	3	2	2	5	4	1	3	1	1	1	1	1	3	2	3	2	3	2	1	1	1	1	1	2	1	2	1	5	1
290	0	9	1	Kunming	Lianhua	5	4	5	5	5	5	5	3	3	4	5	4	5	3	3	4	4	5	5	2	1	3	2	1	4	2	3	4	5	1	1	3	3	5	1	5	5	3	3	2	1	5	5
291	1	9	1	Kunming	Yunda	4	5	5	4	4	3	5	3	3	2	5	5	3	2	2	1	3	5	4	3	1	4	1	1	1	1	3	1	5	5	3	2	4	4	3	3	1	1	3	2	4	1	1
292	1	9	1	Kunming	Yunda	3	5	5	4	5	4	3	3	4	3	5	3	4	4	5	5	3.75	5	5	3	2	2	1	1	1	1	3	5	3	3	5	3	1	5	2	2	2	3	3	5	2	5	3
293	1	9	0	Xishuangbanna	Zhongxin	4	5	3	3	2	5	5	2	3	4	1	5	3	2	4	1	3	5	3	2	3	4	3	1	1	1	3	3	1	1	2	1	5	4	2	2	1	1	3.25	3	5	4	1
294	1	9	0	Hangzhou	Nanshan	5	4	5	5	5	5	5	4	5	5	3	5	4	3	4	3	4	5	5	5	1	5	5	2	1	1	3	5	2	1	5	5	5	4	2	2	2	3	2	4	4	5	4
295	0	9	0	Kunming	Erjie	4	5	4	4	4	5	5	4	4	5	4	5	5	5	4	4	5	5	4	4	4	3	4	2	1	1	3	4	3	1	2	3	2	4	5	3	2	2	3	3	2	3	2
296	0	9	1	Kunming	Lianhua	5	5	5	5	5	5	5	4	4	2	5	4	5	3	5	2	3	5	2	5	1	1	1	2	1	2	3	2	4	3	2	5	3	5	1	5	5	1	3	3	5	1	4
297	1	9	1	Kunming	Wuhua	4	4	5	4	4	5	5	4	3	5	3	3	4	3	5	3	5	5	5	2	3	3	2	2	3	3	3	2	4	1	1	3	2	4	2	4	3	2	3	4	3	5	3
298	1	9	1	Kunming	Yunda	5	5	5	4	5	5	5	5	5	5	4	2	5	3	4	3	4	5	5	2	2	3	4	2	3	4	3	2	4	2	2	5	2	2	1	2	3	3	2	3.5	5	5	5
299	0	9	1	Xishuangbanna	Yixiao	5	5	5	5	5	5	4	4	5	4	5	4	5	5	4	3	5	5	5	3	2	4	4	2	1	1	3	5	3.25	3	2	5	3	4	5	3	3	3	4	3	3	5	3
300	0	9	1	Xishuangbanna	Yixiao	5	5	5	5	5	5	4	4	5	4	5	4	5	5	4	3	5	5	5	3	2	4	4	2	2	2	3	5	2	1.75	3.25	4	5	5	2.75	4	5	4	4	5	4	4	4
301	1	9	1	Xishuangbanna	Shiji	5	5	5	5	5	5	5	4	4	5	4	4	4	4	5	1	4	5	3	3	2	3	3	2	1	1	3	3	3	1	3	4	2	2	3	2	3	1	1	3	3	1	2
302	1	9	0	Hangzhou	Nanshan	5	5	5	5	5	5	5	5	4	4	4	5	5	3	3	4	5	5	4	4	2.5	5	4	3	1	1	3	3	4	2	2	4	2	5	2	4	4	3	3	5	4	5	5
303	1	9	0	Hangzhou	Nanshan	5	5	5	5	5	5	5	5	5	5	5	2	5	3	4	3	5	5	4	4	2	3	4	3	2	2	3	3	4	1	1	4	1	3	1	3	3	3	3	5	2	3	2
304	1	9	0	Kunming	Erjie	4	5	5	1	5	5	5	4	4	5	5	1	5	2	3	2	4	5	2	2	2	2	2	3	3	3	3	2	3	1	1	5	3	2	1	2	2	2	3	2	2	3	2
305	0	9	1	Kunming	Wuhua	5	4	5	5	5	5	5	5	4	3	4	5	4	3	4	5	3	5	4	4	2	3	2	3	2	3	3	1	2	2	2	3.25	2	1	1	2	2	2	2	5	5	2	4
306	1	9	0	Xishuangbanna	Zhongxin	5	5	4	5	5	4	5	3	4	4	5	3	4	2	5	4	3	5	4	3	2	2	2	3	3	4	3	2	1	1	2	2	3	3	4	2	3	1	1	3	3	2	2
307	1	9	1	Xishuangbanna	Shiji	5	5	5	5	5	5	5	5	5	5	5	5	5	4	5	5	5	5	5	5	4	3	4	3	2	3	3	3	2	1	3	5	5	5	2	5	5	4	3.5	5	5	4	5
308	1	9	1	Xishuangbanna	Shiji	5	3	4	3	3	4	3	4	2	2	4	2	3	4	5	3	4	5	3	3	2	3	2	3	2	2	3	2	2	1	1	2	3	2	1	3	3	2	2	4	2	2	2
309	0	9	1	Hangzhou	Cuiyuan	5	5	5	5	5	5	5	5	5	5	5	5	5	3	3	5	5	5	5	5	3	2	4	4	5	4	3	3	4	2	1	5	4	5	2	5	5	5	5	5	5	4	4
310	0	9	0	Kunming	Zhugou	5	5	5	5	5	5	5	5	5	5	5	5	5	5	5	3	5	5	5	5	3	5	3	4	5	5	3	5	4	3	3	5	5	5	1	3	3	3	3	5	5	4	4
311	0	9	1	Kunming	Yunda	3	2	5	5	5	5	5	4	5	5	5	3	3	5	5	4	5	5	1	2	3	5	2	4	3	4	3	4	5	5	3	4	3	4	3	5	4	5	5	4	4.25	5	5
312	0	9	0	Xishuangbanna	Erxiao	5	5	5	5	5	5	4	5	4	5	5	5	4	4	5	4	5	5	5	4	3	4	4	4	4	4	3	5	4	2	1.75	3	2	5	2	4	4	4	4	5	5	4	4
313	0	9	1	Xishuangbanna	Shiji	5	5	5	5	5	5	4	5	4	5	3	4	4	4	4	5	5	5	5	4	3	5	5	4	3	5	3	4	5	2	3	3	1	5	3	4	5	4	4	5	3	5	5
314	1	9	1	Xishuangbanna	Yixiao	5	5	5	5	5	5	5	5	5	5	5	4	5	4	5	4	5	5	5	4	4	4	5	4	4	2	3	3	4	1	1	5	4	5	3	3	4	3	3	5	5	5	5
315	1	9	0	Hangzhou	Lijia	5	5	5	3	5	5	5	5	3	5	5	5	5	5	5	5	5	5	5	5	5	5	5	5	5	5	3	5	2	1	5	1	1	5	1	5	5	5	5	5	5	4	5
316	0	9	1	Hangzhou	Shengli	5	5	5	5	5	5	5	5	5	5	5	5	5	4	5	5	5	5	5	5	5	5	5	5	1	2	3	4	4	1	3	4	1	4	3	4	4	4	4	4	3	3	2
317	1	9	1	Hangzhou	Fenghuang	3	4	3	5	5	5	5	5	5	1	5	5	5	3	5	2	4	5	2	5	1	4	5	5	1	1	3	5	5	5	2	5	2	5	5	3	5	2	5	5	5	1	5
318	0	9	1	Kunming	Yunda	4	5	5	2	5	5	4	5	5	5	4	4	5	4	4	4	5	5	5	5	4	4	5	5	3	3	3	5	4	2	2	4	1	4	1	4	3	2	2	5	4	4	2
319	1	9	1	Kunming	Yunda	5	5	5	5	5	5	4	5	5	3	5	5	5	3	5	4	5	5	5	4	3	3	3	5	1	1	3	5	5	2	5	4	3	5	4	5	4	5	4	5	5	5	4
320	1	9	1	Kunming	Yunda	5	5	5	5	5	5	5	5	5	5	5	4	5	5	5	4	4	5	5	5	4	5	5	5	4	4	3	5	4	1	4	4	3	4	2	5	5	5	5	4	5	4	4
321	1	9	0	Xishuangbanna	Erxiao	5	5	4.25	4	5	5	4	4	3	5	5	4	5	4	5	3	5	5	4	4	3	4	3	5	4	5	3	5	4	1	2	1	1	4	2	3.5	4	2.5	4	3.25	5	5	2
322	1	9	0	Xishuangbanna	Erxiao	5	1	5	5	5	5	5	5	5	5	4	4	4	4	5	5	5	5	5	5	5	5	5	5	5	5	3	5	3	2	3	5	3	5	2	5	5	5	5	5	5	5	4
323	1	9	0	Xishuangbanna	Erxiao	4	5	4	5	5	5	5	5	4	3	4	4	5	4	5	4	4	5	4	5	5	4	4	5	3	4	3	4	4	3	2	4	3	3	4	5	5	4	4	5	4	5	4
324	1	9	1	Xishuangbanna	Shiji	4	5	5	4	5	3	4	4	3	4	5	4	3	3	3	5	4	5	4	3	3	5	4	5	3	3	3	4	5	3	4	3	4	5	3	3	3	3	3	3	3	4	3
325	1	9	1	Hangzhou	Fenghuang	5	5	5	5	5	5	5	5	5	5	5	4	5	2	3	3	5	1	2	2	2	2	3	2	1	3	4	4	2	2	1	5	1	2	1	2	2	2	2	2	2	2	5
326	0	9	0	Kunming	Zhugou	3	1	5	5	5	5	5	1	5	4	4	4	3	4	5	5	3	2	5	1	2	5	1	1	4	4	4	5	5	1	1	4	5	5	3	5	5	4	4	5	3	5	2
327	0	9	0	Xishuangbanna	Zhongxin	4	5	5	4	5	5	5	5	5	4	5	5	5	3	4	3	5	2	5	3	4	4	4	5	2	2	4	2	2	2	1	4	5	2	4	4	3	4	5	5	2	3.75	3
328	1	9	0	Kunming	Erjie	3	4	5	5	5	5	4	4	2	5	5	4	4	3	4	2	4	3	3	2	2	5	3	2	1	1	4	3	3	1	1	5	1	3	1	3	2	2	3	3	5	3	2
329	0	9	1	Hangzhou	Fenghuang	5	3	4	3	4	5	4	3	4	4	4	3	3	3	4	3	2	3	3	2	2	2	3	3	2	3	4	3	3	1	2	4	1	3	2	3	3	3	3	2	2	3	2
330	0	9	0	Xishuangbanna	Zhongxin	4	5	5	3	4	4	5	4	3	3	3	2	5	2	4	2	4	3	3	2	2	2	2	3	2	2	4	2	2	1	5	4	1	2	5	2	2	2	2	3	2	4	3
331	1	9	0	Xishuangbanna	Changle	4	3	5	4	3	4	4	3	4	3	4	5	4	4	3	3	5	3	3	4	2	2	4	3	5	4	4	3	4	2	5	3	4	2	3	3	5	2	5	3	4	5	3
332	0	9	1	Hangzhou	Shengli	5	5	5	5	4	5	2	4	2	2	5	5	5	2	3	3	2	4	1	4	2	4	5	1	1	1	4	3	2	1	1	3	1	2	1	2	2	2	2	3	2	1	4
333	1	9	0	Kunming	Zhugou	3	4	4	3	5	3	3	4	1	1	5	3	5	1	5	2	5	4	2	2	2	3	1	2	1	1	4	3.5	3.25	1	2	4	1	1	1	1	1	1	1	1	3	1	1
334	0	9	0	Xishuangbanna	Zhongxin	4	5	4	4	5	5	5	5	5	4	3	3	5	4	5	4	5	4	5	2	5	4	3	2	3	5	4	5	1	1	1	3	4	4	2	5	4	5	4	3	5	4	2
335	0	9	1	Xishuangbanna	Shiji	5	5	5	5	4	4	5	5	5	5	5	3	5	4	3	5	4	4	4	3	1	2	4	2	1	1	4	3	1	1	3	4	1	4	1	4	4	4	4	3	1	1	1
336	1	9	0	Hangzhou	Lijia	5	5	5	5	5	5	4	4	5	5	3	3	5	4	5	4	4	4	4	4	5	4	3	3	3	3	4	3	1	1	1	5	2	3	1	2	2	2	2	4	4	4	4
337	1	9	0	Xishuangbanna	Zhongxin	4	5	5	4	2	3	5	4	3	3	3	1	2	2	4	3	2	4	4	1	1	2	3	3	1	1	4	2	4	3	1	1	3	3	2	3	2	4	2	3	2	4	2
338	1	9	0	Xishuangbanna	Erxiao	5	3	4	1	5	4	3	1	4	5	5	5	5	3	4	2	3	4	4	1	2	2	5	3	5	4	4	3	4	4	5	5	4	1	1	4	4	3	1	1	1	3.5	5
339	0	9	1	Xishuangbanna	Shiji	4	5	5	4	5	3	3	4	4	5	5	3	4	5	4	3	5	4	5	4	4	3	4	3	4	3	4	3	4	1	2	3	3	3	2	3	3	3	4	4	2	5	3
340	0	9	1	Hangzhou	Shengli	4	5	4	4	4	5	5	4	3	2	5	5	4	4	3	2	4	4	5	4	3	5	5	4	2	1	4	4	3	4	3	5	5	5	5	4	2	3	5	2	3	5	3
341	1	9	0	Kunming	Erjie	4	4	4	4	4	4	4	4	4	4	4	4	4	4	3	5	4	4	3	2	4	3	5	4	2	4	4	4	3	5	5	3	4	4	1	3	4	2	3	3	4	2.25	5
342	0	9	0	Xishuangbanna	Erxiao	5	4	4	4	5	5	5	4	5	4	5	4	4	4	4	4	4	4	4	4	4	4	4	4	4	4	4	4	4	4	1	4	4	2	4	4	4	4	4	4	4	4	4
343	0	9	1	Kunming	Wuhua	3	4	5	4	5	5	4	5	5	4	5	5	4	3	5	2	4	4.75	5	5	2	4	4	2	2	2	4	4	3	3	3	4	4	2	3	3	3	4	5	3	3	3	2
344	1	9	0	Hangzhou	Lijia	4	5	5	4	4	3	4	4	4	3	2	4	3	3	3	4	2	5	3	1	2	2	1	1	1	1	4	1	2	1	3	1	3	4	1	1	1	1	1	2	2	2	2
345	0	9	1	Hangzhou	Fenghuang	5	5	5	5	5	5	5	5	5	5	4	5	4	2	3	3	2	5	5	2	1	2	1	1	3	1	4	3	5	3	4	4	2	4	1	5	5	5	5	5	4	2	2
346	1	9	1	Kunming	Wuhua	4	5	4	3	3	5	3	4	3	5	4	1	5	3	3	2	4	5	3	2	2	3	2	2	2	2	4	2	4	3	3	3	2	3	2	3	2	3	3	3	4	3	2
347	0	9	0	Xishuangbanna	Changle	4	3	5	5	5	5	3	5	4	5	5	5	4	3	4	3	3	5	4	4	3	4	2	2	2	2	4	3	4	4	3	2	3	3	4	2	2	2	2	3	4	5	2
348	0	9	0	Xishuangbanna	Zhongxin	4	5	5	4	5	4	4	4	5	4	4	3	4	3	4	3	4	5	3	3	2	2	3	2	3	3	4	3	4	4	2	2	2	3	2	4	4	3	3	3	3.75	3.25	2
349	0	9	0	Kunming	Zhugou	5	5	5	5	5	5	5	5	5	5	5	1	5	3	5	5	5	5	5	5	2	5	5	3	2	2	4	5	2	5	2	5	1	2.75	5	4	4	5	1	5	3	5	5
350	1	9	1	Kunming	Lianhua	3	5	5	5	3	4	4	5	4	5	5	2	5	2	3	2	3	5	2	1	2	4	1	3	3	2	4	4	3	1	5	4	3	5	1	3	4	3	4	3	3	2	2
351	0	9	0	Xishuangbanna	Erxiao	5	5	5	5	5	5	5	5	3	4	4	4	5	3	4	3.5	3	5	5	4	4	5	4	3	4	4	4	5	2	2	5	4	3	4	4	4	4	5	2	5	4	4	5
352	0	9	1	Hangzhou	Fenghuang	4	5	5	5	5	5	4	5	5	4	5	5	5	4	4	4	5	5	5	5	4	4	4	4	3	3	4	5	5	3	3	5	3	4	2	5	5	5	5	5	4	5	5
353	1	9	1	Hangzhou	Shengli	4	5	5	3	3	5	3	4	3	2	1	1	4	2	4	5	4	5	4	3.75	3	4	1	4	3	5	4	5	5	5	3	5	5	5	5	3	4	5	3.5	5	2.5	1	1
354	0	9	0	Xishuangbanna	Erxiao	4	4	5	4	4	4	4	5	4	5	4	4	4	4	5	4	5	5	4	3	3	4	4	4	4	5	4	4	5	3	4	5	2	4	1	4	4	3	4	4	4	4	5
355	1	9	0	Kunming	Zhugou	5	3	5	5	4	4	4	5	5	4	5	5	5	4	5	5	3	5	5	5	4	5	4	5	4	5	4	3	2	4	2	4	4	3	4	3	2.75	2	2	1	2	1	1
356	0	9	1	Kunming	Yunda	5	5	5	5	5	5	5	5	5	5	5	5	5	5	5	4	5	5	5	5	4	4	5	5	5	5	4	5	5	5	3	5	5	5	3	4	4	4	4	5	5	3	5
357	1	9	1	Xishuangbanna	Yixiao	5	4	5	4	5	5	5	5	5	5	5	5	4	5	5	4	5	5	5	5	5	5	5	5	4	4	4	5	4	4	1	5	5	5	5	5	5	5	5	5	4	4	4
358	1	9	0	Xishuangbanna	Changle	3	2	5	5	4	4	5	4	3	2.75	3	5	5	2	5	5	1	1	1	4	3	4	2	1.5	1	5	5	2	4	4	1	5	3	2.25	1	4.25	5	5	3	4	5	1	5
359	0	9	0	Kunming	Zhugou	5	4	5	4	5	4	4	4	4	5	5	4	5	4	5	3	5	1	3	3	2	5	2	5	1	1	5	4	5	1	4	5	1	2	1	5	5	5	5	2	4	4	5
360	1	9	0	Kunming	Zhugou	5	2	1	3	5	5	3.75	2	3	4	4	1	5	5	4	1	3	2	5	1	5	1	4	3	2	5	5	5	1	1	5	1	1	5	5	5	1	5	2	1	5	1	1
361	1	9	0	Kunming	Zhugou	3	1	5	5	4	2	4	4	3	5	5	3	5	3	4	3	5	2	5	3	4	2	5	4	3	5	5	4	2	3	5	5	1	4	5	5	5	2	4	5	3	5	4
362	1	9	0	Xishuangbanna	Changle	3	3	2	5	2	4	4	4	4	4	2	4	4	3	4	2	1	2	3	5	1	5	2	5	1	5	5	1	5	3	4	1	5	5	3	3	2.75	1	5	5	2	1	2
363	1	9	0	Kunming	Erjie	3	5	5	5	5	4	3	3	1	5	5	5	3	3	3	3	4	3	2	3	3	2	4	1	2	3	5	3	2	1	3	4	2	3	3	4	3	4	2	2	4	3	4
364	1	9	0	Xishuangbanna	Changle	5	5	5	5	4	5	5	5	4	5	3	4	5	3	4	3	4	3	4	3	3	4	3	3	3	4	5	5	5	5	5	5	5	5	5	5	5	5	5	5	5	5	5
365	1	9	1	Kunming	Yunda	5	4	5	5	5	4	5	5	3	3	5	3	5	3	4	3	5	3	5	5	2	5	2	5	1	1	5	5	3	4	3	5	4	3	1.25	5	3.5	5	5	5	5	3	2
366	1	9	0	Xishuangbanna	Erxiao	5	4	5	5	3	2	4	5	4	5	3	5	4	3.5	4	3	4	3.75	4	5	4	3.75	5	1	5	2	5	3	3	5	2	3.75	4	5	4	5	3.5	5	3	4.5	3.75	5	4.75
367	1	9	0	Kunming	Zhugou	3	5	5	1	5	4	3	3	3	2	4	4	3	1	2	4	4	4	5	3	1	3	2	1	5	4	5	1	5	1	3	4	5	3	1	1	1	1	4	3	1	5	2
368	0	9	1	Xishuangbanna	Shiji	4	5	5	5	5	4	4	5	5	5	4	5	4	5	5	5	4	4	5	3	2	5	4	2	1	1	5	5	2	1	1	4	3	5	1	2	2	2	2	5	5	1	4
369	0	9	0	Kunming	Erjie	3	5	5	5	5	5	3	5	5	3	5	3	3	2	4	4	3	4	5	5	5	4	1	3	1	3	5	2	1	1	1	4	2	5	1	3	3	2	4	2	1	2	2
370	1	9	0	Kunming	Erjie	4	5	5	5	3	3	3	4	4	5	5	3	5	3	4	5	3	4	4	4	4	5	4	3	4	2	5	5	4	3	2	5	5	1	1	4	3	4	2	5	3	5	5
371	1	9	0	Kunming	Zhugou	4	5	5	5	5	2	3	5	3	5	5	5	5	5	5	4	5	4	5	5	4	2	4	3	3	2	5	5	1	1	2	5	1	4	1	3	4	3	3	5	2	4	3
372	1	9	0	Kunming	Zhugou	4	4	4	5	5	5	4	4	4	4	4	5	4	4	4	4	4	4	5	3	4	4	4	4	3	3	5	4	3	1	2	4	4	5	1	3	3	2	4	5	2	3	4
373	1	9	1	Kunming	Lianhua	5	5	5	5	5	5	4	5	5	5	5	5	5	3	4	4	4	4	4	4	4	4	4	4	4	4	5	5	5	3	4	4	5	5	5	4	5	5	4.75	5	5	5	3
374	1	9	1	Kunming	Wuhua	4	5	5	4	4	4	3	5	5	5	4	4	5	4	4	5	5	4	5	5	4	5	4	4	4	4	5	5	2	1	1	3	3	3	1	3	3	3	2	2	2	2	2
375	1	9	0	Xishuangbanna	Zhongxin	4	5	5	5	4	5	5	5	4	5	4	5	4	4	5	4	5	4	5	5	4	4	5	4	4	5	5	4	5	5	4	4	5	4	5	3	5	3	3	5	4	5	4
376	0	9	1	Xishuangbanna	Yixiao	5	4	5	5	5	5	4	5	4	4	5	4	4	4	5	4	5	4	5	4	4	5	4	4	4	4	5	4	4	5	3	5	5	4	3	5	4	4	5	4	5	4	5
377	0	9	0	Kunming	Zhugou	4	5	4	5	5	5	4	5	4	5	5	4	5	5	4	4	5	4	4	4	5	5	3	5	3	3	5	3	5	1	3	5	2	5	2	4	2	2	4	5	5	2	2
378	0	9	0	Kunming	Erjie	5	5	5	4	5	4	4	4	3	3	4	3	4	2	3	3	4	5	5	2	2	3	4	2	1	5	5	3	4	2	3	5	1	5	3	3	3	2	4	3	5	2	5
379	1	9	0	Kunming	Erjie	3	5	4	4	5	4	2	2	5	4	5	3	5	3	5	5	4	5	5	2	2	3	5	2	1	1	5	3	3	3	3	4	4	2	1	2	2	4	5	3	4	2	4
380	1	9	0	Kunming	Zhugou	5	5	5	4	5	5	4	4	5	4	5	4	4	3	5	4	4	5	5	2	1	4	2	2	4	5	5	3	4	1	2	3	1	5	2	3	3	2	3	3	4	4	4
381	1	9	1	Hangzhou	Fenghuang	5	5	5	5	5	5	5	5	5	5	5	5	5	4	4	2	5	5	3	4	2	5	3	3	2	1	5	5	5	5	2	5	5	5	5	5	5	5	5	5	5	5	5
382	0	9	1	Hangzhou	Shengli	5	5	5	5	5	5	5	5	5	5	5	5	5	5	5	3	5	5	5	3	3	5	5	3	2	2	5	4	5	1	2	5	2	5	2	5	5	5	5	2	5	2	5
383	0	9	0	Kunming	Zhugou	4	5	5	4	5	5	3	4	3	5	5	5	5	3	5	2	4	5	5	2	1	2	4	3	2	1	5	3	2	1	2	4	5	2	1	5	5	3	2	2	1	5	5
384	0	9	1	Kunming	Wuhua	3	4	5	5	5	4	5	5	5	5	5	5	5	4	5	5	4.25	5	4	5	4	4	5	3	3	4	5	5	5	5	4	5	5	5	5	5	5	5	5	5	5	5	5
385	0	9	1	Kunming	Yunda	5	3	5	4	4	4	4	5	3	5	5	5	5	4	5	5	4	5	4	2	2	4	5	3	4	3	5	5	5	3	4	5	5	4	4	5	5	4	5	5	4.25	5	2
386	1	9	1	Kunming	Lianhua	1	1	5	5	5	5	5	1	1	1	5	1	5	5	5	5	5	5	5	4	5	5	5	3	4	1	5	3	5	5	1	5	1	3	4	2	3	5	3	2	3	4	5
387	1	9	1	Xishuangbanna	Shiji	5	5	5	5	5	5	5	5	4	5	5	2	5	5	5	2	4	5	4	5	3	5	5	3	1	5	5	5	2	2	2	5	1	5	5	1	3	3	2	5	5	5	5
388	0	9	1	Hangzhou	Shengli	5	5	5	4	5	4	5	5	5	5	5	5	5	4	4	3	4	5	3	2	4	5	5	4	2	2	5	5	5	3	1	5	4	5	4	3	3	4	3	5	2	4	2
389	0	9	1	Hangzhou	Fenghuang	5	5	5	5	5	4	5	5	5	5	5	5	5	4	4	4	5	5	5	5	4	3	5	4	3	4	5	5	5	3	3	5	5	5	5	5	5	5	5	5	5	5	5
390	1	9	1	Kunming	Yunda	4	5	5	4	5	5	4	5	5	4	4	3	4	3	4	3	5	5	4	3	2	4	4	4	4	4	5	5	5	5	3	5	5	5	5	5	5	5	5	5	5	5	5
391	0	9	0	Xishuangbanna	Erxiao	5	5	5	5	5	5	5	5	5	4	4	4	5	5	5	4	5	5	3	4	5	4	5	4	5	5	5	5	5	5	5	5	2	4	5	5	5	4	5	5	4	4	5
392	0	9	1	Xishuangbanna	Yixiao	5	5	5	5	5	5	4	4	4	3	3	5	5	3	4	2	4	5	4	2	3	4	4	4	3	3	5	5	5	5	3	5	4	3	4	3	3.75	3	5	5	3	4	4
393	1	9	1	Hangzhou	Fenghuang	5	5	5	4	5	4	5	5	5	5	5	5	4	5	5	5	5	5	5	5	5	5	5	5	5	5	5	5	5	5	1	5	5	5	5	4	4	4	5	4	4	5	5
394	0	9	1	Hangzhou	Shengli	5	5	5	4	5	4	5	4	5	5	5	4	5	4	5	2	5	5	3	3.5	5	5	5	5	1	5	5	4	4	1	1	5	1	5	1	3	3.25	2	5	4	4	4	3
395	1	9	1	Hangzhou	Fenghuang	5	5	5	5	4	5	5	5	3	5	5	5	5	5	5	3	5	5	4	2	5	5	1	5	2	2.25	5	3	5	1	2	5	3	5	1	3	2	3	3	5	5	3	5
396	0	9	1	Kunming	Yunda	4	5	5	4	5	3	5	5	5	5	5	5	4	3	3	3	4	5	3	2	1	2	3	5	1.75	1.75	5	2	5	3	3	4	2	3	2	2	2	2	4	3	4	2	3
397	1	9	1	Kunming	Wuhua	4	5	5	5	5	5	5	5	5	5	3	1	5	4	5	5	4	5	5	5	5	5	5	5	5	5	5	5	5	1.75	4	5	2	5	1	5	5	5	5	5	5	5	5
398	1	9	1	Kunming	Yunda	4	5	4	5	5	5	4	5	5	3	5	4	5	4	5	4	5	5	5	4	3	5	4	5	5	5	5	5	5	5	3	5	4	5	4	5	5	4	4	4	3	5	5
399	0	9	0	Xishuangbanna	Changle	1	1	5	5	5	3	3	2	5	1	1	1	5	1	3	2	5	5	1	5	2	1	5	5	1	1	5	5	1	5	4	1	2.75	1	5	1	5	1	5	5	1	2	1
400	1	10	0	Xishuangbanna	Changle	5	1	1	4	4	1	5	5	5	5	5	4	1	3	2	2	2	1	2	1	2	3	2	1	1	1	1	2	1	3	3	2	3	3	2	2	3	3	3	2	3	3.5	3
401	1	10	0	Xishuangbanna	Erxiao	3	2	4	4	4	4	4	4	4	4	4	1	1	1	2	1	1	1	1	1	1	1	1	1	2	1	1	1	2	1	5	1	1	1	1	2	1	1	2	3.5	2	2	2
402	1	10	0	Hangzhou	Nanshan	1	1	5	2	5	5	5	5	3	4	5	1	3	3	2	1	4	2	4	1	1	3	1	1	1	1	1	2	3	1	1	2	1	1	1	2	1	1	1	3	1	3	1
403	0	10	1	Kunming	Wuhua	5	4	4	4	4	1	3	5	4	3	4	2	4	3	2	4	1	2	3	1	1	1	2	1	1	2	1	1	3	1	1	1	1	3	1	3	1	1	3	3	1	3	1
404	1	10	1	Kunming	Wuhua	5	2	4	2	4	5	1	5	3	1	4.25	3	3	4	5	3	5	2	1	5	1	1	3	1	1	1	1	1	2	1	3	1	3	1	1	2	2	1	1	1	1	1	5
405	0	10	1	Xishuangbanna	Yixiao	4	5	5	4	5	5	3	4	3	3	2	1	3	3	5	1	1	2	4	1	1	4	2	1	1	1	1	2	5	5	2	5	1	5	2	4	4	4	4	5	5	2	5
406	0	10	0	Kunming	Erjie	4	4	4	4	4	4	4	3	4	3	4	3	4	3	4.5	2	2	2	2.75	2	2	2	2	1.75	2	2	1	1	3	1	1	4	2	1	1	1	3	1	1	3	2	1	1
407	0	10	0	Kunming	Zhugou	5	2	5	5	5	5	5	5	5	5	5	5	5	5	5	5	4	2	5	3	2	3	2	4	4	3	1	5	5	2	2	5	2	5	4	5	5	5	5	5	5	5	5
408	1	10	1	Kunming	Wuhua	4	4	5	3	5	5	1	5	4	4	5	4	5	3	5	2	4	2	5	2	1	4	1	5	1	1	1	4	1	1	5	4	1	2	2	1	1	1	1	2	3	2.5	3.25
409	1	10	0	Xishuangbanna	Erxiao	4	3	4	5	4	4	3	4	5	3	3	3	3	3	4	4	4	2	1	3	3	4	4	5	4	5	1	3	2	2	2	2	3	3	2	4	2	3	4	5	3	3	5
410	0	10	0	Kunming	Zhugou	4	2	5	3	4	2	1	4	5	4	3	2	3	3	4	2	3	2.75	3	1	1	2	1	1	1	1	1	2	3	1	3	2	1	2	1	1	2	3	2.5	1	1	2	1
411	0	10	0	Kunming	Erjie	4	5	4	3	4	4	4	3	3	4	5	5	4	4	2	3	2	3	3	3	1	2	4	1	1	1	1	4	3	1	1	4	2	2	1	2	2	2	1	2	2	1	1
412	0	10	0	Kunming	Zhugou	4	5	4	5	5	4	4	4	3	2	4	3	4	2	3	2	2	3	3	1	1	1	2	1	1	1	1	1	2	1	5	1	1	1	1	1	1	1	1	1	2	1	1
413	0	10	0	Kunming	Zhugou	4	3	5	5	3	5	3	5	5	3	3	4	5	4	4	3	4	3	4	1	1	1	3	1	1	3	1	3	2	1	3	4	3	1	3	2	1	1	4	3	1	5	3
414	0	10	1	Kunming	Lianhua	5	5	5	5	5	5	5	5	5	5	5	5	5	2	3	1	4	3	2	4	1	1	3	1	1	1	1	4	5	1	3	5	5	3	1	5	5	5	5	4	2	2	3
415	0	10	1	Kunming	Yunda	2	4	5	5	5	5	3	4	1	5	5	1	5	2	2	5	4	3	2	1	2	1	4	1	1	1	1	5	5	5	2	5	1	5	1	5	5	5	5	5	5	5	5
416	0	10	1	Kunming	Yunda	4	4	5	4	4	3	4	4	4	5	5	5	4	3	4	4	3.75	3	5	1	1	2	3	1	3	3	1	3	2	5	3	4	1	2	2.25	2	3	2	4	5	5	1	2
417	1	10	1	Kunming	Wuhua	5	5	5	3	3	3	2	2	2	2	2	4	4	3	4	3	3	3	3	2	1	1	1	1	1	1	1	2	4	1	3	2	1	3	1	4	4	4	4	3	2	1	1
418	1	10	0	Xishuangbanna	Zhongxin	4	2	3	1	4	2	5	3	4	4	2	3	3	3	2	3.5	4	3	4	1	2	3	2	1	2	1	1	3	4	1	3	2.75	3	2	3	3	5	2	3.25	3	2	3	2
419	1	10	1	Xishuangbanna	Shiji	4	4.5	5	3	5	5	4	4	5	4	5	4	5	3	4	2	4.25	3	2	3.5	1	2	2	1	1	1	1	2	2	1	1	4	2	2	1	2	2	1	2	2	2	3	3
420	0	10	0	Hangzhou	Nanshan	5	5	5	5	4	5	4	3	5	3	5	4	5	3	4	2	4	3	5	3	2	2	4	2	1	1	1	2	4	1	5	5	2	3	1	2	3	3	2	3	5	3	3
421	0	10	1	Hangzhou	Fenghuang	4	5	4	4	5	5	4	4	5	4	5	3	3	4	5	2	5	3	5	2	2	3	3	2	1	1	1	5	4	1	3	5	1	3	2	4	4	4	4	4	4	3	3
422	1	10	1	Hangzhou	Cuiyuan	5	3	3	3	5	3	3	3	4	5	5	5	4	2	3	4	2	3	5	2	2	2	3	2	1	1	1	3	5	1	1	3	1	3	2	5	5	5	5	3	2	2	2
423	0	10	1	Kunming	Lianhua	3	4	5	5	5	4	3	5	5	4	5	4	4	3	4	3	4	3	2	5	2	3	5	2	1	2	1	5	5	5	3	5	1	4	1	4	4	4	4	3	2	2	5
424	0	10	1	Kunming	Wuhua	4	5	5	5	2	3.75	3	4	5	4	3	3.25	4	3	4	2	3	3	3	2	1	3	3	2	2	3	1	2	3	2	3	3	1	2	1	2	2	2	3	3	3	2	4
425	1	10	1	Kunming	Wuhua	5	5	5	5	5	5	4	5	4	3	5	3	5	3	4	4	4	3	3	5	3	2	4	2	1	2	1	3	5	1	5	5	1	4	1	4	2	4	2.75	3	2	1	4
426	0	10	0	Xishuangbanna	Zhongxin	5	3	4	3	5	4	5	5	5	4	5	2	5	3	5	4	5	3	5	5	4	3.25	2	2	3	4	1	5	4	1	5	3	3	5	1	3	5	2	3.5	3	5	4	3
427	1	10	0	Xishuangbanna	Zhongxin	3	4	5	4	5	5	5	3	4	3	4	2	4	3	4	2	3	3	4	3	1	2	3	2	1	1	1	2	3	1	1	3	2	3	2	4	4	4	1	2	2	1	3
428	0	10	1	Xishuangbanna	Shiji	5	4	5	4	4	4	5	4	3	3	5	3	3	3	4	3	5	3	5	2	2	2	3	2	2	3	1	3	2	1	4	5	1	2	1	3	2	3	2	4	2	3	5
429	0	10	1	Kunming	Wuhua	4	5	5	4	5	5	4	3	4	5	5	4	4	4	3.75	3	4	3	4	2	2	2	3	2.25	1	1	1	3	4	1	3	5	1	1	1	5	5	5	5	5	5	4	4
430	0	10	0	Kunming	Erjie	5	5	5	5	5	5	4	3	5	4	5	4	5	3	4	2	4	3	1	3	1	2	4	2.75	2	2	1	5	5	1	1	5	2	3	1	2	2	2	3	3	2.5	4	4
431	0	10	1	Hangzhou	Shengli	4	3	4	5	5	4	4	4	5	3	5	3	5	3	4	3	5	3	5	3	1	1	2	3	1	1	1	3	3	1	3	5	2	1	1	2	2	2	2	4	2	2	2
432	0	10	1	Hangzhou	Cuiyuan	4	5	5	3	4	4	5	4	4	3	4	4	5	3	4	5	5	3	3	2	1	3	4	3	1	1	1	4	5	1	2	3	2	2	1	5	5	5	5	5	4	2	4
433	1	10	0	Kunming	Erjie	3	5	5	5	4	5	3	5	4	3	4	4	5	4	5	4	5	3	5	2	3	5	4	3	4	4	1	5	4	1	3	1	5	1	1	3.25	5	3	2	2	3	5	5
434	0	10	0	Xishuangbanna	Zhongxin	4	3	5	3	4	5	5	4	4	3	3	5	4	3	4	2.5	4	3	4	2	1	2	2	3	1	1	1	4	1	1	1	4	3	5	5	3	4	1	1	3	3	4	5
435	0	10	1	Hangzhou	Shengli	5	4	5	3	4	4	4	3	4	2	4	4	3	2	3	2	2	3	2	4	2	2	5	4	1	1	1	5	5	1	4	5	1	2	2	2	2	3	3	2	2	3	3
436	0	10	1	Kunming	Lianhua	5	5	5	5	5	5	5	5	5	5	5	5	5	4	3	4	4	3	5	3	2	4	5	4	1	3	1	4	4	3	3	3	3	3	2	3	3	3	3	3	3	3	3
437	0	10	0	Xishuangbanna	Erxiao	4	5	5	4	5	4	4	4	5	5	4	3	3	4	4	5	5	3	5	4	3	4	3	4	2	3	1	4	4	2	3	4	1	5	2	3	3	4	2	3	3	4	3
438	0	10	0	Hangzhou	Nanshan	5	5	5	5	5	4	4	3	3	3	4	4	4	3	3	1	2	4	2	1	1	3	2	1	1	1	1	3	5	1	2	1	1	2	1	3	2	3	2	2	2	3	2
439	1	10	0	Hangzhou	Nanshan	1	5	5	4.5	5	2	3	3	3	2	3	1	5	2	2	2	1	4	4	1	1	1	1	1	1	1	1	1	4	1	3	1	1	1	3	2	2	2	2	1	4	1	1
440	0	10	1	Hangzhou	Cuiyuan	5	5	5	5	5	5	5	5	5	4	5	1	5	2	4	4	4	4	5	2	2	2	5	1	1	1	1	1	1	1	4	1	1	2	2	1	1	2	1	2	1	1	2
441	1	10	1	Hangzhou	Cuiyuan	5	5	5	5	5	5	5	5	5	5	5	5	5	2.25	3	1	1	4	3	3.5	1	2	1	1	1	1	1	1	2	1	1	1	2	1	2	2	2	2	2	2	2	2	2
442	0	10	0	Kunming	Erjie	3	5	5	4	5	4	4	3	4	5	5	1	5	5	5	4	3	4	2	3	5	2	4	1	1.5	3	1	3	1	1	1	4	2	4	1	1.75	3	1	3	3	4	2	3
443	0	10	0	Kunming	Erjie	4	5	5	5	5	5	3	4	5	5	4	1	5	4	3.25	3	4	4	3	1	1	4	2	1	1	1	1	3	3	1	2	3.75	2	3	1	2.75	2	1	3	3	4	3	3
444	1	10	1	Kunming	Lianhua	3	4	5	3	4	4	4	4	3	3	2	3	3	2	3	2	3	4	2	3	1	1	1	1	1	1	1	2	3	1	4	2	1	2	1	4	1	3	2	3	3	1	1
445	0	10	0	Xishuangbanna	Zhongxin	4	3	5	5	5	4	5	4	4	3	5	4	4	2	5	2	2	4	4	2	1	2	3	1	1	1	1	4	1	1	5	1	1	2	1	3	2	1	2	2	1	1	3
446	0	10	1	Xishuangbanna	Shiji	5	5	5	5	5	4	5	2	2	5	3	3.75	3	4	5	3	3	4	5	1	1	1	1	1	1	1	1	2	1	1	2	1	1	1	3	3	3	1	3	3	2	1	2
447	0	10	1	Hangzhou	Shengli	5	5	5	3	4	3	5	5	5	5	5	3	3	3	4	2	4	4	3	3	2	1	2	2	1	1	1	3	3	1	4	4	2	2	2	1	1	3	3	2	3	1	1
448	0	10	0	Kunming	Erjie	4	3	4	4	5	4	4	3	4	4	5	3	5	3	4	3	5	4	3	3	2	3	2	2	1	1	1	2	3	1	3	4	2	3	1	3	2	1	2	3	2	2	3
449	0	10	0	Kunming	Erjie	4	5	5	5	5	5	5	5	5	4	5	4	5	4	3	4	4	4	3	3	3	2	2	2	1	1	1	2	3	2	3	3	1	2	2	3	1	1	1	3	3	3	2
450	0	10	0	Kunming	Zhugou	5	1	3	3	3	4.25	3	4	3	3	4	4	5	2	5	3.25	4	4	5	2	2	4	2	2	2	2	1	2	2	2	3	2	2	2	1	2	2	2	2	2	2	2	4
451	1	10	0	Kunming	Erjie	2	1	4	3	2	4	2	2	3	1	4	3.5	2	3	3	3	2	4	3	3	2	4	1	2	5	3	1	2	3	1	2	2	4	3	1	4	2	1	4	4	3	3	2
452	1	10	0	Kunming	Zhugou	4	3	5	4	5	4	4	5	4	5	5	3	4	2	4	5	4.25	4	4	3	2	3	2	2	2	2	1	2	2	2	3	2	2	2	2	2	2	2	2	2	2	2	2
453	0	10	1	Kunming	Lianhua	5	5	5	5	5	5	5	5	5	5	5	5	5	3	3	3	4	4	2	2	3	2	2	2	1	1	1	4	3	1	2.25	5	1	3	1	3	3	3	3	3	3	3	2
454	1	10	1	Kunming	Wuhua	5	5	5	5	5	4	3	4	3	5	4	4	5	3	4	1	5	4	4	4	3	4	2	2	1	1	1	2	1	1	3	2	1	4	2	2	2	2	2	2	2	2	3
455	0	10	0	Xishuangbanna	Zhongxin	5	5	4	5	5	4	5	4	5	3	4	4	5	3	5	4	4	4	5	2	2	5	3	2	4	5	1	5	3	1	4	4	3	3	4	4	4	4	3	3	3	4	4
456	1	10	0	Xishuangbanna	Changle	5	2	5	3	5	3	5	5	4	5	3	4	5	3	4	3	4	4	3	3	2	2	4	2	1	2	1	3	4	2	2	2	2	5	5	2	4	4	3	2	5	4	3
457	1	10	1	Xishuangbanna	Shiji	3	4	3	2	4	4	5	4	3	4	2	3	5	2	1	3	4	4	4	2	2	3	4	2	5	4	1	3	1	1	3	2	2	4	1	2	3	2	2	1	2	1	2
458	1	10	1	Kunming	Wuhua	5	5	4	3	4	5	3	3	5	5	3	2	5	5	4	3	5	4	5	3	2	2	4	2.25	3	5	1	2	3	4	3	3	4	3	3	3	5	2	3.5	3	5	1	3
459	1	10	1	Hangzhou	Shengli	5	5	4	5	5	5	4	4	3	4	5	5	5	1	3	1	4.25	4	3	3	1	3	2	2.5	1	1	1	2	2	2	3	1	1	3	1	3	3	3	3	4	4	1	2
460	0	10	0	Hangzhou	Nanshan	4	4	4	4	4	5	5	5	4	5	4	4	5	4	3	4	4	4	5	3	3	3	4	3	1	3	1	4	3	1	2	3	2	4	2	3	3	3	3	4	3	3	4
461	0	10	1	Hangzhou	Shengli	5	5	5	5	5	5	4	3	4	4.25	5	1	5	3	4	3	4	4	4	5	2	2	4	3	1	1	1	3	4	2	5	3	1	4	1	5	5	4	4	4	4	5	3
462	0	10	1	Hangzhou	Fenghuang	4	3	5	5	5	5	5	4	5	4	5	4	5	4	4	2	3	4	3	3	2	2	4	3	1	1	1	4	3	1	5	3	1	3	1	3	3.25	3	2	3	2	3	3
463	1	10	0	Kunming	Erjie	4	2	4	4	4	4	4	4	4	4	4	4	4	3	4	4	4	4	4	3	4	4	3	3	1	1	1	4	3	1	3	4	1	4	2.25	3	2.5	3	3	4	3	3	3
464	1	10	0	Kunming	Zhugou	5	4	4	4	5	4	4	4	4	5	4	4	5	4	5	4	5	4	3.75	5	4	5	4	3	4	4	1	4	1	1	3	4	1	4	1	2	3	5	4.25	5	4	4	5
465	0	10	1	Kunming	Wuhua	4	5	5	5	5	5	4	4	5	3	5	5	5	3	5	5	3	4	4	3	2	2	5	3	2	2	1	3	2	1	2	5	5	5	1	5	5	5	5	5	3.75	4.25	2
466	1	10	1	Kunming	Wuhua	5	5	5	5	5	5	5	5	5	5	5	5	5	2	3	4	5	4	4	2	2	3	3	3	3	1	1	3	3	1	1	4	1	3	1	4	4	3	3	4	2	2	4
467	1	10	0	Xishuangbanna	Erxiao	5	5	4	5	5	4	4	5	4.25	4	4	5	5	3	5	2	4	4	3.25	3	2	4	2	3.5	3	5	1	3	1	1	3	4	2	3	2	4	5	3	5	2	4	5	2
468	0	10	1	Kunming	Yunda	4	5	5	5	5	5	5	4	4	3	5	4	3	3	4	2	2	4	3	1	1	4	1	3.75	1	1	1	3	5	2	3	4	1	3	1	4	4	1	3	3	5	2	1
469	1	10	1	Hangzhou	Shengli	5	5	5	5	5	5	5	5	5	5	5	5	5	5	5	4	5	4	4	5	2	2.5	2	4	3	3	1	2	4	1	5	5	1	4	2	3	3	4	3	5	5	2	4
470	0	10	0	Kunming	Erjie	4	2	5	4	5	3	5	3	4	3	5	4	4	3	4	2	2	4	5	3.5	1	2	3	4	2	4	1	3	5	2	5	3	4	2	5	3	2	4	1	1	3	4	5
471	0	10	0	Xishuangbanna	Erxiao	3	3	4	4	5	4	5	4	3	4	1	3	5	3	4	3	3	4	4	3	2	4	3	4	3	3	1	4	2	1	1	2	2	2	1	3.5	2	2	2	3	2	3	4
472	1	10	0	Xishuangbanna	Erxiao	5	5	4	5	5	5	2	4	5	5	5	1	4	4	4	3	4	4	3	3	3	4	4	4	2	4	1	5	2	1	1	4	4	4	1	4	4	4	4	4	4	4	4
473	0	10	0	Hangzhou	Nanshan	5	5	5	4	5	5	5	5	5	5	5	4	5	4	4	5	5	4	5	3	2	5	5	5	1	1	1	5	5	5	4	5	5	5	4	5	5	5	5	5	5	5	5
474	1	10	0	Hangzhou	Lijia	5	5	5	4	5	4	5	4	4	4	3	3	5	3	3	4	5	4	3	2	3	3	4	5	2	3	1	4	5	1	5	3	1	3	1	4	3	2	1	5	5	5	5
475	1	10	1	Hangzhou	Shengli	5	5	5	5	5	5	5	5	4	5	5	4	5	2	5	5	5	4	5	1	1	4	3	5	1	1	1	5	5	1	5	4	1	5	1	2	3	3	2	5	5	3	5
476	0	10	0	Kunming	Zhugou	4	5	5	5	5	5	5	5	5	4	5	5	5	4	5	4	5	4	5	5	3	5	5	5	3	4	1	5	4	1	5	5	4	5	3	5	5	5	4	5	4	5	4
477	0	10	0	Kunming	Zhugou	5	5	5	4	5	4	5	5	5	4	3	3	5	4	5	5	5	4	5	4	3	5	4	5	3	3	1	5	3	2	4	5	1	5	3	5	5	3	5	4	3	3	5
478	1	10	1	Kunming	Lianhua	5	5	4	5	5	5	5	3	4	3	5	4	5	4	5	3	5	4	3	4	2	5	3	5	1	2	1	2	5	2	5	5	3	4	2	5	5	3	4.25	3	2	4	4
479	1	10	0	Xishuangbanna	Changle	5	4	5	5	5	5	4	5	5	5	5	4	5	3	5	5	5	4	4	5	4	4	5	5	5	5	1	5	4	1	2	5	1	5	3	5	5	5	5	5	4	5	5
480	1	10	1	Hangzhou	Shengli	1	5	4	3	2	5	3	2	5	1	1	1	3	3	2	1	5	4.5	2	1	1	2	4	1	1	1	1	4	3	1	2	1	1	3	1	3	3	3	1	3	1	1	1
481	1	10	0	Xishuangbanna	Erxiao	5	5	5	5	5	5	5	5	4	4	5	5	3	2	5	5	2	4.5	3	1	2	1	1	1	1	1	1	1	2	1	1	2	1	3	4	1	1	1	2	2	2	3.75	1
482	1	10	0	Kunming	Zhugou	5	5	5	5	4	4	4	4	5	4	5	5	5	4	4	4	5	4.5	4.25	3.25	3.75	1	2.75	3.5	3	1	1	3	5	1	4	5	1.25	3	1	1.75	2	2	2	2	4	5	2
483	1	10	1	Kunming	Wuhua	5	5	5	5	5	5	4	5	4	4	4	4	4	5	4	5	4	4.75	4	4	4	5	4	5	3	1	1	5	4	2	1	4	2	3	1	5	3	2	4	3	4	3	5
484	1	10	0	Hangzhou	Nanshan	5	4	5	5	5	5	4	5	5	5	5	5	5	3	3	5	5	5	3	3	1	2	5	1	1	1	1	3	4	3	4	2	3	5	3	2	2	2	1	3	4	3	3
485	0	10	1	Hangzhou	Cuiyuan	4	5	5	5	5	5	4	5	5	3	5	5	5	2	3	1	3	5	3	5	1	3	1	1	1	1	1	4	4	1	2	5	3	3.75	5	3	5	5	5	5	5	1	2
486	1	10	1	Hangzhou	Fenghuang	4	5	5	3	5	3	4	1	1	1	1	1	3	3	3	3	5	5	5	1	1	2	1	1	1	1	1	1	5	5	2	2	1	2	1	5	4	4	3	3	4	2	1
487	0	10	0	Kunming	Erjie	5	5	4	4.5	5	4	3	3	4	4	4.5	3	5	3	4	2	2	5	2	3	2	2	4	1	1	1	1	3	4	1	5	4	1	1	1	3	1.25	1	2.25	1	1	2	5
488	0	10	0	Kunming	Erjie	4	5	5	4	5	4	3	4	4	3	4	3	4	3	4	2	4	5	2	4	2	3	1	1	1	1	1	2	3	1	2	3	1	1	5	2	1	1	1	2	3.25	2	1
489	0	10	0	Kunming	Erjie	5	5	5	5	5	5	4	5	5	4	5	2	5	3	4	2	3	5	4	2	1	3	2	1	1	1	1	2	1	1	2	3.75	1	2	3	4	2	1	2	2	3	2	2.75
490	0	10	0	Kunming	Zhugou	5	2	5	5	4	5	3	5	3	4	3	5	4	4	5	3	4	5	5	2	3	3	4	1	3	1	1	4	2	2	1	5	5	5	3	2	1	1	1	4	4	4	4
491	0	10	0	Kunming	Zhugou	5	5	5	5	5	5	5	5	5	5	5	5	5	3	5	2	1	5	4	1	1	4	1	1	1	1	1	2	4	1	4	3	2	5	2	2	1	1	1	2	3	2	1
492	1	10	0	Kunming	Zhugou	5	5	5	4	4	5	1	1	4	5	5	4	4	2	3	2	4	5	3	2	1	1	1	1	1	1	1	3	3	2	1	1	1	1	2	1	1	1	2	1	1	1	1
493	0	10	1	Kunming	Lianhua	4	5	5	5	5	5	5	5	4	4	5	5	5	3	5	2	2	5	4	5	5	5	3	1	1	1	1	4	4	1	2	1	2	4	1	3	3	2	2	5	4	1	5
494	0	10	1	Kunming	Lianhua	5	5	5	5	5	5	5	5	5	5	1	5	5	3	4	2	5	5	5	5	1	5	4	1	1	1	1	5	5	1	4	2	1	5	1	5	4	2	2	5	5	5	5
495	0	10	1	Kunming	Yunda	4	4	5	4	5	4	5	3	5	4	4	4	4	4	4	5	5	5	5	2	3	4	5	1	1	3	1	5	5	4	3	3	1	4	1	5	5	3	5	4	5	4	3
496	1	10	1	Kunming	Lianhua	5	5	5	4	4	3	5	5	5	5	3	4	5	2	5	3	5	5	5	5	5	5	3	1	1	1	1	4	4	3	3	2	1	5	3	5	5	5	5	5	5	1	5
497	1	10	1	Kunming	Yunda	5	5	5	5	5	5	4	3	3	4	4.5	4	4	4	5	2	4.5	5	5	5	1	3	5	1	1	1	1	5	4	1	2	5	1	5	1	4	5	5	5	5	5	5	4
498	0	10	0	Xishuangbanna	Changle	2	5	4	3	5	4	5	5	4	5	1	3	5	3	4	2	4	5	4	2	1	2	3	1	1	1	1	2	1	1	1	4	1	3	5	3	3	3	3	2	3	4	1
499	0	10	1	Xishuangbanna	Yixiao	4	5	5	4	5	4	4	4	4	3	3	5	5	3	3	3	4	5	2	5	2	2	2	1	1	1	1	2	2	1	5	3	1	2	2	4	4	4	4	3	3	3	2
500	1	10	1	Xishuangbanna	Shiji	5	5	5	4	4	3	2	5	4	5	2	2	1	2	5	1	2	5	5	5	1	1	1	1	1	1	1	1	3	1	5	1	1	1	1	1	1	1	2	3	1	1	1
501	0	10	0	Hangzhou	Nanshan	4	5	5	5	5	5	5	4	3	2	4	4	5	3	5	3	5	5	4	4	2	4	3	2	1	4	1	3	4	1	3	2	1	4	1	1	1	1	1	3	2	4	3
502	1	10	0	Hangzhou	Nanshan	4	4	4	5	4	4	5	5	4	3	3	3	5	3	4	2	5	5	4	2	1	2	3	2	1	2	1	3	4	1	1	5	2	3	1	4	3	3	4	4	3	2	3
503	0	10	1	Hangzhou	Shengli	5	5	5	5	4	5	3	5	5	4	5	4	5	3	4	5	3	5	4	3	1	2	4	2	1	1	1	5	5	1	2	3	1	2	1	2	2	2	2	2	4	1	1
504	0	10	1	Hangzhou	Cuiyuan	5	5	5	5	5	5	5	5	5	5	5	5	5	4	5	3	4	5	3	5	3	4	3	2	3	2	1	3	2	1	3	4	3	2	1	3	3	4	4	4	3	3	4
505	0	10	1	Hangzhou	Fenghuang	4	5	5	3	4	5	3	3	3	2	3	4	4	2	3	3	1	5	3	1	1	1	3	2	1	1	1	3	3	1	5	1	1	3	2	3	3	3	3	4	3	1	1
506	1	10	1	Hangzhou	Shengli	5	5	5	5	5	5	4	3	3	4	2	4	2	2	3	1	2	5	4	1	1	1	3	2	1	1	1	2	2	2	1	2	1	1	2	2	3	1	1	3	3	1	2
507	1	10	1	Hangzhou	Shengli	4	5	5	4	3	2	5	5	3	4	5	4	1	2	4	1	4	5	4	3	1	2	1	2	2	2	1	4	5	5	3	4	1	1	1	3	3	3	3	2	3	1	1
508	1	10	1	Hangzhou	Fenghuang	5	5	5	3	4	3	4	3	3	3	2	2	2	2	3	2	2	5	3	1	1	1	1	2	1	1	1	2	3	1	3	1	1	3	1	3	2	3	2	5	5	1	5
509	1	10	1	Hangzhou	Fenghuang	5	5	5	5	5	4	4	5	4	4	5	3	3	4	4	5	5	5	5	3	4	5	4	2	3	1	1	3	3	2	3	4	1	4	1	3	3	3	3	4	3	4	5
510	0	10	0	Kunming	Zhugou	4	3	5	5	4	3	3	3	4	5	4	3	4	3	5	4	5	5	4	3	2	4	3	2	4	3	1	3	4	1	3	3	1	4	2	2	1	2	3	2	3	4	5
511	1	10	0	Kunming	Zhugou	4	5	5	4	5	5	4	3	4	3	3	3	4	2	4	5	3	5	1	1	1	2	1	2	2	2	1	2	2	1	2	3	1	2	1	3	2	3	4	2	2	5	2
512	0	10	1	Kunming	Lianhua	5	5	5	5	4	4	3	5	5	4	3	5	5	3	2	1	3	5	3	5	1	3	2	2	1	1	1	3	4	2	2	3	2	1	1	1	3.25	2	2	3	3	5	2
513	1	10	1	Kunming	Wuhua	5	5	5	5	5	5	5	5	5	5	5	5	5	3	5	4	4	5	4	3	4	3	4	2	1	1	1	4	3	1	3	4	1	4	1	3	3	3	3	3	2	1	3
514	0	10	0	Xishuangbanna	Changle	5	1	5	5	4	4	3	4	3	4	2	3	5	2	5	3	2	5	5	2	3	3	4	2	1	1	1	4	2	2	4	3	1	2	2	1	5	2	1	2	1	5	3
515	0	10	0	Xishuangbanna	Changle	3	4	5	5	5	5	5	5	4	5	5	3	5	3	4	3	2	5	5	3	2	4	4	2	1	2	1	5	3	2	3	5	5	4	2	3	3.75	4	3	3	3	4	4
516	0	10	0	Xishuangbanna	Changle	3	5	5	5	5	5	4	4	4	5	5	2	4	4	4	2	4	5	3	3	2	4	2	2	4	4	1	3	3	1	3	4	1	4	2	3	4	3	2	3	3	5	3
517	0	10	0	Xishuangbanna	Zhongxin	5	5	5	5	5	5	5	4	5	4	4	5	4	3	5	3	4	5	5	4	2	5	4	2	3	2	1	5	2	1	5	4	2	5	2	4	3	2	2	5	4	5	4
518	1	10	0	Xishuangbanna	Zhongxin	4	1	5	4	5	4	5	4	5	2	2	1	5	1	1	2	5	5	5	3	2	3	4	2	3	4	1	5	1	1	1	2	1	4	1	1	5	3	4	1	3	3.5	1
519	0	10	1	Xishuangbanna	Shiji	5	4	5	5	5	5	4	5	4	4	4	2	5	3	4	5	3	5	4	3	5	5	5	2	2	2	1	5	1	1	3	2	1	3	2	5	5	2	2	5	5	5	2
520	0	10	0	Hangzhou	Nanshan	5	4	4	5	5	5	5	5	4	3	5	5	5	5	4	3	5	5	5	4	5	4	4	3	3	5	1	4	5	1	3	5	4	4	1	2	3	2	2	3	2	4	2
521	0	10	1	Hangzhou	Shengli	5	5	5	5	5	5	5	5	5	5	5	5	5	5	5	5	5	5	5	5	5	5	5	3	1	1	1	5	5	1	2	2	1	5	3	5	5	5	5	5	5	5	5
522	0	10	1	Hangzhou	Shengli	5	5	5	5	5	4	4	4	4	3	5	4	5	3	4	2	2	5	5	5	3	5	2	3	2	1	1	5	5	1	3	4	1	3	1	4	4	3	4	3	5	2	4
523	0	10	1	Hangzhou	Fenghuang	5	5	5	5	5	5	5	5	5	5	5	5	5	5	5	4	5	5	5	5	2	5	5	3	1	1	1	2	5	1	3	5	1	5	1	5	5	5	5	5	5	5	1
524	0	10	1	Hangzhou	Fenghuang	5	5	5	5	5	5	5	5	5	5	5	4	5	3	4	4	5	5	4	5	5	5	5	3	1	1	1	4	4	3	2	5	5	5	5	5	5	5	5	5	5	3	3
525	1	10	1	Hangzhou	Shengli	4	5	5	5	5	5	5	4	4	4	5	5	4	4	4	3	3	5	4	4	2	3	3	3	3	3	1	3	3	1	1	4	1	3	2	3	3	4	4	4	4.25	1.5	2
526	1	10	1	Hangzhou	Cuiyuan	5	5	5	5	5	5	5	5	5	5	5	5	5	5	5	5	5	5	3	5	5	5	3	3	1	1	1	3	4	1	5	4	4	4	2	2	2	2	2	4	5	2	2
527	0	10	0	Kunming	Erjie	5	5	5	5	5	5	5	3	5	3	5	3	3	3	5	5	3	5	5	3	3	3	5	3	3	3	1	3	4	4	3	5	2	5	2	3	3	4	2	4	2	5	2
528	0	10	0	Kunming	Erjie	3	4	4	4	4	4	2	4	4	3	4	3	4	3	5	3	5	5	4	4	1	3	1	3	1	1	1	3	1	1	3	4	1	3	2	3	3	3	2.5	3	3	3	2
529	0	10	0	Kunming	Zhugou	4	5	4	4	4	4	3	5	4	4	4	5	4	3	4	3	5	5	4	4	3	4	4	3	1	1	1	4	3	1	3.25	2	1	5	1	3	2	2	3	2	3	1	1
530	1	10	0	Kunming	Erjie	5	5	5	4	5	3	5	4	3	3	5	3	5	3	5	2	5	5	5	5	2	4	5	3	2	3	1	3	5	1	3	4	1	3	1	5	1.75	5	5	4.25	2	2	5
531	0	10	1	Kunming	Wuhua	5	4	5	5	5	5	3	5	5	5	5	5	5	4	4	4	5	5	5	5	4	5	5	3	3	4	1	5	5	2	3	5	5	5	2	5	5	2	5	5	4	5	3
532	0	10	1	Kunming	Wuhua	4	5	5	4	5	5	5	4	4	5	4	5	4	4	5	4	4	5	4	5	4	5	5	3	4	5	1	4	3	3	2	3.25	3	3	1	4	4	3	3	4	4	4	4
533	1	10	1	Kunming	Lianhua	5	5	5	5	5	5	5	5	5	5	5	5	5	5	5	5	5	5	3	5	1	3	3	3	3	3	1	2	1	1	5	1	1	1	1	2	2	2	1	2	2	2	2
534	1	10	1	Kunming	Lianhua	4	5	5	2	5	4	3	4	5	3	4	3	2	3	4	3	2	5	5	1	1	2	4	3	3	2	1	4	2	1	1	4	2	3	1	3	3	2	1	5	5	2	1
535	1	10	1	Kunming	Wuhua	5	5	5	5	5	5	5	4	3	4	5	3	4	4	5	2	4	5	5	3	3	2	3	3	1	1	1	3	3	1	2	5	1	3	1	3	3	3	3	5	5	1	5
536	1	10	1	Kunming	Yunda	5	5	5	5	5	4	5	4	4	4	5	5	5	2	2	2	3	5	2	2	1	1	1	3	1	1	1	2	2	2.25	5	5	2	4	1	3	1	2	4.75	3	1	1	2
537	0	10	0	Xishuangbanna	Changle	4	3	5	5	5	5	4	5	5	4	3	3	5	4	5	3	4	5	3	3	4	5	4	3	3	4	1	5	3	1	3	3	1	4	2	2	2	2	1	3	2	4	3
538	0	10	0	Xishuangbanna	Erxiao	5	3	4	5	5	5	5	3	4	3	4	3	4	4	5	2	5	5	5	3	1	3	4	3	1	1	1	3	2	1	3	3	1	3	1	2	2	2	2	4	4	5	3
539	0	10	0	Xishuangbanna	Erxiao	3	5	5	5	5	4	4	5	4	4	4	3	5	4	5	5	4	5	5	3.25	3	3.75	5	3	3.25	1	1	4	4	2.5	3	3	3	4.5	2	4	5	2	2.5	5	5	4	4
540	1	10	0	Xishuangbanna	Changle	4	5	5	3	5	4	3	3	5	3	4	1	5	2	5	4	5	5	5	3	2	2	4	3	3	2	1	5	3	2	5	4	2	5	1	3	4	2	1	3	4	3	5
541	1	10	0	Xishuangbanna	Erxiao	2	5	4.5	3	5	4.5	4	4	4	4	3	3	5	5	4	3	1	5	5	1	1	5	4	3	5	1	1	5	5	1	3	5	1	5	1	5	2	5	1	5	5	1	5
542	1	10	0	Xishuangbanna	Erxiao	4	4	4	5	5	5	4	4	4	4	4	5	5	2	4	3	3	5	5	3	4	2	4	3	4	4	1	2	1	1	2	4	3	4	3	2	3	1	1	3	4	2	3
543	1	10	1	Xishuangbanna	Shiji	4	3	5	4	4	4	5	5	3	5	5	3	5	3	5	4	5	5	5	3	5	4	5	3	3	3	1	5	3	1	3	5	3	5	2	4	4	4	3	5	5	5	4
544	1	10	1	Xishuangbanna	Yixiao	5	5	5	5	5	5	5	5	5	5	5	5	5	5	5	5	5	5	5	5	5	5	5	3	1	1	1	1	1	1	3	1	1	1	5	5	5	5	5	5	5	5	5
545	0	10	0	Hangzhou	Nanshan	5	5	5	4	5	5	4	5	5	4	5	4	5	3	4	3	5	5	3	2	2	2	5	4	1	2	1	5	4	1	5	4	1	3	1	3	3	3	3	4	2	5	4
546	0	10	0	Hangzhou	Nanshan	4	5	5	4	5	4	5	4	4	3	5	3	5	3	4	4	5	5	3	4	5	5	4	4	1	1	1	4	3	1	5	4	1	4	1	5	5	5	5	4	5	5	4
547	0	10	0	Hangzhou	Nanshan	5	5	5	4	5	4	5	5	5	4	5	4	4	4	4	4	5	5	4	1	3	5	5	4	1	1	1	4	5	1	4	5	1	4	3	4	4	4	5	4	4	5	5
548	1	10	0	Hangzhou	Nanshan	5	5	5	5	5	5	5	5	5	5	3	1	5	4	5	4	5	5	5	5	4	5	5	4	1	4	1	4	2	1	5	2	1	2	1	1	1	2	1	4	5	1	2
549	1	10	1	Hangzhou	Fenghuang	5	5	5	3	5	5	5	4	3	5	5	3	5	3	4	5	4	5	3	2	1	3	3	4	1	2	1	3	5	1	4	3	1	5	1	5	5	3	5	3	5	4	5
550	0	10	0	Kunming	Zhugou	1	5	5	5	5	5	5	5	5	4	1	1	5	4	5	4	4	5	1	1	1	1	1	4	2	1	1	4	3	1	5	1	1	3	1	3	1	3	2.5	4	4	3	4
551	1	10	0	Kunming	Zhugou	5	4	3	4	4	3	4	5	4	4	3	3	4	2	5	4	4	5	1	3	3	3	4	4	3	1	1	4	2	1	2	4	3	4	1	3	2	4	2	4	3	3	3
552	0	10	1	Kunming	Lianhua	5	5	5	5	5	5	5	5	5	5	5	5	5	4	4	4	5	5	4	5	2	2	4	4	1	1	1	3.75	3.75	1	3	5	1	2	1	3	3	3	3	3	3	3	3
553	0	10	1	Kunming	Lianhua	4	5	5	5	5	5	5	5	5	4	5	3	5	4	5	3	5	5	5	4	2	5	5	4	2	1	1	5	5	5	3	5	1	5	1	4	4	3	5	2	4	5	3
554	0	10	0	Xishuangbanna	Erxiao	4	5	5	5	5	5	5	5	5	4	3	4	5	4	4	3	5	5	5	5	4	5	5	4	4	5	1	5	3	1	2	1	1	5	2	5	5	5	2	5	5	5	5
555	1	10	0	Xishuangbanna	Changle	5	4	5	3	4.75	4	5	4	5	1	4	5	3	3	4	2	5	5	5	4	1	2	3	4	5	4	1	5	3	1	4	3	4	5	5	1	2	3	4	5	4	3	2
556	1	10	0	Xishuangbanna	Zhongxin	4	3	5	2	5	5	5	5	4	3	5	4	4	4	3	2	3	5	4	5	1	2	2	4	5	5	1	5	1	1	5	5	1	5	1	5	5	5	5	2	2	2	5
557	1	10	0	Xishuangbanna	Zhongxin	4	5	5	4	5	5	5	5	3	4	4	3	5	5	5	5	4	5	5	4	4	5	3	4	3	5	1	5	3	3	3	4	3	4	5	4	5	5	5	5	4	4	4
558	1	10	0	Xishuangbanna	Erxiao	4	4	4	5	4	4	5	5	4	4	5	4	3	4	5	4	4	5	5	3	1	4	5	4	4	4	1	5	1	4	2	4	2.25	4	1	5	5	5	2.5	5	3.75	5	5
559	0	10	1	Xishuangbanna	Yixiao	4	5	5	5	5	5	5	5	4	4	4	2	2	3	4	3	5	5	5	2	1	4	3	4	2	4	1	5	2	3	4	4	1	4	2	3	3	3	3	4	5	3	5
560	0	10	1	Xishuangbanna	Yixiao	4	5	5	5	5	5	5	5	5	5	5	4	5	5	5	4	5	5	5	5	4	5	5	4	4	3	1	1	1	1	2	5	1	5	1	4	4	3	2	5	5	3	5
561	1	10	1	Xishuangbanna	Shiji	5	5	5	5	5	5	4	5	5	5	5	3	5	5	5	5	5	5	5	5	2	5	5	4	5	5	1	5	5	1.25	1	5	1	5	1	5	5	5	5	5	5	5	5
562	1	10	1	Xishuangbanna	Yixiao	5	4	4	5	4	5	3	5	5	4	4	5	5	4	4	3	5	5	5	5	4	3	3	4	2	1	1	5	5	1	1	3	1	5	2	4	4	4	4	4	4	4	2
563	0	10	0	Hangzhou	Nanshan	5	5	5	5	5	5	5	5	5	5	5	5	5	5	5	5	5	5	5	5	5	5	5	5	5	5	1	5	4	3	2	5	3	5	2	5	5	5	5	5	5	5	5
564	0	10	0	Hangzhou	Nanshan	5	5	5	5	5	5	4	5	5	5	4	4	5	5	5	5	5	5	5	4	4	5	4	5	1	5	1	5	4	1	1	3	1	4	1	4	4	2.25	2	3	4	4	2
565	0	10	0	Hangzhou	Nanshan	4	4	5	4	5	5	4	5	5	4	4	4	4	4	5	4	5	5	5	1	4	5	4	5	1	3	1	5	3	1	4	3	1	5	1	2	4	3	2	3	4	2	2
566	0	10	0	Hangzhou	Nanshan	5	5	5	5	5	5	5	5	5	5	5	5	5	5	5	5	5	5	5	5	5	5	5	5	1	5	1	5	5	1	4	5	3	4	1	5	5	2.75	1	5	5	5	5
567	0	10	0	Hangzhou	Lijia	5	5	5	5	5	5	5	5	5	5	5	5	5	5	5	5	5	5	5	5	5	5	5	5	5	5	1	5	5	1	3	5	1	5	1	5	5	5	5	5	5	5	5
568	0	10	0	Hangzhou	Lijia	5	5	5	5	5	5	5	5	5	5	5	5	5	5	5	5	5	5	5	5	5	5	5	5	5	5	1	5	5	1	5	1	1	5	1	1	1	5	1	5	5	5	5
569	1	10	0	Hangzhou	Nanshan	5	5	5	5	5	5	5	5	5	5	1	1	5	5	5	5	5	5	5	1	5	5	5	5	1	5	1	5	1	1	1	1	1	5	1	5	5	5	5	5	5	5	5
570	1	10	0	Hangzhou	Lijia	4	5	4	5	4	4	4	5	3	4	5	5	5	5	5	4	3	5	5	4	2	5	3.75	5	5	3	1	4	4	1	2.25	3	1	4	1	5	3	4	3	2	4	3	1
571	0	10	1	Hangzhou	Shengli	5	5	5	5	5	5	5	5	5	5	5	5	5	5	3	5	2	5	5	2	2	4	5	5	5	5	1	5	5	1	4	5	2	2	1	5	5	5	5	4	5	3	3
572	0	10	1	Hangzhou	Fenghuang	3	5	5	5	5	5	5	5	4	3	4	4	5	4	4	3	5	5	5	2	1	3	5	5	1	5	1	5	5	1	3	5	2	5	1	5	5	5	5	5	5	3	4
573	0	10	1	Hangzhou	Fenghuang	5	5	5	5	5	5	5	5	5	5	5	5	5	5	5	5	5	5	5	5	5	5	5	5	5	5	1	5	5	5	1	5	3	5	3	5	5	5	5	5	5	5	5
574	0	10	1	Hangzhou	Fenghuang	5	5	5	4	5	5	5	5	5	5	5	5	5	3	3	2	2	5	5	5	5	2	5	5	1	1	1	3	3	1	5	5	3	5	2	5	5	5	5	5	5	2	4
575	0	10	1	Hangzhou	Fenghuang	5	5	5	5	5	5	4.75	5	4	4	3	5	5	5	4	3	4	5	5	3	4	5	5	5	1	5	1	5	5	1	3	5	1	5	5	1	5	5	1	5	5	5	1
576	0	10	1	Hangzhou	Fenghuang	5	5	5	5	5	5	5	5	5	5	5	5	5	5	5	3	5	5	5	1	3	4	5	5	1	1	1	5	5	1	5	5	1	2	1	3	3	3	3	5	5	5	3
577	1	10	1	Hangzhou	Cuiyuan	5	5	5	5	5	5	5	5	5	5	5	5	5	3	4	4	5	5	5	5	5	5	5	5	5	1	1	5	5	1	4	5	1	5	1	5	5	5	5	5	5	5	2
578	1	10	1	Hangzhou	Fenghuang	5	5	5	5	5	5	5	5	5	5	4	5	4	4	4	4	5	5	5	5	4	3	5	5	1	1	1	5	5	5	1	5	1	5	2	5	5	5	5	5	4	4	3
579	0	10	0	Kunming	Zhugou	4	4	4	5	5	5	4	4	4	4	4	5	4	4	5	5	4	5	5	5	4	5	4	5	5	4	1	5	5	1	3	1	5	5	1	5	5	5	5	5	5	5	1
580	0	10	0	Kunming	Zhugou	4	5	5	5	5	5	5	5	5	5	5	2	5	4	4	5	5	5	5	5	5	4	5	5	4	4	1	5	4	1	5	4	1	5	1	4	3	3	4	4	5	5	5
581	1	10	0	Kunming	Erjie	5	4	5	5	5	5	5	5	5	5	3	4	5	3	5	5	5	5	5	3	4	5	2	5	2	2	1	3	3	1	2	1	1	4	1	5	1	3	5	5	3	2	5
582	1	10	0	Kunming	Zhugou	5	5	5	5	5	5	1	5	5	1	5	3	5	3	5	5	5	5	5	5	5	2	5	5	5	5	1	5	1	1	3	5	5	2	1	1	1	1	1	5	5	5	1
583	0	10	1	Kunming	Lianhua	5	5	5	5	5	5	5	4	5	4	5	5	5	5	5	5	4	5	3.5	5	4	5	5	5	1	5	1	5	5	1	2	5	5	5	5	5	5	5	5	5	5	5	5
584	0	10	1	Kunming	Lianhua	5	4	5	5	5	5	4	4	5	3	5	4	5	4	3	2	5	5	5	3	1	3	5	5	5	3	1	4	5	1	4	4	1	5	1	2	5	5	5	5	5	4	3
585	0	10	1	Kunming	Wuhua	5	5	5	5	5	5	5	5	5	5	5	5	5	5	5	5	5	5	5	5	3	3	5	5	5	5	1	5	4	1	4	5	1	5	1	5	5	5	5	5	5	5	5
586	0	10	1	Kunming	Wuhua	5	5	5	5	5	5	5	5	5	5	5	5	5	4	5	5	5	5	5	5	5	5	5	5	1	4	1	5	5	5	2	5	5	5	1	5	5	5	5	5	5	3	5
587	0	10	1	Kunming	Yunda	5	5	5	5	5	5	4	5	5	4	5	5	4	5	4	5	4	5	4	4	3	5	5	5	4	4	1	5	5	1	2	4	2	5	2	5	5	5	5	4	3	4	5
588	0	10	1	Kunming	Yunda	5	5	5	5	5	5	5	5	5	5	5	1	5	3	5	4	5	5	5	3	3	4	5	5	4	4	1	5	5	1	5	5	1	4	1	5	4	5	4	5	5	3	3
589	1	10	1	Kunming	Wuhua	5	4	5	4	5	5	3	3	2	4	1	5	4	3	4	5	2	5	5	5	1	2	1	5	4	2	1	3.5	3	4	5	1	1	2	1	3.75	5	4	4	4	4	2	1
590	1	10	1	Kunming	Wuhua	5	5	5	5	5	4	5	5	4	5	5	4	5	5	5	5	5	5	5	4	5	5	5	5	5	5	1	5	5	1	5	5	5	5	1	5	5	5	5	5	5	5	5
591	1	10	1	Kunming	Wuhua	5	5	5	5	5	5	4	5	5	4	5	3	5	5	5	5	5	5	5	3	2	4	4	5	3	3	1	5	5	3.75	2	4.75	1	5	1	5	5	3	5	5	5	5	4
592	0	10	0	Xishuangbanna	Zhongxin	4	5	4	5	5	5	5	5	5	4	3	1	5	5	5	5	4	5	4	3	4	5	4	5	4	5	1	5	5	1	2	5	1	5	1	3	3.5	2	5	4	5	4	1
593	1	10	0	Xishuangbanna	Erxiao	5	5	5	5	5	5	4	5	4	3	5	3	4	4	5	3	2	5	3	3	3	4	4	5	4	2	1	3	4	1	5	5	1.75	3.25	1	2.75	2	5	1	1	4	3	4
594	1	10	0	Xishuangbanna	Erxiao	4	3	5	4	5	2	3	4	3	3	4	5	5	4	4	5	4	5	4	3	4	4	3	5	3	4	1	3	2	2	1	2	2	2	1	1.25	2	2	4	4	5	5	5
595	0	10	1	Xishuangbanna	Shiji	5	5	5	4	5	5	5	5	5	5	4	4	4	5	5	5	3	5	5	3	3	4	5	5	2	2	1	5	3	1	5	4	2	4	1	2	2	2	3	5	3	2	3
596	0	10	1	Xishuangbanna	Shiji	5	5	5	5	5	5	4	5	5	5	5	1	5	5	4	5	5	5	4	5	5	5	5	5	5	4	1	5	5	1	5	4	1	5	1	5	5	4	5	5	5	4	5
597	0	10	1	Xishuangbanna	Yixiao	5	5	5	5	5	5	5	5	5	5	5	5	4	4	4	3	5	5	5	5	2	5	5	5	1	5	1	5	5	1	1	5	1	5	1	5	5	5	5	5	5	5	5
598	1	10	1	Xishuangbanna	Shiji	5	5	5	5	5	5	5	5	5	5	1	5	5	5	5	5	5	5	5	5	5	5	5	5	5	5	1	5	1	1	5	1	1	5	1	5	5	1	5	5	5	5	5
599	1	10	1	Xishuangbanna	Yixiao	5	5	5	5	5	5	5	5	5	5	5	5	5	4	4	5	5	5	5	5	5	5	5	5	5	5	1	1	2	1	5	4	1	4	1	4	3.75	5	5	5	5	4.25	5
600	0	10	1	Hangzhou	Shengli	5	5	5	5	5	5	5	5	5	5	5	5	4	3	4	2	4	4	4	3	2	2	2	3	2	3	1.75	2	4	1	3	4	3	5	1	4	3	2	4	3	4	2	2
601	1	10	0	Xishuangbanna	Erxiao	5	4	5	5	5	5	5	5	5	5	5	4	5	5	4	3	5	4.75	5	5	5	5	4	5	2	5	1.75	1	2	3	5	4	1	5	4	5	2.5	2	5	2	4	4	5
602	0	10	1	Hangzhou	Fenghuang	5	5	5	4	5	3	5	4	5	5	3	5	5	2	5	3	1	1	5	2	1	3	4	2	1	2	2	4	3	1	2	3	1	2	5	3	2	4	2	2	1	1	3
603	1	10	1	Hangzhou	Shengli	3	3	4	3	3	3	4	5	3	4	4	4	2	2	3	1	1	2	2	2	1	1	1	1	1	1	2	1	4	1	3	1	1	2	1	3	1	2	2	4	4	1	1
604	0	10	0	Kunming	Erjie	3	4	5	4	5	4	4	4	4	5	5	3	5	3	4	3	3	2	2	2	3	3	2	1	2	1.5	2	3	2	1	3.25	3	2	2	3	3	2	3	1	2	2	3	2
605	0	10	0	Kunming	Erjie	4	5	5	5	5	3	4	3	3	3	4	3	4	3	3	3	2	2	2	3	2	2	3	1	3	3	2	3	1	2	2	3	2	2	3	3	3	2	3	2	2	2	3
606	1	10	0	Kunming	Zhugou	3	5	5	3	4	3	4	4	3	3	3	2	3	2	3	3	4	2	4	1	2	2	3	1	1	1	2	3	4	2	5	2	1	2	1	3	2	2	2	3	2	2	2
607	0	10	0	Xishuangbanna	Erxiao	5	5	5	5	4	4	4	4	4	5	4	5	4	3	4	5	2	2	3	3	1	2	5	1	5	4	2	4	2	1	5	2	4	3	2	4	2	1	2	5	4	5	4
608	1	10	1	Kunming	Wuhua	5	5	5	3	4	4	4	3	4	4	5	4	5	3	4	5	2	2	3	4	1	2	3	2	1	1	2	3	4	1	5	5	4	3	1	2	3	4	2	2	3	2	2
609	1	10	0	Xishuangbanna	Changle	3	2	4	3	4	4	4	3	5	3	4	2	5	4	3	2	4	2	2	2	3	1	3	2	1	1	2	2	3	2	5	3	2	2	3	1	1	1	1	2	1	2	1
610	0	10	0	Xishuangbanna	Changle	5	1	4	2	4	2	4	4	5	5	4	2	5	3	2	3	2	2	4	3	2	3	4	3	2.75	5	2	3	2	3	5	4	2	3	2.5	3	2	3	3	4.25	4.5	3	2
611	1	10	0	Xishuangbanna	Zhongxin	4	4	5	4	4	5	5	4	4	4	3	4	5	3	4	4	3	2	4	3	3	3	3	3	1	1	2	2	1	3	2	2	3	3	1	1	1	1	2	1	1	3	1
612	0	10	0	Kunming	Erjie	5	4	4	3	5	4	5	4	4	3	4	4	4	3	2	2	3	3	2	2	2	3	2	1	2	1	2	3	1	1	1	2	1	2	1	1	1	1	1	3	3	3.5	2
613	1	10	1	Kunming	Wuhua	4	5	5	4	5	4	4	4	4	5	5	5	5	2	3	1	3	3	1	2	1	1	2	1	1	1	2	3	4	4	5	2	1	2	1	2	1	1	2	1	1	2	3.25
614	0	10	1	Hangzhou	Shengli	5	5	5	5	5	5	5	5	5	5	5	5	5	4	5	3	3	3	2	3	3	2	3	2	2	3	2	3	5	1	5	2	1	3	1	3	3	3	3	3	3	2	2
615	0	10	1	Hangzhou	Fenghuang	4	5	5	5	5	4	4	4	4.5	3	5	4	4	2	3	4	3	3	3	2.5	1	1	2	2	1	2	2	3	3	1	5	3	1	4	1	2	2	2	2	3	3	2	3
616	0	10	1	Hangzhou	Fenghuang	4	5	5	5	5	5	5	5	5	5	5	5	5	4	3	3	3	3	3	3.5	4	2	4	2	1	1	2	1	4	1	2	5	1	5	1	4	4	4	4	4	4	4	4
617	1	10	1	Hangzhou	Fenghuang	4	5	5	3	2	3	4	3	3	4	4	5	4	3	3	2	3	3	3	3	2	3	3	2	1	1	2	3	3	4	5	4	2	3	1	1	1	1	1	3	3	3	3
618	0	10	0	Kunming	Erjie	5	5	5	5	3	4	4	5	3	4	3	2	5	2	4	4	5	3	5	1	2	5	1	2	2	1	2	4	5	1	5	3	1	4	1	2	3	5	4	5	5	4	2
619	0	10	0	Kunming	Erjie	4	3	5	4	5	5	4	4	4	4	4	3	5	3	3	3	2	3	2	4	2	3	2	2	2	1	2	3	2	1	5	4	1	2	2	1	1	1	1	2	2	2	3
620	1	10	0	Kunming	Erjie	4	2	4	4	5	5	4	4	3	4	5	3	4	3	4	3	5	3	3	4	3	4	5	2	1	2	2	4	2	2	5	2	2	1	3	1	3	2	1	3.25	2.5	2	3
621	0	10	0	Xishuangbanna	Changle	5	5	3	4	4	5	4	5	5	3	5	4	3	2	4	1	2	3	3	5	3	1	3	2	4	2.5	2	2	3	3	3	2	3	2	1	4	4	3	1	2	3	1	2
622	0	10	0	Xishuangbanna	Erxiao	4	5	4	5	5	4	4	5	4	3	4	4	5	3	4	2	3	3	1	3	2	2	2	2	2	2	2	2	2	1	2	2	2	2	2	3	3	4.25	2	2	3	2	3
623	1	10	0	Xishuangbanna	Zhongxin	5	3	5	5	5	4	5	4	5	3	4	4	4	3	5	2	3	3	4	3	4	5	4	2	3	3	2	3	2	1	5	4	3	5	2	3	4.25	3.25	3	4	4	2	2
624	1	10	1	Hangzhou	Cuiyuan	5	5	5	5	5	5	5	5	5	5	5	5	5	5	4	2	3	3	3	3	5	5	5	2.25	3	3	2	5	3	1	4	5	5	5	5	3	4	4	4	5	5	1.5	5
625	0	10	0	Hangzhou	Nanshan	4	2	5	4	5	4	4	5	4	4	4	4	3	4	3	3	5	3	5	5	3	4	4	3	1	4	2	4	4	2	5	4	2	3	2	3	3	3	3	3	3	4	5
626	0	10	1	Hangzhou	Shengli	5	5	5	4	5	4	5	3	3	3	3	4	5	3	3	3	4	3	4	3	2	4	2	3	2	4	2	3	3	1	2	2	1	3	1	3	2	2	3	2	2	1	2
627	1	10	1	Hangzhou	Fenghuang	5	2	3	4	5	4	4.25	3	4	3	5	5	2	3	5	3	4	3	3	2	1	4	4	3	1	1	2	2	4	3	4	4	2	3	1	2	2	2	2	3	5	4	5
628	0	10	1	Kunming	Yunda	4	5	5	5	5	4	5	5	5	5	5	5	5	3	3	3	3	3	3	3	4	3	4	3	3	3	2	4	4	2	5	3	2	3	2	3	3	3	3	3	3	3	3
629	1	10	1	Kunming	Lianhua	4	5	5	5	5	5	4	4	3	3	4	5	5	3	3	3	3	3	3	3	2	3	3	3	2	2	2	2	2	2	5	2	2	2	1	2	2	1	1	5	3	2	2
630	1	10	1	Kunming	Wuhua	4	5	5	5	5	4	5	5	5	5	5	5	3	3	4	4	4	3	3	3	3	3	3	3	3	2	2	3	3	3	5	3	3	3	3	3	3	3	3	3	3	3	3
631	1	10	0	Xishuangbanna	Changle	5	4	5	5	5	5	5	5	4	4	3	4	5	4	4	4	4	3	4	4	4	4	4	3	4	4	2	4	3	2	5	2	3	3	1	1	2	2	1	2	2	2	1
632	1	10	1	Xishuangbanna	Shiji	5	2	5	4	5	5	5	5	5	4	4	4	5	4	5	5	4	3	5	5	3	5	4	3	4	4	2	4	3	1	2	5	3	4	2	5	5	5	5	4	3	2	4
633	0	10	1	Hangzhou	Fenghuang	3	4	4	3	4.25	5	5	4	3	4	3	4	4	2	3	3	4	3	2	2.75	3	2	1	4	1	1	2	4	3	1	2	2	1	2	1	2	2	2	3	4	2	5	3
634	0	10	1	Kunming	Yunda	5	5	5	5	5	5	5	5	5	5	5	5	5	5	5	5	4	3	5	5	2	4	5	4	4	3	2	4	5	1	2	5	1	5	2	2	5	5	2	5	5	4	5
635	0	10	1	Hangzhou	Shengli	5	5	5	1	5	5	5	5	3	4	5	4	5	4	3	5	4	3	5	5	2	5	4	5	2	2	2	3	3	1	2	5	1	5	1	4	5	5	3.5	3	3	3	3
636	0	10	1	Kunming	Yunda	5	5	5	5	5	5	5	5	5	5	5	5	5	3	4	2	3	3	3	2	1	3	4	5	1	1	2	3	2	1	2.25	2	1	3	1	3	2	2	2	3	3	4	3
637	0	10	0	Kunming	Erjie	4	5	5	4	5	4	4	5	5	4	5	4	4	3	4	3	3	3.75	3	2.5	2	3	2	1	1	1	2	3	4	2	3	4	2	3	3	3	2	2	2	3	3	3	4
638	0	10	0	Hangzhou	Lijia	4	3	4	3	4	4	3	4	3	4	2	4	4	2	4	2	3	4	2	1	1	3	2	1	1	1	2	3	2	1	3	1	2	3	1	3	1	3.25	3.25	2	1	2	1
639	1	10	0	Hangzhou	Nanshan	5	5	5	3	4	4	4	3	2	4	3	4	3	1	2	1	1	4	1	1	1	1	1	1	1	1	2	5	3	1	3	1	4	1	1	2	2	2	2	1	1	1	1
640	0	10	0	Kunming	Erjie	3	4	5	4	3	4	5	4	3	5	4	4	5	3	2	2	4	4	3	2	1	2	1	1	1	1	2	1	2	1	2	2.75	2	3	3	2	1	2	2	1	4	1	4
641	0	10	1	Kunming	Lianhua	1	5	4	1	3	3	2	3	1	2	1	2	4	2	3	1	1	4	2	2	1	1	1	1	1	1	2	3	3	1	3	2	1	2	1	4	3	2	2	2	3	2	2
642	0	10	1	Kunming	Yunda	5	5	5	5	5	4	4	4	5	5	5	4	5	3	4	2	5	4	4	3	1	3	2	1	1	1	2	3	4	1.75	2	4	1	1	1	3	2	3	2	4	3	3	4
643	0	10	0	Hangzhou	Nanshan	5	4	5	5	5	4	5	5	5	5	5	5	5	4	3	3	3	4	5	3	3	4	4	2	1	3	2	3	1	1	1	3	3	4	2	3	3	3	3	3	2	2	3
644	1	10	0	Hangzhou	Lijia	4	5	5	4	3	3	5	5	3	4	2	4	1	2	5	3	5	4	2	3	3	4	4	2	4	3	2	3	2	4	5	4	4	2	5	3	4	5	3	1	5	1	5
645	0	10	1	Hangzhou	Shengli	3	4	5	5	5	5	5	5	4	4	5	5	4	3	3	3	4	4	3	3	2	5	3	2	1	1	2	3	4	1	3	4	2	2	1	2	3	4	2	3	4	3	3
646	0	10	1	Hangzhou	Fenghuang	5	5	5	5	5	5	3	5	4	3	5	4	5	2	3	3	4	4	4	2	1	3	2	2	1	1	2	3	2	1	3	4	1	3	1	2	2	1	1	4	4	2	3
647	0	10	1	Hangzhou	Fenghuang	5	5	5	5	4	5	4	5	5	5	4	5	5	3	5	5	5	4	4	3	3	3	5	2	1	1	2	5	5	3	3	3	2	5	2	5	5	5	5	4	5	2	3
648	1	10	1	Hangzhou	Fenghuang	4	5	5	4	5	4	4	4	4	4	5	4	3	3	3	3	3	4	2	2	1	3	2	2	1	1	2	2	4	3	3	3	2	3	2	4	4	4	4	5	4	3	2
649	1	10	1	Hangzhou	Fenghuang	5	5	5	5	5	3	5	5	4	3	3	5	5	4	3	2	2	4	3	1	1	1	1	2	1	1	2	2	5	5	5	1	2	3	1	3	2	3	3	2	4	1	1
650	0	10	0	Kunming	Erjie	4	5	5	5	5	5	5	5	5	4	5	5	5	4	5	3	4	4	3	3	4	4	3	2	1	1	2	2	2	1	5	2	3	2	2	3	3	1.75	2	2	2	2	2
651	0	10	1	Kunming	Lianhua	5	5	5	5	5	5	5	5	5	5	5	5	5	3	3.25	3	3	4	4	3	3	4	2	2	2	2	2	2	4	1	4	5	1	4	1	4	4	4	2.75	2	5	5	2
652	1	10	1	Kunming	Lianhua	4	4	5	4	4	4	4	3	4	4	5	3	5	3	4	3	4	4	4	4	4	5	3	2	2	2	2	4	4	2	4	4	3	3.5	2.75	4	4	4	2.5	2	4	2	3
653	1	10	1	Kunming	Lianhua	4	5	5	5	2	4	5	4	4	4	4	2	5	3	3	3	2	4	3	2	2	3	3	2	2	1	2	3	4	2	3	3	1	4	1	3	2	4	4	4	3	3	4
654	1	10	1	Kunming	Yunda	5	5	5	4	3	3	5	4	4	3	5	3	5	2	3	2	4	4	4	1	1	1	1	2	1	1	2	2	3	1	4	5	2	4	1	4	3	2	4	2	5	1	3
655	0	10	0	Xishuangbanna	Changle	5	4	4	4	5	3	4	3	3	4	4	4	3	3	4	3	3	4	3	3	2	3	3	2	4	3	2	3	2	3	3	3	3	4	2	4	3	2	2	3	2	2	1
656	0	10	0	Xishuangbanna	Erxiao	4	5	4	5	5	4	5	5	5	4	4	4	5	3	4	3	4	4	4	2	3	4	5	2	2	4	2	4	4	1	2	4	3	2	3	3	4	4	4	2	2	3	2
657	0	10	1	Xishuangbanna	Shiji	4	5	5	5	5	5	3	3	4	3	4	3	4	2	4	2	3	4	3	2	1	2	1	2	1	1	2	2	3	3	1	4	2	3	3	2	2	2	1	3	3.5	2	3
658	1	10	1	Xishuangbanna	Shiji	4	4	4	4	4.75	4	4	5	5	4	5	4	4	3	4	3	4	4	3	3	2	3	4	2	2	2	2	2	2	1	5	4	3	3	1	4	4	2	4	4	3	4	2
659	1	10	1	Xishuangbanna	Shiji	5	5	5	4	5	4	5	4	5	4	5	3	4	3	4	3	2	4	4	3	2	3	1	2	1	1	2	3	3	1	1	3	2	3	2	4	2	2	2	4	4	4	3
660	0	10	1	Hangzhou	Shengli	5	5	5	5	5	4	5	5	5	3	5	5	4	5	5	3	5	4	2	3	2	2	3	2.5	1	1	2	2	4	3	5	5	1.25	2.5	5	5	5	5	2.75	3	3.75	4	4
661	0	10	1	Hangzhou	Fenghuang	4	4	4	4	4	4	4	4	4	4	4	4	4	4	4	4	4	4	3	2	2	2	3	3	1.5	2	2	4	4	2	2	4	2	3	4	4	4	4	4	4	4	4	4
662	0	10	0	Kunming	Erjie	5	5	5	5	5	5	5	5	5	5	5	5	5	2	4	4	4	4	5	3	3	2	3	3	4.25	4.25	2	3	2	1	3	3	1	2	3	1	1	1	2	3	2	3	2
663	1	10	0	Kunming	Erjie	5	4	5	4	4	4	3	3	4	5	3	5	5	3	4	3	5	4	4	4	3	2	1	3	3	3	2	4	4	2	1	2	1	4	1.5	2	2	2	2	4	3	3	3
664	0	10	1	Kunming	Yunda	5	5	5	5	5	4	4	5	4	4	5	5	5	4	4	5	5	4	4	5	5	4	5	3	3	3	2	4	4	3	3	5	2	4	3	3	4	2	4	4	5	3	3
665	1	10	1	Kunming	Lianhua	4	5	5	4	5	5	4	5	5	5	2	2	4	3	4	4	3	4	3	3	2	4	4	3	3	2	2	4	4	1	5	2	1	4	1	3	4	4	4	4	4	4	4
666	1	10	1	Kunming	Wuhua	3	4.75	4	2	4	3.75	3.5	4	4.75	4	4.25	2	3	3	4	2	3	4	1	2	3	2	2	3	1.75	3	2	2	3	1	5	3	2	3	4	3	2	2	3	3	3	2	3
667	1	10	1	Kunming	Wuhua	5	5	5	4	5	5	3	4	3	3	5	2	5	4	3	5	3	4	4	2	1	2	3	3	2	3	2	3	3	2	5	4	2	2	3	3	3	2	2	2	3	2	3
668	1	10	1	Kunming	Wuhua	4	4	4	4	4	4	4	3	3	3	5	3	3	4	4	4	4	4	5	3	2	4	3	3	2	2	2	3	4	1	5	5	2	2	2	1	1	1	1	1	1	1	3
669	0	10	0	Xishuangbanna	Changle	5	5	5	5	5	5	4	4	5	4	4	4	5	4	4	3	5	4	4	3	3	4	5	3	3	3	2	4	2	2	3	4	3	4	4	4	5	5	3	4	5	3	4
670	1	10	0	Xishuangbanna	Changle	4	5	5	4	5	4	3	4	4	3	5	2	3	2	3	2	3	4	3	1	1	2	2	3	1	1	2	3	2	3	2	2	1	2	3	2	3	1	4	5	4	5	4
671	1	10	0	Xishuangbanna	Erxiao	5	5	5	5	5	4	4	4	4	5	5	4	4	4	4	4	3	4	4	3	3	3	4	3	3	3	2	3	3	4	3	3.25	2	4	3	2	2	2	2	3	3	3	3
672	0	10	1	Xishuangbanna	Yixiao	4	5	5	4	5	5	5	4	2	4	3	4	5	2	5	3	4	4	5	2	2	4	2	3	1	1	2	3.5	3	1	5	2	2	4.25	1	3	3	2	2	3	4	5	2
673	1	10	1	Xishuangbanna	Yixiao	4	4	4	4	4	4	3	4	4	3	4	4	4	3	4	3	5	4	5	5	3	4	3	3	2	2	2	4	3	3	5	3.75	5	4	2	5	5	4	5	5	5	4	5
674	0	10	0	Hangzhou	Nanshan	5	5	5	5	5	5	5	4	5	4	5	3	5	3	4	2	5	4	3	3	2	4	5	4	1	3	2	4	3	1	2	4	1	3	2	3	2	4	2	4	3	2	5
675	0	10	0	Hangzhou	Lijia	4	3	5	5	5	4	4.5	5	4	4	3	5	5	4	5	5	5	4	5	5	2	5	4	4	3	4	2	4	5	1	2	4	5	5	3	3	2	3	4	3	4	5	5
676	0	10	1	Kunming	Wuhua	5	5	5	5	5	5	5	5	5	5	5	5	5	4	4	5	5	4	5	5	4	5	4	4	2	2	2	5	5	5	2	5	2	3	3	5	5	5	5	4	5	4	3
677	1	10	0	Xishuangbanna	Erxiao	4	5	5	5	5	5	4	4	4	5	4	4	5	3	4	5	4	4	5	3	4	3	4	4	2	4	2	4	1	1	5	1	1	4	1	2	5	3	1	3	4	5	4
678	1	10	1	Xishuangbanna	Shiji	5	5	5	5	5	5	4	5	5	4	3	4	5	4	5	4	3	4	4	5	2	1	5	4	1	1	2	5	3	5	5	5	1	5	5	3	4	4	3	5	5	5	4
679	1	10	1	Xishuangbanna	Yixiao	5	5	5	5	5	5	5	5	5	5	5	5	5	4	4	4	5	4	4	2	2	4	4	4	4	4	2	4	3	1	5	3	3	3	3	3	3	3	3	3	3	3	3
680	0	10	1	Hangzhou	Cuiyuan	5	5	5	5	5	5	5	5	5	5	5	5	5	3	5	3	5	4	5	5	2	3	5	5	1	4	2	4	4	1	3	5	2	4	1	5	5	5	5	5	5	5	5
681	1	10	1	Hangzhou	Cuiyuan	5	5	5	5	5	5	5	5	4	5	4	4	5	3	4	5	4	4	4	1	2	3	4	5	4	3	2	3	4	1	3	4	2	5	1	4	3	4	3	3	5	2	2
682	1	10	1	Kunming	Lianhua	4	4	5	4	5	5	5	4	5	4	5	4	4	3	3	5	2.75	4	5	2	4	1	4	5	1	1	2	3	5	1	4	5	1	1	3	3	3	3	4	5	3	1	5
683	0	10	0	Xishuangbanna	Zhongxin	5	5	5	5	5	5	5	5	5	5	5	2	5	5	5	5	5	4	5	5	5	4	5	5	5	5	2	3	4	1	5	5	1	4	1	5	5	5	5	5	4	4	5
684	0	10	1	Xishuangbanna	Shiji	5	4	5	4	4	5	4	5	5	4	5	5	5	4	5	4	5	4	5	4	3	5	5	5	3	5	2	3	3	1	2	4	3	4	2	4	3	3	4	5	4	5	4
685	0	10	1	Xishuangbanna	Shiji	5	5	5	5	5	4	5	4	5	5	5	5	5	5	5	5	4	4.75	4	3.75	5	5	5	5	4	4	2	3	3	2.25	2	4	3	3	3	5	4	4	3.25	4.5	4	5	4
686	0	10	0	Hangzhou	Lijia	5	3	5	3	5	3	4	4	4	3	4	3	5	2	3	2	5	5	4	3	2	2	1	1	1	1	2	3	1	1	3	4	2	1	1	1	1	1	1	2	2	1	1
687	1	10	1	Hangzhou	Shengli	5	4	5	4	5	5	4	5	3	2	3	4	5	3	5	2	2	5	1	2	1	4	2	1	1	1	2	4	5	1	1	2	2	2	1	2	1	3	2	4	3	2	3
688	1	10	1	Hangzhou	Shengli	4	5	4	4	4	5	3	3	3	4	3	3	4	3	4	3	5	5	5	2	2	3	2	1	1	2	2	4	3	1	3	2	3	2	1	5	4	4	3	5	2	2	3
689	1	10	1	Hangzhou	Cuiyuan	5	5	5	5	5	5	5	5	3	4	5	5	5	1	3	2	4	5	3	1	1	5	1	1	1	5	2	1	3	1	5	5	1	3	1	2	2	2	2	5	3	1	5
690	1	10	0	Kunming	Erjie	3	5	5	5	5	4	4	4	4	3	3	5	5	3	4	3	3	5	3	3	1	2	3	1	1	1	2	2	3	1	5	2	1	2	2	2	1	1	3	2	2	3	1
691	0	10	1	Kunming	Yunda	5	4	4	4	5	4	4	4	4	5	4	2	5	4	5	4	2	5	3	2	1	5	2	1	3	3	2	5	4	1	2	4	1	3	3	3	3	3	4.75	3	4	2	3
692	0	10	0	Xishuangbanna	Changle	4	1	4	4	3	3	4	3	3	5	3	3	4	3	5	4	4	5	3	1	2	2	3	1	2	2	2	3	2	2	2	1	2	2	2	2	3	2	2	2	3	4	3
693	0	10	0	Xishuangbanna	Erxiao	5	4	5	5	5	5	4	3	5	3	3	3	5	3	4	5	3	5	5	2	3	5	1	1	1	1	2	2	2	1	1	3	3	2	1	2	3	1	1	2	3	4	5
694	1	10	1	Xishuangbanna	Shiji	4	5	5	4	4	4	4	4	5	5	5	3	4	4	5	4	3	5	5	2	2	3	4	1	1	4	2	3	3	2	5	3	1	5	4	4	4	4	4	3	2	5	1
695	0	10	0	Hangzhou	Nanshan	5	5	5	4	5	4	5	5	5	4	5	3	4	3	4	5	5	5	5	2	1	3	2	2	1	1	2	3	4	2	4	3	3	2	2	3	2	2	3	2	2	4	5
696	0	10	1	Hangzhou	Shengli	5	5	5	5	5	5	5	5	5	5	5	4	5	3	3	2	4	5	5	5	4	3	5	2	3	3	2	4	4	1	5	4.5	5	2	1	5	5	4	4	2	2	1	2
697	0	10	1	Hangzhou	Fenghuang	4	5	5	5	5	4	5	5	5	4	3	5	5	3	4	2	5	5	4	2	2	5	4	2	2	3	2	5	5	1	5	2	4	4	1	5	5	5	5	4	3	1	2
698	1	10	1	Hangzhou	Shengli	4	1	5	2	5	4	3	5	4	3	5	4	5	3	4	3	5	5	5	2	2	4	1	2	1	1	2	3	2	2	5	2	1	5	1	3	3	5	4	5	2	5	4
699	0	10	0	Kunming	Erjie	4	5	5	5	5	5	4	4	5	5	5	5	5	3	4	3	3	5	4	3	3	4	2	2	1	1	2	2	1	1	5	4	1	2	1	3	2.75	3	3	3.5	2	2	2
700	1	10	0	Kunming	Erjie	4	5	4	4	4	5	3	3	3	4	4	3	4	3	4	3	3	5	4.5	3	3	3	2	2	3	3	2	3	4	1	5	2	3	2	1	2	2	3	2	2	3	3	4
701	1	10	0	Kunming	Erjie	3	5	5	5	5	5	2	3	3	4	5	2	4	4	4	3	5	5	2	3	3	2	2	2	1	1	2	1	3	1	2	5	1	2	1	2	2	2	2	3	3	4	1
702	1	10	0	Kunming	Erjie	4	5	5	4	4	5	5	4	5	4	4	4	5	2	3	3	2	5	4	4	2	2	3	2	2	2	2	3	3	1	5	4	2	2	2	3	3	2	2	3	3	3	3
703	0	10	1	Kunming	Wuhua	4	5	5	5	5	4	5	5	5	4	5	3	4	3	4	3	5	5	5	3	2	3	4	2	3	3	2	5	3	1	4	5	1	5	3	4	4	4	3	5	3	1	5
704	1	10	1	Kunming	Lianhua	5	5	5	3	3	3	3	3	3	3	4	3	3	3	3	2	5	5	3	2	2	2	2	2	2	2	2	2	3	3	4	2	1	2	2	3	3	2	2	3	3	3	2
705	1	10	1	Kunming	Yunda	5	5	5	5	5	5	5	5	5	5	5	5	5	4	5	5	5	5	5	3	4	5	3	2	1	1	2	4	3	3	5	1	3	3	4	3	3	3	3	3	4	2	3
706	0	10	0	Xishuangbanna	Changle	5	5	5	5	5	4	5	5	5	5	4	3	5	3	4	2	3	5	4	2	4	4	3	2	2	2	2	3	2	4	4	3	5	2	5	2	3	3	3	3	2	2.75	4
707	0	10	0	Xishuangbanna	Zhongxin	5	4	5	5	5	5	5	4	5	4	5	4	5	3	4	2	4	5	4	3	2	3	4	2	1	2	2	4	2	1	2	3	1	2	4	2	4	2	2	3	3	5	3
708	1	10	0	Xishuangbanna	Changle	5	5	5	5	5	4	4	4	5	4	5	3	5	4	3	4	5	5	5	4	5	4	4	2	4	3	2	5	3	4	2	4	2	4	5	5	5	4	2	2	4	5	3
709	1	10	1	Xishuangbanna	Shiji	5	5	5	5	5	5	5	5	5	5	5	1	1	5	5	5	5	5	5	2	2	2	2	2	5	5	2	4	3	1	2	5	1	5	1	5	5	5	5	5	5	5	5
710	1	10	1	Xishuangbanna	Yixiao	5	5	5	5	5	5	5	5	4	5	4	5	5	4	5	5	5	5	5	4	3	4	3	2	3	3	2	4	4	4	5	5	3	5	2	4	4	3	3	5	5	5	5
711	1	10	0	Kunming	Erjie	4	5	5	5	5	5	3	5	5	5	5	5	5	3	2	2	2	5	3	5	1	2	3	2.25	3	3	2	3	2	2	2	3	2	3	2	1	1	1	1	3	2	3	2
712	0	10	0	Hangzhou	Nanshan	5	5	5	5	5	5	5	5	5	5	5	5	5	3	5	3	5	5	4.25	3	3	5	4	3	1	2	2	3	4	4	5	5	2	3.75	4	4	4	2	3	4	4	4	5
713	1	10	0	Hangzhou	Nanshan	5	5	5	5	5	5	4	3	5	5	3	2	2	3	5	3	4	5	5	2	1	5	1	3	1	3	2	4	2	1	5	1	3	1	1	3	1	1	3	2	3	2	1
714	0	10	1	Hangzhou	Shengli	5	5	5	5	5	5	5	4	4	3	5	3	4	4	3	4	4	5	5	2	3	5	3	3	1	1	2	3	3	1	2	4	1	3	1	3	3	3	3	4	4	3	2
715	1	10	1	Hangzhou	Fenghuang	4	5	4	3	5	4	3	3	4	3	4	3	3	3	4	2	3	5	3	2	2	3	4	3	1	3	2	3	4	2	3	3	2	3	2	3	3	3	3	4	3	2	3
716	1	10	1	Hangzhou	Fenghuang	4	5	5	5	5	5	5	3	3	4	2	3	3	2	2	1	2	5	4	2	1	4	1	3	1	1	2	2	4	2	5	2	1	3	2	3	3	3	3	2	3	1	1
717	0	10	0	Kunming	Erjie	4	5	5	4	4	5	4	5	5	5	5	4	4	4	5	4	5	5	4	4	4	5	3	3	3	2	2	3	2	1	1	5	1	2	2	3	3	2	3	4	4	4	4
718	1	10	0	Kunming	Erjie	5	5	5	5	5	5	5	5	5	5	5	1	5	4	5	5	5	5	4	4	3	5	5	3	1	3	2	4	2	1	2	1	1	3	2	4	3	4	2	5	3	4	5
719	1	10	0	Kunming	Erjie	3	5	5	4.25	4	4	4	3	4	4	4.25	5	3	2	5	3	3	5	4	4	3	4	3	3	1	1.25	2	2	4	1	5	5	3	2.5	2	2	2	2	1	1	5	5	3
720	1	10	0	Kunming	Erjie	5	5	5	4	4.75	4	4	4	5	4	5	5	5	4	5	4	4	5	5	3	2	2	3	3	2.75	2	2	3	4	1	5	5	2	3	1	2	5	2	1	3	2	1	2
721	0	10	1	Kunming	Lianhua	4	5	5	5	5	5	3	5	5	5	4	4	4	3	5	4	5	5	4	5	2	4	4	3	4	4	2	5	3	1	5	3	2	5	1	3	5	4	4	3	4	2	4
722	0	10	1	Kunming	Wuhua	5	5	5	4	5	5	4	4	5	3	4.25	5	5	4	5	4	4	5	4	3	3	4	5	3	2	2	2	4	3	1	1	4	2	4	2	4	3	4	4	3	3	5	2
723	0	10	1	Kunming	Yunda	5	5	5	5	4	5	5	4	5	5	5	4	5	4	4	5	4	5	3	2	2	3	3	3	4	4	2	4	3	3	4	4	4	4	3	4	4	4	4	4	4	4	4
724	1	10	1	Kunming	Lianhua	3	4	4	3	4	4	5	4	3	3	4	3	3	3	4	3	4	5	3	3	1	3	4	3	1	1	2	3	4	3	1	3	2	2	2	4	3	3	4	3	2	2	1
725	0	10	0	Xishuangbanna	Erxiao	5	4	5	5	5	5	4	5	4	5	4	5	4	4	4	5	4	5	2	3	5	4	5	3	3	2	2	5	5	1	3	5	2	4	1	4	4	4	5	3	2	5	4
726	1	10	0	Xishuangbanna	Zhongxin	5	4	4	4.5	5	4	5	5	5	5	2	4	4	4	4	3	5	5	5	3	3	4	2	3	2	1	2	3	4	1	3	4	3	5	4	4	4	2	2	3	5	5	4
727	1	10	0	Xishuangbanna	Erxiao	4	5	4	4	5	5	3	3	5	4	5	4	4	4	4	3	5	5	4	4	4	5	4	3	3	5	2	5	3	2	2	5	4	3	2	2	4	1	1	5	5	4	4
728	1	10	0	Xishuangbanna	Erxiao	4	3	4	5	5	5	4	5	4	5	4	3	4	4	5	3	4	5	4	4	3	4	4	3	3	3	2	4	5	1	4	3	1	3	2	4	3	2	3	3	4	3	2
729	1	10	0	Xishuangbanna	Erxiao	1	4	5	5	5	4	3	4	4	3	3	3	4	2	5	4	3	5	3	3	1	3	2	3	1	2	2	2	2	1	2	4	3	2	2	2	2	3	2	2	4	3	1
730	0	10	1	Xishuangbanna	Shiji	5	5	5	4	5	4	5	5	4	4	4	5	5	3	5	3	5	5	5	3	3	4	5	3	2	2	2	2	5	2	3	4	2	3	1	3	3	3	3	3	3	2	3
731	1	10	1	Xishuangbanna	Shiji	4	5	5	5	5	5	5	5	4	5	5	4	5	4	5	3	3	5	5	5	4	4	4	3	3	3	2	4	5	1	3	3	2	5	1	2	3	3	2	5	5	5	4
732	0	10	0	Hangzhou	Nanshan	5	4	5	5	5	5	4	5	5	5	4	3	5	5	4	3	4	5	5	4	3	4	5	4	1	4	2	5	5	2	4	5	2	3	1	4	4	5	5	4	5	2	2
733	0	10	0	Hangzhou	Nanshan	5	4	5	5	5	4	2	5	5	2	3	3	4	4	4	3	5	5	5	2	1	3	4	4	1	1	2	4	5	1	2	3	1	2	1	3	3	3	4	5	3	5	3
734	0	10	0	Hangzhou	Nanshan	5	5	5	5	5	5	5	5	5	5	5	5	5	3	5	3	5	5	5	3	3	5	5	4	1	1	2	5	5	3	3	5	3	5	4	5	3	3	4	5	4	5	5
735	0	10	0	Hangzhou	Lijia	4	3	5	4	5	4	5	4	4	5	4	4	5	4	5	3	4	5	5	5	4	5	3	4	1	1	2	5	3	1	4	4	1	4	1	5	5	3	4	4	5	3	3
736	1	10	0	Hangzhou	Lijia	4	1	5	5	5	5	4	5	3	5	4	3	4	3	4	2	3	5	3	2	3	1	2	4	2	1	2	1	3	1	2	2	1	4	2	1	1	2	1	3	2	4	1
737	1	10	0	Hangzhou	Lijia	5	4	5	5	5	5	5	5	4	5	4	5	5	3	4	5	4	5	4	5	5	5	4	4	5	5	2	2	3	1	5	3	1	4	1	1	2	3	2	2	2	1	3
738	0	10	1	Hangzhou	Shengli	5	5	5	5	5	5	5	5	5	5	5	5	5	5	5	5	5	5	5	3	2	5	5	4	4	4	2	5	5	2	2	5	2	5	1	5	5	5	5	5	4	4	4
739	1	10	1	Hangzhou	Cuiyuan	5	5	5	5	5	5	5	5	5	5	5	5	4	4	5	4	4.75	5	5	5	5	5	5	4	5	4	2	5	5	5	2	5	3	5	1	5	5	5	5	5	5	4	5
740	1	10	1	Hangzhou	Fenghuang	5	4	4	5	4	5	5	4	3	4	4	3	5	4	4	3	5	5	5	3	5	3	3	4	3	5	2	5	4	1	5	3	2	5	1	5	5	5	5	5	5	4	3
741	0	10	0	Kunming	Erjie	5	5	5	4	5	4	4	4	4	5	3	3	5	4	3	4	5	5	3.75	4	5	4	3	4	2	2	2	5	5	1	1	3	1	3	1	2	2	2	2	5	2	3	4
742	1	10	0	Kunming	Zhugou	5	5	5	5	5	5	5	5	5	4	5	4	4	4	4	4	4	5	5	3	2.5	4	3	4	2	3	2	4	4	3	1	3	2	4	2	2	2	3	1	3	5	5	4
743	0	10	1	Kunming	Lianhua	4	3	5	5	5	4	5	5	5	5	5	4	4	3	4	2	5	5	4	5	1	3	5	4	1	1	2	4	4	5	2	4	1	3	3	4	4	4	4	5	4	5	4
744	0	10	1	Kunming	Wuhua	5	5	5	5	5	5	5	5	5	5	5	5	5	5	5	5	5	5	5	5	4	5	5	4	3	3	2	5	4	1	1	5	3	4	1	4	3	3	3	5	4	3	5
745	0	10	1	Kunming	Yunda	5	5	5	5	5	5	4	3	4	3	3	3	5	5	4	5	3	5	5	3	2	3	4.5	4	3	3	2	4	4	1	3	2	3	1	2	4	4	4	4	5	5	3	2
746	0	10	1	Kunming	Yunda	4	5	5	5	5	5	4	4	4	5	5	4	5	4	4	3	5	5	4.5	4	3	5	3	4	4	3	2	3	5	1	3	4	3	4	2	5	5	5	4	4	4.5	4	3
747	0	10	1	Kunming	Yunda	5	5	5	5	5	5	4	5	5	5	5	5	5	3	4	5	5	5	4	5	2	5	5	4	4	4	2	5	4	3	1	5	2	2	1.75	5	5	5	5	3	3	5	3
748	0	10	1	Kunming	Yunda	5	5	5	5	5	5	5	5	5	5	5	5	5	5	5	5	5	5	5	3	5	3	5	4	5	5	2	5	5	2	3	5	1	5	1	5	5	5	5	5	5	4	4
749	0	10	1	Kunming	Yunda	5	5	5	5	5	5	5	5	5	5	5	5	5	5	5	5	5	5	5	3	4	2	5	4	3	3	2	3	5	1	2	3	2	3	1	5	5	5	5	5	5	5	5
750	1	10	0	Xishuangbanna	Zhongxin	3	5	5	4	4.75	5	5	4	5	4	4	5	4	5	3	4	4	5	4.5	2.5	5	4	3.25	4	4	2.5	2	2	3	3	2	2	2	1	4	3.25	3	3.75	2	1	3	4	1
751	0	10	1	Xishuangbanna	Yixiao	5	5	5	5	5	5	5	5	5	5	5	5	5	4	5	5	4	5	4	4	4	5	5	4	2	3	2	4	3	4	1	5	3	3	2	5	4	4	3	4	5	3	5
752	1	10	0	Hangzhou	Nanshan	5	5	5	5	5	5	5	5	5	4	5	2	3	5	5	4	5	5	5	3	1	2	5	5	1	1	2	5	3	1	3	5	2	4	1	3	4	4	3	5	4	3	3
753	0	10	1	Hangzhou	Shengli	5	5	5	5	5	5	5	5	5	5	5	5	5	5	5	5	5	5	5	5	5	5	5	5	5	5	2	5	5	2	3	5	1	5	1	5	5	5	5	5	5	5	5
754	0	10	1	Hangzhou	Shengli	5	5	5	5	5	5	5	5	5	5	5	4	5	5	5	5	5	5	5	5	3	5	5	5	2	4	2	4	5	1	1	5	1	3	2	5	5	5	5	5	5	5	5
755	0	10	1	Hangzhou	Cuiyuan	5	5	5	5	5	5	5	5	5	5	5	3	5	3	5	5	5	5	5	3	2	5	5	5	1	1	2	5	3	1	2	3	2	3	1	2	3	3	3	5	5	5	5
756	0	10	1	Hangzhou	Fenghuang	5	5	5	5	5	5	4	5	4	4	5	4	5	5	5	5	4	5	5	4	3	5	4	5	3	4	2	5	5	1	1	5	3	5	1	5	5	5	5	5	5	4	5
757	1	10	1	Hangzhou	Shengli	5	1	5	5	5	5	5	5	5	5	5	5	5	5	5	5	5	5	5	2	1	1	5	5	5	5	2	1	5	1	1	5	5	5	1	5	5	5	5	5	5	5	5
758	1	10	1	Hangzhou	Cuiyuan	5	5	5	5	5	5	5	5	4	4	5	5	5	4	5	5	4	5	5	5	4	4	5	5	4	4	2	5	5	2	3	2	2	5	1	5	5	5	4	4	4	2	5
759	1	10	1	Hangzhou	Cuiyuan	4	5	5	5	5	5	3	3	2	3	5	1	5	4	3	5	5	5	4	4	2	2	3	5	5	5	2	5	5	2	3	1	1	5	1	5	5	5	5	5	5	5	5
760	1	10	1	Hangzhou	Fenghuang	3	5	5	5	5	5	5	5	5	5	5	2	5	5	5	5	5	5	5	3	2.25	2	5	5	1	1	2	5	5	1	2	5	1	5	1	5	5	5	5	5	5	5	5
761	0	10	0	Kunming	Erjie	5	5	5	5	5	5	5	5	4	5	5	4	5	3	5	5	4	5	4	1	5	5	4	5	1	1	2	3	4	1	2	5	3	4	2	4	2	4	3	2	5	3	5
762	0	10	1	Kunming	Wuhua	5	5	5	5	5	5	5	5	5	5	5	5	5	4	5	5	5	5	5	4	4	5	5	5	4	5	2	5	5	1	2	3	2	4	1	5	5	5	5	5	5	5	4
763	0	10	1	Kunming	Yunda	5	5	5	5	5	5	5	5	5	4	5	5	5	5	5	5	5	5	5	3	4	5	4	5	5	5	2	5	5	5	2	5	1	1	2	5	5	5	5	4	3	5	4
764	1	10	1	Kunming	Yunda	5	5	5	5	5	5	5	5	5	5	5	5	5	3	4	2	3	5	5	5	2	3	5	5	1	1	2	5	5	1	3	5	1	5	2	5	5	5	5	5	5	4	5
765	1	10	1	Kunming	Yunda	4	5	5	5	5	5	5	5	5	4	4	3	5	5	5	5	4	5	5	3	2	5	5	5	4	2	2	5	4	2	2	5	3	5	2	5	5	5	5	5	5	5	4
766	1	10	1	Kunming	Yunda	5	5	5	5	5	5	5	5	5	5	3	4	4.25	4	5	4	5	5	5	5	5	5	5	5	5	5	2	4	5	1	3	2	1	5	1	3	2	4	4	5	3	3	5
767	0	10	0	Xishuangbanna	Erxiao	4	5	4	4	5	4	5	3	4	3	5	3	5	3	4	1	4	5	4	2	3	4	3.75	5	1	1	2	4	1	1.25	2	5	3	2	1	3	3	3	2	3	4	1	5
768	0	10	1	Xishuangbanna	Shiji	5	4	5	5	5	5	5	5	5	5	5	4	4	4	5	4	5	5	5	3	2	4	4	5	2	2	2	2	2	1	1	4	2	4	2	5	5	5	5	5	4	4	5
769	0	10	1	Xishuangbanna	Yixiao	5	5	5	5	5	5	5	5	5	5	5	5	5	5	5	5	5	5	5	5	3	5	5	5	4	5	2	3	1	2	2	5	3	5	1	3	3	3	3	5	5	4	5
770	1	10	1	Xishuangbanna	Yixiao	5	5	5	5	5	5	5	5	5	5	5	5	5	5	5	5	5	5	5	5	5	5	5	5	2	2	2	5	1	5	1	4.25	1	5	1	5	5	5	5	5	5	5	5
771	1	10	1	Xishuangbanna	Yixiao	5	4	5	5	5	5	4	5	5	5	5	4	5	4	5	5	5	5	4	5	4	4	5	5	3	3	2	4	2	2	4	5	2	4	2	5	5	5	4	4	5	4	5
772	1	10	1	Xishuangbanna	Yixiao	5	4	5	5	5	5	5	5	5	5	5	5	5	5	5	5	4	5	5	5	3	5	5	5	5	2	2	5	3	3	1.5	5	3	5	3	4	3	3	3.75	3	3	3	3
773	1	10	1	Xishuangbanna	Yixiao	5	5	5	5	5	5	5	5	5	5	5	4	5	5	5	4	4	5	5	4.5	5	4	5	5	2	4	2	3	5	4	3	5	5	5	5	5	5	5	5	4	5	5	5
774	1	10	1	Kunming	Wuhua	4	1	4	3	2	2	3	2	3.75	3.25	2	3	3	5	3	2	3	3	3	3	3	3	3	3	3	1	2.25	3	1	2	3	1	1	1	1	5	5	3	1	3	1	1	5
775	0	10	0	Hangzhou	Lijia	3	4	4	2	1	3	2	5	4	2	4	4	5	3	4	3.75	2	4	2	3	2	3	4	3	5	4	2.75	4	4	4	3	4	3	3	3	2	4	3	3.5	2	2.75	3	5
776	0	10	1	Xishuangbanna	Shiji	5	4	5	5	4	4	4	5	4	5	4	5	5	5	4	3	4	4	5	5	5	4	3	5	3	5	2.75	4	2	1	2	3	2.5	5	1	5	5	4	3	5	3.75	4	5
777	1	10	0	Kunming	Zhugou	4	5	4	3.5	3	2	3	4	5	4	3	1	4	3	2	2	4	1	3	3	2	4	3	2	4	1	3	2	1	1	2	5	3	2	3	4	2	4	2	4	2	4	3
778	0	10	1	Hangzhou	Fenghuang	5	4	5	5	5	5	5	3	4	3	3	4.25	4	2	3	3	2	1	4	1	1	2	2	3	1	1	3	2	3	1	4	1	1	2	1	2	3.5	2	2	2	4.5	1	2
779	0	10	1	Kunming	Yunda	5	5	5	3	5	4	4	4	4.25	3	4	3	2	3	3	4	4	2	2	2	1	1	2	1	1	3	3	2	5	1	2	5	1	1	2	4	4	4	5	3	2	5	5
780	0	10	0	Xishuangbanna	Zhongxin	4	5	5	4	4	4	5	4	4	3	4	5	4	2	5	2	3.5	2	3	2	1	3	2	1	1	2	3	4	1	2	3	3	1	2	1	5	4	2.5	4	3	2	3	3
781	0	10	0	Xishuangbanna	Zhongxin	5	4	5	3	5	3	5	3	3	5	5	3	3	3	3	1	1	2	3	1	1	2	1	1	1	1	3	1	3	3	4	4	1	1	1	2	4	3	1	1	1	1	1
782	1	10	0	Xishuangbanna	Changle	5	5	5	5	5	5	3	5	1	1	3	5	5	2	3	1	2	2	1	1	1	2	1	1	1	1	3	2	2	3	2	1	5	2	2	2	2	2	2	2	1	1	2
783	0	10	1	Kunming	Lianhua	5	5	5	5	5	5	5	4	4	5	5	5	5	3	3	3	2	2	2	4	2	2	2	2	1	1	3	3	3	3	2	3	3	2	3	3	3	3	3	3	2	2	3
784	0	10	0	Xishuangbanna	Zhongxin	5	5	5	4	5	4	5	5	5	5	5	5	5	2.75	3	3.5	4	2	4.25	1	4	3	3	3	1	1	3	3	1	1	1	3	2.25	3	1	4	4	1	3	3.75	2	4	3
785	0	10	0	Xishuangbanna	Zhongxin	4	1	4	4	5	5	5	4	5	4	4	3	4	3	3	2	3	2	4	3	1	3	5	3	2	2	3	2	2	1	1	4	2	3	3	1	5	4	3	2	4	5	3
786	1	10	0	Xishuangbanna	Zhongxin	4	4	4	5	5	5	5	3	3	2	1	3	2	2	5	3	1	3	2	2	1	2	1	1	1	1	3	3	1	4	2	2	2	2	2	3.25	3	3	2	3.75	4	4	2
787	0	10	0	Hangzhou	Nanshan	4	5	5	5	4	4	5	5	5	4	4.5	5	5	3	4	2	4	3	3	3	2	1	4	2	1	1	3	4	4	3	1	5	4	2	1	2	1	1	2	4	3	3	5
788	1	10	0	Kunming	Erjie	1	5	5	1	5	5	4	3	3	5	4	2	4	2.75	4.25	5	4	3	4	2	2	2	3	2	2	2	3	2	4	3	2	2	3	3.5	4	2	2	2	2	3	1	3.5	5
789	0	10	1	Kunming	Lianhua	5	5	5	5	4	4	5	4	4	3	3	4	3	2	2	2	2	3	3	2	2	2	4	2	2	4	3	2	5	2	2	1	1	2	2	2	2	5	2	4	5	1	2
790	0	10	0	Xishuangbanna	Zhongxin	4	5	4	5	5	5	5	4	3	4	4	3	5	3	4	3	2	3	2	3	2	2	2	2	1	1	3	3	1	2	5	3	3	2	2	2	2	2	2	3	4	2	3
791	0	10	0	Xishuangbanna	Erxiao	4	4	5	4	5	4	4	5	4	3	5	4	3	2	3	3	4	3	4	3	2	3	3	2	2	2	3	3	3	2	5	5	4	3	4	2	2	2	2	3	2	3	3
792	1	10	1	Hangzhou	Fenghuang	3	3	3	4	4	4	4	5	5	5	5	3	3	3	2	3	1	3	2	1	2	2	3	3	2	2	3	3	3	3	3	3	2	3	3	3	2	2	2	3	2	3	1
793	1	10	1	Kunming	Lianhua	5	5	5	4	5	5	4	4	4	4	5	4	5	3	3	2	4	3	4	1	3	5	4	3	1	1	3	2	2	2	3	5	1	3	1	5	5	5	5	5	4	1	4
794	1	10	0	Xishuangbanna	Zhongxin	4	4	5	3	5	3	5	3	4	2	1	3	4	2	4	2	3	3	4.25	3.75	2	3	3.75	3	2	3.25	3	2	1	1	3	2	4	4	3	3	4	3	2	3	4	3	2
795	1	10	0	Hangzhou	Lijia	5	5	5	5	5	5	1	4	4.75	4	4	4	4	3	4	2	5	3	2	4	4	1	3	3.75	3	4	3	4	2	4	2	3.25	1	1	1	2	1	1	2	2	2	1	1
796	0	10	0	Hangzhou	Nanshan	5	4	5	4	5	5	5	4	5	4	5	4	4	4	3	3	3	3	3	3	3	5	3.75	4	3	3	3	3.5	5	1	2	5	3	3	3	2	2	3	2	3	3	4	3
797	1	10	1	Hangzhou	Fenghuang	5	3	5	4	5	5	4	5	5	5	4	5	4	3	5	3	4	3	3	4	2	4	4	4	4	3	3	3	2	1	4	3	2	3	4	3	3	3	4	3	3	4	3
798	0	10	0	Xishuangbanna	Changle	5	4	4	4	4	3	5	3	4	5	2	5	5	3	2	4	5	3	4	4	3	2	5	4	3	5	3	1	1	5	4	4	3	2	2	5	2	5	5	4	5	4	5
799	1	10	0	Xishuangbanna	Erxiao	5	4	4	3	5	5	5	4	5	4	4	3	5	4	5	4	4	3	5	2	2	3	2	4	4	4	3	3	2	2	1	4	1	2	2	2	3	2	2	4	3	3	4
800	1	10	1	Xishuangbanna	Yixiao	4	4	4	4	4	4	3	3	4	3	4	3	4	4	4	4	3	3	4	3	2	3	4.75	4	3	3	3	4	4	1	3	4	3.75	2	2	3	3	2	2	3	2	2	2
801	0	10	1	Hangzhou	Fenghuang	5	5	5	5	4	5	5	5	5	3	5	3	5	5	5	5	4	3	5	3.75	3	3	5	5	1	1	3	1	3	1	2	5	1	5	1	5	5	5	5	5	5	1	1
802	0	10	0	Xishuangbanna	Changle	4	5	4	2	4.5	4	5	5	4	5	4	5	5	3	3	5	3	3	3	3.75	1	5	5	5	5	2	3	5	3	5	4	5	4	5	2	5	5	5	1	1	5	5	5
803	1	10	0	Xishuangbanna	Changle	5	4	5	4	5	3	4	4	4	3	4	3	4	4	5	4	4	3	5	4	3	4	4	5	5	4	3	3	2	3	1	4	4	3	2	2.75	4	3	3	4	5	3	5
804	0	10	0	Hangzhou	Nanshan	4	1	4	5	5	4	4	4	4	4	4	5	1	3	5	1	3	4	2	4	1	2	3	1	1	1	3	2	4	1	1	5	1	3	1	1	1	2	1	3	4	1	1
805	0	10	1	Kunming	Wuhua	4	5	4	4	5	3	4	5	3	4	3	5	4	3	5	4	5	4	3	3	2	3	2	1	1	1	3	4	3	1	1	3	1	3	2	2	3	4	3	3	4	2	4
806	1	10	1	Kunming	Lianhua	4	4	4	5	5	4	3	3	4	2	3	1	4	3	3	3	1	4	3	1	1	1	1	1	1	1	3	1	3	2	1	2	1	1	1	3	2	2	3	2	3	1	1
807	1	10	1	Kunming	Lianhua	4	5	5	5	5	4	4	4	3	4	4	4	3	3	3	3	4	4	4	5	4	3	5	1	1	1	3	4	4	4	3	5	1	3	1	1	4	1	1	5	4	2	1
808	1	10	1	Kunming	Wuhua	4	5	5	5	4	4	4	4	5	5	5	5	3	3	3	3	4	4	4	1	1	3	2	1	1	1	3	4	5	3	2	4	4	3	4	4	4	4	4	2	2	1	3
809	0	10	0	Hangzhou	Nanshan	5	5	5	4	5	5	5	4	4	5	4	5	4	3	4	3	3	4	3	5	4	4	4	2	1	1	3	3	2	3	2	3	3	3	3	2	2.75	2	2	2	3	3	4
810	1	10	0	Kunming	Erjie	4	4	5	4	5	4	4	4	5	3	4	4	5	3	4	3	2	4	3	3	2	2	2	2	1	1	3	4	2	4	1	2	1	2	3	4	3	1	2.25	2	3	2	3
811	1	10	1	Kunming	Yunda	3	4	4	4	3	3	3	3	3	3	3	4	3	3	4	3	5	4	3	1	3	3	4	2	4	1	3	3	1	1	2	1	2	3	1	1	2	2	1	2	3	4	2
812	1	10	0	Xishuangbanna	Zhongxin	4	4	5	4	5	5	5	4	5	4	5	5	5	3	4	4	3	4	2	5	1	5	3	2	3	3	3	3	4	2	2	5	2	3	5	2	4	3	2	2	4	2	2
813	1	10	1	Xishuangbanna	Shiji	4	5	4	4	5	5	5	5	4	3	4	2	4	3	4	3	3	4	4	3	2	2	3	2	1	2	3	2	2	1	2	4	2	2	4	3	2	2	2	3	3	4	4
814	1	10	1	Xishuangbanna	Shiji	5	5	5	5	5	5	5	5	4	4	5	2	5	4	5	2	2	4	5	4	1	2	2.75	2	1	1	3	4	1	1.5	2	4	1	4	1	5	5	5	5	3	5	2	2
815	1	10	0	Hangzhou	Lijia	5	5	5	5	5	5	5	5	5	5	5	5	5	3	3	2	4	4	2	4	2	1	3	3	3	3	3	3	3	1	3	3	1	3	1	2	1	1	2	3	3	4	2
816	0	10	0	Kunming	Zhugou	5	5	5	5	5	5	4	5	4	4.75	4	5	5	4	5	5	4	4	4	4	3	4	5	3	3	4	3	4	4	1	3	4	3	4.75	4	4	4	3	4	3	3	4	4
817	0	10	1	Kunming	Yunda	5	5	5	4	5	5	5	4	5	4	3	5	5	3	5	3	4	4	4	4	4	5	2	3	1	1	3	4	2	5	2	2	1	4	3	4	3	4	2	3	2	3	4
818	0	10	1	Kunming	Yunda	4	5	5	4	5	4	5	3	5	5	4	3	5	3	4	3	5	4	5	2	3	4	5	3	5	4	3	5	5	1	3.75	5	1	3	2	3	3	3	4	5	5	4	3
819	1	10	1	Kunming	Yunda	5	5	5	5	5	5	5	5	5	5	1	1	5	3	4	3	4.5	4	5	4	2	5	3	3	3	3	3	4	3	1	4	5	1	4	1	5	5	5	5	5	5	3	4
820	0	10	0	Xishuangbanna	Changle	5	5	4	4	4	5	3	3	4	5	5	3	5	3	4	3	3	4	4	3	2	2	4	3	3	2	3	4	2	2	1	5	3	3	4	3	4	2	2	4	3	5	5
821	0	10	0	Xishuangbanna	Zhongxin	4	5	4	5	5	4	5	5	5	4	4	4	5	3	4	3	4	4	5	4	3	4	4	3	3	3	3	4	4	3	3	5	5	4	3	5	5	5	5	4	4	5	5
822	0	10	0	Xishuangbanna	Zhongxin	4	5	5	5	5	5	5	5	4	3	4	4	5	3	4	4	3	4	4	5	4	3	3.75	3	3	3	3	4	4	4	1	3	4	3	4	3	4	5	4	3	2	4	2.75
823	0	10	0	Xishuangbanna	Zhongxin	4	5	5	5	5	4	5	4	5	4	5	4	5	4	5	4	3	4	4	4	2	2	3	3	1	1	3	3	4	1	3	5	3	4	3	2	5	5	3	3	2	4	5
824	0	10	0	Xishuangbanna	Zhongxin	4	4	4	4	4	4	5	4	4	4	3	4	4	4	3	4	4	4	4	3	3	4	3	3	4	4	3	4	3	1	3	4	2	4	2	4	5	5	2	3	2	4	5
825	1	10	0	Xishuangbanna	Changle	4	5	5	5	4	5	4	4	4	5	4	4	5	4	3	5	5	4	4	3	3	3	4	3	4	5	3	3	3	2	4	4	3	5	3	5	4	4	3	4	5	4	5
826	1	10	0	Xishuangbanna	Zhongxin	5	4	5	4	5	5	5	4	4	4	5	4	4	4	5	4	4	4	4	4	3	3	4	3	3	3	3	4	3	2	2	4	1	4	2	4	4	4	3	3	3	4	4
827	1	10	0	Xishuangbanna	Erxiao	5	5	5	5	5	5	4	4	3	5	3	5	5	4	5	4	4	4	5	3	3	5	4	3	5	4	3	4	2	1	3	3	1	4	5	1	1	1	3	4	3	5	4
828	1	10	1	Hangzhou	Fenghuang	3	4.75	5	1	5	2	5	5	5	1	4	4	5	1	1	3	3.75	4	2	2.75	1	1	5	4	1	1	3	3	3	1	3	2	1	3	1	5	5	5	5	4	1	3	4
829	1	10	0	Kunming	Zhugou	5	3	5	3	4	3	3	4	4	3	5	2	4	2	4	4	3	4	1	2	3	3	5	4	3	4	3	2	1	2	2	4	2	3	2	3	3.25	2	2.5	3	3.25	5	5
830	1	10	1	Kunming	Wuhua	5	5	5	5	5	5	1	3	3	4	3	3	5	3	4	5	5	4	5	4	2	2	4	4	2	2	3	4	4	5	3	4	5	3	4	4	3	3	4	4	5	3	4
831	0	10	0	Xishuangbanna	Changle	5	4	4	4	4	4	4	3	4	3	4	3	5	3	4	4	4	4	3	3	3	3	3	4	3	3	3	4	4	3	1	3	4	3	3	3	4	2	2.75	3	3	4	3
832	1	10	1	Hangzhou	Fenghuang	5	4	5	5	5	5	5	4	5	4	5	4	5	3	5	3	4	4	4	2	4	4	3	5	1	4	3	4	3	2	2	5	1	4	2	3	4	2	3	4	5	3	4
833	0	10	1	Kunming	Lianhua	4	5	4	5	3	5	3	5	5	4	5	4	4	4	5	2	4	4	4	4	1	1	4	5	4	4	3	3	3	3	4	4	4	3	3	5	5	5	5	4	3	3	5
834	1	10	0	Xishuangbanna	Zhongxin	4	5	4	3	5	5	5	4	3	4	3.25	4	5	3	4	3	3	4	4	5	3	2	3	5	3	1	3	2	1.75	1	1	4	3	4	3	2	5	4	1	3	4	2	5
835	1	10	1	Xishuangbanna	Shiji	4	5	4	5	5	5	5	4	3	3	5	4	5	4	5	3	3	4	3	5	3	5	5	5	3	3	3	3	4	3	1	4	1	4	1	3	3	3	2	2	3	3	2
836	1	10	1	Hangzhou	Shengli	4	3	5	5	4	4	4	3	4	3	2	5	5	3	2	1	4	4.5	4	4	1	2	1	3	1	1	3	1	2	1	3	2	2	5	2	3	3	2	3	3.75	2	1	2
837	1	10	1	Hangzhou	Shengli	3	2	4	5	3	5	5	3	3	3	5	3	3	2	2	4	4	5	3	3	1	3	1	1	1	1	3	4	4	3	5	5	2	3	3	2	2	2	1	4	4	1	1
838	0	10	1	Kunming	Wuhua	4	5	5	4	3	3	3	3	3	4	5	4	5	2	3	5	2	5	3	1	1	1	2	1	1	1	3	2	3	1	2	2	1	1	2	3	3	2	3	2	2	1	2
839	1	10	1	Kunming	Lianhua	5	5	5	4	4	4	4	4	4	4	5	5	5	2	4	4	3	5	4	2	4	3	4	1	4	3	3	5	4	3	4	5	3	3	3	4	4	3	3	2	2	3	3
840	1	10	0	Xishuangbanna	Erxiao	1	5	3	5	1	3	4	2	1	5	5	3	5	3	4	4	2	5	3	1	2	2	2	1	1	1	3	2	2	1	4	5	4	3	1	2	3	5	2	3	1	3	3
841	1	10	1	Kunming	Yunda	5	5	5	5	5	5	5	5	5	5	5	5	3	3	5	2	5	5	5	2	1	4	2	2	1	1	3	2	5	5	2	5	5	5	5	4	4	4	2	2	1	1	3
842	0	10	0	Xishuangbanna	Zhongxin	4	4	5	4	5	5	5	5	5	4	4	5	4	3	4	3	2	5	3	4	3	3	5	2	1	2	3	4	1	1	5	4	4	2	2	1	4	1	1	3	4	3	2
843	0	10	0	Xishuangbanna	Erxiao	4	5	4	5	5	4	4	5	4	5	5	4	4	4	5	3	4	5	5	4	3	3	4	2	4	5	3	4	5	1	3	5	2	4	3	5	4	5	3	3	5	5	4
844	0	10	0	Xishuangbanna	Erxiao	4	3	5	3	5	4	5	4	5	5	4	4	4	4	4	5	3	5	4	3	2	3	4	2	5	3	3	4	2	3	3	5	3	2	3	3	3	2	2	5	5	5	3
845	0	10	0	Xishuangbanna	Erxiao	1	5	4	2	4	4	5	3	4	5	4	5	4	4	5	3	2	5	4	5	2	4	3	2	2	2	3	4	2	1	1	5	2	4	2	1	1	1	5	5	4	3	4
846	1	10	0	Xishuangbanna	Erxiao	5	4	5	4	5	4	4	5	4	4	3	4	4	3	5	4	4	5	4	4	3	5	3	2	3	4	3	3	4	5	3	2	2.5	3.75	3	2	2	2	2	3	4	4	3
847	1	10	0	Xishuangbanna	Erxiao	4	5	5	5	5	4	4	5	2	4.5	4	5	5	3	5	5	4	5	3	2	3	2	1	2	1	1	3	3	3	2	5	3	1	4	2	2	2	2	2	3	3	1	4
848	0	10	1	Xishuangbanna	Shiji	4	5	5	4	5	4	4	3	5	3	4	3	4	4	5	4	3	5	4	3	2	2	3	2	2	1	3	4	2	2	5	5	3	2	3	2	3	2	2	4	3	5	2
849	0	10	1	Xishuangbanna	Shiji	4	5	4	5	5	5	5	4	3	3	3	1	3	3	5	3	2	5	5	1	3	2	4.5	2	2	5	3	4	1	1	5	5	1	3	1	3	1	1	3	5	5	5	5
850	0	10	1	Xishuangbanna	Yixiao	4	5	5	5	5	4	5	5	4	5	5	4	3	2	5	4	3	5	5	3	1	4	5	2	1	1	3	5	2	2	2	5	5	2	5	5	5	5	4	4	2	5	5
851	1	10	0	Hangzhou	Nanshan	5	4	5	4	3	3	3	3	4	4	5	4	4	3	4	1	4	5	4	4	2	4	3	3	1	3	3	4	4	1	4	5	1.25	3.75	1	3	3	3	4	5	3	5	3
852	0	10	1	Hangzhou	Fenghuang	5	4	5	5	5	5	5	5	5	5	5	5	5	3	3	2	1	5	2	2.75	1	2	5	3	5	5	3	2	2	1	1	3	2	4	1	4	2	2	3.75	5	3	3	3
853	1	10	1	Hangzhou	Shengli	5	5	5	5	5	5	5	5	5	5	5	5	5	3	5	3	3	5	3	5	4	5	5	3	3	5	3	5	5	1	2	5	1	5	1	5	5	5	5	3	5	3	5
854	0	10	0	Kunming	Erjie	3	3	5	3	5	5	5	5	1	5	5	5	3	3	5	4	4	5	4	3	3	5	3	3	3.25	2	3	3	4	1	3	3	1	4	2	2	1	3	5	4	3	4	3
855	0	10	1	Kunming	Yunda	5	5	5	5	5	5	5	5	5	5	5	5	5	3	3	3	3	5	3	3	3	3	2	3	3	3	3	3	3	3	2	2	2	2	3	3	3	3	3	3	3	3	3
856	0	10	1	Kunming	Yunda	5	4	5	5	4	5	5	4	5	4	4	3	4	4	4	3	4	5	4	3	2	3	3	3	2	2	3	4	4	2	2	4	2	3	3	4	4	4	4	4	4	3	2
857	1	10	1	Kunming	Lianhua	5	5	5	5	5	3	5	5	5	5	5	5	5	2	4	2	4	5	2	1	2	3	5	3	1	1	3	4	5	5	2	5	5	4	5	5	5	5	5	5	5	3	5
858	0	10	0	Xishuangbanna	Zhongxin	5	5	5	4	5	5	5	4	3	5	4	3	5	4	5	5	5	5	3	3	3	4	4	3	2	2	3	4	2	1	2	4	1	4	2	2	5	4	2	3	3	2	3
859	1	10	0	Xishuangbanna	Changle	4	3	5	4	5	4	3	5	4	5	3	3	3	3	2	4	3	5	5	3	4	3	4	3	4	3	3	1	1	1	5	3	4	2	4	1	3	3.25	2.75	4	2	5	3
860	1	10	0	Xishuangbanna	Zhongxin	5	5	5	5	5	5	5	4	4	3	5	4	5	3	4	3	4	5	5	3	3	4	4	3	3	3	3	4	3	1	3	4	2	4	3	3	3	3	3	4	4	4	4
861	1	10	0	Xishuangbanna	Zhongxin	4	5	5	5	5	5	5	4	5	3	4	3	4	4	4	4	5	5	4	3	2	3	4	3	4	5	3	3	2	1	3	4	3	4	2	3	5	3	4	4	4	3	1
862	1	10	1	Xishuangbanna	Shiji	5	4	5	4	5	5	4	5	5	4	5	4	5	3	5	3	4	5	5	3	3	2	2	3	3	3	3	3	2	1	1	2	3	3	3	3	3	1	2	3	3	4	3
863	1	10	1	Xishuangbanna	Shiji	4	5	4	4	4	3	4	3	4	5	5	4	4	4	4	4	5	5	4	4	4	3	3	3	3	3	3	4	3	3	2	5	3	3	4	5	4	4	5	4	5	5	4
864	1	10	1	Xishuangbanna	Yixiao	5	5	5	5	5	5	5	5	5	5	5	5	5	3	5	4	5	5	5	5	2	3	4	3	1	1	3	2	2	1	3	3	2	2	1	5	5	3	3	5	5	5	5
865	0	10	1	Hangzhou	Fenghuang	2	4	4	3	3	3	4	4	4	3	4	4	5	4	3	3	4	5	4	3	1	1	5	4	1	1	3	4	4	2	2	5	3	4	2	3	3	3	3	4	2	3	5
866	0	10	0	Kunming	Zhugou	5	4.75	4	5	5	4	4	5	4.5	4	5	4	5	4	5	4	5	5	5	4	5	4	5	4	4	4	3	5	4	3	3	4	4	4	3	4	5	3	3	4	5	4	4
867	1	10	0	Kunming	Zhugou	5	1	5	5	5	5	5	5	5	5	5	5	5	5	4	5	5	5	5	5	4	3	5	4	4	3	3	5	2	2	2	5	2	2	1	2	1	1	5	3	3	3	2
868	1	10	0	Xishuangbanna	Zhongxin	3	4	3	5	5	4	5	4	3	5	4	3	5	4	4	3	4	5	3	5	3	5	4	4	1	1	3	4	3	4	3	2	3	2	1	3	3	2	2	2	3.25	3.75	3
869	0	10	1	Xishuangbanna	Shiji	5	5	4	5	4	5	4	5	5	4	5	4	5	4	4	3	5	5	5	4	3	4	3	4	3	4	3	4	4	3	3	4	4	5	3	3	3	3	3	4	4	3	5
870	1	10	1	Xishuangbanna	Shiji	5	4	5	5	5	5	5	5	5	4	5	4	5	4	5	3	3	5	4	2	3	4	4	4	3	3	3	4	3	1	1	4	2	3	3	4	4	4	5	5	4	4	5
871	1	10	1	Xishuangbanna	Yixiao	5	5	5	5	4	4	4	4	3.75	4	3	3	3	3	4.75	3	4.75	5	4	2	1	1	4	4	1	1	3	4	3	2	1	3	3	5	4	5	5	5	3	4	3	2	4
872	0	10	1	Hangzhou	Fenghuang	5	5	5	5	5	5	5	5	5	5	5	5	5	5	5	5	5	5	5	5	5	5	5	5	5	5	3	5	4	2	1	5	3	3	2	5	5	5	5	5	5	5	5
873	1	10	1	Hangzhou	Fenghuang	5	5	5	5	5	5	5	5	5	3	5	5	4	2	5	4	3	5	3.5	3	2	4	4	5	1	1	3	5	5	1	3	5	5	5	1	5	5	5	5	5	5	5	5
874	0	10	0	Kunming	Zhugou	5	5	5	5	5	5	5	5	5	5	4	5	5	3	3	3	3	5	5	3	1	1	3.5	5	2	1	3	5	3	1	2	5	1	5	1	5	3	5	3.25	3	4	5	1
875	1	10	0	Xishuangbanna	Changle	5	4	5	5	5	4	5	5	3	5	5	3	5	4	4	5	5	5	5	3	2	5	5	5	3	3	3	4	1	1	1	5	1	5	2	5	5	4	5	4	5	5	4
876	1	10	0	Xishuangbanna	Zhongxin	5	5	4	3	5	5	5	4	5	3	5	5	5	3	5	2	3	5	5	4	4	5	4	5	2	5	3	4	5	2	1	5	5	5	5	3	5	3	4	2	2.5	5	3
877	0	10	1	Xishuangbanna	Shiji	4	5	4	4	5	4	5	5	4	4	3	4	3	3	4	4	5	5	4.75	3	2	2	3	5	2.5	2	3	4	2	1	1	3	2	3	1	2	2	1	1	4	3	4	5
878	0	10	1	Xishuangbanna	Shiji	4	5	5	5	5	5	5	4	4	5	5	4	4	4	5	3	5	5	4	5	5	4	4	5	4	5	3	5	5	2	1	5	3	4	2	5	5	4	5	4	5	5	4
879	0	10	1	Xishuangbanna	Shiji	5	5	5	5	5	3	5	4	5	4	4	4	4	3	4	4	5	5	3	5	5	5	5	5	3	3	3	5	2	3	1	5	4	5	1	5	5	5	5	3	5	5	4
880	0	10	1	Xishuangbanna	Yixiao	5	5	5	5	5	5	5	5	5	5	5	5	5	5	5	5	5	5	5	4	5	5	5	5	4	3	3	5	4	1	1	5	5	5	4	3	3	3	3	4	5	4	4
881	0	10	1	Xishuangbanna	Yixiao	5	4	5	5	5	5	5	5	5	5	5	5	5	3	3	5	3	5	5	5	3	3	5	5	5	5	3	4	2	2	1	4	4	4	4	3	3	3	3	5	5	5	5
882	1	10	1	Xishuangbanna	Shiji	4	3	5	5	5	5	5	4	5	3	5	4	5	4	5	3	5	5	5	4	4	5	4	5	4	4	3	5	4	1	3	4	3	4	3	5	5	4	5	4	5	4	4
883	1	10	1	Xishuangbanna	Shiji	4	5	5	5	5	5	5	5	5	3	5	3	5	4	5	4	5	5	5	5	3	3	4	5	1	2	3	4	3	1	1	4	1	4	1	3	3	2	3	5	5	5	4
884	1	10	1	Xishuangbanna	Yixiao	5	5	5	5	5	5	5	5	5	5	5	1	5	4	5	5	5	5	5	5	5	5	5	5	5	5	3	4	4	4	1	5	5	3	3	5	5	5	5	5	5	5	5
885	1	10	0	Xishuangbanna	Changle	4	3	5	4	3	3	4	5	4	3	2	5	5	4	4	5	3	2	2	2	5	2	3	5	2	5	4	5	3	2	2	4	2	3	2	3	5	3	2	4	4	4	2
886	0	10	1	Kunming	Wuhua	5	4	5	4	3	4	3	3	5	3	4	4	5	3	4	1	4	3	4	2	2	1	2	2	1	1	4	5	4	1	3	1	2	3	1	4	2	2	1	5	2	1	2
887	0	10	1	Hangzhou	Fenghuang	4	5	5	2	5	4	4	4	5	5	5	4	5	3	4	2	2.75	3	3	3	4	3	4	2.5	1	5	4	5	5	3	1	3	5	2	1	5	5	5	5	5	5	5	5
888	1	10	1	Hangzhou	Fenghuang	3	5	4	5	3	3	5	3	5	3	5	5	5	3	3	3	3	3	3	3	3	3	3	3	3	3	4	5	4	4	1	5	3	5	3	3	3	5	5	5	5	3	5
889	1	10	1	Xishuangbanna	Yixiao	4	2	4	4	5	4	4	4	3	3	3	2	5	4	4	3	5	3	5	4	3	5	4	3	2	2	4	4	3	2	3	2	4	5	3	3	3	4	4	2	4	2	5
890	1	10	1	Kunming	Wuhua	3	5	5	4	5	5	4	4	3	5	4	3	4	4	3	3	4	3	5	2	2	5	2	4	2	2	4	5	1	1	4	1	4	1	1	5	5	4	5	5	1	3	1
891	1	10	1	Kunming	Yunda	5	5	5	4	4	5	5	4	4	5	5	4	5	4	4	3	3	3	5	4	4	4	5	5	5	5	4	5	5	3	4	5	4	4	3	5	4	4	4	4	4	5	5
892	1	10	0	Kunming	Erjie	3	5	5	5	4	3	3	4	4	2	1	3	4	3	3	2	1	4	3	4	3	1	1	1	1	1	4	1	3	2	3	1	5	1	2	2	2	1	2	1	1	1	2
893	1	10	0	Kunming	Erjie	5	5	4	5	5	5	4	3	3	2	3	5	5	3	2	4	5	4	5	3	2	4	1	1	4	5	4	3	5	4	2	2	5	4	2	5	2	5	5	4	3	4	3
894	1	10	1	Kunming	Wuhua	4	5	5	5	4	4	3	3	2	5	1	3	4	1	3	2	4	4	2	1	1	2	1	1	2	3	4	1	2	1	3	2	2	1	1	5	4	5	5	2	1	1	1
895	0	10	1	Hangzhou	Shengli	5	5	5	5	5	5	5	5	5	5	5	5	3	3	3	4	3	4	2	4	3	3	2	2	1	1	4	3	4	2	4	3	1	2	3	3	2	3	3	3	4	2	2
896	0	10	1	Hangzhou	Fenghuang	5	4	5	3	4	3	5	5	4	5	4	4	4	3	3	2	2	4	3	2	3	2	2	2	2	2	4	4	4	1	1	3	1	2	4	2	2	3	2	3	5	3	2
897	0	10	1	Kunming	Lianhua	5	5	5	4	3	5	5	4	5	4	5	4	5	3	4	3	2	4	3	2	2	2	3	2	1	1	4	2	3	3	4	5	2	2	3	4	4	4	2	4	4	4	4
898	0	10	0	Xishuangbanna	Changle	5	3	5	4	4	5	5	4	5	5	3	5	5	3	4	3	3	4	4	2	2	5	3	2	2	2	4	4	2.75	2	2	2	3	4	3	3	3	2	2	5	4	3	2
899	0	10	0	Xishuangbanna	Zhongxin	4	5	5	4	5	4	5	4	4	3	3	5	4	3	4	5	3	4	5	5	1	5	4	2	3	3	4	5	2	1.5	3	2	3	5	5	5	5	5	5	5	5	3	2
900	1	10	0	Xishuangbanna	Zhongxin	4	4	4	4	5	5	5	5	5	4	5	5	5	4	4	2	4	4	4	5	1	4	5	2	2	2	4	5	1	1	3	4	4	4	4	2	4	3	2	2	2	1	4
901	0	10	0	Xishuangbanna	Zhongxin	5	4	4	3	3	2	5	4	3	5	5	1	4	4	5	4	4	4	4	3	3	2.25	4	2.25	1.25	4	4	5	3	4	2	4	3	5	3	5	3.5	3	5	4	4	5	4
902	0	10	0	Kunming	Zhugou	4	2	5	5	5	5	1	4	5	4	4	1	4	4	2	5	5	4	4	5	2	4.75	5	4	5	4	4	4	3	2	1	4	1	3	2	4	4	4	4	5	3	3	2
903	1	10	1	Kunming	Wuhua	5	3	5	5	5	5	4	5	5	5	5	4	5	3	5	5	4	4	5	3	1	3	2	4	1	1	4	3	3	1	3	5	3	4	5	3	3	2	2	3	2	4	3
904	1	10	0	Xishuangbanna	Zhongxin	3	5	4	5	4	4	5	3	4	5	5	3	3	4	3	4	5	4	3	5	4	4	5	4	4	5	4	5	5	4	1	5	2	4	1	5	5	4	5	4	5	4	3
905	1	10	1	Kunming	Yunda	5	5	5	5	5	5	4	4	4	4	5	4	5	4	4	5	5	4	5	4	5	5	5	5	4	5	4	5	5	4	3	5	4	5	3	5	5	5	5	5	5	5	4
906	0	10	1	Xishuangbanna	Yixiao	5	5	5	3	5	4	5	4	4	4	5	4	5	4	4	5	4	4	5	5	5	5	5	5	4	4	4	4	5	4	3	4	4	4	4	5	5	5	4	4	4	5	5
907	0	10	1	Hangzhou	Shengli	5	5	5	4	5	5	5	5	5	4	4	4	5	4	5	3	5	5	5	2	3	2	4	2	2	4	4	3	3	1	2	5	4	4	1	2	2	3	2	4	4	2	5
908	1	10	0	Kunming	Erjie	4	4	4	5	5	5	5	5	4	5	5	4	5	3	5	4	5	5	2	4	1	4	3.25	2	1	1	4	2	2	1	2	4	1	4	2	1	1	1	1	4	3	5	2
909	1	10	0	Kunming	Zhugou	4	5	5	5	4	5	4	3	4	5	5	4	4	4	4	3	3	5	5	3	3	4	2	2	3	3	4	3	3	1	2	3	2	5	3	5	4	4	5	4	4	2	3
910	0	10	1	Kunming	Wuhua	5	5	5	3	5	4	1	3	3	3	4	3	5	3	4	3	2	5	4	3	3	3	2.5	2	2	3	4	3	4	1	1	3	1	2	2	4	4	3	4	2	2	3	4
911	1	10	1	Kunming	Lianhua	5	5	5	5	5	5	5	5	5	5	5	5	5	3	4	2	3	5	4	5	2	3	4	2	2	3	4	3	5	5	1	5	2	3	1	4	5	4	5	5	4	5	3
912	0	10	0	Hangzhou	Nanshan	4	4	5	5	5	5	5	5	5	5	5	5	5	4	4	5	5	5	4	4	3	3.25	3	3	1	1	4	3	5	5	2	5	3	2	4	2	2	3	3	5	3	3	4
913	0	10	0	Kunming	Erjie	5	5	5	5	5	5	5	3	3	5	5	3	3	4	5	5	4	5	5	4	4	3	4	3	5	4	4	3	1	2.75	3	3.5	3	2	1	4	2	2	4	2	2	2	2
914	1	10	0	Kunming	Erjie	5	5	5	5	5	5	3	4	4	3	4	5	5	3	4	1	3	5	4	2	1	4	1	3	1	1	4	2	3	3	1	4	1	3	3	3	3	3	3	3	3	4	5
915	0	10	1	Kunming	Yunda	5	5	5	5	5	5	5	5	5	5	5	5	5	4	5	3	3	5	5	3	3	3	3	3	4	3	4	5	5	5	4	3	1	4	3	5	5	5	5	5	5	5	5
916	1	10	1	Kunming	Lianhua	5	5	5	2	4.25	2	4	5	4	3	5	5	4	1	5	1	1	5	2	3.75	1	4	5	3	1	1	4	4	4	1	4	3	1	5	1	2	2	5	2	1	5	1	1
917	1	10	1	Kunming	Wuhua	5	5	4	4	4	4	5	3	3	4	5	3	4	3	4	3	4	5	3	3	4	3	4	3	3	3	4	4	3	3	4	4	3	4	3	3	4	3	2	2	3	3	3
918	1	10	1	Kunming	Wuhua	5	1	5	1	1	3	5	3	2	4	5	1	5	3	1	4	1	5	4	5	5	5	5	4	5	2	4	3	5	4	2	4	5	1	5	1	1	1	5	1	1	1	5
919	0	10	0	Hangzhou	Nanshan	5	4	5	5	5	5	4	5	5	3	4	4	5	4	3	5	3	5	4	4	4	5	3	5	1	4	4	5	3	1	2	4	2	5	2	4	3	5	4	4	2	3	5
920	0	10	0	Hangzhou	Lijia	5	4	5	4	5	5	3	5	4	5	5	5	5	4	5	5	5	5	5	4	5	5	4	5	5	4	4	5	5	3	3	5	1	5	3	4	5	5	2.75	4	2	3	5
921	0	10	1	Hangzhou	Cuiyuan	5	5	5	5	5	5	4	4	4	5	3	5	3	2	4	4	5	5	4	4	3	5	5	5	1	1	4	5	4	2	4	4	1	5	1	5	5	5	2.75	4	4	3	3
922	1	10	1	Kunming	Wuhua	5	5	5	5	5	5	5	5	5	5	5	5	5	4	5	5	5	5	5	3	5	4	4	5	4	3	4	5	5	3	1	4	4	3	3	5	5	5	5	5	5	5	5
923	1	10	0	Xishuangbanna	Changle	4	5	4	5	5	5	3	5	5	3.5	5	4	3	4	5	5	4	5	4	5	5	4	5	5	5	5	4	5	3	5	2	4	5	4	4	4	5	5	4	5	3	5	5
924	0	10	1	Xishuangbanna	Yixiao	5	5	5	5	5	5	5	5	5	5	5	5	5	5	5	5	5	5	4	5	4	5	4	5	5	5	4	5	4	5	4	5	2.5	4	5	4	4	4	4	4	5	5	5
925	1	10	1	Xishuangbanna	Shiji	5	4	5	5	5	5	5	5	5	5	5	5	5	5	5	5	5	5	5	5	5	5	5	5	3	4	4	5	3	2	4	5	3	5	5	5	5	5	5	5	3	4	3
926	1	10	1	Xishuangbanna	Shiji	5	5	5	5	4	5	5	5	5	5	5	5	4	4	5	5	5	5	5	4	4	5	3	5	4	3	4	5	2	1	4	5	5	5	5	5	5	5	4	4	5	5	5
927	1	10	1	Kunming	Lianhua	5	4	1	3	5	4	3	2	1	4	5	2	5	2	3	4	5	1	3	2	2	1	3	2	1	1	5	5	3	4	1	1	2	3	2	4	4.25	2	3	1	2	4	3
928	0	10	0	Xishuangbanna	Zhongxin	5	5	5	1	5	1	5	4	4	2	1	5	5	5	4	5	3	1	5	5	2	1	5	5	5	5	5	5	1	1	4	5	3	3	1	5	5	3.25	3	1	1	5	5
929	0	10	1	Xishuangbanna	Shiji	5	5	5	3	3	1	4	3	1	1	3	2	3	1	2	1	2	2	1	3	1	1	1	1	1	1	5	5	5	5	3	3	5	1	5	3	3	1	1	3	5	1	2
930	0	10	0	Hangzhou	Nanshan	5	5	5	5	5	5	5	5	5	5	5	4	4	5	5	2	5	2	4	5	2	5	4	2	1	3	5	4	5	1	2	4	1	5	1	2	2	4	2	5	1	4	2
931	1	10	0	Kunming	Zhugou	1	5	3	5	4	2	5	4	3	2	5	3	5	2	4	5	4	2	3	3	1	4	5	3	4	2	5	5	5	1	3	5	5	5	1	5	5	1	5	1	1	5	5
932	1	10	0	Hangzhou	Lijia	4	2	4	2	2	3	4	3	3	5	3	4	4	4	2	3	3.25	2	3	3	4	2	3	4	2	3	5	1	3	4	3	5	3	3	2	3	3	3	3.25	4	3	3	3
933	0	10	0	Kunming	Zhugou	4	4	4	4	4	4	4	3	4	3	4	4	4	3	4	3	2	3	4	4	3	4	1	1	1	1	5	5	3	4	5	1	2	2	1	3	1	1	1	3	2	2	3
934	1	10	0	Xishuangbanna	Erxiao	5	5	4	4	4	5	3	4	3	3	5	5	4	2	3	2	2	3	3	1	1	2	3	1	2	2	5	3	1	2	1	5	4	2	1	2	2	3	5	2	2	2	3
935	1	10	0	Kunming	Zhugou	4	5	5	4	5	4	5	4	4	5	4	5	5	3	4	4	3	3	3	2	3	3	3	1.75	1.75	4	5	4	1	4	5	2	3	3	4	5	3	4	1	1	3	1.25	4
936	0	10	0	Kunming	Zhugou	4	2	5	3	5	5	4	5	5	5	4	4	5	3	3	3	4	3	5	3	3	5	3	3	1	1	5	3	4	4	4	5	3	2	4	2	2	2	2	2	5	2	4
937	0	10	1	Kunming	Lianhua	3	5	4	3	4	5	5	4	3	2	3	2	4	3	4	4	5	3	3	2	5	2	4	3	2	2	5	4	4	3	3	3	4	3	5	3	3	4	3	5	3	2	4
938	1	10	0	Hangzhou	Nanshan	3	3	4	4	5	5	3	4	3	5	3	2	4	2	2	4	4	3	5	1	1	1	3	4	1	4	5	5	5	5	3	2	1	1	3	3	2	2	3	4	1	2	4
939	0	10	0	Xishuangbanna	Zhongxin	5	4	5	1	5	5	5	5	5	5	3	1	5	2	4	4	2	3	4.5	1	2	2	3	5	1	3	5	5	1	1	2	5	2	3	4	4	2	4	2	5	3	4	1
940	1	10	0	Xishuangbanna	Erxiao	4	3	5	5	5	4	5	4	4	3	4	5	4	3	4	4	3	4	3	2	1	3	3	1	4	4	5	4	4	5	2	4	5	4	3	4	4	4	1	2	2	2	5
941	1	10	0	Hangzhou	Lijia	5	5	5	5	4	3	5	4	5	3	5	3	4	3	4	4	3	4	3	3	2	3	3	2	1	1	5	5	4	5	2	3	4	2	1	2	2	1	3	4	3	3	3
942	1	10	1	Kunming	Wuhua	3	5	5	5	5	4	5	5	3	5	5	5	5	3	5	2	3	4	4	5	2	5	3	3	1	1	5	3	5	5	2	5	5	5	5	3	3	3	5	5	5	5	5
943	1	10	1	Kunming	Yunda	5	5	5	5	5	5	5	5	5	5	5	4	5	2	3	5	4	4	4	3.25	4	3	5	3	2	2	5	4	4	2	2	4	3	3	5	5	4	5	5	5	5	5	5
944	0	10	1	Xishuangbanna	Yixiao	5	5	4	3	4	4	4	5	4	5	4	4	4	4	4	3	4	4	4	4	4	4	5	3	3	3	5	5	5	5	4	5	5	5	5	5	5	5	5	4	4	5	4
945	1	10	1	Hangzhou	Fenghuang	5	5	5	4	5	4	4	5	4	5	5	5	4	4	4	5	4	4	4	5	4	5	5	4	4	5	5	4	5	4	4	5	5	5	4	5	5	5	5	4	5	3	3
946	1	10	1	Hangzhou	Fenghuang	5	4	5	4	5	5	4	3	4.25	3	2	5	5	3	2	5	4	4	4	1	4	5	5	4	5	4	5	2	4	5	2	3	4	3	3	4	5	5	3	5	3	4	5
947	1	10	0	Kunming	Erjie	4	2	5	3	5	5	5	5	5	4	4	4	4	4	5	5	5	4	5	5	4	5	2	4	4	5	5	5	2	4	2	4	2	4	5	2	1	4	3	4	4	3	4
948	1	10	0	Kunming	Erjie	4	4	4	4	4.5	5	4	5	3	4	3	4	4	3	5	5	4	4	4	5	2	5	2	4	1	1	5	3	2	1	1	5	1	3	1	5	1.5	1	1	3	5	5	3
949	0	10	1	Kunming	Wuhua	4	4	5	5	5	5	3	4	4	3	5	4	3	3	3	4	5	4	5	3	1	2	3	4	2	4	5	5	5	4	4	5	5	3	5	5	5	5	3.75	2.25	4	5	2
950	1	10	0	Xishuangbanna	Zhongxin	4	5	4	5	5	4	5	4	5	4	4	5	5	3	4	5	4	4	3	4	3	4	3	4	4	5	5	4	5	4	4	5	4	3	2	4	4	5	5	5	4	4	5
951	1	10	0	Xishuangbanna	Erxiao	5	4	4	3	4	4.25	5	5	5	4	4	5	4	4	4	5	5	4	4	4	4	4	5	4	5	5	5	4	2	1	2	4	5	5	1	4	4	4	4	5	4	5	5
952	0	10	1	Hangzhou	Shengli	5	5	5	5	5	5	5	5	5	5	5	5	5	5	5	5	5	4	5	3	2	3	5	5	5	5	5	5	5	1	2	5	2	5	2	5	5	5	5	5	5	5	5
953	0	10	1	Kunming	Wuhua	5	5	5	5	5	5	4.5	4	5	4	5	1	5	3	5	4	5	4	5	3	3	4	2	5	5	5	5	4	3	2	4	5	3	3	4	3	2	5	5	2	3	5	4
954	1	10	0	Xishuangbanna	Zhongxin	1	1	5	5	5	5	5	4	5	5	5	5	5	5	5	4	4	4	5	4	4	4	4	5	5	5	5	5	5	5	2	4	4	4	3	2	4	4	4	4	5	5	5
955	1	10	0	Kunming	Zhugou	4	5	5	5	5	3	5	1	1	3	1	5	4	5	4	4	5	5	5	2	5	5	5	1	1	1	5	5	5	5	3	2	5	2	1	2	1	1	1	4	1	1	2
956	0	10	1	Xishuangbanna	Shiji	5	3	5	4	5	4.5	4	5	5	5	3	5	3	2	5	4	5	5	5	4	2	2	4	1	3	4	5	4	5	2	4	3	5	3	4	4	4	3	5	3	3	2	1
957	1	10	1	Xishuangbanna	Yixiao	5	5	5	5	5	5	5	5	5	5	5	5	5	4	5	2	5	5	5	5	2	5	3	1	1	1	5	5	5	1	3	5	5	5	5	5	5	1	5	5	5	5	1
958	1	10	1	Hangzhou	Shengli	5	5	5	5	5	5	5	5	5	5	5	5	5	3	4	2	2	5	5	4	2	4	2	2	1	1	5	5	5	1	4	5	1	5	1	5	5	5	5	4	3	2	3
959	0	10	1	Kunming	Lianhua	5	5	5	3	4	5	4	4	3.25	3.25	5	3	4	3	3	3	2	5	3	5	1	3	3	2	1	1	5	4	3	3	3	4	2	2	3	5	5	3	3.25	3	1	1	1
960	1	10	1	Kunming	Yunda	5	5	5	3	4	3	4	4	3	4	5	4.5	4	3	4	4	3	5	4	4	2	1	3	2	1	1	5	4	4	5	2	5	3	4	2	4	4	4	4	5	5	3	4
961	0	10	0	Xishuangbanna	Erxiao	3	1	4	5	4	5	5	4	5	5	4	5	5	2	5	2	5	5	5	2	2	5	3	2	3	5	5	2	1	1	3	2	5	5	1	2	2	2	5	5	4	5	5
962	0	10	0	Hangzhou	Nanshan	4	4	4	5	5	5	4	4	4	5	5	5	5	4	3	4	4	5	4	4	4	4	4	3	1	1	5	5	5	5	2	5	4	5	4	5	5	5	5	5	5	5	5
963	1	10	0	Hangzhou	Lijia	5	1	4	3	4	4	5	4	5	4	5	3	5	4	5	3	3	5	5	4	1	3	3.75	3	1	1	5	3	2	1	4	5	4	3	1	4	3	5	5	4	4	5	4
964	1	10	1	Hangzhou	Shengli	4	5	5	4	5	5	5	3	3	5	5	1	5	4	3	5	5	5	2	5	2	4	2	3	1	1	5	5	5	1	4	5	1	5	1	5	2	5	5	3	5	2	5
965	1	10	0	Kunming	Erjie	5	2	5	5	5	5	4	5	3	5	5	4	5	4	5	5	5	5	5	4	3	4	5	3	3	3	5	2	3	1	2	5	1	5	5	5	4	3	4	2	2	5	5
966	0	10	0	Xishuangbanna	Zhongxin	4	3	4	3	4	4	5	4	3	3	3	4	3	3	3	3	4	5	5	2	2	2	2	3	1	1	5	2	1	3	1	3	5	2	5	2	4	4	2.5	1	2	3	1
967	0	10	0	Xishuangbanna	Zhongxin	4	5	5	4	5	3	5	3	5	4	5	4	3	3	4	2	2	5	5	3	3	3	2	3	2	3	5	5	2	3	1	5	4	4	3	2	4	1	2	4	4	5	2
968	0	10	0	Xishuangbanna	Zhongxin	5	5	3	5	5	5	5	5	5	5	5	3	4	3	5	5	5	5	5	5	3	5	5	3	3	3	5	5	3	4	3	5	3	5	4	5	5	5	2	5	4	2	5
969	1	10	0	Xishuangbanna	Zhongxin	5	5	5	5	5	5	5	5	5	5	5	5	5	4	5	3	5	5	4	5	4	5	5	3	5	5	5	5	5	5	3	2	3	4	4	5	5	5	1	4	5	3	4
970	0	10	0	Hangzhou	Nanshan	5	5	5	5	5	5	5	5	5	4	5	5	5	4	4	3	5	5	5	4	3	4	4	4	1	1	5	5	5	5	3	5	2	4	4	5	5	5	5	5	3	3	4
971	1	10	1	Hangzhou	Fenghuang	4	5	5	4	3	5	4	5	5	5	5	5	4	4	3	2	3	5	5	5	5	3	5	4	4	4	5	5	5	5	1	5	1	5	1	3	3	5	4	3	4	2	3
972	1	10	0	Kunming	Erjie	5	5	5	5	5	5	5	5	5	5	5	5	5	3	4	4	3	5	2	2	4	4	5	4	1	1	5	4	5	1	2	2	1	4	5	5	1	1	1	2	1	1	4
973	1	10	0	Kunming	Zhugou	4	3	5	4	4.75	4.5	4	3	4	3	2	3	3	3	4	5	4	5	5	2	3	2	2	4	4	3	5	3	4	4	1.75	2	4	3	2	4	3	4	2	2	3	2	4
974	1	10	1	Kunming	Lianhua	3	4	5	4	4	4	3	3	5	5	5	1	5	4	3	3	3	5	5	4	1	1	5	4	1	1	5	5	4	4	2	5	1	3	5	2	5	5	5	1	1	2	3
975	1	10	1	Kunming	Yunda	4	5	5	4	5	5	5	5	5	5	4	4	5	4	5	4	5	5	5	5	4	4	5	4	4	4	5	5	5	4	3	5	3	5	3	5	5	5	5	4	5	5	4
976	1	10	0	Xishuangbanna	Zhongxin	3	1	5	5	1	4	5	4	3	2	3	5	5	2	5	3	4	5	3.25	3	2	1	3.5	4	4	2	5	5	3.25	4	3	2	1	3	2	3	4	3	4	2	3	5	5
977	1	10	1	Xishuangbanna	Shiji	5	5	5	5	5	4	4	5	5	4	5	5	5	3	5	3	5	5	5	5	4	3	5	4	4	4	5	4.25	3	1	1	4	4	5	4	2	3	2	3	5	5	5	4
978	1	10	0	Hangzhou	Lijia	5	1	5	5	5	5	5	5	5	5	5	5	5	5	5	5	5	5	5	5	5	5	5	5	5	5	5	5	5	5	3	5	5	5	5	5	5	5	5	5	5	5	5
979	0	10	1	Hangzhou	Fenghuang	5	5	5	5	5	5	4	5	5	3	5	5	5	3	4	3	3	5	3	5	2	5	5	5	1	1	5	4	3	1	3	5	2	1	1	4	4	4	4	4	4	3	4
980	0	10	1	Hangzhou	Fenghuang	5	5	5	5	5	5	5	5	5	5	5	5	5	3	3	4	2	5	5	3	1	5	5	5	5	3	5	5	5	5	1	5	5	5	5	5	5	5	5	5	2	4	5
981	1	10	1	Hangzhou	Cuiyuan	1	1	5	4	1	1	1	3	2	2	5	5	5	3	5	3	5	5	3	1	5	5	5	5	3	5	5	5	5	5	1	5	5	5	5	5	5	4	5	1	5	5	5
982	1	10	0	Kunming	Zhugou	5	5	5	1	5	5	1	5	1	5	5	1	5	5	5	5	5	5	5	1	5	5	1	5	5	1	5	1	5	1	1	5	1	5	1	1	5	5	5	1	5	5	1
983	0	10	1	Kunming	Yunda	5	5	5	5	5	5	4	4	5	4	5	4	5	4	4	5	4	5	5	3	3	4	5	5	3	5	5	3	4	3	2.75	5	3	4	3	4	4	4	5	5	3	4	5
984	1	10	1	Kunming	Wuhua	5	4	5	5	5	5	5	4	3	5	4	4	5	2	4	3	5	5	5	5	5	3	5	5	5	5	5	5	5	1	3	4	1	5	1	4	4	4	4	3	4	5	5
985	1	10	0	Xishuangbanna	Erxiao	5	5	5	5	5	4	5	4	4	5	5	5	5	3	5	4	5	5	5	5	5	4	5	5	4	5	5	5	5	5	1	5	1	5	1	2	3	3	2	3	5	5	5
986	0	10	1	Xishuangbanna	Shiji	5	5	5	4	5	5	3	4	5	4	4	4	4	5	5	5	5	5	5	4	4	5	5	5	5	5	5	5	3	3	3	5	4	5	5	5	4	5	5	5	5	4	5
987	0	10	1	Xishuangbanna	Shiji	5	3	5	5	5	3	5	5	5	3	5	4	5	5	4	5	5	5	5	5	5	5	5	5	5	3	5	2	5	4	2	4.75	5	5	5	5	5	5	4	3	5	4	5
988	1	10	1	Xishuangbanna	Shiji	5	4	5	5	5	4	5	5	5	5	5	5	5	5	5	5	5	5	5	4	4	1	5	5	3	5	5	5	5	5	2	4	5	3	5	5	5	5	5	5	1	1	5
989	1	10	1	Xishuangbanna	Yixiao	3	4	4	5	5	5	5	5	5	4	4	1	5	5	5	5	5	5	5	1	2	5	4	5	1	1	5	5	4	5	2	5	1	4	5	5	4	4	4	5	3	3.25	3
990	0	11	1	Hangzhou	Fenghuang	5	5	5	5	5	1	1	5	5	5	5	1	1	1	1	1	1	1	1	1	1	1	1	1	1	1	1	5	5	5	2	5	5	5	5	5	5	5	5	5	1	5	1
991	1	11	0	Kunming	Erjie	5	5	5	4	4	4	3	3	2	2	4	3	3	2	3	2	2	1	2	1	1	2	1	1	1	1	1	2	3	1	4	3	1	2	5	2	2	1	1	2	2	2	2
992	1	11	0	Xishuangbanna	Changle	2	3	4	2	5	4	1	5	2	4	1	3	1	1	3	2	5	1	2	3	5	2	4	1	3	1	1	3	1.5	4	5	5	3	1	4	4	4	1	2	3.5	3	2	3
993	1	11	0	Xishuangbanna	Erxiao	4	4	4	3	3	4	3	3	3	2	3	3	3	1	3	1	2	2	2	1	1	1	1	1	1	1	1	2	1	1	4	2	1	3	2	1	1	1	1	2	1	1	1
994	1	11	1	Xishuangbanna	Shiji	4	4	5	4	4	3	5	5	3	4	5	3	4	3	3	2	2	2	4	3	1	1	2	1	1	1	1	1	1	1	5	3	2	2	4	3	3	3	3	4	2	2	2
995	1	11	1	Hangzhou	Shengli	5	2	5	3	4	3	4	3	3	2	2	4	3	2	2	2	2	2	2	2	2	2	2	2	2	2	1	1	3	3	2	1	1	1	1	2	2	1	1	1	3	1	4
996	0	11	1	Kunming	Lianhua	5	5	5	4	5	4	5	4	4	3	4	1	4	3	3	2	2	2	2	1	1	5	5	2	1	1	1	5	3	1	4	2	1	1	1	1	5	3	2	2	1	1	2
997	0	11	0	Xishuangbanna	Zhongxin	4	5	5	4	4	5	5	5	5	3	5	3	4	2	5	4	3	2	4	2	2	4	5	2	1	1	1	5	2	1	3	3	2	2	1	3	5	5	5	3	2	3	4
998	1	11	0	Xishuangbanna	Changle	5	5	5	3	5	2	4	5	3	3	4	3	5	2	3	2	4	2	2.5	1	2	4	2	2.5	1	2.25	1	4	1	1	5	2	1	2	3	3.5	2	1	1	4	1	1	3
999	1	11	0	Xishuangbanna	Changle	3	4	4	4	3	5	5	2	1	5	4	1	5	4	5	3	4	2	2	2	2	4	5	3	1	1	1	2	2	1	5	2	1	2	1	3	2	2	1	5	5	2	5
1000	0	11	1	Kunming	Wuhua	3	3	4	3	4	3	4	3	3	3	3	3	4	2	4	3	3	3	3	2	2	3	2	1	1	2	1	3	3	1	1	2	1	3	2	3	2	3	3	3	2	2	1
1001	0	11	0	Hangzhou	Lijia	5	4	5	4	4	4	4	4	4	3	4	3	4	3	4	3	4	3	3	3	3	3	3	2	2	2	1	3	3	1	1	3	1	3	1	2	1	1	2	3	3	3	3
1002	1	11	0	Hangzhou	Nanshan	5	4.5	5	5	5	5	4	4	4	4	5	5	5	3	5	5	4	3	5	3	2	3	3	2	1	1	1	3	3	1	1	5	3	3	1	2	3	4	3	4	3	1	4
1003	0	11	1	Hangzhou	Shengli	5	5	5	5	5	5	5	5	5	5	5	5	5	5	5	4	5	3	5	2.5	2	3	5	2	1	1	1	5	3	1	2.75	3	1	5	5	2	2	2	2	5	5	5	5
1004	0	11	1	Hangzhou	Cuiyuan	3	4	5	5	5	4	5	5	5	5	5	5	3	2	3	3	3	3	3	4	3.5	1	5	2	1	1	1	1	3	2	2	2	5	5	5	5	5	5	5	5	5	5	5
1005	1	11	1	Hangzhou	Shengli	5	5	5	4	3	4	5	1	1	3	4	2	1	4	5	3	4	3	2	2	2	2	2	2	1	1	1	2	2	1	1	3	1	2	1	2	2	3	2	2	4	2	3
1006	1	11	0	Xishuangbanna	Changle	5	5	5	4	5	4	4	4	5	5	4	5	4	3	3	2	4	3	4	3	2	4	3	2	2	1.75	1	4	1	1	5	4	1	5	4	2	4	2	2	5	3	2	2
1007	1	11	0	Xishuangbanna	Zhongxin	4	5	5	4	5	4	5	4	3	3	4	3	4	2	3	1	4	3	3	5	1	3	2	2	1	1	1	2	1	1	4	2	1	3	1	1	2	2	1	1	2	1	4
1008	1	11	0	Xishuangbanna	Erxiao	5	5	5	5	5	5	5	5	5	5	5	5	5	2	4	2	2	3	1	1	1	2	4	2	1	1	1	4	1	1	5	2	3	4	1	4	4	2	1	3	4	4	3
1009	1	11	0	Kunming	Zhugou	3	5	5	5	4	4	1	4	3	4	3	2	4	3	2	4	5	3	4	2	2	4	1	3	2	2	1	3	2	1	3	1	1	4	1	3	3	3	3	3	3	4	3
1010	0	11	1	Kunming	Wuhua	4	4	4	5	4	5	3	3	5	3	4	4	4	3	4	2	5	3	4	1	1	1.75	3	3	2	2	1	2	1	1	3	1	1	1	1	2	1	1	1	2	2.25	3	3
1011	0	11	1	Kunming	Wuhua	5	5	5	5	5	5	5	5	5	5	5	5	5	3	3	3	3	3	3	3	3	3	3	3	1	1	1	4	4	1	1	4	1	1	4	4	4	4	4	4	4	4	4
1012	1	11	1	Kunming	Lianhua	3	4	2	2	4	3	3	2	3	3	2	3	4	3	3	1	1	3	4	4	2	2	1	3	3	3	1	1	2	1	4	1	1	1	1	1	1	1	1	1	1	1	1
1013	1	11	1	Kunming	Lianhua	4	5	5	5	5	5	5	5	5	3.75	4.5	3	5	5	5	4	5	3	4	2	2	2	5	3	2	3	1	5	5	1	4	3	1	4	2	5	5	5	5	3	3.75	5	2
1014	1	11	0	Xishuangbanna	Changle	3	4	4	3	4	5	3	3	2	2	3	3	4	2	3	1	2	3	2	1	1	2	1	3	1	1	1	1	2	1	1	3	2	2	2	1	4	1	1	1	2	1	1
1015	1	11	0	Xishuangbanna	Zhongxin	5	5	5	5	5	5	5	5	5	5	5	5	5	3	4	4	3	3	3	4	4	3	4	3	4	3	1	4	1	1	2	4	4	4	4	3	4	2	2	3	4	1	2
1016	1	11	1	Kunming	Lianhua	4	5	5	5	5	4	4	4	3	5	5	5	5	3	3	4	2	3	5	1	1	2	4	4	1	1	1	4	2	1	1	5	1	4	2	2	2	3	3	5	5	1	4
1017	0	11	1	Hangzhou	Shengli	5	5	5	5	5	5	4	5	5	3	3	5	3	5	5	5	5	3	5	2	2	4	5	5	1	1	1	5	5	1	2	5	1	3	1	5	5	5	5	5	5	3	5
1018	0	11	0	Hangzhou	Lijia	3	5	4	5	5	4	3	4	5	4	5	3	5	3	3	2	4	4	3	2	2	2	1	1	1.75	1	1	3	5	1.25	3	5	2	2	3	2	1	1	1	3	5	2	2
1019	0	11	1	Hangzhou	Shengli	3	5	4	4	5	3	5	3	3	5	3	4	5	2	2	1	3	4	3	1	1	1	2	1	1	1	1	3	3	1	2	2	1	1	1	2	1	2	1	2	4	1	1
1020	0	11	1	Hangzhou	Shengli	4	5	5	4	5	4	5	3	3	3	5	3	4	1	5	2	4	4	3	1	1	1	1	1	1	1	1	2	3	1	4	2	1	3	1	2	2	2	1	3	2	1	3
1021	0	11	1	Hangzhou	Shengli	5	5	5	4	5	5	3	5	5	5	5	5	5	5	5	5	5	4	5	3	2	4	2	1	1	1	1	3	3	1	5	3	1	3	2	5	5	5	5	5	2	4	2
1022	0	11	1	Hangzhou	Fenghuang	3	4	5	3	3	3	4	3	4	2	3	5	3	2	3	2	4	4	2	1	1	1	1	1	1	1	1	3	4	1	3	1	1	1	1	3	2	1	1	3	2	1	2
1023	1	11	1	Hangzhou	Fenghuang	5	5	5	4	3	3	3	3	2	3	4	2	2	3	2	2	5	4	3	1	1	1	1	1	1	1	1	1	2	1	3	3	1	2	1	1	1	1	1	1	1	1	1
1024	0	11	0	Kunming	Zhugou	3	1	1	4	4	5	1	5	5	3	5	5	3	5	4	3	5	4	1	2	1	2	3	1	2	1	1	3	2	1	4	2	1	3	1	4	3	5	1	5	3	5	4
1025	0	11	0	Xishuangbanna	Changle	4	4	4	4	5	5	4	3	4	3	4	3	5	2	3	3	3	4	3	3	2	2	2	1	1	1	1	2	1	2	4	2	2	2	1	2	3	1	1	3	3	1	3
1026	0	11	1	Xishuangbanna	Shiji	5	3	5	5	5	5	4	3	3	5	4	3	3	3	4	5	2	4	5	1	2	4	1	1	1	1	1	5	1	1	5	3	1	4	1	3	3.5	3	4	3	2	1	2
1027	1	11	1	Xishuangbanna	Shiji	4	5	5	4	4	4	4	4	4	4	3	4	3	2	3	2	2	4	3	2	2	4	1	1	1	1	1	2	1	1	4	2	1	3	1	3	2	2	2	3	4	2	2
1028	1	11	0	Hangzhou	Nanshan	2	2	4	2	5	5	2	4	4	2	4	3	3	4	3	2	2	4	4	2	1	1	2	2	1	1	1	2	3	1	4	3	1	3	1	1	1	3	1	4	4	2	3
1029	1	11	0	Hangzhou	Lijia	3	5	4	4	5	4	3	3	3	3	5	3	3	3	4	3	3	4	3	3	2	2	3	2	2	1	1	2	3	1	3	3	2	3	1	2	3	3	3	4	4	2	2
1030	1	11	1	Hangzhou	Cuiyuan	5	5	5	5	5	5	5	5	5	5	5	5	5	3	3	2	2	4	3	3	2	3	2	2	2	2	1	2	3	1	5	2	2	2	2	4	3	4	2	3	3	2	3
1031	0	11	0	Kunming	Erjie	5	5	5	4	4	5	5	4	5	5	4	5	5	4	5	2	3.5	4	4	3	2	2	3	2	1	1	1	2	2	1	4	5	5	4	2	2	1	1	1	2	2	5	2
1032	0	11	0	Kunming	Zhugou	5	5	5	5	5	5	2	5	4	5	1	4	3	3	5	5	5	4	5	3	2	4	1	2	1	1	1	3	4	3	5	1	2	3	1	2	3	2	1	2	3	4	3
1033	0	11	1	Kunming	Wuhua	4	5	5	5	4	4	4	3	4	5	5	3	5	3	4	3	3	4	4	2	4	4	4	2	1	1	1	4.5	4	1	3	4	1	3	1	4	4	4	4	3	2	2	3
1034	0	11	0	Xishuangbanna	Erxiao	4	1	5	3	4	3	3	4	5	5	4	3	3	2	4	2	5	4	4	4	3	2	3	2	2	2	1	3	3	1	3	5	1	3	3	3	3	2	1	2	3	4	4.5
1035	1	11	1	Xishuangbanna	Shiji	3	4	4	4	4	3	3	4	3	3	4	3	3	2	4	3	2	4	4	2	2	1	3	2	1	1	1	4	1	1	1	2	1	2	2	2	2	2	2	3	1	1	2
1036	1	11	1	Xishuangbanna	Shiji	5	5	5	5	5	4	5	5	5	5	5	5	5	3	4	3	3	4	5	5	3	4	3	2	2	2	1	2	2	1	2	2	3	2	3	3	3.5	3	3	2	2	5	5
1037	1	11	1	Xishuangbanna	Yixiao	3	5	5	3	5	3	4	3	3	3	2	3	3	5	5	5	5	4	4	4	3	3	3	2	2	2	1	3	2	1	1	2	1	2	1	2	4.75	3	2	3	3	3	3
1038	1	11	0	Hangzhou	Nanshan	5	5	5	5	5	4	4	5	4	5	4	5	5	4	5	3	4	4	4	5	5	5	4	3	1	4	1	5	3	1	1	1	3	4	1	5	4	5	1	3	2	3	5
1039	1	11	0	Hangzhou	Lijia	4	5	5	5	5	4	4	5	4	4	5	5	4	3	3	3	3	4	3	2	4	3	2	3	1	1	1	3	3	1	3	5	3	4	1	1	1	1	1	3	3	1	1
1040	1	11	1	Hangzhou	Fenghuang	4	5	4	4	4	4	5	2	4	5	5	3	5	3	2	2	4	4	4	3	3	4	4	3	1	5	1	4	4	1	3	4	1	4	1	3	3	3	3	4	3	4	5
1041	1	11	0	Kunming	Zhugou	3	4	4	3	5	4	3	4	4	4	3	2	5	4	3	3	4	4	4	3	2	4	3	3	3	2	1	3	2	1	3	4	2	3	1	2	2	2	2	3	4	3	3
1042	0	11	1	Kunming	Lianhua	4	5	5	5	3	4	3	5	4	5	4	2	2	4	3	2	5	4	4	2	1	1	2	3	2	2	1	1	4	2	4	2	1	1	1	4	5	5	5	4	3	5	2
1043	0	11	1	Kunming	Wuhua	4	5	5	4	4	4	5	5	4	4	5	4	4	3	4	4	3	4	4	3.75	3	3	3	3	3	3	1	3	4	1	3	3	1	3	1	4	4	4	4	4	4	3	3
1044	1	11	1	Kunming	Yunda	5	5	5	5	5	4	5	4	4	3	4	5	3	4	4	3	3	4	3	3	2	2	3	3	3	3	1	2	3	1	4	2	1	4	1	3	3	3	2	3	4	2	5
1045	0	11	0	Xishuangbanna	Erxiao	4	5	5	5	4	5	4	5	5	4	5	4	5	3	4	5	3	4	4	3	3	3	3	3	4	4	1	3	3	3	4	4	2	3	3	2	2	2	2	2	3	3	2
1046	1	11	0	Xishuangbanna	Zhongxin	4	4	5	5	5	5	5	5	4	4	4.5	4	5	3	4	3	3	4	3	4	2	4	4	3	3	3	1	3.5	1	1	2	4.75	1	4	1	4	4	3	2	3	4	3	4
1047	0	11	1	Xishuangbanna	Yixiao	4	5	5	3	5	5	5	5	3	2	1	2	2	5	5	5	4	4	4	1	1	1	1	3	4	3	1	1	3	1	4	1	1	1	2	3	3	2	2	4	3	3	2
1048	1	11	1	Xishuangbanna	Shiji	4	5	5	5	5	5	4	4	4	3	4	5	4	3	4	2	3	4	4	2	3	4	2	3	2	3	1	4	5	1	2	2	2	3	1	3	3	3	3	2	2	2	3
1049	1	11	0	Kunming	Erjie	5	5	5	4	5	4	4	5	4	4	5	4	5	3	4	3	4	4	3	3	3	4	3	4	3	1	1	3	2.75	2	5	4	2	3	2	2	4	2	2	3	3	3	2
1050	0	11	1	Kunming	Lianhua	5	5	5	5	5	5	5	4	4	5	5	5	5	5	5	5	5	4	5	4	4	5	5	4	5	5	1	5	5	1	1	3	1	3	1	3	3	3	3	3	3	5	5
1051	1	11	1	Kunming	Lianhua	4	5	5	4	5	4	5	4	4	4	3	4	5	4	4	3	5	4	4	4	4	4	4	4	4	3	1	4	1	1	1	1	1	4	1	2	4	4	3.25	2	4	4	3
1052	0	11	1	Xishuangbanna	Yixiao	4	4	4	4	4	4	4	4	4	4	4	4	4	4	4	4	4	4	4	4	4	4	4	4	4	4	1	3	1	1	2	2	1	2	2	2	2	2	2	2	2	2	2
1053	0	11	1	Xishuangbanna	Yixiao	4	3	4	5	5	5	5	5	4	4	4	3	4	3	4	4	5	4	5	4	3	5	4	4	4	4	1	5	2	1	3	4	1	4	2	5	5	5	4	5	4	4	5
1054	1	11	0	Kunming	Zhugou	4	5	5	4	5	5	3	5	3	4	3	5	4	3	5	5	5	4	5	5	3	5	5	5	4	5	1	5	5	1	2	4	1	5	1	5	2.75	2	5	5	5	4	3.25
1055	0	11	1	Kunming	Wuhua	5	5	5	5	5	5	5	5	5	4	5	3	5	3	4	4	5	4	5	3	5	4	5	5	4	5	1	5	5	4	3	5	1	3	3	4	5	5	5	4	5	4	3
1056	0	11	1	Kunming	Wuhua	5	5	5	5	5	5	5	5	5	5	5	4	4	4	5	5	4	4	5	3	2	2	5	5	3	3	1	5	4	1	3	3	1	4	1	5	5	5	5	5	5	4	5
1057	0	11	1	Kunming	Wuhua	5	5	5	5	5	5	5	5	5	5	5	5	5	4	4	5	4	4	5	4	4	5	5	5	4	4	1	4	5	1	1	5	1	5	1	3	5	4	4	4	4	4	4
1058	1	11	1	Kunming	Lianhua	4	5	5	5	5	5	4	4	4	5	5	5	5	4	5	3	5	4	4	2	1	4	5	5	1	1	1	4	5	2	4	4	3	4	4	4	5	5	4	5	4	1	5
1059	0	11	0	Xishuangbanna	Changle	5	4	4	3	5	3	3	5	4	5	5	4	4	5	4	2	5	4	5	3	2	5	4	5	4	5	1	5	2	2	1	3	5	4	2	4	5	4	5	4	5	4	5
1060	1	11	0	Xishuangbanna	Zhongxin	4	5	4	5	5	4	5	4	3	3	4	5	5	4	4	3	3	4	4	4	3	5	4	5	1	5	1	3	2	5	2	4	2	4	4	3	3	3	2	3	3	2	3
1061	1	11	1	Kunming	Yunda	5	5	5	5	5	5	5	5	5	5	5	3	5	3	5	3	4	4.5	4	3	2.25	3	3	2	1	1	1	3	3	3	5	2	1	3	1	3	3	3	3	3	3	3	3
1062	1	11	1	Hangzhou	Fenghuang	3	5	5	5	5	5	5	5	5	5	3	5	5	2	4	2	4	4.75	2	1	1	1	1	1	1	1	1	1	3	1	2	3	2	2	3	2	3	3	2	5	2	2	2
1063	0	11	0	Kunming	Zhugou	5	5	5	3	5	4	3	4	4	5	3	2	3	3	4	5	3	4.75	1	2	2	2	2	1	1	1	1	3	2	2	4	2	4	3	5	4	3	2	2	4	4	5	3
1064	0	11	0	Hangzhou	Nanshan	5	5	5	5	5	5	5	5	5	4	5	5	4	3	3	1	1	5	3	3	1	1	3	1	1	1	1	2	2	3	3	1	2	2	2	2	1	2	2	3	2	2	2
1065	0	11	0	Hangzhou	Nanshan	5	5	5	5	5	5	4	5	5	5	5	3	3	3	4	4	4	5	3	3	2	4	1	1	1	1	1	2	2	1	1	3	1	3	1	1	1	1	1	2	1	4	4.25
1066	0	11	0	Hangzhou	Nanshan	4	5	5	5	5	5	5	4	5	5	4	5	5	3	4	3	4	5	4	5	2	4	3	1	1	1	1	2	2	1	3	5	1	3	2	4	2	2	4	3	4	2	4
1067	0	11	1	Hangzhou	Shengli	5	4	5	3	4	4	5	3	4	3	4	2	5	2	4	2	5	5	3	1	1	1	1	1	1	1	1	2	3	1	4	2	1	2	1	2	1	3	2	1	1	1	1
1068	1	11	1	Hangzhou	Shengli	5	5	5	3	5	5	5	5	5	5	4	2	5	4	5	2	3	5	5	2	1	4	5	1	1	1	1	5	3	1	2	1	1	4	1	5	5	5	5	5	5	2	5
1069	1	11	1	Hangzhou	Shengli	5	5	5	5	4	4	3	3	3	3	4	4	5	3	4	4	5	5	5	1	1	1	2	1	1	1	1	1	3	1	1	3	2	1	1	3	3	3	3	2	2	1	3
1070	1	11	1	Hangzhou	Shengli	5	5	5	4	5	4	5	5	4	3	5	1	3	3	5	2	3	5	5	1	1	5	3	1	1	1	1	3	5	1	2	1	2	1	1	5	4	4	2	3	4	1	4
1071	1	11	1	Hangzhou	Fenghuang	5	5	5	5	5	5	1	3	3	3	4	3	4	3	5	5	4	5	4	1	1	1	5	1	3.25	1	1	3	2	1	1	1	1	1	1	2	1	1	1	5	1	4	2
1072	1	11	1	Hangzhou	Fenghuang	4	3	4	1	1	1	1	1	1	1	1	1	1	1	5	1	5	5	5	1	1	1	1	1	1	1	1	1	5	1	1	1	1	1	1	1	1	1	1	1	1	1	1
1073	0	11	0	Kunming	Erjie	5	5	5	5	5	5	3	4	4	3	4	2	5	4	3	4	4	5	2	2	2	3	5	1	2	2	1	3	3	2	1	5	3	4	1	4	3	2	2	5	5	4	3
1074	1	11	0	Kunming	Erjie	4	4	5	3	5	4	4	4	4	4	2	2	4	2	4	4	3	5	4	1	2	4	1	1	1	1	1	2	2	1	1	1	1	2	1	2	2	2	2	3	2	3	2
1075	1	11	0	Kunming	Zhugou	4	2	5	2	4	1	4	3	5	3	1	2.5	4.75	2	4	5	4.75	5	5	4	4	4	3.25	1	4.25	1	1	5	2	2	4	2	2.5	2	1.5	4	3	3.25	2	2	4	4	2
1076	0	11	1	Kunming	Lianhua	4	4	4	4	4	3	4	4	4	4	4	3	3	3	4	3	2	5	4	5	1	1	1	1	1	1	1	1	3	3.5	1	3	1	1	2	2	2	2	3	1	2	4	2
1077	0	11	1	Kunming	Wuhua	4	5	5	5	5	4	4	4	3	4	4	4	5	4	5	3	4	5	2	4	1	3	4	1	1	1	1	4	5	1	2	4	1	3	1	5	5	5	5	5	4	5	4
1078	0	11	1	Kunming	Wuhua	4	5	5	5	5	4	4	3	3	3	4	4	5	3	4	5	5	5	5	4	2	5	1	1	3	3	1	2	3	2	5	1	3	2	2	3	2	2	3	5	5	4	3
1079	1	11	1	Kunming	Lianhua	3	2	3	5	5	5	3	4	5	5	5	5	5	3	5	5	4	5	5	5	5	5	2	1	1	1	1	3	3	3	2	3	1	5	4	2	5	5	5	2	5	1	5
1080	1	11	1	Kunming	Wuhua	5	5	5	3	5	5	4	3	2	5	4	5	5	5	3	5	4	5	5	3	1	1	1	1	2	3	1	4	4	1	5	3	2	2	1	5	4	3	3.5	2	3	1	5
1081	0	11	0	Xishuangbanna	Changle	5	4	5	1	5	5	5	4	4	1	1	1	5	4	4	1	5	5	3.25	2	1	4	2.75	1	2	5	1	5	1	1	1	1	1	3	3	1	2	3	3	2	3	3	3
1082	1	11	1	Xishuangbanna	Shiji	5	5	5	5	5	5	5	5	5	5	5	5	4	4	5	3	5	5	5	3	2	3	5	1	1	1	1	5	5	1	2	5	1	5	2	5	5	5	5	5	5	3	2
1083	1	11	1	Xishuangbanna	Yixiao	5	5	5	5	5	5	5	5	4	5	5	3	5	4	5	2	3	5	5	3	1	3	3	1	1	1	1	2	3	1	3	4	1	4	1	1	2	2	1	5	4	4	1
1084	0	11	0	Hangzhou	Lijia	5	4	4	4	5	4	5	3	4	4	3	3	4	4	5	4	4	5	4	3	1	2	3	2	4	5	1	3	2	1	3	4	4	4	2	5	2	2	2	4	2	4	5
1085	1	11	0	Hangzhou	Nanshan	5	5	5	4	5	1	5	5	5	5	3	4	5	2	5	5	5	5	3	1	1	1	2	2	1	1	1	2	2	1	3	2	1	3	1	2	2	3	4	5	2	1	2
1086	0	11	1	Hangzhou	Shengli	5	5	5	5	5	5	5	5	5	5	5	5	5	5	5	5	5	5	5	5	5	5	2	2	1	1	1	5	3	5	3	5	5	5	5	5	5	5	5	5	5	5	5
1087	0	11	1	Hangzhou	Cuiyuan	5	5	5	4	5	4	5	5	3	5	5	5	5	5	3	5	4	5	3	3	2	2	5	2	3	4	1	5	5	2	2	5	5	5	5	5	5	5	5	3	4	5	2
1088	1	11	1	Hangzhou	Shengli	4	5	5	5	5	4	4	4	2	2	3	3	2	3	4	1	5	5	4	1	1	3	2	2	1	1	1	3	3	1	5	5	1	2	1	3	2	2	2	5	3	2	2
1089	1	11	1	Hangzhou	Shengli	5	5	5	4	4	4	3	4	3	4	3	3	5	3	3	3	2	5	3	5	3	3	2	2	2	2	1	3	4	1	3	3	1	3	1	2	2	3	2	2	2	2	1
1090	1	11	1	Hangzhou	Shengli	5	4	5	4	5	4	4	4	5	4	5	5	5	2	4	2	5	5	3	2	2	2	5	2	1	1	1	5	5	1	2	5	2	3	1	5	5	5	5	3	5	5	4
1091	1	11	1	Hangzhou	Fenghuang	4	3	5	4	3	4	5	4	4	4	3	2	3	4	3	3	3	5	2	5	2	5	5	2	1	1	1	5	5	1	3	3	2	4	2	3	3	3	3	4	4	3	4
1092	0	11	0	Kunming	Erjie	5	5	5	5	5	5	5	5	5	4	5	5	5	5	5	3	5	5	4	3	3	4	4	2	2	2	1	4	2	1	3	5	3	3	1	3	3	3	3	4	3	5	4
1093	0	11	0	Kunming	Erjie	4	2	4	4	5	5	4	5	4	5	5	5	4	2	3	4	5	5	3	3	2	3	3	2	4	3	1	2	1	1	5	2	1	1	2	3	3	2	2	2	2	2	2
1094	0	11	0	Kunming	Zhugou	5	4	5	4	5	4	4	5	5	4	5	4	4	3	5	5	5	5	4	3	3	2	4	2	1	1	1	5	5	4	5	5	3	4	1	4	4	3	3	4	4	4	3
1095	0	11	0	Kunming	Zhugou	4	2	4	4	4	4	3	5	5	4	4	4	4	3	5	4	4	5	4	4	3	4	3	2	2	3	1	4	1	1	3	2	1	3	1	2	2	2	2	5	5	5	4
1096	0	11	1	Kunming	Wuhua	5	5	5	5	5	4.5	5	4	5	4	5	5	5	5	5	5	4	5	5	3	1	5	2	2	3	4	1	4	4	1	3	4	2	4	1	5	5	5	5	5	3	5	5
1097	1	11	1	Kunming	Wuhua	1	5	5	3	5	3	3	4	5	5	1	5	5	2	3	5	1	5	2	5	1	1	1	2	2	2	1	4	1	1	4	3	1	1	1	2	2	2	2	2	2	5	5
1098	0	11	0	Xishuangbanna	Zhongxin	5	5	5	5	5	5	5	5	5	5	5	5	5	3	5	3	5	5	5	5	5	5	4	2	3	5	1	5	1	1	2	5	5	5	5	4	5	3	3	5	5	5	5
1099	0	11	0	Xishuangbanna	Zhongxin	4	5	5	4	5	5	5	3	4	5	5	3	5	3	4	4	2	5	3	1	1	1	1	2	2	2	1	3	1	1	2	4.5	2	2	3	1	5	4	1	2	1	1	1
1100	0	11	1	Xishuangbanna	Shiji	4	5	5	4	5	5	5	5	5	4	5	3	5	4	4	2	3	5	2	2	1	3	4	2	1	1	1	5	5	1	4	5	1	5	1	5	5	5	5	5	5	1	5
1101	0	11	1	Xishuangbanna	Shiji	4	5	5	5	5	5	3	3	3	2	4	2	4	3	4	5	4	5	2	2	1	1	1	2	1	1	1	3	1	1	5	4	1	3	1	2	2	2	2	5	5	1	4
1102	0	11	0	Hangzhou	Nanshan	5	5	5	4	5	5	5	5	5	5	4	5	4	4	5	3	4	5	5	2	2	4	5	3	1	3	1	5	3	1	3	2	1	5	1	3	3	2	2	4	5	4	5
1103	0	11	0	Hangzhou	Nanshan	4	4	4	5	5	5	4	4	4	5	5	4	5	3	5	3	3	5	4	5	3	3	5	3	1	1	1	5	5	2	2	5	1	2	5	2	2	2	4	5	5	5	5
1104	0	11	0	Hangzhou	Nanshan	5	5	5	5	5	5	5	5	5	5	5	4	5	5	5	5	5	5	5	3	3	5	4	3	2	2	1	5	5	2	3	4	2	3	3	5	5	5	5	5	5	5	4
1105	0	11	0	Hangzhou	Nanshan	5	5	5	5	5	5	5	5	5	5	4	5	5	3	4	4	4	5	4	3	2	2	4	3	3	3	1	4	3	1	3	2	1	3	1	4	4	3	3	3	3	2	2
1106	1	11	0	Hangzhou	Nanshan	5	4	5	4	5	5	5	4	4	5	5	4	5	4	5	3	5	5	4	5	3	4	5	3	1	5	1	5	4	2	2	4	2	3	1	3	3	3	2	4	3.25	3	3
1107	1	11	0	Hangzhou	Lijia	3	5	5	5	5	5	5	5	5	3	3	3	5	3	4	4	4	5	4	3	2	5	5	3	4	5	1	5	5	1	4	3	5	5	5	1	1	1	5	5	5	3	2
1108	0	11	1	Hangzhou	Fenghuang	4	5	5	5	5	5	3	4	5	5	5	5	5	3	3	5	3	5	5	5	2	5	5	3	1	1	1	5	2	1	3	2	1	1	1	2	3	3	2	4	4	5	5
1109	0	11	1	Hangzhou	Fenghuang	5	5	5	4	5	4	5	4	3	4	4	5	5	4	5	3	5	5	4	5	5	5	5	3	1	1	1	5	5	1	5	2	1	3	1	5	5	5	5	3	5	2	5
1110	1	11	1	Hangzhou	Cuiyuan	5	5	5	3	5	4	5	4	3	4	4.75	3	5	5	4.25	3	4	5	4	3	2	2	5	3	4	3	1	5	5	1	3	2	2	4	1	3	3	4	2	2	5	4	3
1111	1	11	1	Hangzhou	Fenghuang	5	5	5	5	5	3	5	3	5	3	5	5	5	5	3	2	3	5	1	3	1	1	1	3	1	1	1	2	5	1	1	5	1	5	1	5	5	5	5	5	5	1	1
1112	0	11	0	Kunming	Erjie	5	4	4	4	5	4	5	5	5	4	5	5	5	3	4	4	4	5	1	3	4	4	2	3	2	3	1	3	4	1	3	4	4	3	1	1	1	3	1	5	5	5	3
1113	0	11	0	Kunming	Erjie	5	3	5	5	5	5	4	4	5	5	5	4	5	4	3	2	5	5	5	5	4	3	2	3	2	2	1	3	4	1	4	3	2	3	1	3	2	2	2	2	3	3	2
1114	0	11	0	Kunming	Zhugou	4	5	5	4	5	4	4	4	4	5	4	4	5	4	5	3	5	5	5	4	3	4	4	3	4	5	1	4	5	2	1	4	3	3	2	3	3	2	3	4	4	5	3
1115	1	11	0	Kunming	Zhugou	5	5	5	5	4	5	5	4	4	5	4	5	4	3	5	4	5	5	4	4	2	4	3	3	4	3	1	3	2	2	4	4	3	4	1	5	4	2.25	4	5	3	4	3
1116	0	11	1	Kunming	Lianhua	5	5	5	5	5	5	5	5	5	4	5	4	5	5	5	5	5	5	5	5	3	5	5	3	2	1	1	2	4	2	3	4	2	2	1	4	4	4	4	3	4	3	3
1117	0	11	1	Kunming	Lianhua	5	5	5	5	5	4	5	4	5	5	5	5	4	4	4	5	5	5	5	5	4	4	3	3	3	4	1	4	4	2	2	5	2	4	3	5	5	5	5	4	5	3	2
1118	0	11	1	Kunming	Wuhua	4	2	5	4	5	4	3	4	3	5	4	3	5	4	5	5	4	5	5	4	3	2	4	3	2	4	1	4	5	3	2	5	2	3	1	5	4	4	3.5	4	3	3	5
1119	0	11	1	Kunming	Yunda	5	5	5	5	5	5	5	5	5	5	5	2	5	5	4	5	5	5	5	5	3	5	5	3	3	3	1	3	5	2	2	5	5	5	3	5	5	5	5	5	5	4	5
1120	1	11	1	Kunming	Lianhua	4	4	5	4	5	4	3	3	4	4	4	4	5	4	4	3	4	5	3	4	3	3	4	3	4	4	1	4	3	2	2	2.75	1	3	1	3	3	4	3	2	3	2	2
1121	1	11	1	Kunming	Lianhua	5	5	5	4	4	5	3	5	5	3	3	4	4	3	4	3	3	5	3.25	3	2	2	4	3	4	2	1	4	1	1	2	3	1	2	1	3	3	3	3	3	3	2	2
1122	1	11	1	Kunming	Wuhua	5	5	5	5	5	5	5	5	5	5	5	4	5	3	4	2	5	5	4	4	3.5	5	4	3	1	1	1	4	5	2	1	3	2	3	2	5	5	5	5	3	5	4	4.25
1123	1	11	1	Kunming	Wuhua	5	3	4	4	5	5	5	3	3	5	5	3	3	5	5	4	5	5	5	5	1	5	4.25	3	1	1	1	5	5	1	2	5	1	5	1	5	5	5	5	5	5	5	5
1124	1	11	1	Kunming	Wuhua	5	5	5	4	5	5	5	5	5	5	5	4	5	3	5	2	5	5	4.5	5	3	5	2	3	3	3	1	3	4	2	3	2	1	2	1	5	5	5	4	4	3	3	5
1125	1	11	1	Kunming	Wuhua	5	5	5	5	5	5	5	5	5	5	5	4	3	3	3.75	2	5	5	3.75	3	2	5	5	3	2	1	1	4	1	4	3	1	3	3	1	2	2	2	2	3	3	3	3
1126	0	11	0	Xishuangbanna	Changle	2	5	5	4	5	4	5	4	3	5	5	2	4	4	5	4	3	5	1	3	4	3	3	3	3	4	1	3	3	4	2	2	1	1	1	2	2	1	1	2	3.75	4	5
1127	0	11	0	Xishuangbanna	Changle	5	5	5	5	5	5	3	4	5	4	4	4	5	5	5	5	5	5	5	5	5	5	3	3	3	3	1	5	2	1	3	5	1	5	1	5	5	5	1	5	5	5	5
1128	0	11	0	Xishuangbanna	Zhongxin	5	4	5	4	5	5	5	4	4	5	3	1	3	1	5	3	5	5	5	1	2	2	5	3	5	4	1	5	2	1	3	2	2	5	1	3	3	3	3	5	4	5	3
1129	0	11	0	Xishuangbanna	Erxiao	5	5	5	4	5	5	5	4	4	5	5	3	5	4	5	5	5	5	5	5	3	3	4	3	2	3	1	4	2	1	2	5	1	5	3	2	3	2	2	5	5	5	5
1130	1	11	0	Xishuangbanna	Changle	4	4	5	4	5	4	4	4	5	3	3	5	5	3	4	4	3	5	4	3	2	3	2	3	3	2	1	3	2	2	2	3	1	2	1	3	4	4	3	2	3	3	2
1131	1	11	0	Xishuangbanna	Changle	5	4	5	5	5	5	5	4	4	5	4	2	4	4	5	4	5	5	5	4	4	4	3	3	4	5	1	5	3	1	2	3	2	4	5	4	4	4	3	2	5	4	5
1132	0	11	1	Xishuangbanna	Shiji	5	4	5	5	5	5	2	4	4	4	3	3	4	4	5	4	4	5	5	4	3	4	3.5	3	4	4	1	4	1	2	2	5	2	2	2	3	4	2	1	4	4	5	3
1133	0	11	1	Xishuangbanna	Yixiao	5	5	5	5	5	5	5	5	5	5	5	4	5	4	4	4	4	5	4	3	4	4	3	3	4	4	1	3	3	2	3	5	1	3	3	5	5	5	5	4	3	5	5
1134	0	11	1	Xishuangbanna	Yixiao	3	4	5	5	5	5	5	5	5	5	2	5	5	5	5	5	5	5	5	5	5	5	5	3	2	5	1	5	5	5	3	5	4	5	2	5	5	5	5	5	5	5	5
1135	1	11	1	Xishuangbanna	Shiji	5	5	5	5	5	5	5	4	5	5	5	5	5	4	5	3	4	5	5	5	5	5	5	3	3	3	1	5	5	1	3	5	5	5	5	5	5	1	5	5	5	5	5
1136	1	11	1	Xishuangbanna	Shiji	5	5	4	4	1	5	5	3	3	4	1	5	4	1	5	4	5	5	5	4	5	4	1.75	3	3	5	1	4	5	3	3	1	1	5	3	2	5	5	3	5	4	5	4
1137	1	11	1	Xishuangbanna	Shiji	5	5	5	5	5	5	5	5	5	5	5	5	5	4	5	4	5	5	4	5	2	4	5	3	1	1	1	4	3	1	1	5	1	1	1	4	4	4	4	5	2	5	2
1138	1	11	1	Xishuangbanna	Shiji	4	4	4	4	3	5	4	4	4	4	3	4	5	3	5	2	5	5	5	3	2	3	4	3	5	5	1	5	3	1	1	2	2	3	1	5	5	5	5	3	4	3	2
1139	0	11	0	Hangzhou	Lijia	5	5	5	4	5	5	3	5	5	3	5	2	4	5	5	5	5	5	5	3	3	5	3	4	1	1	1	4	2	1	2	5	1	5	1	1	1	3	2	5	5	2	5
1140	0	11	1	Hangzhou	Cuiyuan	5	5	5	5	5	5	5	5	5	5	5	4	5	3	5	5	5	5	5	4	3	4	3.75	4	5	2	1	3	3	1	3	5	1	3	2	5	5	5	5	5	5	3	3
1141	0	11	1	Hangzhou	Cuiyuan	5	5	5	5	4	5	5	5	5	5	5	4	5	3	5	5	5	5	5	3	2	4	5	4	5	2	1	3	5	1	1	5	1	1	1	3	3	2	1	5	5	5	5
1142	0	11	1	Kunming	Lianhua	5	5	5	3	5	3	3	4	5	3	3	4	5	3	3	3	5	5	4	4	3	3	3	4	2	2	1	2	2	2	2	3	2	2	1	4	3	3	3	2	3	4	4
1143	0	11	1	Kunming	Wuhua	5	5	5	5	5	5	3	5	5	5	4	4	5	4	5	5	5	5	5	4	3	3	3	4	4	3	1	5	2	1	3	1	1	2	1	2	2	4	4	4	4	4	4
1144	0	11	1	Kunming	Wuhua	5	5	5	5	5	5	5	4	5	5	5	5	5	4	5	5	5	5	5	4	2	3	4.25	4	2	2	1	4	5	1	4	5	5	4	1	4	4	4	4	4	5	5	4
1145	0	11	1	Kunming	Yunda	5	5	5	5	5	5	5	5	5	5	5	4	4	5	4	5	4	5	4	4	1	4	5	4	2	1	1	5	5	1	3	5	4	5	5	5	5	5	5	5	5	5	5
1146	0	11	1	Kunming	Yunda	5	5	5	5	5	5	5	5	5	5	5	5	5	4	3	4	4	5	5	5	5	4	4	4	3	5	1	5	4	3	4	4	2	4	2	5	5	5	5	4	4	3	5
1147	0	11	1	Kunming	Yunda	5	5	5	5	5	5	5	5	5	5	5	5	5	5	5	5	5	5	4	5	5	4	3	4	2	3	1	5	5	5	3	5	2	5	1	5	5	5	5	5	5	5	5
1148	1	11	1	Kunming	Lianhua	5	5	5	5	5	4	4	4	3	5	5	5	5	3	4	2	5	5	3	5	5	5	5	4	4	5	1	3	4	3	1	5	4	5	1	4	4	3	4	4	5	5	4
1149	1	11	1	Kunming	Wuhua	5	4	5	3	4	5	4	5	4	3	4	5	5	1	3	3	4	5	2	1	1	2	3	4	1	2	1	5	2	1	2	4.25	1	2	1	5	2	1	2	1	1	2	2
1150	1	11	1	Kunming	Wuhua	4	5	5	5	5	5	4	3	4	5	3	4	5	4	3	2	5	5	4	3	3	4	5	4	3	2	1	4	3	1	2	1	2	4	1	5	5	5	5	3	3	2	4
1151	1	11	1	Kunming	Wuhua	5	5	5	5	5	5	4	5	5	5	4	4	5	4	4	4	4	5	5	3	3	5	4	4	3	3	1	5	5	1	2	3	3	3	1	4	4	4	4	3	3	4	3
1152	1	11	1	Kunming	Wuhua	5	5	5	5	5	5	5	5	5	5	5	5	5	3	4	5	3	5	5	4	4	5	3	4	3	1	1	2	3	2	4	2	2	2	1	2	2	2	2	3	3	2	3
1153	0	11	0	Xishuangbanna	Zhongxin	4	5	4	4	5	5	5	4	5	4	5	4	4	3	5	4	5	5	5	5	3	3	5	4	2	4	1	5	4	1	2	5	2	2	3	5	3	4	5	3	4	5	2
1154	0	11	0	Xishuangbanna	Erxiao	5	5	5	5	5	5	5	5	5	5	5	5	5	4	5	4	5	5	4	5	4	5	5	4	2	5	1	5	3.75	1	3	5	1	5	1	4	5	4	3	5	3	5	3
1155	0	11	1	Xishuangbanna	Shiji	4	4	5	4	5	4	4	5	5	4	4	4	4	4	5	4	5	5	5	4	4	5	4	4	4	3	1	5	1	1	2	5	2	4	3	3	3.5	4	4	3	4	3	5
1156	1	11	1	Xishuangbanna	Shiji	5	5	5	5	5	5	4	5	5	5	5	4	5	5	5	3	5	5	5	5	2	2	5	4	1	1	1	5	3	1	3.75	5	1	5	1	5	5	4	5	5	4	5	3
1157	1	11	1	Xishuangbanna	Shiji	5	5	5	5	5	5	4.25	4	4	3	3	3.75	5	3	4	5	4	5	1	3	2	4	5	4	3	4	1	3	2	1	4	5	1	4	1	5	4.5	3	3.5	5	5	3	4
1158	1	11	1	Xishuangbanna	Shiji	5	4	5	5	5	5	5	5	4	4	5	4	4	4	5	5	4	5	5	4	4	5	3	4	4	5	1	5	4	1	2	5	1	4	1	5	5	5	5	4	4	4	3
1159	1	11	1	Xishuangbanna	Shiji	4	4	5	4	5	4	4	5	5	4	4	4	4	4	5	4	5	5	5	4	4	5	4	4	4	4	1	5	1	1	4	5	2	4	1	5	5	5	5	4	5	4	5
1160	1	11	1	Xishuangbanna	Shiji	5	5	5	5	5	5	4.75	5	5	5	5	1	5	5	5	5	5	5	5	5	4	5	5	4	5	5	1	5	4	1	5	5	1	5	1	3	3	2	2	3	3	5	5
1161	1	11	1	Xishuangbanna	Yixiao	5	5	5	5	5	5	5	5	5	5	5	5	5	4	5	5	5	5	5	5	4	3	4	4	5	5	1	5	1	3	2	4	2	3	2	3	3	3	3	4	4	4	4
1162	1	11	1	Xishuangbanna	Yixiao	5	5	5	5	5	5	5	5	5	4	5	4	5	5	5	5	5	5	5	5	5	3	5	4	3	5	1	5	5	1	4	5	1	5	1	5	5	5	5	5	5	3	5
1163	0	11	0	Hangzhou	Nanshan	5	5	5	5	5	5	5	5	5	3	5	5	5	3	3	4	5	5	5	2	3	3	5	5	1	1	1	3	2	1	3	5	3	3	4	3	3	3	3	5	5	5	5
1164	0	11	0	Hangzhou	Nanshan	5	5	5	5	5	5	5	5	5	5	5	5	5	5	5	4	5	5	5	5	3	3	5	5	3	3	1	5	5	1	2	5	1	5	1	5	5	5	5	5	5	5	5
1165	1	11	0	Hangzhou	Nanshan	5	5	5	4	5	5	5	5	5	5	5	3	5	5	5	5	5	5	5	4	3	5	4	5	1	4	1	4	4	2	1	4	2	5	1	2	2	2	2	4	3	5	5
1166	1	11	0	Hangzhou	Lijia	5	5	5	5	5	5	5	5	5	5	5	1	5	3	5	2	5	5	4	2	3	5	3	5	1	1	1	5	1	1	5	5	1	5	2	2	1	1	1	5	5	1	5
1167	1	11	0	Hangzhou	Lijia	5	5	5	5	5	5	5	5	5	5	5	5	5	5	5	3	5	5	5	5	5	5	5	5	5	5	1	5	5	1	1	5	1	5	2	5	5	5	5	5	5	5	5
1168	1	11	0	Hangzhou	Lijia	5	5	5	5	5	5	5	5	5	5	1	5	5	5	5	5	5	5	5	5	5	5	5	5	5	5	1	5	5	2	3	1	1	5	1	5	5	5	5	5	5	5	5
1169	0	11	1	Hangzhou	Cuiyuan	5	5	5	5	5	5	5	5	5	5	3	5	5	5	5	3	5	5	5	5	2	4	5	5	2	5	1	5	5	2	3	2	2	5	3	2	5	3	1	5	5	5	5
1170	1	11	1	Hangzhou	Shengli	4	3	4	1	5	5	3	2	1	2	1	1	1	2	5	4	3	5	4	3	2	4	2	5	2	3	1	3	3	2	3	1	1	2	1	4	4	3	3	2	2	3	4
1171	1	11	1	Hangzhou	Cuiyuan	4	5	4	5	4	5	3	5	4	4	3	4	5	4	3	3	5	5	5	5	4	5	3	5	5	5	1	4	5	1	4	4	2	5	1	5	5	5	5	4	4	4	3
1172	1	11	1	Hangzhou	Cuiyuan	5	5	5	5	5	5	5	5	4	2	5	5	5	5	5	3	3	5	5	4	4	2	5	5	1	1	1	5	3	2	1	5	2	3	1	5	5	5	5	3	4	4	2
1173	1	11	1	Hangzhou	Cuiyuan	5	5	5	5	5	2	5	5	5	5	5	3	5	5	5	5	5	5	1	5	5	5	5	5	5	5	1	5	5	5	2	2	1	3	2	5	5	5	5	5	5	5	5
1174	1	11	1	Hangzhou	Fenghuang	5	5	5	4	5	5	5	5	5	3	5	4	4	3	4	5	3	5	5	2	2	2	3	5	4	5	1	3	5	1	2	5	5	5	1	5	5	5	5	3	4	5	5
1175	1	11	1	Hangzhou	Fenghuang	5	5	5	5	5	5	5	5	5	5	5	5	5	5	5	5	5	5	5	5	5	5	5	5	1	5	1	5	5	5	5	5	1	4	1	5	5	5	5	4	3	5	3
1176	0	11	0	Kunming	Zhugou	5	5	5	5	5	5	5	5	5	5	5	5	5	4	4	5	5	5	5	5	5	5	5	5	5	5	1	4	3	1	4	4	1	4	2	3	4	3	2	4	2	3	2
1177	0	11	0	Kunming	Zhugou	4	5	5	3	5	5	4	5	5	3	5	4	5	3	4	5	4	5	5	3	2	2	4	5	4	3	1	4	4	1	3	4	1	3	1	2	2	2	2	3	4	5	3
1178	0	11	0	Kunming	Zhugou	5	5	5	5	5	5	5	5	5	5	4	5	5	3	5	3	3	5	5	1	1	5	1	5	2	1	1	5	3	1	3	5	1	4	3	1	1	1	1	2	3	5	5
1179	0	11	0	Kunming	Zhugou	5	5	5	5	5	5	5	5	5	5	3	4	5	5	5	5	5	5	5	4	5	5	3	5	5	5	1	5	5	1	3	5	1	2	2	2	4	5	3	5	5	5	5
1180	1	11	0	Kunming	Erjie	5	5	5	5	5	5	5	5	5	5	5	5	5	5	3	5	5	5	5	4	5	4	5	5	4	5	1	5	5	1	2	4	1	5	2	5	5	5	5	5	5	5	5
1181	1	11	0	Kunming	Zhugou	5	2	4	4	5	5	3	3	4	5	2	3	4	4	4	5	4	5	4	5	4	5	4	5	3	4	1	5	3	1	4	3	1	5	1	3	3	3	3	4	5	3	4
1182	0	11	1	Kunming	Lianhua	5	5	5	5	5	5	5	5	5	5	5	5	5	5	5	5	5	5	5	5	5	5	5	5	2	2	1	3	4	4.25	4	5	5	5	2	5	5	4	4	5	3	4	2
1183	0	11	1	Kunming	Lianhua	5	5	5	5	5	5	5	5	5	5	5	5	5	4	5	3	5	5	5	5	3	3	5	5	4	4	1	5	5	1	3	4	1	3	1	3	5	5	5	4	4	4	4
1184	0	11	1	Kunming	Lianhua	5	4	5	5	5	5	5	5	5	5	4	5	5	3	5	4	5	5	5	5	5	5	5	5	3	2	1	3	4	1	3	5	2	2.5	1	5	5	5	5	3	5	5	5
1185	0	11	1	Kunming	Wuhua	5	5	5	5	5	5	5	5	5	5	5	5	5	5	5	5	5	5	5	5	5	5	5	5	2	3	1	3.75	4	1	3	3	2	3	1	5	3	4	5	4	5	5	5
1186	0	11	1	Kunming	Yunda	5	5	5	5	5	5	5	5	5	5	5	3	5	5	5	5	5	5	4	3	5	5	5	5	4	3	1	5	5	1	3	5	1	5	5	5	5	5	5	5	5	5	5
1187	0	11	1	Kunming	Yunda	5	5	5	5	5	5	5	5	5	5	5	4	5	5	5	5	5	5	5	3	4	3	5	5	3	5	1	5	5	1	2	2	1	4	1	5	5	5	5	5	5	5	5
1188	0	11	1	Kunming	Yunda	5	5	5	5	5	4	5	5	5	5	5	5	5	5	5	5	5	5	4	5	5	5	5	5	4	5	1	5	5	1	4	5	1	5	1	5	5	5	5	5	5	5	5
1189	0	11	1	Kunming	Yunda	4	5	5	5	5	5	3	3	3	3	3	4	5	5	5	5	5	5	5	5	5	5	5	5	5	5	1	4	2	2	3	2	1	4	1	5	5	5	5	5	3	2	2
1190	1	11	1	Kunming	Lianhua	5	5	5	5	5	5	5	5	5	5	5	4	5	3	5	5	5	5	5	5	5	5	5	5	5	4	1	5	4	1	4	5	1	5	1	5	5	5	5	5	5	5	5
1191	1	11	1	Kunming	Wuhua	5	5	5	5	5	5	5	5	5	5	5	5	5	4	5	5	5	5	5	4	4	5	5	5	1	1	1	5	3	1	2	5	1	3	1	3	3	3	3	5	5	5	5
1192	1	11	1	Kunming	Wuhua	5	5	5	5	5	5	5	5	5	5	5	5	5	4	5	5	5	5	5	1	1	4	5	5	1	1	1	5	5	1	4	5	1	5	1	5	5	5	5	5	5	5	5
1193	1	11	1	Kunming	Yunda	5	5	5	4	5	5	5	4	3	5	5	4	5	4	5	4	5	5	5	3	2	2.5	5	5	4	5	1	4	4	2	4	3	3	4	1	4	5	5	5	5	5	4	5
1194	1	11	1	Kunming	Yunda	5	5	5	5	5	5	5	5	5	5	5	5	5	5	5	5	5	5	5	4	5	5	5	5	5	4	1	5	5	1	2	4	1	5	1	5	5	5	5	4	5	5	5
1195	1	11	1	Kunming	Yunda	5	5	5	5	5	5	5	5	5	5	5	5	5	5	5	5	5	5	5	5	5	3	5	5	2	2	1	5	5	1	4	5	3	4	1	5	4	4	3	5	5	4	4
1196	1	11	1	Kunming	Yunda	5	5	5	4	5	4	4	5	5	5	1	5	3	3	4	5	5	5	5	1	1	5	5	5	5	5	1	1	4	4	4	1	1	3	1	5	5	5	5	2	3	2.5	5
1197	0	11	0	Xishuangbanna	Changle	5	5	5	5	5	5	3	5	4	5	5	4	5	4	5	3	5	5	5	2	4	5	3	5	5	5	1	5	3	1	1	3	1	5	1	5	5	5	5	5	5	5	4
1198	1	11	0	Xishuangbanna	Erxiao	5	5	5	4	5	5	4	5	4	3	5	4	4	4	5	5	5	5	5	4	3	5	5	5	4	5	1	5	3	4	1	5	1	5	5	4	4	4	1.5	2	5	5	5
1199	1	11	0	Xishuangbanna	Erxiao	5	5	5	5	5	5	5	5	5	5	1	5	5	5	5	5	5	5	4	5	5	5	5	5	5	5	1	5	5	1	1	1	5	5	1	4	4	4	4	5	4	5	5
1200	0	11	1	Xishuangbanna	Yixiao	5	5	5	5	5	5	5	5	5	5	5	5	5	5	5	5	5	5	5	5	3	5	5	5	5	5	1	5	5	1	3	5	1	5	1	5	5	5	5	5	5	5	5
1201	0	11	1	Xishuangbanna	Yixiao	3	4	4	3	3	5	5	5	5	5	5	2	2	5	5	5	5	5	5	5	1	5	5	5	5	5	1	5	2	1	4	5	1	4.75	1	5	5	5	5	5	5	5	5
1202	1	11	1	Xishuangbanna	Shiji	5	5	5	5	5	5	5	5	5	5	5	5	5	4	4	3	5	5	5	5	1	5	5	5	5	1	1	5	5	1	3	5	1	5	1	5	5	5	5	5	5	5	5
1203	1	11	1	Hangzhou	Cuiyuan	5	5	5	5	5	5	5	5	5	5	4	5	5	3	5	4	3	5	5	5	3	5	3.75	3	5	3	1	5	5	1	1	4	1	3	1	3	3	3	3	5	4	4	3
1204	0	11	0	Xishuangbanna	Zhongxin	4	4	4	4	4	4	5	4	4	4	4	4	5	4	4	4	5	4	4	4	3	4	4	4	4	4	1.5	2	5	1	3	4	1	4	2	4	4	5	4	4	4	4	4
1205	0	11	0	Xishuangbanna	Changle	4	2	5	3	5	4	3.25	3	4	5	3.75	2	5	4	4	3	4	3	4	4	3	4	2.75	3	3	4	1.75	2	3	1	3	4	3	4	1	1	3	2.75	2	3	2	3	4
1206	1	11	1	Xishuangbanna	Shiji	5	5	5	4	5	4	4	3	3	2	5	4	5	4	5	4	5	4	4	5	4	5	4	5	5	4	1.75	2	2	1	2	3.25	3	3	4	4	4	4	5	4	5	4	5
1207	1	11	0	Xishuangbanna	Changle	5	5	5	5	4	4	5	4	4	3	3	5	4	3	3	2	2	2	2	1	1	2	1	1	1	1	2	1	2	3	2	2	4	2	3	1	2	2	1	4	2	2	3
1208	1	11	0	Xishuangbanna	Changle	4	4	3	2	1	3	3	5	2	3	5	2	4	4	3	2	3	2	4	1	1	1	2	1	2	1	2	4	5	3	4	3	1	1	2	1	2	1	2	3	1	3	1
1209	1	11	0	Xishuangbanna	Erxiao	5	5	4	4	4	5	4	5	4	3	4	5	4	4	2	1	3	2	2	3.5	2	4	3	1	1	2	2	3	1	3	2	5	2	3	1	1	1	1	1	3	2	1	1
1210	0	11	1	Hangzhou	Shengli	3	5	5	3	5	5	3	4	4	5	4	3	5	4	3	3	2	2	4	2	2	3	4	2	1	2	2	4	4.5	3	3	3	3	2	2	3	3	3	3	3	3	3	2
1211	0	11	1	Kunming	Lianhua	2	3	3	2	3	1	3	4	3	3	2	1	1	2	2	2	2	2	2	2	2	2	2	2	2	2	2	2	2	2	2	2	2	2	2	4	2	2	4	2	4	2	2
1212	0	11	0	Hangzhou	Lijia	1	1	5	5	5	5	5	4	4	5	3	3	5	2	5	3	4	2	3	4	1	2	2	3	3	1	2	3	2	1	5	2	1	2	1	2	5	1	1	5	3	3	4
1213	0	11	1	Kunming	Yunda	4	5	5	5	4	4	4	3	4	4	5	3	4	4	4	3	2	2	4	2	1	3	4	3	2	1	2	3	4	1	2	4	1	2	2	2	2	2	1	2	5	3	3
1214	1	11	0	Xishuangbanna	Erxiao	5	4	5	5	5	4	4	4	3	3	2	4	5	3	5	5	4	2	4	3.25	2	3	5	5	2	1	2	1	2.25	2	3	1	1	1	2	2	3	4	1.5	2	4	1	2
1215	1	11	0	Xishuangbanna	Changle	3	2	5	4	3	4	5	5	3	3	3	3	3	2	4	2	2	3	2	2	2	3	2	1	1	1	2	1	2	2	2	2	2	2	3	2	4.25	2.5	2	2	2	4	3
1216	0	11	0	Hangzhou	Lijia	4	5	5	5	4	4	5	4	4	4	4	5	4	3	4	4	4	3	3	3	1	3	4	2	1	2	2	5	3	1	4	2	1	3	2	3	2	3	2	3	3	4	4
1217	0	11	0	Kunming	Erjie	4	5	4	4	5	5	3	4	5	5	5	4	4	3	5	4	3	3	3	4	3	3	3	2	2	3	2	3	3	1	4	4	1	1	1	3	3	2	2	3	3	2	2
1218	1	11	1	Kunming	Lianhua	4	4	3	4	5	4	3	3	3	3	5	5	5	3	4	1	3	3	3	5	3	4	1	2	1	1	2	3	4	1	3	5	2	3	1	2	2	2	4	5	5	2	4
1219	1	11	1	Kunming	Wuhua	5	5	5	5	5	5	5	4	4	3	5	4	5	5	5	5	4	3	5	4	3	4	4	2	1	1	2	5	3	2	1	5	1	4	2	3	2	3	3	4	4	2	4
1220	1	11	1	Kunming	Yunda	5	4	4	3	5	2	3	3	4	3	2	3	3	2	4	3	2	3	4	2.75	1	1	1	2	1	1	2	2	3	1	2	3	4	4	2	4	4	3	2	4	2	4	3
1221	0	11	0	Xishuangbanna	Changle	5	4	5	5	4	4	4	4	3	4	4	4	5	3	3	3	2	3	3	3	2	2	2	2	2	2	2	4	3	1	1	2	3	2	2	2	3	2	2	2	2	3	2
1222	0	11	0	Xishuangbanna	Erxiao	4	4	5	4	5	4	4	5	5	4	5	4	4	3	3	2	4	3	3	3.5	2	4	4	2	2	2.75	2	3	2	1	3	3	1	3	2	2	2	2	2	3	3	3	3
1223	0	11	0	Xishuangbanna	Erxiao	5	4	5	4	5	5	4.5	5	4.25	4	5	5	4	3	4	4	4	3	3	3	3	3	4	2	1	1	2	3	2	2	2	3	4	3	4	2	2	2	2	3	3	4	5
1224	0	11	0	Xishuangbanna	Changle	2	4	1	5	4	3.5	3	5	4	2	3	2	3	3	4	2	5	3	1	1	4	2	3	2.25	5	3	2	1	4	3	2	5	2	1	3	3	2	1	3	3	5	4	5
1225	0	11	1	Hangzhou	Shengli	5	5	5	5	5	5	5	5	5	5	5	5	5	3	3	3	3	3	3	3	3	3	3	3	1	1	2	5	4	1	5	4	1	4	1	4	4	4	1	1	1	1	1
1226	1	11	1	Hangzhou	Shengli	5	5	5	4	5	2	5	5	5	3	4	5	5	5	5	2	4	3	3.75	1	1	1	3	3	1	1	2	2	3	1	4	2	1	2	1	5	5	5	5	5	5	5	5
1227	1	11	1	Kunming	Lianhua	5	5	5	5	5	5	5	5	5	5	5	5	5	4	5	4	3	3	4.5	3	3	4	3	3	2	1	2	3	4	2	3	3	1	2	1	4	4	5	4	5	5	1	2
1228	0	11	0	Xishuangbanna	Erxiao	4	5	5	4	4	3	4	3	4	3	5	4	4	3	4	3	4	3	1	2	2	2	2	3	1	1	2	3	2	2	5	3	4	2	3	3	2	1	2	1	2	2	2
1229	1	11	0	Xishuangbanna	Zhongxin	4	2	5	5	5	4	5	5	4	3	4	3	4	3	3	3	2	3	2	4	2	4	4	3	3	3	2	3	4	2	2	3	2	2	4	2	2	2	2	2	2	2	3
1230	1	11	1	Xishuangbanna	Yixiao	4	4	4	3	3	3	3	2	2	2	3	3	3	3	3	3	3	3	4	3	3	2	2	3	3	3	2	3	2	2	1	2	2	2	3	2	2	2	2	3	3	2	3
1231	0	11	1	Hangzhou	Fenghuang	5	5	5	5	4	5	5	5	5	5	5	5	5	5	4	4	3	3	5	3	5	4	2	4	1	4	2	4	5	1	4	5	2	5	5	5	4	4	4	5	5	5	5
1232	1	11	1	Xishuangbanna	Shiji	5	5	5	5	5	5	4	4	5	5	5	4	5	3	4	3	4	3	4	2	2	2	3	4	3	3	2	3	2	1	3	3	2	3	2	3	3	2	2	3	3	2	3
1233	0	11	0	Hangzhou	Lijia	5	5	5	4	5	4	4	4	5	5	4	5	5	3	5	4	4	3	4	5	4	4	4	5	5	3	2	5	3	1	1	4	3	3	1	3	5	2	3	3	2	4	5
1234	0	11	0	Hangzhou	Lijia	4	3	5	5	5	5	4	5	5	5	2	5	5	4	5	4	3	4	5	4	2	5	1	1	1	5	2	5	4	1	2	1	1	2	1	3	1	3	1	3	5	3	1
1235	0	11	0	Hangzhou	Lijia	4	3.75	2	5	4	2	4	4	5	1	4	4	4	4	4	2	5	4	3	2	1	3	3.75	1	4	1	2	3	3.5	1	3	4	4	4	1	4	3	5	3	4	2	5	1
1236	1	11	0	Hangzhou	Lijia	3	4	4	3	4	3	3	2	2	2	2	2	3	2	3	3	3	4	4	3	3	3	1	1	1	1	2	3	3	2	3	1	1	2	1	3	2	3	3	2	3	4	4
1237	0	11	1	Hangzhou	Cuiyuan	3	5	5	3	4	3	4	3	3	3	4	4	4	2	3	2	3	4	2	3	2	2	3	1	1	1	2	2	3	2	4	2	1	3	2	3	3	3	3	3	2	2	3
1238	0	11	1	Hangzhou	Fenghuang	4	3	5	4	5	4	5	4	5	4	4	3	5	3	4	3	2	4	3	2	1	2	1	1	1	1	2	1	3	3	1	4	1	4	1	2	1	1	3	2	2	3	1
1239	0	11	1	Kunming	Wuhua	5	4	5	5	5	5	5	5	5	5	4	5	3	3	4	3	3	4	4	2	2	4.25	2	1	1	1	2	2	4	1	2	3	3	4	2	3	3	2	2	2	2	2	3
1240	1	11	1	Kunming	Lianhua	4	5	5	3	3	5	4	4	4	4	4	3	2	4	3	2	2	4	2	3	1	2	2	1	2	2	2	4	5	2	2	4	4	4	3	5	5	5	4	5	5	5	5
1241	1	11	1	Kunming	Wuhua	5	5	5	5	5	5	5	5	2	5	5	1	5	3	4	5	1	4	4	3	1	4	3	1	1	1	2	4	5	1	4	1	1	1	1	3	1	1	3	1	5	5	5
1242	1	11	1	Kunming	Yunda	4	5	4	5	4.75	4	3	5	5	4	4	4	5	2	4	2	1	4	3	2	2	4.75	4.25	1	2	1	2	4	3	1	2	4	1	5	2	3	3	2	2	3	5	1	1
1243	1	11	0	Xishuangbanna	Changle	5	2	5	4	4	4	4	4	4	5	4	3	4	2	3	3	2	4	2	1	1	1	2	1	1	1	2	2	1	3	5	2	2	2	1	1	2	1	1	2	1	2	1
1244	1	11	0	Xishuangbanna	Erxiao	3	4	4	3	4	5	4	4	3	2	4	4	4	3	4	3	4	4	3	2	1	1	3	1	1	1	2	3	2	2	4	4	2	4	2	2	2	2	2	3	3	2	2
1245	1	11	1	Xishuangbanna	Shiji	5	5	5	5	5	1	4	4.5	3	4.25	4	4	5	2	4	2	4	4	3.75	5	5	5	2	1	2	1	2	2	3	4	4	5	5	2	3	5	2	2	5	5	5	5	5
1246	1	11	1	Hangzhou	Shengli	5	5	5	5	5	5	4	5	4	4	5	5	5	3	4	3	4	4	3	3	3	5	3	2	1	1	2	3.25	3	1	3	4	1	3	4	4	4	4	2	5	5	2	2
1247	0	11	0	Kunming	Erjie	3	5	5	4	5	4	4	4	4	3	5	4	4	3	3	3	3	4	3	3	2	3	3	2	1	1	2	3	1	1	3	5	2	2	2	2	1	1	1	2	3	4	5
1248	0	11	0	Kunming	Erjie	4	4	5	3	5	5	4	4	5	5	5	3	5	3	5	3	5	4	1	4	1	2	3	2	3	3	2	2	2	2	3	3	2	3	2	3	3	3	4	4	4	4	4
1249	0	11	0	Kunming	Zhugou	4	5	4	5	5	5	3	5	5	4	5	4	5	3	4	5	5	4	5	4	5	4	3	2	4	2	2	4	5	1	3	3	1	4	4	5	4	4.25	3	5	4	4.5	5
1250	0	11	0	Kunming	Zhugou	5	5	5	5	5	5	4	4	4	3	5	5	4	5	4	5	5	4	5	3	3	4	4	2	4	4	2	5	3	1	5	3	2	3	1	3	3	3	3	3	3	4	3
1251	1	11	0	Kunming	Erjie	5	3	5	5	4	5	4	5	5	5	4	3	5	2	3	3	2	4	3	2	2	2	3	2	1	1	2	3	2	1	3	3	2	3	4	3	3	2	2	3	2	4	2
1252	0	11	0	Xishuangbanna	Erxiao	5	4	5	4	5	4	4	4	4	4	5	4	4	2	4	3	4	4	2	3	2	2	2	2	1	1	2	3	1	2	2	2	3	3	3	3	2	2	2	2	3	3	3
1253	1	11	0	Xishuangbanna	Changle	4.25	3	4	5	4	5	1	4	3	4	4	3	5	3	5	2.25	3	4	5	3	3	3	2	2	3	3	2	4	1	1	3	3	2	3	2	3	3	2	2	3	3	4	3
1254	1	11	0	Xishuangbanna	Changle	4	2	3	2	3	3	3	5	4	3	5	5	4	2	3	5	2	4	3	1	2	4	5	2	5	2	2	2.5	5	3	2	2	3	1	4	2	3	3	5	2	4	2	5
1255	1	11	0	Xishuangbanna	Erxiao	5	5	5	4	5	5	5	5	5	3	4	4	5	3	4	3	3	4	4	4	3	3	2	2	1	1	2	3	3	2	5	4	2	3	4	2	2	2	2	3	2	4	3
1256	0	11	1	Xishuangbanna	Shiji	4	4	5	5	5	5	5	5	5	5	5	4	5	4	4	3	3	4	4	2	2	4	2	2	2	2	2	2	2	2	5	2	2	3	2	3	3	3	2.5	2	2	2	2
1257	0	11	1	Xishuangbanna	Yixiao	5	3	5	5	5	5	5	5	5	5	5	4	5	4	4	5	5	4	4	4	4	5	5	2	3	4	2	4	5	1	5	3	1	4	2	5	5	5	5	5	4	5	3
1258	1	11	1	Xishuangbanna	Shiji	3	4	3	3	4	3	3	3	2	3	2	5	4	2	3	1	1	4	3	2	1	1	2	2	1	1	2	2	1	1	3	1	1	1	1	2	2	3	3	3	2	4	2
1259	1	11	0	Hangzhou	Nanshan	5	5	5	4	3	3	4	4	5	4	3	2	3	5	4	5	4	4	1	5	2	5	1	3	2	3	2	4	2	1	3	1	2	3	1	2	2	4	1	3	3	1	2
1260	1	11	0	Hangzhou	Nanshan	5	5	5	5	5	4	4	3	5	4	5	5	3	2	4	3	3	4	2	1	1	2	3	3	1	1	2	2	4	2	2	3	3	2	4	4	3	4	4	4	5	2	2
1261	0	11	1	Hangzhou	Shengli	3	3	4.75	2	5	3	4	3	4	5	5	3	5	2	3	2	3	4	3	1	2	1	4	3	2	2	2	2	3	1	3	4	1	4	1.25	3	1	4	4	3	4	2	4
1262	1	11	0	Kunming	Erjie	5	5	5	5	5	4	3.75	5	4	3	5	4	5	3	4	4	4	4	5	5	2	2	2	3	1	1	2	3	2	2	5	4	4	3	2	3	3	3	3	3	2	1	5
1263	0	11	0	Xishuangbanna	Changle	3	2	5	4	5	4	4	5	5	5	3	3	3	3	5	2	3	4	3	2	3	3	3	3	1	1	2	3	1	2	2	2	2	3	3	2	3	2	2	3	3	3	3
1264	0	11	0	Xishuangbanna	Zhongxin	4	5	5	4	4	4	5	4	4	4	5	4	4	3	4	3	4	4	4	3	3	4	3	3	3	3	2	3	3	2	3	3	2	3	2	2	3	3	2	3	3	3	3
1265	1	11	0	Xishuangbanna	Zhongxin	4	5	4	3	4	5	5	4	4	4	4	2	4	3	5	4	4	4	3	3	1	4	3	3	3	3	2	3	3	1	3	3	2	3	1	3	3.75	3	3	4	3.25	4	3
1266	1	11	0	Xishuangbanna	Erxiao	4	4	4	5	4	5	4	4	4	4	4	4	5	3	4	2	3	4	3	4	4	4	2	3	3	2	2	3	3	3	5	3	3	2	3	3	3	3	1.5	3	4	4	4
1267	0	11	1	Xishuangbanna	Yixiao	4	5	5	4	5	4	5	4	5	4	5	5	5	4	5	5	5	4	4	3	3	4	5	3	2	3	2	3	5	4	2	5	5	5	3	5	5	5	5	5	5	5	5
1268	0	11	1	Xishuangbanna	Yixiao	5	5	5	5	5	4	4	5	4	3	4	5	5	3	4	5	5	4	5	4	3	4	2	3	3	3	2	4	1	5	3	4	1	1	5	3	4	1	1	5	5	5	5
1269	0	11	1	Xishuangbanna	Yixiao	4	5	5	4	5	5	5	5	5	5	5	4	4	5	5	4	5	4	4	4	3	4	4	3	4	5	2	3	2	2	2	5	2	4	2	4	4	4	2.75	4	4	3	3
1270	1	11	1	Xishuangbanna	Shiji	4	5	5	5	5	5	5	4	5	5	5	5	5	4	4	4	4	4	4	3	3	4	3	3	2.75	4	2	4	1	1	3	4	4	2	3	2	4	3	2	3	2	4	1
1271	1	11	1	Xishuangbanna	Shiji	4	4.5	4	3	4	3	4	4	3	3	3	4	5	3	4.25	3	3.75	4	3	2.75	2	2	2	3	2	2	2	2	1	1	3	2	1	2	2	4	4	4	4	3	3	3	3
1272	1	11	1	Xishuangbanna	Yixiao	5	5	5	5	5	5	5	5	5	5	5	5	5	4	4	4	4	4	4	3	2	4	4	3	3	3	2	4	3	1	2	4	1	5	4	4	4	2	3	4	4	5	5
1273	1	11	1	Xishuangbanna	Yixiao	4	4	5	4	4	5	5	5	5	5	4	3	4	3	4	4	3	4	3	2	2	3	4	3	3	3	2	3	2	1	4	4	2	2	1	3	3	3	3	4	4	4	3
1274	0	11	1	Hangzhou	Cuiyuan	5	5	5	5	5	4	5	5	5	5	5	5	5	5	4	4	2	4	3	1	1	2	5	4	5	4	2	5	5	3	4	5	2	5	2	5	5	5	5	5	5	1	4
1275	1	11	1	Hangzhou	Shengli	5	5	5	1	5	5	5	5	5	3	1	3	3	4	4	4	4	4	5	2	2	2	3	4	1	1	2	2	2	2	3	2	2	2	2	2	3	2	2	2	2	2.5	2
1276	1	11	1	Hangzhou	Shengli	5	5	5	5	5	5	5	5	5	5	5	5	5	4	4	4	4	4	2	4	4	4	4	4	1	1	2	3	4	1	2	3	2	3	1	4	3	3	3	3	3	3	2
1277	1	11	1	Hangzhou	Fenghuang	4	4	5	4	5	4	4	4	4	4	4	2	4	4	4	4	4	4	3	3	2	3	3	4	3	4	2	4	4	1	4	2	1	4	1	3	3	3	3	3	4	2	4
1278	0	11	0	Kunming	Zhugou	4	3	5	5	5	5	4	5	4	5	3	3	4	4	5	4	3	4	5	2	5	4	3	4	4	5	2	1	2	2	5	2	2	1	2	2	2	1	2	1	2	1	2
1279	1	11	0	Kunming	Erjie	4	5	5	5	5	4	4	3	5	3	5	2	5	5	5	4	3	4	3	5	2	4	4	4	1	1	2	2	3	1	4	1	1	2	1	5	5	5	2	4	3	4	3
1280	0	11	1	Kunming	Yunda	5	5	4	5	5	4	4	3	5	5	5	3	5	5	5	4	4	4	4	4	4	5	5	4	5	5	2	5	5	1	3	5	1	5	2	5	5	5	5	3	3	4	4
1281	1	11	0	Xishuangbanna	Changle	4	4	5	3	5	4	3	5	5	4	4	3	4	3	3	5	4	4	5	5	4	4	5	4	4	5	2	5	1	5	1	1	1	1	2	1	2	2	2	5	3.5	5	5
1282	1	11	0	Xishuangbanna	Zhongxin	5	5	5	5	5	5	5	5	4	4	4	2	4	4	5	3	4	4	5	3	2	2	3	4	2	2	2	4	2	2	4	4	2	5	4	5	5	4	3	5	5	4	5
1283	0	11	1	Xishuangbanna	Yixiao	4	5	5	4	5	5	5	4	5	4	4	4	5	2	2	3	2	4	5	1	3	3	4	4	2	2	2	2	3	2	3	1	1	2	2	2	1	2	2	1	1	1	1
1284	1	11	1	Xishuangbanna	Yixiao	5	5	5	5	5	5	5	5	5	5	5	5	5	4	4	4	4	4	4	4	4	4	4	4	4	4	2	2	3	1	2	2	2	2	2	4	2	2	4	4	4	4	1
1285	1	11	1	Xishuangbanna	Yixiao	4	4	4	4	5	4	5	5	5	5	4	4	4	4	4	4	3	4	4	3	1	5	4	4	3	3	2	4	4	3	4	4	3	4	5	5	4	4	3	4	4	4	4
1286	0	11	1	Kunming	Yunda	5	5	5	5	5	5	5	5	4	4	5	5	5	4	4	3	3	4	3	4	2	2	5	5	2	5	2	5	4	1	4	5	2	4	3	3	3	4	5	4	5	3	4
1287	1	11	1	Kunming	Lianhua	5	5	5	5	4	4	4	4	4	4	4	4	3	4	5	5	4	4	4	4	4	3	3	5	1	3	2	4	4	1	5	4	4	4	4	5	5	5	3	5	5	4	3
1288	1	11	1	Kunming	Wuhua	5	4	5	5	5	5	5	4	4	4	5	3	5	4	5	3	3.25	4	4	4	2	5	5	5	4	5	2	4	5	1	4	4	5	4	2	5	5	5	5	5	2.75	3.5	3
1289	0	11	1	Xishuangbanna	Shiji	4	4	5	4	3	3	3	3	4	5	4	5	3	3	4	2	3	4.25	5	2	3	3	4	5	2	4	2	5	3	1	1	4	1	3	2	2	1	3	2	3	4	5	3
1290	0	11	1	Xishuangbanna	Shiji	4	5	5	5	5	5	5	4	5	5	5	3	5	5	5	5	5	4.75	4	4.25	3	3	3	3	3	2	2	4	4	1	4	3	1	3	1	3	3	3	3	3	3	3	3
1291	1	11	0	Hangzhou	Nanshan	5	5	5	5	5	5	5	5	5	5	5	1	5	5	2	1	2	5	5	1	1	1	2	1	1	1	2	3	4	1	2	1	1	3	1	2	2	2	2	4	1	4	4
1292	1	11	1	Hangzhou	Shengli	5	5	5	5	5	5	5	5	5	5	5	5	5	3	3	2	2	5	3	1	1	5	3	1	1	1	2	5	5	1	1	1	1	3	2	4	1	1	1	3	3.5	1	1
1293	1	11	0	Kunming	Erjie	4	3	5	4	5	4	4	5	5	5	5	4	5	3	4	4	4	5	5	5	2	3	3	1	1	1	2	3	3	1	5	3	4	4	3	2	4	2	2	3	3	2	2
1294	1	11	0	Kunming	Zhugou	5	5	4	4	4	4	3.75	3	2	2	5	2	2	3	4	2	4	5	5	3	1	3	3	1	1	1	2	3	3	2	3	4	2	4	1	3	1	1	1	3	5	5	1
1295	0	11	1	Kunming	Wuhua	4	5	5	5	5	5	5	5	5	5	5	5	4	3	4	2	1	5	5	1	2	2	2	1	1	1	2	3	4	2	3	4	2	3	4	3	2	2	3	5	5	2	3
1296	1	11	1	Kunming	Wuhua	5	5	5	5	5	5	5	5	5	5	5	5	5	2	3	4	2	5	5	2	1	4	3	1	2	3	2	3	1	1	2	3	1	5	1	3	4	2	4	2	5	4	3
1297	1	11	1	Kunming	Wuhua	5	5	5	5	5	4	4	5	4	4	4.75	2	3	4	5	2	4	5	3	3	2	4	4.25	1	1	1	2	4	2	1	4	4	1	5	2	4	2	4	3	5	4.25	1	4
1298	0	11	0	Xishuangbanna	Changle	3	3	5	5	5	5	3	5	4	4	3	1	4	2	4	2	3	5	5	3	1	2	3	1	1	1	2	2	4	3	3	2	1	2	3	1	2	1	1	3	2	5	4
1299	1	11	0	Xishuangbanna	Zhongxin	4	3	4	5	4	4	5	5	2	3	3	2	3	1	4	2	3	5	4	2	1	2	4	1	3	2	2	3	1	2	2	1	2	4	3	2	3	2	2	1	3	2	3
1300	0	11	1	Xishuangbanna	Shiji	5	5	5	5	5	5	5	4	5	4	4	5	5	3	5	2	5	5	4	4	3	5	2	1	1	1	2	3	2	2	2	5	3	3	3	2	2	2	3	4	4	5	4
1301	1	11	1	Xishuangbanna	Yixiao	5	5	5	5	5	5	5	5	5	5	5	3	5	5	5	3	2	5	4	3	1	3	5	1	1	1	2	4	2	3	1	2	1	3	2	2	5	5	2	2	2	3	4
1302	1	11	0	Hangzhou	Nanshan	5	5	5	4	4	5	5	5	4	3	5	1	3	3	2	2	4	5	3	1	1	1	4	2	1	1	2	2	3	1	2	2	1	1	1	2	2	2	2	3	3	4	2
1303	1	11	0	Hangzhou	Nanshan	5	5	5	5	4	4	5	4	5	3	5	5	5	3	5	2	5	5	4	3	1	1	3	2	1	1	2	3	4	4	2	2	1	3	1	2	2	2	2	3	3	1	2
1304	1	11	0	Hangzhou	Lijia	4	3	5	4	4	4	4	3	4	3	3	3	3	3	4	2	3	5	4	2	2	3	2	2	2	3	2	2	3	4	3	2	2	3	3	1	2	2	2	3	2	2	4
1305	0	11	1	Hangzhou	Shengli	4	5	4	2	5	3	5	4	5	5	3	4	4	2	2	1	3	5	3	2	1	1	3	2	1	1	2	3	3	1	3	2	1	1	1	3	3	3	3	1	2	1	3
1306	0	11	1	Hangzhou	Cuiyuan	4	5	5	5	5	5	5	5	5	5	4	5	4	3	4	4	5	5	5	3.5	2	2	4	2	1	1	2	4	3	1	3	2	2	5	2	5	5	4	2.75	2	2	2	2
1307	0	11	1	Hangzhou	Cuiyuan	5	5	5	5	5	4	5	5	5	4	5	5	5	3	4	5	5	5	4	5	2	3	4	2	5	2	2	5	5	1	3	5	1	3	1	5	5	5	5	5	4	2	3
1308	0	11	1	Hangzhou	Fenghuang	5	5	5	5	5	5	5	4	5	3	4	3	5	3	4	5	3	5	4	3	1	3	3	2	1	1	2	5	5	1	2	4	1	2	1	3	2	2	2	4	4	2	2
1309	1	11	1	Hangzhou	Shengli	4	5	5	4	5	5	5	5	4	5	5	4	5	5	5	5	5	5	5	3	3	5	5	2	1	1	2	5	5	2	3	5	3	3	1	5	4	5	5	5	5	5	5
1310	1	11	1	Hangzhou	Fenghuang	4	5	5	4	5	5	4	4	4	4	2	1	3	3	5	2	5	5	4	2	2	5	4	2	1	1	2	2	4	1	3	2	1	3	1	3	3	3	3	5	4	2	4
1311	1	11	1	Hangzhou	Fenghuang	4	5	5	4	2	3	5	5	5	4	5	5	4	4	4	3	2	5	5	1	1	1	5	2	1	1	2	4	5	1	3	4	1	3	1	5	4	5	5	5	5	2	3
1312	0	11	0	Kunming	Erjie	4	4	5	5	5	4	4	4	5	5	3	5	5	4	3	4	5	5	1	4	1	5	5	2	4	3	2	5	3	2	3	3	2	5	2	3	3	3	3	4	4	3	3
1313	0	11	0	Kunming	Zhugou	4	5	5	4	5	4	3.75	3	4	5	4	4	4	3	3	4	4	5	3	5	4	4	3	2	1	1	2	4	3	1	5	4	2	2	2	3.5	3	2	2	2	3	5	1
1314	1	11	0	Kunming	Zhugou	5	5	5	4	4	5	4	4	5	5	4	1	4	3	4	3	4	5	3	3	3	4	2	2	1	2	2	3	4	4	5	3	5	2	2	3	2	2	2.5	2	3	2	3
1315	0	11	1	Kunming	Wuhua	5	4	5	4	5	5	5	4	5	5	5	3	4	4	5	3	3	5	3	5	2	3	5	2	1	2	2	5	3	1	3	5	1	4	2	5	5	5	5	3.5	2.75	5	3
1316	0	11	1	Kunming	Yunda	4	5	5	5	5	5	5	5	5	5	5	5	5	4	5	1	5	5	5	2	1	4	4	2	1	1	2	5	5	1	5	4	1	5	1	5	5	5	5	4	4.25	4	4
1317	1	11	1	Kunming	Wuhua	4	5	5	5	5	3	5	5	4	4	5	2	4	3	5	2	5	5	4	1	1	4	3	2	1	1	2	3	5	1	5	5	2	1	1	2	1	3	1	5	5	1	1
1318	1	11	1	Kunming	Wuhua	5	5	5	5	5	5	4	4	4	4	5	4	5	3	4	3	4	5	4	4	2	4	5	2	1	1	2	3	4	1.25	5	4	3	4	2	4	3.25	3	3.5	2	4	2	4
1319	1	11	1	Kunming	Yunda	5	5	5	5	5	5	5	5	5	5	5	4	5	4	5	3	5	5	4	3	3	4	3	2	2	2	2	4	5	3	5	4	2	2	3	4	4	4	3	2	5	2	3
1320	1	11	1	Kunming	Yunda	5	5	5	5	5	4	5	5	4	5	5	5	5	4	4	4	5	5	4	5	4	5	5	2	1	1	2	5	5	2	4	5	5	3	2	5	5	5	5	5	5	5	4
1321	1	11	0	Xishuangbanna	Changle	5	3	4	5	5	5	3	4	4	4	4	3	4	3	5	2	4	5	2	2	1	2	2	2	4	3	2	3	1	1	3	3	2	2	1	5	5	4	5	3	2	3	2
1322	0	11	1	Xishuangbanna	Shiji	5	4	5	5	5	4	5	4	4	5	4	4	5	3	5	4	5	5	5	2	3	4	4	2	3	2	2	4	5	2	3	4.75	3	3.75	2.75	5	5	3	5	3	4	5	5
1323	0	11	1	Xishuangbanna	Shiji	4	5	5	3	5	4	4	5	5	4	5	3	4	3	4	4	4	5	4	3	2	3	2	2	3	3	2	4	1	1	5	4	1	2	2	3	3	3	3	3	3	3	3
1324	1	11	1	Xishuangbanna	Yixiao	5	5	5	5	5	5	4	4	4	4	5	1	5	1	5	2	5	5	5	3	2	5	5	2	1	1	2	4	1	1	5	5	1	2	1	1	1	1	1	1	1	5	5
1325	1	11	1	Xishuangbanna	Yixiao	5	5	5	5	5	5	5	5	5	5	5	5	5	4	5	4	3	5	5	2	3	2	5	2	5	3	2	4	4	2	3	5	1	4	2	5	4	4	4	5	5	5	5
1326	1	11	1	Kunming	Wuhua	4	5	5	4	5	4	5	5	4	5	4	4	4	3	4	2	5	5	4	3	3	5	3	2.25	2	2	2	2	4	2	1	3.75	2	5	1	3	3	3	3	4	4	3	3
1327	1	11	0	Kunming	Zhugou	5	5	5	5	4.5	4	3	4	3	4	5	4	4	3	4	2	3	5	4	2	2	2	3	2.75	2	1	2	2	3	1	4	4	1	3	1	1	3	1	1	3	1	5	2
1328	0	11	0	Hangzhou	Nanshan	4	4	5	2	5	3	5	3	5	3	4	4	4	3	4	2	4	5	4	2	1	3	2	3	1	3	2	3	4	1	3	4	1	4	1	2	4	3	3	3	2	3	2
1329	0	11	0	Hangzhou	Lijia	4	5	5	4	4	3	4	4	4	3	5	5	4	3	4	3	5	5	5	3	2	3	5	3	1	3	2	4	2	1	1	5	3	4	1	2	2	2	2	3	5	2	2
1330	1	11	0	Hangzhou	Nanshan	4	5	5	5	5	4	5	4	5	3	4	5	5	4	5	3	3	5	4	3	2	4	3	3	1	1	2	2	5	2	4	4	2	4	2	2	2	2	2	4	3	2	4
1331	1	11	0	Hangzhou	Lijia	4	5	5	5	5	4	5	5	3	5	5	4	3	4	3	4	5	5	3	5	1	4	3	3	1	1	2	3	3	2	5	4	2	4	3	2	2	2	2	4	5	2	5
1332	1	11	0	Hangzhou	Lijia	5	5	5	5	5	4	4	5	5	5	4	4	5	3	5	3	3	5	4	4	3	5	2	3	1	1	2	3	2	2	5	4	3	5	2	3	3	2	3	5	4	4	5
1333	0	11	1	Hangzhou	Cuiyuan	5	5	5	5	5	5	5	5	5	5	5	5	5	3	3	3	4	5	3	5	5	5	4	3	2	5	2	4	3	3	2	5	5	5	3	5	5	5	5	5	5	5	3
1334	0	11	1	Hangzhou	Fenghuang	5	5	5	5	5	5	5	5	5	5	5	5	5	3	4	5	4	5	4	5	2	5	5	3	1	1	2	5	5	1	5	5	1	4	1	4	4	4	4	4	5	5	5
1335	0	11	1	Hangzhou	Fenghuang	5	5	5	5	5	5	4	4	4	4	4	4	4	3	3	4	2	5	3	3.25	2	2	4	3	2	1	2	5	5	1	3	3	1	3	1	4	2	5	4	3	4	1	4
1336	1	11	1	Hangzhou	Cuiyuan	5	4	5	5	4	5	4	3	3	3	5	4	4	3	4	3	5	5	3	3	3	3	3	3	1	1	2	3	4	2	2	5	3	3	2	4	4	4	3	5	5	2	2
1337	0	11	0	Kunming	Erjie	5	5	5	5	5	5	5	5	5	5	5	5	5	5	5	5	4	5	5	4	4	5	3	3	1	1	2	3	4	1	2	4	1	2	2	3	3	3	3	4	2	3	2
1338	0	11	0	Kunming	Erjie	5	4	5	3	5	4	4	4	5	5	4	3	4	3	5	3	4	5	4	4	3	3	3	3	4	4	2	4	3	1	3	4	1	2	1	2	3	4	2	2	4	2	2
1339	0	11	0	Kunming	Zhugou	4	5	5	4	5	1	5	5	4	5	4	3.25	4	3	4	2	4	5	4	3	3	5	4	3	1	2	2	4	3	1	2	5	4	5	1	2.5	3	5	2	2	3	4	5
1340	0	11	0	Kunming	Zhugou	4	5	5	4	5	4	3	5	5	5	4	5	4	3	5	3	2	5	4	4	2	5	5	3	2	3	2	5	4	1	1	4	4	5	2	4	3	3	2	4	4	5	3
1341	1	11	0	Kunming	Zhugou	5	4	4	3	5	5	3	3	3	3	2	5	4	4	5	3	5	5	5	5	2	3	4	3	1	1	2	4	3	1	2	5	3	3	1	3	3.25	2	1	3	2	3.5	1
1342	0	11	1	Kunming	Lianhua	4	5	5	3	4	3	3	3	3	3	4	2	3	2	4	3	5	5	3	1	1	1	4	3	1	1	2	2	4	1	3	3	1	2	1	5	5	5	5	4	3	5	3
1343	0	11	1	Kunming	Wuhua	4	4	5	4	3	5	3	5	4	4	5	4	3	3	4	4	3	5	3	2	2	3	2	3	2	2	2	3	1	1	1	2	2	4	1	2	3	1	2	5	3	3	3
1344	1	11	1	Kunming	Wuhua	4	5	5	5	5	5	5	5	5	4	4	4	5	4	5	3	3.25	5	4	5	3	4	4	3	3	3	2	4	2	2	5	2	2	2	3	4	3	3	3	3.5	3	4	5
1345	1	11	1	Kunming	Wuhua	5	5	4	4	4	5	4	4	4	5	3	1	4	3	4	2	4	5	5	1	2	1	2	3	1	1	2	3	4	1	4	3	2	2	1	5	4	3	3	3	2	1	3
1346	0	11	0	Xishuangbanna	Zhongxin	5	5	5	5	5	4	5	5	5	5	5	5	5	5	4	4	5	5	4	3	3	5	4	3	3	4	2	4	3	1	1	5	5	5	5	3	4	2	2	5	5	5	5
1347	1	11	0	Xishuangbanna	Erxiao	5	5	5	5	5	5	4	5	4	4	4	5	5	4	5	4	4	5	4	4	4	4	3	3	2	2	2	4	2	2	2	3	4	3	2	2	2	2	2	4	2	4	3
1348	1	11	1	Xishuangbanna	Shiji	5	5	5	5	5	5	4	5	5	4	4	5	4	3	5	4	5	5	4	3	2	4	4	3	2	2	2	2	1	2	5	2	2	2	2	2	2	1	1	2	3.5	1	1
1349	0	11	0	Hangzhou	Lijia	4	5	5	5	5	5	4	4	4	5	5	5	5	4	5	3	4	5	4	5	3	5	5	4	2	3	2	4	4	1	3	5	1	3	1	2	2	2	2	3	2	2	2
1350	1	11	0	Hangzhou	Nanshan	5	5	5	5	5	5	4	4	4	5	5	5	4	4	4	3	5	5	4	3	2	3	4	4	4	4	2	4	4	1	3	3	1	4	1	4	4	4	4	5	4	5	5
1351	1	11	0	Hangzhou	Lijia	4	3	3	4	5	3	5	5	5	4	3	5	5	5	5	4	4	5	5	2	1	4	5	4	5	1	2	2.5	3.5	1	3	2	2	4	1	2	2	3	3	2	5	4	4
1352	1	11	1	Hangzhou	Shengli	4	5	4	4	4	4	3	4	4	3	4	2	4	3	4	3	5	5	3	2	1	3	3	4	2	1	2	3	3	1	5	2	2	2	1	2	1	2	1	2	3	2	4
1353	1	11	1	Hangzhou	Shengli	5	5	5	4	5	5	5	5	5	5	5	3	5	5	5	2	5	5	5	4	1	3	2	4	1	1	2	3	5	2	5	5	2	2	1	5	5	5	5	3	4	2	3
1354	0	11	0	Kunming	Erjie	5	5	5	4	5	5	5	4	5	5	4	4	5	4	5	3	5	5	1	3	4	5	4	4	3	5	2	5	5	1	5	5	5	5	1	5	5	5	5	5	5	5	5
1355	0	11	0	Kunming	Erjie	5	4	5	5	5	5	3	5	4	3	5	4	3	4	5	3	5	5	5	5	4	5	4	4	5	5	2	5	5	1	3.5	5	4	4	1	3	5	5	5	4	3	3	3
1356	0	11	0	Kunming	Erjie	4	5	4	5	4	4	3	3	3	4	4	5	5	3	4	3	3	5	3	4	2	2	5	4	1	1	2	5	3	2	4	5	4	1	5	1	1	1	1	5	1	3	2
1357	0	11	0	Kunming	Zhugou	5	5	5	5	5	5	5	5	5	5	5	5	5	5	2	5	5	5	1	2	5	5	5	4	4	2	2	5	3	1	5	4	1	5	2	2	5	4	3	5	5	4	5
1358	0	11	0	Kunming	Zhugou	5	5	4	4	5	5	3	3	4	3	4	2	2	3	4	4	3	5	3	2	3	2	3	4	4	1	2	4	2	1	5	2	2	1	1.75	2.5	1	4	2	4	1	2	3
1359	0	11	0	Kunming	Zhugou	4	5	5	4	5	3	3	4	4	5	4	3	5	4	5	3	4	5	5	1	2	2	4	4	3	2	2	4	4	1	4	4	1	3	3	5	5	4	2	3	2	5	3
1360	1	11	0	Kunming	Zhugou	3	5	4	4	5	4	3	1	3	4	4	2	5	2	5	4	3	5	5	3	3	4	2	4	3	2	2	4	4	1	4	3	2	3	2	2	5	5	3	5	3	3	2
1361	1	11	0	Kunming	Zhugou	5	1	5	3	5	5	3	3	3	4	3	1	5	4	5	5	4	5	5	4	5	4	5	4	4	5	2	4	3	3	5	3	2	4	1	3	2.75	3	3	4	4	2	4
1362	0	11	1	Kunming	Lianhua	5	5	4	5	4	4	5	4	4	5	4	5	4	5	5	5	5	5	5	4	4	4	5	4	4	4	2	5	5	1	2	3	1	3	1	4	4	2	2	2	1	3	1
1363	0	11	1	Kunming	Lianhua	5	5	5	4	5	4	4	5	4	4	5	3	4	3	5	4	5	5	4	3	2	4	5	4	2	4	2	4	3	2	5	4	1	3	2	3	3	2	3	4	5	5	2
1364	0	11	1	Kunming	Lianhua	5	4	4	5	5	5	4	3	3	2	4	5	5	3	3	5	3	5	5	5	2	1	3	4	1	2	2	1	1	5	5	5	2	3	1	5	5	5	5	3	2	3	5
1365	0	11	1	Kunming	Yunda	5	5	5	5	5	5	5	5	4	3	5	5	5	3	4	3	5	5	4	5	3	2	5	4	2	4	2	5	4	1	5	3	2	2	1	3	3	3	2	5	4	2	5
1366	0	11	0	Xishuangbanna	Changle	5	5	5	5	5	5	4	5	5	5	3	4	5	5	5	5	5	5	5	1	3	5	4	4	4	5	2	3.25	4	4	3	3	1	4	2	5	5	5	4	4	5	3	4
1367	0	11	0	Xishuangbanna	Zhongxin	4	5	5	5	5	4	5	5	5	3	5	4	5	3	4	3	5	5	5	4	3	5	5	4	3	5	2	3	2	4	2	3	4	5	2	4	4	4	3	4	2	4	5
1368	1	11	1	Xishuangbanna	Shiji	5	5	5	5	5	3	5	4	4	4	5	4	4	3	4	5	5	5	5	3	2	4	4	4	3	4	2	3	4	1	5	4	1	2	1	4	4	3	5	5	5	4	4
1369	1	11	0	Hangzhou	Nanshan	5	5	5	5	5	5	5	5	5	5	5	4	4	4	5	3	5	5	5	3	3	5	4	5	1	1	2	5	4	1	2	2	1	5	1	2	2	2	3	5	5	4	5
1370	1	11	0	Hangzhou	Nanshan	5	5	5	5	5	5	5	5	5	4	4	5	5	4	4	5	4	5	5	4	4	5	5	5	3	3	2	5	3	1	3	4	2	5	1	3	5	5	5	5	5	5	5
1371	1	11	0	Hangzhou	Nanshan	5	5	5	5	5	5	5	5	5	5	5	5	5	4	5	5	5	5	5	4	2	5	5	5	5	5	2	4	3	1	1	5	2.5	2	2	5	5	5	5	4	4	4	3
1372	1	11	0	Hangzhou	Nanshan	5	5	5	5	5	5	5	5	5	5	5	5	5	5	5	5	5	5	5	5	5	5	5	5	3	3	2	5	5	5	4	5	1	5	1	5	5	5	5	5	5	5	5
1373	1	11	0	Hangzhou	Nanshan	5	5	5	5	5	5	5	5	5	5	5	5	5	5	5	5	5	5	5	5	4	5	5	5	5	5	2	5	5	5	3	5	1	4	1	5	5	5	5	5	5	5	4
1374	1	11	0	Hangzhou	Nanshan	5	5	5	5	5	5	5	5	5	5	4	5	5	5	4	5	5	5	5	3	2	4	5	5	1	1	2	4	3	1	5	3	2	4	3	4	4	4	4	5	5	3	4
1375	0	11	1	Hangzhou	Cuiyuan	5	5	5	5	5	5	5	5	5	5	5	4	5	4	5	5	5	5	5	5	5	5	5	5	5	5	2	3	4	1	3	5	2	4	5	5	5	5	5	4	4	5	5
1376	1	11	1	Hangzhou	Shengli	5	5	5	5	5	5	5	5	5	5	5	5	5	4	3	1	1	5	5	1	1	1	3.5	5	5	1	2	2	5	1	2	1	1	1	1	5	5	5	5	2	2	2	3
1377	0	11	0	Kunming	Erjie	5	5	5	5	5	5	5	5	5	5	5	3	5	4	4	3	3	5	5	5	3	2	5	5	1	5	2	4	4	2	2.75	2	4	3	2	4	4	3	3	4	4	3	3
1378	0	11	0	Kunming	Zhugou	5	5	5	5	4	1	5	4	4	5	4	5	5	1	2	3	5	5	5	2	3	1	3	5	5	5	2	4	1	1	3	3	1	1	1	5	5	5	5	3	2	5	2
1379	0	11	1	Kunming	Lianhua	5	5	5	5	5	5	5	5	5	5	5	5	5	4	5	5	5	5	4	5	3	5	5	5	3	3	2	5	5	1	4	5	2	5	2	5	5	5	5	5	5	5	5
1380	0	11	1	Kunming	Wuhua	5	5	5	5	5	5	5	4	4	5	5	4	5	4	4	3	5	5	5	4	2	5	3	5	2.75	3	2	3	4	3	4	4	2	3	4	4	3.75	3	4	4	3	4	3
1381	0	11	1	Kunming	Yunda	5	5	5	5	5	5	5	5	5	5	5	5	5	5	5	5	5	5	5	5	5	5	5	5	3	3	2	4	5	2	2	5	3	3	2	5	5	5	5	5	5	5	5
1382	1	11	1	Kunming	Wuhua	5	5	5	5	5	5	5	5	5	5	4	5	5	4	5	3	4	5	4	4	3	5	5	5	2	1	2	4	3	1	2	2	1	3	3	3	3	3	3	4	5	5	4
1383	0	11	0	Xishuangbanna	Erxiao	5	5	5	5	5	5	4	5	5	5	5	5	5	5	5	4	5	5	5	4	5	5	4	5	5	5	2	5	3	4	2	5	4	4	3	4	5	2	2	5	5	4	5
1384	0	11	0	Xishuangbanna	Erxiao	5	4	5	5	5	5	5	5	5	5	5	5	5	2	5	5	5	5	5	5	2	5	5	5	1	5	2	5	5	1	3	5	1	2	1	5	5	2	2	2	5	5	5
1385	1	11	1	Xishuangbanna	Shiji	4	5	5	5	5	5	5	4	4	3	5	2	5	5	5	3	5	5	5	5	2	5	5	5	2	2	2	5	5	1	2	5	2	1	3	4	4	4	4	4	4	3	2
1386	1	11	1	Xishuangbanna	Yixiao	5	5	5	5	5	5	5	5	5	5	5	5	5	5	4	4	5	5	5	5	5	5	4	5	5	5	2	5	5	1	2	2	1	2	3	5	5	5	5	5	5	5	5
1387	1	11	1	Xishuangbanna	Yixiao	4.5	4.5	4.75	4.25	4.25	4.5	4.5	4.25	4.25	4.25	4.25	3.75	4.25	4	5	4	4	5	5	3	4	4	5	5	3	3	2	3	3	1	1	4	2	5	5	5	5	5	5	5	5	5	4
1388	1	11	1	Xishuangbanna	Yixiao	5	5	5	5	5	5	5	5	5	5	5	5	5	5	5	5	5	5	5	5	5	5	5	5	5	5	2	4	2	1	4	5	2	5	2	2	2	2	2	3	3	5	5
1389	1	11	1	Xishuangbanna	Yixiao	4	5	5	5	5	5	5	5	5	5	5	5	5	4	5	4	5	5	5	5	4	5	5	5	5	5	2	5	5	1	1	5	1	4.25	5	5	5	5	5	5	5	5	5
1390	1	11	1	Xishuangbanna	Yixiao	5	5	5	5	5	5	5	5	5	5	5	5	5	5	5	1	5	5	5	5	1	5	5	5	5	5	2.25	2.25	5	1	3.75	5	1	3	1	5	5	5	5	5	5	5	2
1391	1	11	0	Kunming	Zhugou	4	2	4	1	4	4	1	4	4	3	3	3	3	3	2	4	3	1	2	1	1	2	4	1	1	3	3	3	2	1	4	3	3	1	1	3	2	1	1	2	3	3	5
1392	0	11	0	Xishuangbanna	Changle	3	3.75	4	5	1	4.5	2	5	4	1	3	2	4.75	3	4	3.25	3.25	1	2	2	2.5	4	2	1	1	1	3	1	4	4	1	1	2	2.75	4	2	2	2	2	1	1	1	1
1393	0	11	0	Xishuangbanna	Changle	4	5	4	5	4	4	1	3	1	4	4	5	3	2	2	1	1	1	1	1	1	2	1	1	1	1	3	3	2	4	2	2	4	1	3	1	2	1	1	2	3	2	1
1394	1	11	1	Hangzhou	Shengli	5	5	5	3	3	3	3	3	3	3	1	4	4	2	1	2	2	1	2	2	2	3	2	2	1	1	3	3	2	1	2	2	2	2	1	2	2	3	4	3	3	2	3
1395	0	11	1	Kunming	Wuhua	5	5	5	5	5	5	5	5	5	5	5	5	5	4	2	1	3	2	1	2	1	3	2	4	3	2	3	4	2	4	1	2	3	1	3	4	4.25	5	2	4	2	4	3
1396	1	11	1	Hangzhou	Shengli	4	4	4	5	5	5	2	1	1	1	1	5	4	3	3	3	2	2	1	3	2	2	5	5	1	1	3	2	4	1	2	1	1	1	1	5	3	2	3	4	3	1	5
1397	1	11	0	Hangzhou	Lijia	4	5	5	3	3	4	2	3	4	3	3	1	4	3	4	3	4	3	3	1	2	2	2	1	1	1	3	2	1	1	2	2	1	2	1	2	2	2	1	2	2	1	2
1398	0	11	1	Kunming	Lianhua	5	4	5	4	5	3	5	4	3	4	5	5	5	3	3	3	3	3	3	3	2	2	2	1	3	3	3	3	2	1	1	3	3	2	1	3	3	3	3	3	3	3	3
1399	0	11	0	Xishuangbanna	Zhongxin	4	5	5	4	5	5	5	5	5	3	4	3	5	2	3	3	2	3	3	2	2	2	3	1	1	1	3	2	2	2	1	4	2	2	2	2	3	3	1	2	2	2	2
1400	0	11	0	Xishuangbanna	Erxiao	5	5	5	3	5	5	5	5	4	5	4	3	5	3	3	3	2	3	3	1	1	3	2	1	3	1	3	1	3	2	3	4	3	1	4	3	3	1	1	3	3	4	3
1401	1	11	0	Xishuangbanna	Changle	5	4	4	3	4	3	5	3	3	2	4	4	3	1	2	1	1	3	3	1	1	1	1	1	1	1	3	3	2	2	2	3	2	3	3	1	2	1	1	1	3	1	1
1402	1	11	0	Xishuangbanna	Zhongxin	5	5	5	3	5	4	5	4	3	4	3	2	3	3	4	4	5	3	1	4	2	5	2	1	2	3	3	4	4	1	1	4	3	3	1	3	4	2	2	3	2	4	2
1403	1	11	1	Hangzhou	Shengli	4	5	5	3	5	4	5	3	4	4	4	4	5	3	3	3	5	3	4	4	2	3	3	2	1	1	3	3	3	2	2	2	2	5	3	4	4	4	2	4	3	2	3
1404	0	11	0	Kunming	Zhugou	3	5	5	5	5	5	4	4	5	5	3	5	5	5	3	2	2	3	3	2	2	3	2	2	3	2	3	3	1	4	2	3	2	1	2	1	3	1	1	3	1	3	1
1405	0	11	0	Xishuangbanna	Changle	5	3	4	4	4	5	3	5	3	1	5	3	5	2	4	3	5	3	1	2	1	5	4	2	2	3	3	4	1	4	2	4	1	2	3	4	4	3	3	4	4	5	3
1406	0	11	0	Xishuangbanna	Zhongxin	5	5	5	5	4	4	5	5	5	4	4	3	5	3	4	2	4	3	4	2	3	5	5	2	2	2	3	3	2	4	1	4	5	3	4	5	5	5	5	3	5	5	4
1407	0	11	0	Xishuangbanna	Zhongxin	5	5	4	3	1	1	5	5	4	4	1	5	2	3	2	2	3	3	1	2	3	4	2.75	2	2	3	3	2.75	2	1	4	3	2	1	2	2.25	3	4	3	2	2	2	3
1408	1	11	1	Xishuangbanna	Shiji	5	5	5	5	5	5	4	5	5	5	5	5	5	3	3	2	3	3	2	2	2	3	2	2	1	1	3	2	1	1.75	3	2	1	1	1	1	2	2	4.25	2	2	2	2
1409	0	11	1	Hangzhou	Fenghuang	4	5	5	4	5	5	5	5	5	4	5	5	5	4	3	5	4	3	2	2	1	2	5	3	1	1	3	5	5	1	1	5	1	2	1	5	5	3	2	2	2	1	2
1410	1	11	1	Kunming	Yunda	3	5	4	4	5	3	3	3	3	3	2	4	3	3	3	3	3	3	3	3	3	3	3	3	3	3	3	2	4.25	1	1	1	1	1	1	2	2	2	3	2	2	2	1
1411	1	11	0	Xishuangbanna	Changle	4	5	5	4	5	5	3	5	3	1	3	3	5	3	4	4	2	3	2	2	4	4	4	3	4	5	3	2	2	2	1	4	2	3	2	3	3	3	2	3	5	5	4
1412	1	11	1	Xishuangbanna	Shiji	5	3	4	3	4	4	3	4	3	2	4	3	4	3	4	3	4	3	5	3	2	3	4	3	5	4	3	4	4	4	2	5	2	2	1	3	4	4	4	5	4	5	5
1413	0	11	1	Hangzhou	Fenghuang	5	5	5	4	4	5	4	4	5	3	5	4	5	3	3	4	4	3	4	3	2	4	4.5	4	4	4	3	5	4	1	2	5	2	3	3	3	3	3	4	3	3	3	4
1414	1	11	1	Xishuangbanna	Yixiao	4	4	4	4	4	3	3	3	5	3	3	3	5	4	4.5	3	4.75	3	3	2	2	2	2	4.5	4.25	1	3	1	1	1	3	1	1	1	1	2	1	1	5	1	3.75	1	2
1415	0	11	0	Hangzhou	Lijia	4	2	4	4	4	4	4	4	4	4	4	4	4	5	5	4	5	3	5	5	3	5	5	5	2	4	3	3	1	1	3	2	1	3	4	2	2	2	2.75	2	3	3	5
1416	1	11	1	Xishuangbanna	Yixiao	5	5	5	5	5	4	5	4	4	3	5	4	5	4	5	3	4	3	4.5	4	4	4	4	5	3	3	3	3	3	4	2	4	4	3	4	4	4	4	5	5	4	4	5
1417	0	11	0	Kunming	Erjie	4	4	4	4	5	4	4	4	4	4	5	5	4	2	3	3	3	4	2	2	1	2	1	1	1	1	3	3	3	3	4	4	3	4	4	4	3	3	3	4	3	2	4
1418	0	11	1	Kunming	Wuhua	5	5	5	4	4	4	5	5	5	5	4	5	5	2	3	2	1	4	2	2	1	1	2	1	1	1	3	2	4	1	3	4	2	2	1	5	4	3	5	2	2	2	3
1419	0	11	0	Xishuangbanna	Zhongxin	5	5	5	5	5	5	5	4	5	4	5	4	5	3	4	2	2	4	4	2	1	2	1	1	2	1	3	2	2	3	3	4	2	3	3	2	4	2	2	3	3.75	4	4
1420	0	11	0	Xishuangbanna	Erxiao	2	5	5	1	5	5	4	5	2	1	5	3	5	2	2	1	1	4	4	5	1	1	1	1	1	1	3	2	2	1	4	5	5	3	3	1	1	2	2	1	1	2	1
1421	1	11	0	Xishuangbanna	Zhongxin	5	4	5	3	5	4	5	4.25	3	4	5	3	4	2	3	2	3	4	3	4	3	3	1	1	1	1	3	2	4	4	1	4	1	3	2.75	3	3	3	1	2	3	3	3
1422	1	11	0	Xishuangbanna	Erxiao	4	5	5	5	5	5	4	4	3	3	3	5	4	2	1	2	2	4	3	2	1	2	1	1	1	3	3	4	1	1	1	2	1	3	5	1	1	1	1	2	1	1	3
1423	0	11	1	Xishuangbanna	Shiji	4	5	4	5	4	5	4	5	5	3	4	5	4	3	3	2	3	4	3	1	1	3	2	1	1	1	3	2	4	1	2	3	3	4	2	4	4	3	1	5	5	3	1
1424	0	11	0	Xishuangbanna	Changle	5	4	4	3	4	5	3	4	3	5	4	3	4	3	5	3	3	4	4	3	2	3	3.25	2	5	2	3	2	4	2	5	1	2	3	2	2	3	3	2	4	4	4	5
1425	0	11	0	Xishuangbanna	Zhongxin	4.25	3	4	4	4	5	5	5	5	3	4	4	5	3	4	2	4	4	5	3	2	2	3	2	3	2	3	4	2	1	4	5	2	2	1	1	1	1	1	2	2	5	3
1426	1	11	0	Xishuangbanna	Zhongxin	4	5	5	5	5	4	5	4	4	3	4	4	5	2.25	2	2	2	4	3	3	2	2	2	2	2	2	3	4	2	3	2	3	2	3	2	2	2	2	2	3	4	3	2
1427	1	11	0	Kunming	Zhugou	4	2	5	4	5	4	4	5	4	3	4	4	4	4	5	4	3	4	4	2	3	4	4	2.5	1	3	3	3	2	2	1	3	2	3	1	2.5	3	1	2	3	4	3	3
1428	0	11	1	Kunming	Lianhua	4	4	4	4	4	3	3	3	3	2	2	3	4	3	4	2	4	4	3	4	3	4	4	3	2	2	3	1	3	1	4	2	2	3	1	3	2	3.25	3.5	3	4	3	4
1429	1	11	1	Kunming	Wuhua	5	5	5	5	5	4	4	5	5	5	4	3	5	4	5	5	4	4	5	3	4	5	4	3	4	3	3	4	3	2	1	3	3	5	3	3	3	3	3	4	4	5	5
1430	1	11	0	Hangzhou	Nanshan	5	5	5	3	5	4	5	5	4	4	5	5	4	3	3	3	5	4	4	5	1	2	2	4	2	2.25	3	4	5	1	3	5	5	5	5	2	2	3	3	4	3	4	5
1431	0	11	1	Hangzhou	Shengli	5	5	5	4	4	4	4	4	4	4	5	4	5	4	4	4	5	4	4	5	4	4	5	4	1	2	3	4	4	1	4	5	1	2	3	5	5	5	5	4	4	3	3
1432	1	11	1	Hangzhou	Fenghuang	4	5	5	2	5	4	5	5	4	3	3	5	3	3	2	4	4	4	2	3	1	2	1	4	1	1	3	3	3	2	3	4	1	1	2	3	2	3	2	3	3	2	2
1433	0	11	1	Kunming	Lianhua	5	5	5	5	5	5	4	3	3	3	3	5	5	4	3	2	4	4	4	3	3	3	4	4	1	1	3	3	4	2	1	2	2	2	2	5	4	4	4	2	4	4	3
1434	0	11	1	Kunming	Lianhua	4	5	5	4	5	4	5	5	5	4	4	4	4	3	3	3	4	4	3	4	3	4	4	4	2	1	3	3	5	4	3	4	3	2	4	3	3	3	3	4	4	2	2
1435	0	11	0	Xishuangbanna	Changle	5	4	5	5	5	5	4	5	5	4	5	5	5	5	4	5	5	4	5	4	4	4	5	4	4	4	3	4	2	2	4	4	3	4	4	4	5	5	5	3	4	4	4
1436	1	11	1	Xishuangbanna	Shiji	5	4	5	4	5	5	5	5	5	5	5	5	5	3	4	3	3	4	4	5	4	4	3	4	3	3	3	3	2	2	1	3	2	3	2	2	3	2	2	3	2	2	3
1437	0	11	1	Hangzhou	Cuiyuan	5	5	5	5	4	5	5	5	5	5	5	5	5	4	3	4	3	4	5	4	2	3	4	5	1	5	3	5	4	4	3	4	4	4	4	5	5	5	5	3	5	4	5
1438	0	11	0	Kunming	Erjie	4	5	4	4	5	5	5	4	5	4	5	4	4	4	5	4	5	4	4	5	4	5	4	5	5	4	3	4	3	1	2	3	2	3	2	3	2	2	2	3	4	3	5
1439	1	11	0	Xishuangbanna	Changle	5	5	5	5	5	3	4	4	3	5	5	5	5	5	4	4	4	4	4	5	4	5	4	5	5	5	3	4	5	3	2	4	2	4	1	2	3	4	4	4	3	4	1
1440	0	11	1	Xishuangbanna	Yixiao	5	5	5	5	5	5	5	5	5	5	5	5	5	4	5	5	3	4	5	5	4	3	5	5	4	4	3	4	3	5	1	4	5	4	5	4	5	5	5	4	5	5	5
1441	1	11	1	Xishuangbanna	Shiji	4	4	5	5	5	5	5	4	3	4	4	4	5	4	4	3	4	4	5	4	4	4	5	5	2	5	3	4	2	2	2	5	4	2	5	4	3.75	2	2	3	2	3	4
1442	1	11	1	Xishuangbanna	Shiji	5	5	5	5	5	5	5	5	5	5	4	4	5	4	5	5	5	4	5	4	5	5	5	5	5	4	3	5	5	3	3	5	4	3	5	5	5	4	3.5	4	5	5	5
1443	1	11	0	Kunming	Zhugou	5	5	5	5	5	5	3	4	1	3	3	1	5	3	4	5	4	5	5	5	1	3	5	1	1	5	3	2	5	5	4	2	1	3	1	5	1	1	5	1	3.25	1	1
1444	0	11	1	Kunming	Wuhua	5	5	5	5	5	5	4	4	5	4	5	2	5	5	5	5	3	5	5	2	1	5	5	1	1	5	3	5	5	1	2	4	2	3	1	5	5	5	5	5	5	5	5
1445	0	11	0	Xishuangbanna	Erxiao	5	5	5	5	5	5	5	5	5	4	5	5	5	1	4	1	1	5	2	1	3	3	2	1	1	1	3	2	1	1	1	4	2	3	4	1	1	1	1	3	4	1	4
1446	1	11	0	Xishuangbanna	Erxiao	5	4	4	5	5	5	3	5	3	4	5	5	5	2	4	2	3	5	3	3	1	5	5	1	1	1	3	1	2	3	2	5	1	3	2	1	1	1	1	3	3	2	1
1447	0	11	1	Xishuangbanna	Shiji	5	5	5	5	5	5	5	5	5	5	5	5	5	3	5	5	5	5	2	5	1	2	1	1	1	1	3	3	5	2	3	5	2	2	5	5	5	5	5	5	5	5	5
1448	0	11	1	Xishuangbanna	Shiji	3	5	4	3	3	3	5	3	3	3	4	4	3	2	4	1	3	5	3	1	1	2	1	1	1	1	3	2	1	1	3	5	5	1	2	3	1	1	1	1	1	1	2
1449	1	11	1	Xishuangbanna	Shiji	3	5	4	5	3	5	2	1	3	2	5	5	2	3	4	4	3	5	4	3	1	2	2	1	1	1	3	2	1	1	2	4	4	2	1	2	2	2	1	3	4	2	5
1450	1	11	0	Hangzhou	Lijia	5	3	5	4	3	4	4	2	1	5	5	5	5	4	3	4	2	5	3	3	4	2	3	1.75	5	2	3	3	4	2.75	2	3	5	2	3	4	5	3	5	4	2	4	5
1451	0	11	0	Hangzhou	Lijia	4	5	5	5	5	4	3	4	5	4	3	4	4	2	3	3	4	5	3	2	2	3	2	2	2	2	3	2	4	1	2	2	1	3	1	4	4	2	2	5	3	4	3
1452	0	11	1	Hangzhou	Cuiyuan	5	5	5	3	5	4	4	3	4	3	5	3	3	3	4	5	5	5	5	3	1	1	4	2	1	1	3	5	4	4	3	2	1	4	5	3	3	4	4	4	4	2	3
1453	0	11	1	Kunming	Lianhua	3	5	4	3	3	3	3	4	4	1	2	3	5	1	3	3	1	5	2	2	1	1	1	2	1	1	3	4	4	3	4	2	5	1	1	5	5	5	5	4	2	1	1
1454	0	11	0	Xishuangbanna	Erxiao	4	5	5	4	4	4	5	4	5	5	4	3	4	3	5	4	5	5	4	3	3	3	5	2	5	5	3	5	4	1	2	4	5	3	2	4	4	4	3	5	5	5	4
1455	1	11	0	Xishuangbanna	Erxiao	4	5	5	5	5	4	3	4	4	3	4	5	4	3	4	3	4	5	3	4	2	3	4	2	4	2	3	4	2	1	2	3	2	3	3	2	1	2	1	4	4	4	3
1456	1	11	1	Xishuangbanna	Yixiao	5	5	5	5	5	5	5	5	5	5	5	5	5	3	4	3	4	5	5	3	3	5	5	2	3	3	3	5	5	3.25	2	5	5	5	5	5	5	5	5	5	5	5	5
1457	0	11	0	Xishuangbanna	Changle	4	2	5	4	3	3	3	5	4	3	4	2	3	3	4	3	3	5	4	2	3	2	1	2.75	3	2	3	4	2	2	4	4	1.5	1	1	2	2	3	1	3	4	3	1
1458	0	11	0	Hangzhou	Lijia	2	4	4	4	3	5	2	4	3	4	3	2	2	3	4	2	3	5	4	3	2	4	2	3	2	4	3	1	3	2	1	2	4	3	2	3	1.5	4	2	4	2	2	2
1459	0	11	1	Hangzhou	Shengli	5	5	5	5	5	5	3	4	3	2	4	4	5	3	5	2	5	5	5	2	1	3	3	3	3	2	3	2	2	1	2.75	3	1	4	1	4	4	2	2	3	3	3	3
1460	1	11	1	Hangzhou	Shengli	4	4	4	3	3	3	4	4	4	3	4	1	3	3	5	2	5	5	4	1	1	2	1	3	1	1	3	3	4	2	3	3	2	4	2	2	2	2	2	3	4	1	2
1461	1	11	1	Hangzhou	Fenghuang	5	5	5	5	5	5	5	5	5	5	5	5	5	3	5	3	5	5	2	2	5	5	5	3	1	1	3	5	4	3	2	3	2	4	2	2	3	2	2	5	5	2	5
1462	0	11	0	Kunming	Zhugou	5	4	5	4	5	5	4	5	4	5	4	4	5	4	4	5	4	5	4	3	3	4	5	3	3	4	3	3	4	2	5	4	1	3	1	5	5	4	4	3	4	2	3
1463	1	11	0	Kunming	Erjie	4	5	4	4	5	5	3	4	3	4	3	3	3	4	4	3	5	5	4	3	2	3	2	3	1	1	3	3	2	1	3	3	1	3	3	4	4	4	4	4	4	3	4
1464	1	11	0	Kunming	Zhugou	5	5	5	5	5	5	4	4	4	3	3	4	5	3	4	3	4.25	5	5	4	2	2	1.75	3	1	1	3	2	3	5	2	3	4	3	2	2	2.25	2	2	3	4	2	1
1465	0	11	1	Kunming	Wuhua	5	5	5	4	5	5	5	5	5	5	5	4	5	5	5	5	5	5	5	5	5	5	5	3	4	4	3	5	5	2	3	4	2	5	3	5	5	5	5	4	5	4	5
1466	0	11	1	Kunming	Yunda	4	5	5	5	5	5	5	5	5	5	5	4	5	3	4	3	4	5	4	4	3	3	4	3	4	3	3	4	4	1	1	3	1	2	2	4	4	4	4	4	4	4	4
1467	1	11	1	Kunming	Wuhua	5	5	5	5	5	5	5	5	5	5	5	5	5	3	4	3	4	5	4	5	3	5	5	3	2.25	1	3	3	5	2	1	3	1.75	4	2	3	3.25	4	3	4	3	4	2
1468	1	11	1	Kunming	Wuhua	5	5	5	4.75	5	5	5	5	5	5	5	3	4	4	5	3	5	5	4	2	3	5	5	3	2	3	3	5	4	1	3	5	1	4	5	4	5	5	3	3	5	4	5
1469	0	11	0	Xishuangbanna	Zhongxin	5	4	5	3	5	4	5	4	5	3	5	3	5	4	5	3	4	5	5	3	2	4	4	3	2	3	3	4	2	1	3	5	2	2	5	1	2	2	2	3	5	5	4
1470	0	11	0	Xishuangbanna	Erxiao	5	4	5	5	5	4	4	4	4	4	5	5	4	3	5	2	5	5	5	5	3	5	5	3	1	2	3	3	2	1	4	3	5	3	2	3	3	3	1	3	2	5	5
1471	0	11	1	Xishuangbanna	Shiji	4	5	5	4	4	4	4	5	5	4	5	3	5	3	4	3	3	5	4	3	2	3	2	3	1	1	3	4	1	4	2	5	2	1	4	3	2	3	2	4	2	1	5
1472	0	11	1	Xishuangbanna	Shiji	5	5	5	5	5	5	5	3	4	4	3	4	5	4	4	4	5	5	5	4	3	4	4	3	5	4	3	4	4	4	3	3	1	5	3	2	4	3	3	4	4	4	4
1473	0	11	1	Xishuangbanna	Yixiao	5	5	4	4	5	4	5	4	5	5	5	4	5	3	4	3	5	5	5	5	3	4	5	3	2	2	3	5	5	1	1	5	2	5	2	5	5	5	5	5	4	3	5
1474	1	11	1	Xishuangbanna	Shiji	3	5	5	5	4	4	4	5	5	3	4	4	4	3	4	3	4	5	3	3	3	2	3	3	2	2	3	3	3	4	4	4	3	5	4	3	3	3	2	3	4	4	4
1475	1	11	1	Xishuangbanna	Yixiao	5	3	5	5	5	5	4	5	5	5	5	3	5	3	4	5	5	5	5	4	3	5	4	3	4	4	3	4.25	2	1	4	4	1	5	5	4	5	3	4	2	5	2	5
1476	0	11	1	Hangzhou	Fenghuang	5	5	4	5	5	5	3	5	2	3	4	4	5	3	4	3	3	5	5	2	2	2	1	3.25	1	1	3	2	3	1	4	4	1	3	1	3	3	3	3	3	2	2	3
1477	1	11	0	Kunming	Erjie	4	4	4	5	5	5	5	5	5	5	4	5	5	4	5	4	4	5	4	5	4	3	4	3.5	4	4	3	4	4	4	3	2	3	4	2	2	4	2	2	2	3	4	4
1478	1	11	0	Hangzhou	Lijia	4	5	4	5	5	5	4	4	4	4	3	4	5	5	5	3	5	5	5	4	2	5	2	4	3	5	3	5	2	1	2	4	1	4	1	1	1	1	1	5	5	5	5
1479	0	11	0	Kunming	Erjie	4	3	4	4	5	4	5	5	5	5	5	5	3	5	5	3	5	5	4	4	2	3	3	4	5	5	3	4	3	2	3	5	5	5	5	2	2	2	2	4	4	5	5
1480	1	11	0	Kunming	Zhugou	5	5	5	5	5	5	5	5	5	5	5	5	5	4	4	5	5	5	4	4	3	5	5	4	3	4	3	4	5	1	4	2.75	3	4	2	5	4	4	4	5	5	5	5
1481	0	11	1	Kunming	Lianhua	4	5	5	5	5	5	5	5	5	5	4	5	4	3	3	2	2	5	3	4	4	4	4	4	1	1	3	4	5	2	3	4	1	3	1	4	3	3	2	2.75	4	5	4
1482	0	11	1	Kunming	Yunda	4	5	5	5	5	4	5	5	5	3	5	3	2	4	5	4	5	5	5	3	2	4	5	4	2	2	3	5	5	1	3	4	3	5	2	5	5	3	5	5	5	5	5
1483	1	11	1	Kunming	Wuhua	5	5	5	5	5	5	5	5	5	5	5	5	5	4	5	3	3.5	5	5	3.25	4	4	5	4	3	4	3	5	5	1.25	2	4	5	4	3	5	4	4	5	4	4	3	5
1484	1	11	0	Xishuangbanna	Zhongxin	4	5	4	4	4	4	5	5	4	5	5	3	5	4	4	5	4	5	4	4	3	4	5	4	2	3	3	4	2	2	1	4	2	4	4	4	2	2	1	4	3	5	4
1485	1	11	0	Xishuangbanna	Zhongxin	5	5	5	4	5	5	5	4	4	5	5	5	5	5	4	3	4	5	5	4	4	5	4	4	1	4	3	4	2	1	2	4	5	4	3	2	4	3	2	3	5	4	3
1486	1	11	0	Xishuangbanna	Erxiao	4	4	5	5	5	5	4	5	5	5	4	4	5	3	4	5	3	5	5	4	4	3	3	4	2	2	3	3	2	2	5	3	3	3	4	3	3	3	4	4	4	4	4
1487	0	11	1	Xishuangbanna	Shiji	5	5	5	5	5	5	5	5	5	5	5	5	5	4	5	5	5	5	5	4	4	4	5	4	3	3	3	3.5	2.75	2	4	4	1	3	3	5	5	5	5	4	5	3	5
1488	1	11	1	Xishuangbanna	Yixiao	5	5	5	3	5	5	4	4	5	3	4	1	5	3	4	2	4	5	5	5	3	3	4	4	2	3	3	3	4	1	4	5	2	4	4	5	5	4	5	5	3	5	3
1489	1	11	1	Xishuangbanna	Yixiao	4	4	5	3	5	5	5	4	3	4	3	5	5	5	5	5	5	5	5	5	3	3	5	4	3	3	3	2	3	3	3	4	5	4	2	3	3	3	3	4	5	3	4
1490	1	11	1	Xishuangbanna	Yixiao	5	5	5	5	5	5	5	5	5	5	5	5	5	4	5	5	5	5	5	4	3	5	5	4	1	1	3	4	5	2	3	5	2	4	3	5	5	5	5	4	5	5	3
1491	1	11	0	Hangzhou	Nanshan	5	5	5	5	5	5	5	5	5	5	4.75	5	5	5	5	5	5	5	5	4	3	5	3	5	5	5	3	5	5	1	2	5	3	5	1	5	5	5	5	5	5	5	5
1492	1	11	1	Hangzhou	Cuiyuan	5	5	5	5	5	5	5	5	5	5	2	3	5	5	5	5	5	5	5	2	5	5	3	5	5	5	3	5	5	2	3	3	3	3	3	5	5	5	5	5	5	5	5
1493	1	11	1	Kunming	Lianhua	3	5	5	5	4	3	5	4	3	5	5	4	5	5	5	5	5	5	5	5	5	5	5	5	4	5	3	3	5	1	3	2	1	3	1	5	5	5	5	5	3	4	5
1494	0	11	1	Xishuangbanna	Shiji	5	5	5	5	5	5	5	5	5	5	4	5	4	4	5	4	5	5	5	3	3	4	5	5	5	5	3	5	2	2	2	5	1	4	3	5	4	4	5	4	4	4	5
1495	0	11	1	Xishuangbanna	Yixiao	5	3	5	5	5	5	4	5	5	4	3	4	5	3	4	3	5	5	5	3	3	4	3	5	3	4	3	2	1	2	1	4	2	2	1	5	5	5	5	3	4	5	5
1496	0	11	1	Xishuangbanna	Yixiao	5	5	5	5	5	5	5	5	5	5	5	5	5	4	5	5	5	5	5	5	4	5	5	5	5	5	3	5	4	2.25	4	5	3	5	3	5	5	5	4	4	4	5	5
1497	0	11	0	Xishuangbanna	Changle	2	4	5	4	5	4	3	4	5	4	2	3	5	3	2	1	2	1	2	1	2.75	1	1	3	4	2	3.25	4	1	2	2	2	3	2	3	2	4	1	3	2	3	1	1
1498	1	11	0	Xishuangbanna	Changle	3	5	1	2	5	5	5	1	3	3	1	4	3	4	3	3	4	1	4	1	2	5	2	5	5	3	4	4	4	4	1	1	1	1	1	2	4	3	4	2	3	4	1
1499	0	11	0	Xishuangbanna	Erxiao	5	5	5	4	4	3	5	4	4	2	5	4	4	3	2	2	2	2	2	1	1	2	1	1	1	2	4	1	1	4	4	4	4	1	3	2	2	2	2	2	2	2	2
1500	1	11	1	Xishuangbanna	Shiji	5	4	5	5	5	5	5	5	5	5	5	5	5	3	5	4	5	2	4	3	3	4	3	2	3	3	4	3	3	3	2	4	4	4	4	5	5	3	3	3	4	4	4
1501	1	11	0	Kunming	Erjie	3	4	4	2	4	4	4	4	4	3	4	4	4	3	4	4	4	2	2	2	2.25	3	1	2.75	1	1	4	2	4	2	2	3	3	2	1	3	1	2	1	3	2	3	4
1502	1	11	0	Xishuangbanna	Erxiao	4	1	5	4	5	5	4	4	5	3	4	3	5	4	5	3	5	2	5	2.5	3	2	5	4	3	4	4	4	2	2	2	5	4	4	2	5	5	3	3	3	4	3	5
1503	0	11	0	Xishuangbanna	Erxiao	5	4	5	4	4	4	4	5	5	4	5	4	3	2	3	2	2	3	3	1	2	1	1	1	1	1	4	3	4	2	1	5	4	2	4	2	2	2	4	3	4	2	2
1504	1	11	0	Hangzhou	Lijia	4	5	4.25	4	3	4	4	3	2	2	2	4	3	3	3	4	3	3	2	3	2	3	2	2	1	1	4	2	5	5	1	1	5	1	1	2	2	2	2	3	2	2	4
1505	0	11	0	Xishuangbanna	Zhongxin	4	5	5	4	2	4	5	5	5	4	3	4	5	3	4	4	4	3	5	5	1	3	5	2	3	4	4	5	5	4	1	4	5	3	5	5	2	4	3	3	4	5	3
1506	0	11	1	Hangzhou	Shengli	4	5	5	5	5	4	5	5	4	5	5	4	5	3	3	4	4	3	3	4	4	5	5	3	1	1	4	2	3	1	2	4	2	3	2	3	3	2	2	3	4	5	3
1507	0	11	0	Xishuangbanna	Zhongxin	4	5	5	4	5	4	5	3	3	4	4	4	4	3	4	3	4	3	3	4	3	4	4	3	3	4	4	4	3	1	1	4	3	2	3	2	3	3	1	3	2	3	3
1508	1	11	0	Xishuangbanna	Changle	3	4	5	3	4	3	2	3	2	3	1	5	4	1	3	2	2	3	5	1	2	3	4	3	3	2	4	2	2	3	1	2	3	2	2	5	2	4	3	4	2	4	3
1509	1	11	0	Xishuangbanna	Erxiao	4	4	5	3	5	5	3	5	4	5	4	3	5	3	4	3	4	3	5	5	4	5	3	3	3	4	4	3	3	2	2	3	2	3	4	1	1	1	1	2	1	2	2
1510	1	11	1	Kunming	Wuhua	4	5	5	4	5	4	4	5	4	4	5	3	5	4	4	4	5	3	3	3	2	3	4	4	3	3	4	4	4	1	1	5	2	3	1	3	3	3	3	4	3.75	4	3
1511	0	11	0	Kunming	Erjie	4	5	5	4	5	5	4	4	2	3	5	5	5	3	5	2	4	4	2	5	2	4	2	1	1	1	4	4	2	1	1	4	1	4	3	2	4	2.75	2	3	1	4	3
1512	0	11	0	Xishuangbanna	Zhongxin	5	5	5	3	5	5	5	5	4	3	3	4	4	1	3	2	1	4	3	1	1	2	3	1	1	1	4	1	1	4	1	4	3	1	5	1	5	1	1	2	3.5	4.25	2
1513	1	11	0	Xishuangbanna	Changle	3	4	4	4	5	5	5	3	4	5	2	4	5	5	4	5	4	4	5	3	5	4	2	1	3	5	4	5	2	2	2	3	4	5	1	1	5	5	5	2	3	4	5
1514	1	11	0	Xishuangbanna	Erxiao	5	4	5	3	4	4	3	4	4	4	4	3	3	3	4	3	2	4	3	2	1	2	2	1	2	1	4	2	3	3	3	1	1	1	1	1	1	1	1	2	3	2	2
1515	1	11	0	Hangzhou	Nanshan	5	4	5	4	5	3	4	5	4	3	5	5	4	3	3	3	4	4	4	4	2	2	3	2	1	1	4	3	4.25	3	3	4	4	4	3	4	4	4	5	5	5	5	5
1516	0	11	1	Hangzhou	Fenghuang	4	5	5	5	5	3	5	5	5	5	5	5	5	3	2	2	4	4	4	3	3	1	4	2	1	1	4	4	5	1	3	5	1	5	2	5	5	5	5	5	5	2	5
1517	0	11	0	Xishuangbanna	Changle	4	3	4	4	3	4	4	4	3	4	4	4	4	2	4	2	4	4	3	3	3	3	2	2	1	1	4	2	3	2	3	3	2	4	3	3	2	2	2	3	3	3	2
1518	1	11	0	Xishuangbanna	Zhongxin	5	5	4	3	4	4	5	3	3	4	4	4	4	2	4	3	4	4	3	2	2	2	3	2	3	3	4	3	2	3	1	4	3	2	3	3	3	3	2	2	3	3	2
1519	1	11	1	Xishuangbanna	Shiji	5	5	5	5	5	5	4	5	5	3	5	4	4	2	5	4	3	4	4	4	2	4	4	2	1	2	4	3	1	1	1	5	1	4	2	4	3	2	1	3	4	4	4
1520	0	11	1	Xishuangbanna	Shiji	5	5	5	4	5	4	5	5	5	5	4	5	4	5	5	5	4	4	5	4	3	4	5	2.5	4	4	4	4	4	3	2	4	3	3	4	5	5	5	5	4	3	3	2
1521	0	11	0	Hangzhou	Lijia	4	4	4	3	4	4	4	4	4	4	4	3	4	3	5	4	4	4	4	4	4	4	3	3	3	4	4	3	2	2	2	2	2	3	3	2	2	2	2	4	4	3	2
1522	1	11	0	Xishuangbanna	Changle	4	4	4	3	4	3	3	3	3	4	4	4	4	3	4	3	4	4	3	3	3	3	3	3	2	2	4	2	1	4	2	4	3	3	3	3	3	3	3	4	3	4	3
1523	0	11	0	Xishuangbanna	Changle	5	5	4	5	5	4	3.75	5	4	3.75	5	5	4	4	5	5	4.25	4	4	5	4	5	4	4	5	4	4	5	5	5	3	5	4	4	5	4	5	5	4	5	4	4	5
1524	0	11	0	Xishuangbanna	Zhongxin	5	4	5	4	5	4	5	5	4	4	5	4	4	3	5	4	3.25	4	5	5	5	4	4	4	5	4	4	5	3	4	5	4	3	4	5	4	5	3	4	4	5	5	4
1525	0	11	1	Xishuangbanna	Shiji	4	5	5	5	5	4	3	2	3	4	3	5	5	3	5	2	4	4	5	5	1	5	5	4	1	3	4	5	2	1	1	3	5	5	2	3	2	2	3	5	5	4	5
1526	0	11	1	Xishuangbanna	Yixiao	5	4	5	3	5	4	4	4	4	3	5	5	5	5	4	4	4	4	4	4	4	4	4	4	4	4	4	4	4	4	2	4	3	3	2	4	3	3	4	4	4	4.5	4
1527	1	11	1	Xishuangbanna	Yixiao	5	5	5	5	5	5	5	4	4	5	5	5	4	3	4	4	4	4	5	3	3	5	5	4	3	3	4	5	5	3	2	5	3	5	3	5	5	5	5	5	5	5	5
1528	0	11	1	Kunming	Wuhua	5	5	5	5	5	5	5	5	5	5	5	5	5	3	5	4	5	4	5	5	4	4	5	5	1	5	4	5	5	1	2	5	1	5	2	5	5	5	5	5	5	5	5
1529	1	11	1	Kunming	Yunda	4	5	4	4	4	5	5	5	4	5	5	2	5	3	3	2	3	4	5	5	4	4	5	5	5	5	4	4	3	3	1	4	3	4	4	5	4	5	4	4	4	5	5
1530	0	11	1	Xishuangbanna	Shiji	4	5	5	5	5	4.75	5	5	4	3	3	5	5	4	5	4	4	4	4	5	5	5	5	5	4	4	4	5	3	3	1	2	2	5	3	3	3	3	4	3	3	4	5
1531	0	11	1	Hangzhou	Shengli	5	3	5	3	3	3	5	5	5	5	3	4	3	2	2	2	2	5	3	2	1	5	1	1	1	1	4	2	4	2	1	3	1	5	1	3	2	2	2	2	2	2	2
1532	0	11	0	Xishuangbanna	Changle	5	3	5	5	2	3	2	5	5	4	5	1	5	4	4	3	3	5	1	2	1	2	2	1	2	1	4	3	2	3	2	4	1	2	4	2	2	2	2	3	4	4	3
1533	0	11	0	Xishuangbanna	Erxiao	4	5	4	3	5	3	4	4	4	4	4	3	3	3	3	2	3	5	5	3	1	1	1	1	1	1	4	1	4	4	3	4	4	1	4	4	1	4	4	1	1	3	1
1534	0	11	1	Hangzhou	Shengli	5	5	5	4	5	4	5	5	5	5	5	3	5	4	5	2	5	5	3	2	5	2	5	2	1	1	4	5	5	1	3.5	5	1	4	1	5	5	5	5	5	5	3	4
1535	0	11	1	Hangzhou	Fenghuang	5	4	5	5	4	5	5	5	5	5	5	5	5	5	5	3	5	5	5	5	2	3	2	2	5	5	4	3	3	4	3	5	5	5	5	2	2	2	2	4	4	5	5
1536	1	11	1	Kunming	Lianhua	3	4	5	5	5	4	4	3	2	5	4	3.25	3	3	4	1.75	1	5	4	2	1	3	4	2	1	1	4	4	2	5	3	3	5	5	5	3	4	2	1	4	5	5	3
1537	0	11	1	Kunming	Yunda	5	5	5	5	5	5	5	5	5	5	4	5	5	5	5	3	5	5	5	5	5	5	5	3	1	1	4	4	3	1	3	2	1	4	1	5	5	5	5	5	5	3	3
1538	1	11	1	Kunming	Wuhua	5	5	5	5	5	5	5	5	5	5	5	3	4	3	4	2	4	5	5	2	1	4	2	3	1	3	4	3	5	1	4	3	1	3	1	5	5	5	5	5	5	2	4
1539	0	11	0	Xishuangbanna	Zhongxin	5	5	5	4	5	4	5	5	5	3	5	3	5	3	5	3	5	5	5	5	3	5	5	3	2	2	4	5	3	3	3	5	5	4	4	3	4	3	3	5	3	5	4
1540	0	11	0	Xishuangbanna	Zhongxin	5	5	4.5	5	4	5	5	4	4	5	5	3	4	2	4	4	3	5	4	2	3	2	4	3	2	3	4	3	4	3	3	3	4	2	5	2	5	3	2.75	2	5	5	5
1541	0	11	0	Xishuangbanna	Zhongxin	5	5	5	5	5	5	5	4	5	4	5	5	5	4	5	3	4	5	5	4	3	4	2	3	1	1	4	2	3	2	3	5	5	5	5	3	5	5	2	4	5	3	5
1542	1	11	0	Xishuangbanna	Erxiao	4	4	4	2	5	4	4	5	5	4	3	3	4	3	4	2	5	5	4	4	3	4	3	3	3	4	4	3	4	3	3	5	2	3.75	4	1	1	1	1	3	4	3	3
1543	0	11	1	Xishuangbanna	Shiji	4	5	5	4	5	5	5	4	5	4	3	5	5	3	3	4	3	5	4	3	3	4	2	3	3	3	4	3	5	3	4	4	3	4	4	3	3	2	3	4	2	2	2
1544	1	11	1	Xishuangbanna	Yixiao	5	5	5	5	5	5	5	5	5	5	5	5	5	4	4	3	4	5	5	3	3	5	5	3	3	3	4	4	2	1	4	3	3	4	3	3	3	3	3	5	5	5	4
1545	0	11	0	Xishuangbanna	Changle	3	4	5	5	4	3	4	3	5	4	5	5	5	3	5	3	4	5	5	4	2	4	5	4	5	4	4	5	4	5	1	2	4	3	3	5	4.25	4	3	3	3	4	5
1546	0	11	0	Xishuangbanna	Erxiao	5	5	5	5	5	5	5	5	4	4	5	5	5	4	4	4	4	5	5	5	4	5	5	4	3	3	4	5	4	3	2	5	5	5	3	4	4	3	2	4	4	5	4
1547	1	11	0	Xishuangbanna	Zhongxin	4	5	4	3	4	4	5	5	4	4	4	3	5	4	5	3	4	5	3	4	5	4	5	4	4	3	4	4	5	5	3	5	4	5	5	5	4	5	4	5	5	4	4
1548	1	11	0	Xishuangbanna	Zhongxin	3	5	4	2	3	4	5	5	3	4	4	4	3	4	5	4	4	5	5	4	2	4	3	4	1	3	4	2	4	4	4	5	3	4	4	5	5	5	4	2	5	4	3
1549	0	11	1	Xishuangbanna	Yixiao	5	4	5	4	5	4	4	4	5	5	5	5	5	5	4	5	4	5	5	5	4	5	5	4	4	4	4	3	4	3	3	4	4	5	4	3	4	4	5	5	4	4	5
1550	1	11	1	Xishuangbanna	Yixiao	5	5	5	5	5	5	4	5	5	5	5	4	5	4	4	5	4	5	4	4	4	3	4	4	4	4	4	4	4	2	2	4	4	4	4	4	4	4	4	4	3	4	5
1551	0	11	0	Hangzhou	Nanshan	5	5	5	5	5	5	5	5	5	5	5	5	5	5	5	5	5	5	5	5	5	5	5	5	1	5	4	5	5	4	3	5	5	5	5	5	5	5	5	5	5	5	5
1552	1	11	1	Hangzhou	Cuiyuan	5	5	5	5	5	5	5	5	5	5	5	5	5	5	5	5	5	5	5	5	5	5	5	5	5	5	4	4	5	5	2	5	1	5	1	5	4	4	2	5	5	2	5
1553	0	11	0	Xishuangbanna	Changle	5	4	5	5	4	5	3	5	5	5	5	4	5	4	5	4	5	5	5	5	2	5	4	5	4	4	4	5	4	4	1	5	3	4	2	4	5	5	4	5	5	4	5
1554	0	11	0	Xishuangbanna	Erxiao	4	5	5	4	5	5	4	5	5	5	4	4	4	4	4	5	5	5	5	4	5	4	5	5	5	5	4	5	4	1.25	3	4	5	5	5	5	5	4	4	5	5	5	5
1555	0	11	1	Xishuangbanna	Shiji	5	5	5	4	5	5	4	4	4	4	3	5	5	3	4	5	4	5	5	3	5	5	5	5	3	4	4	3	3	1	5	3	3	4	4	3	3	4	3	3	3	4	3
1556	1	11	1	Kunming	Lianhua	1	1	1	1	1	1	1	1	1	1	1	1	1	1	1	1	1	1	1	1	1	1	1	1	1	1	5	1	1	2	3	1	1	1	1	5	5	5	5	5	5	1	2
1557	1	11	0	Xishuangbanna	Changle	3	4	4	1	3	3	5	1	2	2	3	5	4	1	2	1	3	2	2	3	4	2	1	1	1	1	5	1	2	1	1	1	5	2	1	5	1	1	5	2	3	1	1
1558	1	11	0	Hangzhou	Lijia	3	2	4	3	3	5	4	3	3	3	4	3	3	3	3	4	3	3	2	2	4	2	4	3	3	3	5	3	4	1	4	1	4	3	5	3	1	5	5	3	1	2	3
1559	0	11	1	Xishuangbanna	Shiji	5	5	5	4	5	5	4	4	5	3	5	4	4	3	5	4	4	3	4	5	3	4	5	3	5	5	5	5	4	2	4	5	3	5	2	5	5	5	5	4	5	3	3
1560	1	11	1	Xishuangbanna	Shiji	3	4	4	4	5	5	4	3	3	3	5	4	5	2	3	2	2	4	2	1	1	2	1	1	1	1	5	1	5	1	3	5	1	2	5	5	5	1	1	2	1	1	1
1561	0	11	0	Xishuangbanna	Changle	4	2	5	4	4	4.5	4	3	4	3	3	3	3	4	4.75	5	3	4	5	2	4	4.25	4	2	3	4	5	3	2	3	1	3	5	4	4	5	3	4	5	3	4	4	4
1562	0	11	0	Xishuangbanna	Erxiao	5	5	5	5	5	5	4	5	5	4	5	4	4	3	4	4	5	4	4	4	3	5	5	3	3	4	5	5	4	3	3	5	4	5	4	3	3	3	3	3	4	5	5
1563	1	11	1	Xishuangbanna	Shiji	5	5	5	5	4	5	5	5	5	5	5	4	4	3	4	3	3	4	5	3	4	5	4	3	3	3	5	5	2	1	4	5	2	4	3	5	5	5	5	3	4	4	3
1564	1	11	1	Xishuangbanna	Yixiao	4	5	5	5	5	5	5	5	4	4	5	5	5	4	3	3	4	4	4	5	5	5	4	3	3	4	5	5	3	1	2	5	2	4	4	5	5	3	3	3	5	5	4
1565	1	11	1	Hangzhou	Shengli	3	5	5	5	5	5	5	5	5	5	3	5	3	4	4	4	4	4	4	4	4	4	4	4	1	1	5	5	5	2	2	5	2	5	1	5	5	5	5	5	3	3	3
1566	0	11	1	Hangzhou	Shengli	5	5	5	5	5	5	5	4	5	4	5	4	5	4	4	4	4	4	5	3	1	5	5	5	1	1	5	5	5	5	4	5	5	1	1	5	5	4	5	5	5	1	5
1567	1	11	1	Hangzhou	Fenghuang	5	5	5	2	2	2	5	4	4	2	2	2	2	5	4	4	4	4	5	1	5	1	5	5	1	1	5	2	3	2	4	3	3	3	3	5	2	2	1	4	3	2	1
1568	0	11	0	Xishuangbanna	Erxiao	5	5	5	5	5	5	5	5	5	5	5	5	5	4	5	5	5	4	5	5	5	5	4	5	2	2	5	5	3	5	5	5	5	5	5	5	5	5	5	4	5	5	5
1569	1	11	0	Xishuangbanna	Zhongxin	4	5	4	5	5	5	5	4	5	4	3	4	4	3	4	5	3	4	3	5	1	5	4	5	1	5	5	3	4	5	4	5	1	3	3	5	4	3	4	5	1	1	1
1570	1	11	0	Xishuangbanna	Zhongxin	5	5	5	5	4	4	5	3	5	4	5	4	5	5	5	2	5	4	4	5	3	4	5	5	4	5	5	4	4	5	3	5	3	5	4	4	5	3	5	2	5	5	4
1571	1	11	0	Hangzhou	Lijia	5	1	5	5	5	5	5	5	5	4	1	5	5	3	2	1	1	5	1	1	1	1	1	1	1	1	5	3	2	1	4	1	1	1	1	1	1	1	1	1	1	1	1
1572	1	11	1	Hangzhou	Shengli	4	5	5	4	5	3	4	3	4	4	3	5	4	3	4	3	3	5	3	5	2	2	1	1	1	2	5	1	3	1	5	2	4	3	1	4	3	4	4	2	2	1	1
1573	1	11	1	Kunming	Wuhua	4	5	5	5	5	5	3	3	5	5	4	4	5	3	4	2	3	5	3	4	2	2	2	1	1	1	5	3	4	1	1	1	1	4	2	4	3	5	5	4	5	2	1
1574	1	11	0	Xishuangbanna	Zhongxin	5	4	5	5	5	4	5	4	3	3	5	3	5	4	4	3	4	5	5	1	1	2	1	1	1	1	5	2	4	3	2	5	2	3	2	3	4	2	1	2	4	1.5	2.25
1575	0	11	0	Hangzhou	Nanshan	5	5	5	4	5	4	5	5	5	4	5	5	5	3	4	3	4	5	5	3	2	2	4	2	1	1	5	5	3	2	2	5	3	4	5	5	5	5	5	5	5	5	5
1576	1	11	1	Hangzhou	Fenghuang	3	5	4	5	5	3	4	3	4	3	4	2	4	3	4	2	3	5	3	1	1	2	2	2	1	1	5	3	5	1	4	2	1	3	1	3	2	4	2	4	4	2	1
1577	0	11	0	Kunming	Erjie	5	4	5	5	5	4	4	4	4	3	5	4	5	3	3	3	4	5	4	5	2	3	4	2	2	2	5	3	3	2	4	4	2	2	3	3	3	3	3	4	5	2	5
1578	1	11	0	Kunming	Erjie	4	3	5	2	3	4	3	4	5	4	3	2	3	3	4	4	3	5	4	4	2	4	5	2	2	4	5	4	5	2	2	5	4	3	1	1	1	1	1	5	4	5	4
1579	1	11	0	Xishuangbanna	Changle	4	4	5	3	4	4	5	5	4	4	5	4	5	3	3	3	5	5	3	3	3	4	3	2	1	1	5	4	5	3	3	4	3	4	3	2	3	2	1	3	4	2	3
1580	1	11	0	Kunming	Erjie	4	5	5	5	5	3	4	5	4	5	5	5	5	4	4	4	4	5	4	5	3	5	4	3	2	2	5	5	4	1	2	5	3	5	2	5	3	3	3	5	5	5	3
1581	1	11	1	Kunming	Lianhua	5	5	5	5	5	5	4	4	3	4	4	5	5	5	5	5	5	5	5	5	3	4	3	3	3	3	5	5	5	5	5	4	3	4	4	5	5	5	5	3	4	4	4
1582	0	11	0	Xishuangbanna	Erxiao	4	4	5	5	5	5	5	5	5	5	5	5	5	3	4	3	5	5	5	5	2	4	4	3	3	4	5	5	3	4	4	5	5	4	2	3	3	4	2	4	3	4	4
1583	1	11	0	Xishuangbanna	Erxiao	5	5	5	5	4	5	5	5	5	5	5	4	4	3	4	3	4	5	3	3	3	3	4	3	2	3	5	4	4	5	4	5	3	4	2	3	4	3	4	3	2	4	3
1584	1	11	1	Xishuangbanna	Yixiao	5	4	5	4	5	5	5	5	5	5	4	5	5	5	4	5	5	5	5	5	4	3	5	3	4	5	5	5	4	3	3	3	3	4	5	5	5	4	4	5	5	4	4
1585	1	11	1	Hangzhou	Shengli	5	5	5	5	5	5	5	5	4	5	5	1	4	3	4	2	2	5	2	3	1	1	3	3.25	1	1	5	5	4	1	3	5	1	3	1	3	3	5	5	5	5	5	5
1586	0	11	0	Hangzhou	Lijia	5	5	5	5	5	5	5	5	5	5	5	5	5	4	5	5	5	5	4	5	5	5	5	4	5	4	5	5	5	5	4	4	4	5	5	4	4	5	5	4	4	4	4
1587	1	11	1	Kunming	Lianhua	4	5	4	4	5	5	5	4	5	4	5	4	4	5	4	5	4	5	5	4	5	4	5	4	4	5	5	5	5	5	2	5	5	5	5	5	5	5	5	5	5	5	5
1588	0	11	1	Xishuangbanna	Shiji	5	5	5	5	5	5	4	5	5	5	5	3	5	3	5	4	4	5	5	3	2	4	2.5	4	5	2	5	5	5	5	3	5	5	5	5	5	5	5	5	5	5	5	5
1589	1	11	1	Xishuangbanna	Shiji	5	5	5	4	4	5	4	5	4	3	5	5	5	4	4	4	4	5	3	5	1	2	3	4	2	3	5	5	3	2	4	4	4	3	5	5	4	3	4	2	4	3	5
1590	1	11	1	Xishuangbanna	Yixiao	5	5	5	5	5	5	5	5	5	5	4	5	5	3	3	3	5	5	4	4	3	5	3	4	3	4	5	4	5	5	4	3	3	4	4	5	5	5	5	4	5	5	4
1591	0	11	0	Hangzhou	Lijia	5	5	5	5	5	5	5	5	5	5	5	5	5	5	4	5	5	5	5	5	5	5	5	5	5	5	5	5	3	1	2	5	1	4	2	5	5	5	5	5	3.25	3	5
1592	1	11	1	Hangzhou	Shengli	5	5	5	5	5	5	5	5	5	5	5	4	4	5	5	5	5	5	5	5	5	2.5	5	5	1	1	5	5	5	5	5	5	5	5	5	5	5	5	5	5	5	5	5
1593	0	11	0	Kunming	Erjie	5	5	5	5	5	5	4	5	4	3	5	3	5	3	4	5	4	5	5	4	3	4	3.75	5	5	3	5	5	5	5	1	5	3	5	5	5	3	3	4	3	3	5	5
1594	0	11	1	Kunming	Wuhua	5	5	5	5	5	5	5	5	4	5	5	4	5	5	5	5	5	5	5	5	5	5	4	5	4	4	5	5	4	1	3	5	1	3	1	5	5	5	5	5	5	5	5
1595	1	11	1	Kunming	Lianhua	5	5	5	1	1	5	4.25	3	5	5	1	5	3	2	5	5	3	5	4.5	4	5	5	4	5	4	5	5	4	4	4	5	4	2.75	4	2.75	4	4.75	4.5	5	1	5	2	5
1596	0	11	0	Xishuangbanna	Erxiao	4	5	4	5	4	4	4	3	4	4	4	3	5	3	4	4	4	5	3	4	4	4	5	5	3	4	5	3	3	2	4	4	2	3	1	1	1	1	2	3	3	2	3
1597	0	11	0	Xishuangbanna	Erxiao	5	3	5	5	4	5	5	5	5	5	4	4	4	4	3	5	5	5	5	3	2	5	5	5	5	4	5	4	4	4	1	5	4	5	5	4	4	4	5	5	4	5	4
1598	1	11	0	Xishuangbanna	Erxiao	4	5	4	5	5	4	4	3	4	4	4	3	4	3	4	4	4	5	5	4	4	4	5	5	4	4	5	3	4	1	2	4	2	3	5	3	2	3	3	4	4	2	4
1599	1	11	0	Xishuangbanna	Erxiao	5	5	5	5	5	5	5	5	5	4	5	2	5	4	5	3	4	5	5	5	4	5	4	5	1	1	5	4	3	1	3	4	1	5	1	2	2	1	1	5	5	5	4
1600	0	11	1	Xishuangbanna	Shiji	5	5	5	4	5	4	5	4	5	5	5	5	5	4	5	5	4	5	4	3	4	5	4	5	4	5	5	4	3	2	3	4.25	4	2	2	5	5	3	5	2	3	4	3
1601	0	11	1	Xishuangbanna	Yixiao	5	5	5	5	5	5	5	5	5	5	5	5	5	4	3	2	5	5	5	5	2	5	5	5	3	5	5	4	1	1	4	5	5	5	5	5	5	5	5	5	5	5	5
1602	0	11	1	Xishuangbanna	Yixiao	5	5	5	3	5	4	5	5	4.25	3	3	5	4	5	5	5	5	5	5	5	5	5	5	5	5	5	5	3	5	5	4	3	3	3	5	5	5	5	5	5	5	5	5
1603	1	11	1	Xishuangbanna	Shiji	5	4	5	5	4	5	4	4	4	5	4	5	5	5	4	4	4	5	5	3	4	4	5	5	5	5	5	3	3	2	3	3	3	4	2	2	2	3	3	4	4	3	3
1604	1	11	1	Xishuangbanna	Yixiao	5	5	5	5	5	5	5	5	5	5	5	5	5	3	5	5	5	5	4	5	5	5	5	5	5	5	5	5	5	1	2	5	5	3	2	5	5	5	5	5	5	5	5
1605	1	12	1	Kunming	Lianhua	4	5	5	3	5	4	3	3	3	3	3	4	3	1	3	3	3	1	3	1	3	3	5	1	1	1	1	3	3	1	1	2	2	2	1	3	3	2	1	1	1	2	1
1606	0	12	1	Kunming	Wuhua	5	5	5	5	5	3	5	5	3	2	5	3.75	4	2	3	2	2	1	4	1	1	1	2	1	1	5	1	1	1	3	2	5	1	1	1	5	5	1	4	5	5	1	5
1607	0	12	1	Xishuangbanna	Shiji	5	5	5	5	5	5	5	5	5	5	5	5	5	5	4	5	3	1	4	1	1	4	3	1	4	4	1	3	1	1	1	2	2.5	3.25	1	4	2	2	2	2	3	4	5
1608	1	12	0	Xishuangbanna	Zhongxin	3	5	4	5	5	4	5	5	4	3	4	3	5	2	2	1	2	1	3	1	2	2	3	2	1	1	1	2	3	2	3	2	2	4	3	1	2	1	2	2	3	3	3
1609	0	12	1	Hangzhou	Fenghuang	4	5	5	3	3	5	5	5	3	4	5	5	5	3	3	3	4	2	4	2	4	2	2	1	1	1	1	2	4	2	2	5	1	4	5	3	3	3	3	4	4	2	2
1610	1	12	1	Hangzhou	Fenghuang	5	4	5	3	4	4	4	4	4	3	3	5	4	1	2	2	3	2	1	1	1	1	1	1	1	1	1	2	3	1	1	1	1	2	1	1	1	1	1	3	3	1	3
1611	0	12	1	Kunming	Lianhua	5	5	5	5	5	5	5	4	5	4	5	5	5	4	4	3	4	2	2	1	2	4	3	1	4	4	1	2	4	1	2	4	1	3	1	5	5	5	5	3	3.25	3	4
1612	1	12	1	Kunming	Yunda	5	5	5	3	3	3	4	3	2	3	1	1	3	1	2	2	1	2	3	1	1	1	1	1	1	1	1	1	3	1	3	1	1	1	1	3	2	1	4	3	3	1	1
1613	1	12	1	Kunming	Yunda	4	4	4	4	4	4	4	4	4	4	4	4	4	3	2	1	2	2	4	3	1	1	1	1	1	1	1	1	3	1	3.25	3	2	1	1	2	2	2	3.75	4.25	3	3	3
1614	1	12	0	Hangzhou	Nanshan	5	5	5	4	5	5	5	3	3	3	3	5	4	2	3	4	5	2	2	2	2	2	4	2	1	1	1	4	2	1	2	3.75	1	2	2	2	2	2	2	2	2	1	2
1615	0	12	0	Kunming	Erjie	5	5	5	5	3	5	4	4	3	5	4	4	5	3	3	5	4	2	3	1	2	3	2	2	4	4	1	4	4	1	2	4	2	2	3	4	3	3	2	2	2	3	3
1616	1	12	1	Kunming	Lianhua	5	5	5	4	3	5	4	5	5	5	3	5	4	4	3	4	5	2	5	3	5	2	5	5	5	5	1	3	1	2	3	1	3	5	1	2	2	2	2	3	3	1	2
1617	1	12	1	Kunming	Lianhua	4	5	5	5	5	3	4	3	3	4	3	3	3	2	1	1	1	3	2	2	1	2	1	1	1	1	1	2	2	1	2	1	2	2	1	3	3	3	3	2	2	2	2
1618	1	12	1	Kunming	Lianhua	5	5	4	3	4	4	4	3	3	3	3	4	4	1	3	3	4	3	2	2	1	4	1	1	1	1	1	3	4	1	3	3	1	4	1	2	2	2	2	3	1	2	3
1619	1	12	0	Xishuangbanna	Erxiao	3	5	4	3	4	2	4	4	1	1	1	4	4	2	3	2	2	3	3	1	1	2	1	1	1	1	1	1	1	2	1	2	2	1	1	1	1	1	1	1	3	1	1
1620	1	12	0	Xishuangbanna	Erxiao	4	4	5	3	4	3	3	4	3	3	3	4	3	3	4	1	2	3	3	1	1	3	2	1	1	1	1	1	1	1	1	3	1	1	1	1	1	1	1	2	2	2	1
1621	0	12	1	Xishuangbanna	Shiji	1	5	2	5	5	1	3	1	2	1	1	3	4	2	2	2	3	3	5	1	1	1	1	1	1	1	1	2	5	1	1	1	1	1	1	1	1	1	1	1	3	1	1
1622	0	12	1	Hangzhou	Shengli	5	5	5	4	4	3	4	4	5	3	5	3	5	4	4	4	3	3	4	1	2	2	4	2	1	1	1	5	3	1	3	4	2	1	1	3	4	5	5	3	2	3	2
1623	0	12	1	Hangzhou	Shengli	3	5	5	3	3	3	3	3	3	3	4	4	3	2	4	2	3	3	2	2	2	2	2	2	1	1	1	2	2	1	1	2	1	2	1	1	1	1	1	2	2	1	2
1624	1	12	1	Hangzhou	Fenghuang	5	5	5	5	5	5	5	5	5	5	5	5	5	3	3	3	3	3	3	2	3	3	3	2	3	3	1	5	1	1	1	5	1	5	1	3	3	3	3	5	5	5	5
1625	0	12	1	Kunming	Lianhua	4	5	5	5	5	5	3	3	4	4	5	3	3	3	4	2	4	3	3	3	2	4	5	2	1	1	1	2	4	1	3	3	2	5	1	2	2	2	3	3	4	2	2
1626	0	12	1	Kunming	Wuhua	3	5	5	3	5	5	5	3	3	3	3	3	3	3	2	3	3	3	1	2	1	2	1	2	1	1	1	1	4	1	2	1	3	1	1	3	3	3	3	2	2	2	2
1627	1	12	1	Kunming	Lianhua	4	5	5	5	5	5	4	5	3	3	3	5	5	4	3	5	4	3	4	2.25	2	3	4	2	1	1	1	3	4.25	3	1	3	2	3	1	4	4	4	4	5	4	3	2
1628	1	12	0	Hangzhou	Lijia	4	5	4	4	5	4	4	4	5	5	5	4	5	3	4	3	4	3	4	3	3	4	4	3	3	4	1	3	3	2	2	4	1	4	2	3	3	2	2	3	3	4	3
1629	0	12	0	Hangzhou	Nanshan	5	5	5	5	5	4	5	5	5	5	5	4	5	4	4	4	4	3	4	4	2	2	3	3	2	4	1	4	4	1	3	5	4	5	2	4	4	4	4	5	5	5	5
1630	0	12	0	Hangzhou	Nanshan	5	5	5	4	4	3	4	4	4	4	4	4	5	3	3	3	3	3	3	4	4	3	3	3	3	3	1	2	3	1	2	3	1	3	3	2	2	2	3	3	3	3	4
1631	0	12	1	Hangzhou	Shengli	4	5	5	5	5	5	4	5	4	4	3	4	5	4	5	4	4	3	4	3	1	3	5	3	1	1	1	4	3	1	2	1	1	3	1	4	4	4	4	4	4	2	5
1632	0	12	0	Xishuangbanna	Erxiao	5	4	5	4	5	4	3	5	4	3	4	4	4	3	4	3	4	3	3	3	2	3	3	3	3	3	1	3	2	1	3	4	2	2	2	2	2	2	2	3	2	3	2
1633	0	12	1	Kunming	Lianhua	5	4	4	5	4	5	3	4	4	4	5	4	3	3	4	4	2	3	4	5	4	3	4	5	5	5	1	4	5	1	2	4	2	3	1	2	4	5	5	5	5	3	4
1634	1	12	1	Kunming	Lianhua	5	5	5	5	5	5	5	5	5	5	4	5	5	5	5	5	5	3	2	5	5	5	5	5	3	5	1	5	5	1	2	2	1	1	1	5	5	5	5	5	5	5	5
1635	1	12	1	Kunming	Wuhua	5	5	5	4	5	3	4	3	3	3	1	5	2	4	3	2	4	3	3	2	5	2	5	5	1	1	1	5	5	3	2	2	5	4	1	3.25	3	2	5	5	5	5	3
1636	1	12	0	Hangzhou	Lijia	4	3	4	4	5	4	4	3	3	4	3	5	5	3	4	4	5	4	4	4	5	4	3	1	1	1	1	4	3	1	4	4	2	4	1	5	3	3	3	4	4	3	3.5
1637	0	12	1	Hangzhou	Shengli	4	5	4	4	4	3	3	4	4	3	4	4	3	3	3	3	3	4	3	3	1	2	1	1	1	1	1	3	3	1	2	2	2	2	1	3	3	3	3	3	3	2	3
1638	0	12	0	Kunming	Erjie	5	5	5	5	5	5	5	5	5	5	5	5	5	4	4	1	4	4	4	4	1	4	4	1	1	1	1	3	3	2.5	2	5	5	5	2	1	1	1	1	5	5	5	5
1639	0	12	0	Kunming	Zhugou	4	3	4	3	3	3	1	3	3	4	3	3	2	3	2	3	5	4	5	2	1	1	2	1	1	1	1	2	1	2	5	3	1	1	2	3.5	5	1	1	3	2	3	1
1640	1	12	0	Kunming	Erjie	4	5	5	5	4	5	4	4	4	3	4	5	4	3	2	2	2	4	3	2	3	3	4.5	1	1	1	1	2	2	1	4	2	3	1	1	1	1	1	1	3	3	3	2
1641	1	12	0	Xishuangbanna	Erxiao	4	2	2	3	4	2	2	4	3	2	4	3	2	1	2	2	1	4	2	1	1	1	1	1	1	1	1	1	1	1	2	1	1	1	1	1	1	1	1	1	1	1	2.25
1642	1	12	0	Xishuangbanna	Erxiao	5	4	5	4	5	5	1	5	4	5	5	4	5	2	3	4	4	4	3.25	3	1	4	1	1	2	2	1	5	1	2	4	4	5	2	1	3	4	4	1	4	5	4	2
1643	1	12	1	Xishuangbanna	Yixiao	5	5	5	5	5	5	5	5	5	2	5	5	2	4	4	4	4	4	4	4	4	4	4	1	1	1	1	5	1	1	5	1	1	1	1	1	1	1	1	5	5	5	5
1644	1	12	1	Hangzhou	Fenghuang	4	5	5	5	5	5	4	4	4	3	5	5	4	3	4	3	5	4	4	3	2	4	5	2	1	1	1	3	4	1	3	5	1	4	1	2	2	2	1	4	5	2	4
1645	0	12	0	Kunming	Erjie	5	5	5	5	5	5	4	5	5	4	5	5	5	3	4	3	4	4	3	5	3	3	3	2	2	2	1	2	3	1	1	4	3	2	1	3	2	2	2	2	2	4	4
1646	0	12	0	Kunming	Erjie	4	5	5	4	5	5	4	5	4	3	4	4	3	3	3	3	4	4	3	2	1	1	1	2	2	2	1	3	4	1	5	3	1	1	2	3	3	1	1	3	1	3	1
1647	0	12	0	Kunming	Zhugou	5	5	4	5	5	4	3	5	4	5	4	3	4	2	3	3	4	4	4	4	1	3	3	2	3	3	1	3	1	2	1.5	1	2	1	2	2	2	1	1	1	2	3	1
1648	1	12	0	Xishuangbanna	Zhongxin	4	5	5	3	4	4	5	4	4	3	3	3	3	3	3	3	4	4	2	3	3	3	2	2	1	1	1	2	4	1	2	2	2	3	1	4	3	2	3	4	4	4	5
1649	1	12	1	Xishuangbanna	Shiji	4	5	5	5	5	4	3	4	4	4	5	4	3	3	4	2	3	4	3	3	1	3	3	2	1	1	1	2	5	5	2	3	4	5	1.25	4	2.25	2	2.5	3.25	5	2	4
1650	1	12	0	Hangzhou	Nanshan	5	5	5	5	5	5	5	5	5	4	5	4	4	3	4	5	4	4	5	5	3	3	4	3	2	1	1	5	5	2	4	3	4	4	1	3	3	5	1	5	5	5	5
1651	0	12	0	Kunming	Erjie	4	4	4	5	5	5	3	3	4	4	4	5	4	3	3	3	3	4	4	3	3	4	4	3	1	1	1	3	1	1	3	3	1	1	1	1	1	1	1	3	3	3	3
1652	0	12	0	Kunming	Erjie	5	5	5	4	5	5	5	4	5	5	5	4	4	3	5	5	4	4	4	4	5	4	4	3	3	5	1	5	4	1	3	3	2	3	1	3	3	2	2.75	5	3	4	4
1653	0	12	0	Kunming	Zhugou	4	5	4	5	4	5	3	5	4	5	5	3	5	3	3	1	5	4	5	1	1	3	2	3	2	2	1	5	3	3	2	2	1	4	1	4	2.75	2	3	5	5	5	4
1654	0	12	0	Kunming	Zhugou	4	4	4	4	5	3	3	3	5	4	4	4	4	3	3	2	3	4	4	5	2	2	2	3	4	3	1	2	5	4	1	3	3	3	1	4	4	3	3	2	2	2	1
1655	0	12	1	Kunming	Lianhua	4	3	4	3	4	4	4	4	4	3	4	3	3	4	4	3	4	4	4	3	3	4	3	3	2	2	1	3	4	1	3	4	1	3	1	3	3	2	3	2	3	3	2
1656	1	12	1	Kunming	Wuhua	3	5	5	4	4	5	3	5	4	4	4	4	4	3	4	3	4	4	5	2	1	4	3	3	1	1	1	3	4	1.5	1	4	2	4	4	4	3	1	1	4	5	4	4
1657	1	12	0	Xishuangbanna	Changle	5	5	4	5	5	5	5	1	2	3	3	3	4	3	2	1	5	4	2	1	1	5	1	3	1	5	1	1	1	1	3	1	1	1	1	1	1	1	2	2	1	3	4
1658	0	12	1	Hangzhou	Shengli	5	5	5	4	4	4	5	5	5	5	3	3	3	3	4	2	4	4	5	2	1	1	3	4	1	1	1	4	5	1	1	2	1	3	1	3	3	3	3	3	3	2	5
1659	0	12	1	Hangzhou	Fenghuang	4	5	5	5	5	5	3	5	2	3.75	4	3	5	3	2	5	4	4	4	3	1	4	1	4	1	1	1	4	3	2	1	5	1	3	1	4	3	2	2	3	4	2	4
1660	1	12	0	Kunming	Erjie	4	3	5	5	5	5	2	4	4	4	3	2	5	4	3	5	3	4	5	2	3	4	3	4	2	3	1	4	4	2	2	4	3	3	2	3	3	2	5	3	5	4	5
1661	1	12	0	Kunming	Erjie	4	5	4.75	5	5	5	4	3	3	3	4	4	5	3	4	5	2	4	1	3	4	4	5	4	3	4	1	4	4	1	3	4	1	2	1	5	5	4	4	4	2.5	5	4
1662	0	12	1	Kunming	Lianhua	5	4	5	4	4	5	5	5	5	5	5	2	5	4	4	4	4	4	4	3	1	4	4	4	3	3	1	5	5	1	2	5	1	3.5	1	5	5	5	5	5	5	5	1
1663	0	12	1	Kunming	Wuhua	4	5	5	4	5	4	3	4	5	3	5	5	5	3	4	5	4	4	5	3	1	3	4	4	5	5	1	3	1	1	4	5	3	5	1	4	4	3	3	4	3	5	3
1664	0	12	1	Kunming	Wuhua	5	5	5	5	4.75	4	5	5	5	5	5	4	4	4	3	5	5	4	5	4	2	5	5	4	5	5	1	5	4	2	2	5	1	4	1	5	5	5	5	5	3	3	4
1665	0	12	1	Kunming	Yunda	5	5	5	5	5	5	5	5	5	5	5	3	4	4	4	4	4	4	5	4	3	5	5	4	1	1	1	4	5	1	4	5	2	4	2	3	3	3	3	5	5	5	5
1666	0	12	1	Kunming	Yunda	4	5	5	5	5	4	4	5	5	4	5	3	5	3	4	2	3	4	4	4	4	4	5	4	1	1	1	4	4	1	5	5	1	1	1	4	4	4	4	3	3	3	3
1667	1	12	1	Kunming	Lianhua	5	5	5	4	5	5	5	3	2	5	3	2	3	3	4	2	2	4	3	3	2	3	3.75	4	2	2	1	2	4	1	1.75	1	1	4	1	5	5	5	5	5	5	5	3
1668	1	12	1	Kunming	Lianhua	4	5	5	4	5	4	4	4	5	4	4	4	3	3	5	4	4	4	5	3	2	4	3	4	4	3	1	3	5	4	1	2	2	3	2	5	4	5	4	3	2	2	3
1669	1	12	1	Kunming	Wuhua	5	5	5	5	5	5	5	4	4	5	5	3	5	3	5	3	3.5	4	5	4	4	5	4	4	4	4	1	5	3.5	4	3	4	1	4	3	4	4	5	5	4	5	4	5
1670	0	12	1	Xishuangbanna	Shiji	5	5	5	5	5	5	5	5	5	5	3	4	5	4	4	3	4	4	5	4	3	5	5	4	3	3	1	5	2	1	3	1	1	2	1	3	3	3	3	4	4	4	4
1671	1	12	0	Hangzhou	Lijia	5	5	5	3	5	5	4	5	5	4	4	4	5	4	5	3	5	4	5	3	3	3	4	5	5	5	1	5	3	1	5	2	1	1	1	2	2	3	2	2	3	2	2
1672	1	12	1	Hangzhou	Fenghuang	5	5	5	4	5	5	5	5	5	5	5	4	4	4	5	5	4	4	5	3	3	4	4	5	2	2	1	4	3	1	5	3	1	5	1	5	5	5	5	4	5	3	5
1673	0	12	1	Kunming	Wuhua	5	5	5	5	5	5	5	5	5	5	5	5	5	4	4	5	4	4	5	4	4	5	5	5	4	4	1	5	5	2	4	4	1	2	3	5	5	4	5	4	5	3	3
1674	0	12	1	Kunming	Yunda	3	5	4	3	5	5	5	4	3	4	4	4	5	3	3	4	5	4	5	2	2	3	4	5	2	4	1	3	5	2.25	3	2	1	3	2	4	4	4	2	5	4	4	5
1675	1	12	1	Kunming	Yunda	5	5	5	4	5	4	5	4	3	3	4	5	5	5	4	5	5	4	3.75	3	3	5	3	5	4	1	1	4	3	1	4	4	1	3	5	5	5	5	5	4	4	3	3
1676	0	12	1	Kunming	Lianhua	5	5	5	5	4	5	5	5	5	5	5	3	5	3	5	3	2	4.25	5	1	2	5	5	5	3	5	1	5	5	1	4	5	1	5	1	5	5	5	5	5	5	5	3
1677	1	12	1	Kunming	Wuhua	5	5	5	5	5	5	5	5	5	5	5	4	5	4	5	4	5	4.25	5	5	3	5	5	5	4	4	1	5	4	1	1	2	1	4	2	5	5	5	5	5	5	5	5
1678	1	12	0	Hangzhou	Nanshan	5	5	5	5	5	5	5	4	4	4	3	5	5	3	4	5	5	5	5	3	1	5	3	1	5	5	1	2	5	1	5	2	1	2	1	5	5	5	5	4	3	5	3
1679	1	12	0	Hangzhou	Nanshan	5	5	5	5	5	5	3	4	4	5	5	5	5	2	4	2	2	5	4	2	1	2	1	1	1	1	1	2	3	1	3	2	1	2	1	2	1	1	1	2	4	2	4
1680	1	12	0	Hangzhou	Nanshan	5	5	5	5	5	5	5	5	3	2	1	5	5	3	5	1	5	5	5	1	1	1	1	1	5	5	1	2	1	1	2	4	1	1	1	1	1	1	3	3	1	1	5
1681	0	12	1	Hangzhou	Shengli	4	4	4	4	4	4	4	3	3	4	3	3	2	1	4	2	3	5	1	1	2	1	1	1	1	1	1	1	3	2	5	3	1	2	2	2	2	2	2	4	2	1	2
1682	0	12	0	Kunming	Erjie	5	5	5	4	5	4	4	4	4	3	3	3	4	2	4	2	2	5	4	2	1	2	4	1	1	1	1	4	4	1	3	2	1	1	1	4	3	2	4	4	2	4	4
1683	0	12	1	Kunming	Wuhua	5	5	4	3	4	3	5	5	5	5	5	3	3	2	3	2	2	5	3	2	1	2	3	1	1	1	1	2	1	2	2	3	2	2	3	3	1	1	3	3	1	1	3
1684	0	12	1	Kunming	Wuhua	5	5	5	5	5	5	5	5	5	4	5	5	5	4	4	4	4	5	4	5	4	3	2	1	1	1	1	4	4	2	2	4	2	2	2	4	3	2	2	4	2	2	4
1685	0	12	1	Kunming	Yunda	5	5	5	5	5	5	5	5	5	5	5	1	5	5	5	5	2	5	5	1	1	5	5	1	1	1	1	5	5	1	5	5	1	5	1	5	5	5	5	5	5	5	5
1686	1	12	1	Kunming	Wuhua	5	5	5	5	5	5	5	5	5	5	3	3	4	5	5	5	5	5	5	3	1.75	2	5	1	1	1	1	3	1	1	3	3	1	3	1	5	5	5	5	5	5	5	5
1687	1	12	1	Kunming	Yunda	5	5	5	4	3	3	2	5	1	1	5	1	3	3	4	1	2	5	3	1	1	2	1	1	1	1	1	1	1	1	2	1	1	1	5	1	1	1	1	1	3	1	3
1688	1	12	0	Xishuangbanna	Erxiao	2	5	5	3	4	3	4	5	4	4	3	5	2	2	2	2	2	5	2	1	1	1	3	1	2	2	1	2	3	1	3	2	3	2	1	1	2	1	1	2	1	1	1
1689	1	12	0	Hangzhou	Nanshan	4	5	4	4	4	4	4	4	3	4	5	4	4	3	4	2	5	5	4	1	1	5	3	2	1	1	1	2	5	1	3	5	1	4	1	2	1	2	2	5	4	1	3
1690	1	12	0	Hangzhou	Lijia	5	5	5	3	4	5	5	5	5	5	1	3	1	3	5	5	5	5	5	1	1	5	1	2	1	1	1	3	2	1	2	2	1	4	1	2	2	2	2	5	5	1	1
1691	1	12	0	Hangzhou	Nanshan	5	5	5	4	5	4	5	5	5	5	4	5	3	3	4	4	4	5	5	2	2	3	5	2	1	1	1	5	5	1	3	5	1	5	1	5	5	5	3	3	2	3	2
1692	0	12	1	Hangzhou	Fenghuang	4	5	5	3	5	3	3	3	2	2	3	1	3	3	4	3	5	5	3	1	1	1	2	2	1	1	1	3	4	1	4	1	1	1	1	1	2	2	1	2	4	1	2
1693	1	12	1	Hangzhou	Fenghuang	5	5	5	4	4	3	5	5	5	5	4	3	5	2	5	2	5	5	5	2	2	3	4	2	1	1	1	2	5	2	4	5	1	2	3	5	5	5	5	5	5	2	5
1694	1	12	1	Hangzhou	Shengli	3	5	5	5	5	5	4	3	3	3	5	5	5	1	2	3	3.25	5	2	5	1	1	1	2	1	1	1	1	2	1	2	2	1	2	1	5	5	5	5	3	3	1	3
1695	0	12	0	Kunming	Erjie	4	5	5	5	5	4	5	5	5	4	5	5	5	3	4	2	4	5	4	3	2	3	4	2	5	2	1	4	2	1	1	4	1	2	1	1	2	2	2	3	2	2	3
1696	0	12	0	Kunming	Zhugou	5	4	5	4	5	5	2	4	5	4	5	4	5	3	5	4	3	5	5	3	2	4	2	2	1	1	1	4	2	1	2	4	1	4	1	2	1	1	1	3	4	2	3
1697	1	12	0	Kunming	Zhugou	5	5	5	4	5	4	5	4	3	5	3	3	4.75	3	4	3	4	5	5	2	2	3	2	2	3.5	4	1	3	4	2	4	3	1	3	2	2	3	2	2	3	4	5	4.5
1698	1	12	0	Kunming	Zhugou	5	5	5	5	5	5	5	5	5	5	5	3	5	4	5	5	4	5	5	5	4	5	5	2	5	5	1	5	5	1	5	5	1	5	1	4	4	4	5	5	4	4	4
1699	1	12	0	Kunming	Zhugou	5	5	5	4.5	5	5	4	4	3	4	4	5	5	3	5	4	3	5	4	3.25	2	5	4	2	3	3	1	3	3	1	5	3	2	4	2	3	3	2	2	4	5	3	2
1700	0	12	1	Kunming	Wuhua	4	5	5	5	5	5	5	3	4	3	5	3	4	4	4	5	5	5	4	3	1	3	4	2	1	1	1	3	4	1	2	3	1	3	2	2	2	2	2	4	4	3	4
1701	0	12	1	Kunming	Wuhua	5	5	5	5	5	5	4	4	5	4	5	4	5	4	4	4	4	5	3	5	1	3	3	2	1	1	1	1	3	1	2	2	2	3	1	4	3	3	2	5	3	2	4
1702	1	12	1	Kunming	Wuhua	5	5	5	5	5	3	4	4	4	5	3	4	5	3	5	2	5	5	5	5	5	5	3	2	2	5	1	3	5	2	3	3	5	2	4	5	5	5	5	5	5	5	5
1703	1	12	1	Kunming	Yunda	5	5	5	5	5	5	5	4	4	5	3	4	5	3	4	3	4	5	4	2	1	2	2	2	2	2	1	3	3	1	5	2	2	1	1	2	2	3	3	4	3	2	2
1704	1	12	1	Kunming	Yunda	5	5	5	5	4	5	4	3	3	3	2	3	4	3	4	4	4	5	5	2	1	1	2	2	1	1	1	2	4	1	1	2	3	3	2	4	3	4	3	5	5	5	5
1705	0	12	0	Xishuangbanna	Changle	4	5	5	3	5	4	5	5	5	5	5	4	5	2	3.25	2	3	5	2	3.75	1	3	4	2	1	2.75	1	3	2	1	4	4	2	3	2	1	2	1	1	4	3	2	4
1706	1	12	0	Xishuangbanna	Zhongxin	5	5	5	5	5	5	5	5	4	1	3	1	5	4	4	3	3	5	5	4	3	4	5	2	5	3	1	5	1	5	3	4	4	3	4	4	4	3	4	2	4	5	4
1707	0	12	1	Xishuangbanna	Yixiao	3	4	3	3	4	3	4	5	3	3	4	4	4	4	5	2	4	5	3	2	3	2	3	2	1	1	1	3	3	2	3	3	1	4	1	1	1	1	1	5	5	1	5
1708	0	12	0	Kunming	Zhugou	5	5	5	5	5	5	5	5	5	5	5	5	5	4	5	5	5	5	4	5	4	5	5	2.5	5	4	1	5	5	1	2	5	5	5	5	5	5	2	5	5	5	5	5
1709	0	12	0	Hangzhou	Nanshan	5	5	5	5	5	5	4	5	5	5	5	5	4	4	4	5	5	5	5	4	3	4	5	3	1	1	1	5	5	1	3	5	4	2	2	3	3	4	3	5	4	3	4
1710	1	12	0	Hangzhou	Nanshan	5	5	5	4	4	4	3	4	4	2	3	4	4	3	3	2	5	5	4	1	1	2	3	3	1	1	1	2	3	1	2	3	3	2	2	3	3	3	3	4	3	4	2
1711	1	12	0	Hangzhou	Nanshan	5	5	5	4	5	5	5	5	5	3	3	5	4	5	5	5	5	5	5	3	2	2	2	3	2	4	1	3	3	1	1	3	1	5	1	2	2	3	3	3	3	3	3
1712	1	12	0	Hangzhou	Nanshan	5	5	5	4	5	5	5	5	4	5	5	5	5	4	5	3	5	5	3	5	4	4	4	3	1	2	1	5	5	1	2	5	2	4	1	3	2	3	2	5	5	5	4
1713	0	12	1	Hangzhou	Shengli	5	5	5	5	5	5	5	5	5	5	5	3	5	3	5	5	3	5	5	3	1	2	2	3	3	3	1	3	4	1	2	5	1	3	1	5	5	5	5	3	3	3	3
1714	1	12	1	Hangzhou	Shengli	5	5	5	5	5	5	5	5	4	5	3	5	5	4	5	3	3.25	5	4	5	5	5	2	3	1	1	1	5	5	1	4.25	5	1	5	1	5	5	5	5	5	5	1	5
1715	1	12	1	Hangzhou	Fenghuang	5	5	5	3	5	4	5	4	5	3	2	2	3	3	4	4	2	5	2	2	1	1	5	3	1	1	1	3	3	1	3	3	2	4	1	3	3	3	3	5	4	2	3
1716	0	12	0	Kunming	Erjie	5	5	5	5	5	5	5	5	5	5	5	3	5	4	5	3	4	5	3.75	3	2	3	3	3	2	2	1	4	2	1	3	2	1	2	1	2	2	2	2	4	3	4	4
1717	0	12	0	Kunming	Erjie	4	5	4	4	5	4	3	4	5	4	5	5	3	3	4	4	5	5	4	3	3	4	4	3	4	3	1	3	3	1	5	4	3	3	2	3	3	3	3	4	3	3	4
1718	0	12	0	Kunming	Erjie	4	5	5	4	4	4	1	4	4	5	4	4	5	3	3	4	5	5	1	5	4	3	3	3	2	2	1	3	3	1	3	3	2	3	2	3	3	3	3	4	4	2	5
1719	0	12	0	Kunming	Erjie	4	5	5	5	5	5	5	5	5	5	5	2	4	4	4	3	4	5	5	5	2	3	4	3	1	3	1	4	2	1	4	5	1	3	1	3	3	3	3	4	4	4	5
1720	0	12	0	Kunming	Erjie	5	5	5	5	5	5	4	4	5	5	3	5	5	4	4	4	5	5	4	3	2	5	2	3	5	2	1	3	3	1	1	2	2	3	1	3	3	3	2	3	3	2	3
1721	0	12	0	Kunming	Zhugou	5	4	3	3	5	4	4	5	3	4	4	2	4	4	3	4	5	5	2	1	2	4	2	3	1	1	1	3	4	1	3	3	1	5	1	5	3	4	3	5	2	4	5
1722	1	12	0	Kunming	Erjie	5	5	4	3	5	4	3	5	3	4	2	3	3	3	4	4	3	5	2	3	2	3.5	3	3	3	1	1	3	4	4	3	4	5	2	1	3	4	3	1	2	3	5	3
1723	1	12	0	Kunming	Zhugou	4	5	5	5	5	5	3	5	4	4	5	4	4	4	4	5	5	5	5	4	4	5	5	3	3	5	1	4	5	5	2	5	1	4	5	4	3	2	4	4	5	5	5
1724	0	12	1	Kunming	Lianhua	5	5	5	5	4	5	4	5	5	5	5	4	5	3.25	3	4	4	5	5	5	3	5	5	3	2	3	1	3	5	1	2	4	2	5	1	5	4.75	3	2	4	5	3	5
1725	0	12	1	Kunming	Wuhua	5	5	5	5	5	5	5	5	5	5	5	5	5	5	5	3	5	5	5	5	3	5	4	3	3	3	1	5	5	1	2	5	2	5	1	5	5	5	5	5	3	5	4
1726	0	12	1	Kunming	Yunda	4	5	5	5	5	5	4	5	5	3	4	4	5	3	3	3	3	5	4	3	2	2	3	3	1	1	1	4	1	1	5	4	1	3	1	4	3	3	5	3	4	2	3
1727	1	12	1	Kunming	Lianhua	4	5	5	5	4	5	4	3	4	3	5	5	4	4	3	3	3	5	5	5	3	3	5	3	3	3	1	3	3	1	4	5	3	2	1	3	3	3	3	2	5	5	3
1728	1	12	1	Kunming	Wuhua	5	5	5	5	5	5	5	5	5	4	5	3	4	2	5	3	5	5	5	3	2	4	4.5	3	1	1	1	5	4	4	4	1	3	1	1	4	4	3	3	2	3	5	4
1729	1	12	0	Xishuangbanna	Changle	5	5	5	5	5	5	5	2	4	3	2	5	5	3	4	2	5	5	5	4	5	5	3	3	2	2	1	4	5	1	4	5	1	5	1	5	4	5	4	4	5	2	4
1730	1	12	0	Xishuangbanna	Erxiao	5	4	5	5	5	3.75	5	5	5	4	5	5	5	3	4	5	3.25	5	5	5	2	5	5	3	5	5	1	4	4	2	3	5	4	2.75	4	3	3	2	2	3	4	3	5
1731	0	12	0	Xishuangbanna	Erxiao	5	5	5	4	5	3	4	5	4	3	3	5	5	3	4	2	4	5	3	5	4	4	5	3	3	4	1	4	4	4	5	5	1	4	2	2	2	2	2	4	4	4	4
1732	1	12	0	Xishuangbanna	Zhongxin	4	4	5	4	5	5	5	5	4	3	5	2	5	5	4	2	4	5	5	4	2	5	5	3	2	5	1	5	3	2	1	5	5	4	2	4	5	4	5	3	5	2	4
1733	1	12	1	Xishuangbanna	Shiji	5	5	5	5	5	5	5	5	5	4	5	4	5	4	5	3	5	5	5	3	1	3	5	3	1	4	1	4	3	1	2	5	1	5	1	4	4	4	3	4	5	5	4
1734	1	12	1	Xishuangbanna	Yixiao	5	4	5	4	4	5	5	5	5	5	3	4	5	3	4	4	4	5	4	5	3	3	5	3	3	5	1	4	4	2.25	3	4	3	3	2	3	4	4	4	3	4	2	3
1735	1	12	0	Kunming	Zhugou	4	5	5	5	5	5	2	4	4	5	3	4	4	3	4	4	5	5	5	3	2	4	4	3.25	3	3	1	3	2	3	2	4	2	5	3	4	3	2	4	5	4	5	3
1736	1	12	0	Hangzhou	Nanshan	5	5	5	4	5	5	5	4	4.5	5	5	4	5	4.25	4	3	4	5	3	3	4	3	5	3.75	2	2	1	3	5	2	2	5	2	3	1	2	2	2	3.5	3	4	3	5
1737	0	12	0	Hangzhou	Lijia	5	5	5	5	5	4	5	5	5	5	5	5	5	3	4	3	3	5	3	4	3	3	3	4	2	2	1	3	3	1	2	3	1	3	1	2	2	2	3	3	2	3	3
1738	1	12	0	Hangzhou	Nanshan	5	5	5	5	5	5	4	5	5	4	5	3	4	5	5	5	5	5	5	5	4	5	4	4	3	4	1	5	4	1	1	2	1	4	1	3	3	3	3	4	5	4	5
1739	1	12	1	Hangzhou	Shengli	5	4	3	5	4	4	2	1	2	3	4	3	5	5	4	3	4	5	3	4	3	4	5	4	4	5	1	2	3	2	4	2	1	2	3	5	4	5	4	3	4	5	4
1740	0	12	0	Kunming	Zhugou	5	5	5	4	5	4	5	5	5	5	4	3	4	4	4	3	4	5	4	3	2	3	3	4	4	4	1	3	2	2	4	1	2	2	3	3	3	4.25	3	4	4	3	4
1741	0	12	0	Kunming	Zhugou	5	5	4	5	5	1	3	3	4	5	4	4.5	5	4	5	3	4	5	5	2	4	5	4	4	4	5	1	5	5	1	1	4	1	3	1	4	4	3	5	5	4	5	4
1742	0	12	0	Kunming	Zhugou	5	5	5	5	5	5	3	5	4	5	3	2	5	5	4	4	5	5	5	4	3	4	5	4	4	3	1	5	5	1	4	3	3	4	1	4	4	3	3	3	3	4	3
1743	1	12	0	Kunming	Zhugou	4	5	4	4	4	4	4	4	3	4	4	3	4	5	5	4	5	5	5	2	3	4	3	4	5	5	1	5	1	1	2	1	1	2	1	2	5	1	2	1	2	1	2
1744	0	12	1	Kunming	Lianhua	5	5	5	5	5	5	5	5	5	4	5	2	4	5	3	5	5	5	3	5	3	4	3	4	2	2	1	4	4	1	1	5	2	5	1	5	5	5	5	3	4	4	3
1745	0	12	1	Kunming	Wuhua	5	4	5	5	5	5	5	5	5	5	5	4	5	4	5	4	4	5	5	5	4	4	5	4	5	5	1	5	5	2	3	5	1	5	3	5	5	5	5	5	5	5	5
1746	0	12	1	Kunming	Wuhua	5	5	5	5	5	5	5	5	5	5	5	5	5	4	5	5	5	5	3	5	5	4	5	4	1	1	1	5	5	1	1	5	1	5	1	4	4	4	4	5	5	5	5
1747	0	12	1	Kunming	Wuhua	4	5	4	4	4	4	4	4	3	4	3	3	4	3	4	3	3	5	4	3	1	3	4	4	4	4	1	3	3	1	3	2	1	2	1	4	4	4	4	4	4	4	4
1748	0	12	1	Kunming	Yunda	5	5	5	5	4	4.25	5	5	5	5	5	5	5	3	5	1	5	5	5	5	4	3	5	4	1	1	1	5	4	2	3	5	1	4	2	4	4	4	4	5	5	2	5
1749	1	12	1	Kunming	Yunda	5	5	5	4	5	5	5	5	5	4	5	5	4	3	4	4	3	5	3	5	5	5	5	4	2	2	1	5	4	1	5	3	1	5	1	4	4	3	3	5	5	4	2
1750	1	12	0	Xishuangbanna	Zhongxin	4	5	5	4	5	4	5	4	4	5	5	4	4	3	5	3	5	5	5	4	3	4	4	4	1	3	1	4	4	4	5	5	2	4	1	5	5	5	5	4	4	4	5
1751	0	12	0	Hangzhou	Nanshan	5	5	5	5	5	5	5	5	5	5	5	5	5	3	5	5	5	5	5	5	5	5	5	5	4	4	1	5	5	1	4	5	5	5	1	5	5	5	5	5	5	3	2
1752	1	12	0	Hangzhou	Nanshan	5	5	5	5	5	5	5	5	5	5	5	5	5	5	5	5	5	5	3	5	5	5	5	5	1	1	1	5	5	5	1	5	5	5	1	5	3.25	5	5	5	5	5	5
1753	1	12	0	Hangzhou	Nanshan	4	5	5	5	5	5	3	4	3	4	3	4	4	3	3	4	5	5	3	2	1	2	3	5	1	1	1	2	4	2	1	4	3	3	1	3	3	3	3	4	5	3	4
1754	1	12	0	Hangzhou	Nanshan	5	5	5	5	5	5	5	5	5	5	5	5	5	5	5	5	5	5	5	5	5	5	5	5	1	1	1	5	5	1	2	1	1	5	1	4	4	4	4	4	4	5	4
1755	1	12	0	Hangzhou	Nanshan	5	5	5	5	5	5	5	5	5	5	5	5	5	5	5	3	5	5	5	5	3	5	5	5	4	2	1	5	5	1	1	5	1	5	1	5	5	5	5	5	5	5	5
1756	0	12	0	Hangzhou	Nanshan	5	5	5	5	5	5	5	5	5	5	5	5	5	4	5	4	5	5	4	3	3	3	4	5	1	1	1	4	4	1	2	5	1	3	1	3	2	3	3	5	5	3	5
1757	0	12	0	Hangzhou	Nanshan	5	5	5	5	5	5	5	5	5	5	4	5	5	5	4	5	5	5	5	5	1	5	5	5	1	1	1	4	4	1.25	3	2	1	3	1	4	4	4	4	4	5	3	5
1758	0	12	1	Hangzhou	Shengli	5	5	5	5	5	5	5	5	5	5	5	5	5	5	5	5	4	5	5	5	4	5	5	5	1	1	1	1	5	2	1	5	2	5	5	5	5	5	5	5	5	3	4
1759	0	12	1	Hangzhou	Fenghuang	5	5	5	5	5	5	5	5	5	5	5	5	5	3	5	4	5	5	5	3	3	3	5	5	1	1	1	4	5	1	5	5	5	5	2	5	5	5	5	5	5	3	5
1760	1	12	1	Hangzhou	Shengli	5	5	5	5	5	5	5	5	5	5	1	1	5	5	5	5	5	5	5	1	1	5	5	5	1	1	1	1	5	1	5	1	1	5	1	1	1	5	1	5	5	5	5
1761	1	12	1	Hangzhou	Shengli	5	5	5	5	5	5	5	5	5	5	5	5	5	5	5	5	5	5	5	5	5	5	5	5	5	5	1	5	5	5	3	5	5	1	1	5	5	5	5	5	5	5	5
1762	1	12	1	Hangzhou	Fenghuang	5	5	5	3	5	5	3	3	4	5	5	5	5	4	5	5	5	5	5	1	1	5	3	5	1	1	1	5	5	2	5	5	1	5	1	5	3	2.25	3	5	2	5	5
1763	1	12	1	Hangzhou	Fenghuang	5	5	5	5	5	5	5	5	5	5	5	5	5	5	5	5	5	5	5	5	5	5	5	5	1	5	1	5	5	1	3.25	5	1	5	2	5	5	5	5	5	5	5	5
1764	0	12	1	Hangzhou	Fenghuang	4	5	5	5	5	5	5	5	5	5	5	5	5	4	3	5	5	5	4	3	3	3	5	5	1	5	1	4	5	1	5	5	1	5	3	5	5	5	4	5	5	3	4
1765	0	12	0	Kunming	Erjie	5	5	5	4	5	5	4	4	4	3	3	4	5	4	5	4	4	5	4	5	3	4	4	5	3	2	1	3	2	1	5	3	1	5	1	4	2	4	2	3	4	5	4
1766	0	12	0	Kunming	Erjie	5	4	5	5	5	5	5	5	4	4	4	5	4	3	5	5	4	5	5	5	3	4	5	5	5	5	1	5	5	1	5	5	1	3	1	5	5	5	5	4	4	5	5
1767	0	12	0	Kunming	Erjie	5	5	5	5	5	5	5	5	5	5	5	5	5	5	5	3	5	5	4.25	5	3	4	5	5	1	1	1	4	3	1	1	3	2	2	1	2	2	2	2	2	3	2	5
1768	0	12	0	Kunming	Erjie	5	5	5	5	5	5	5	5	5	5	5	5	5	4	4	3	5	5	4	4	3	4	5	5	3	5	1	4	4	4	3	5	5	4	1	4	4	3	2	4	5	5	5
1769	0	12	0	Kunming	Erjie	5	5	5	5	5	5	5	5	5	5	5	5	5	3	5	5	3	5	5	3	2	2	4	5	5	5	1	3	5	1	3	5	2	4	3	5	5	5	5	5	2	3	3
1770	0	12	0	Kunming	Erjie	5	5	5	5	5	5	5	5	4	4	4	4	4	3	4	5	5	5	5	2	2	4	1	5	1	1	1	2	5	1	5	3	1	3	1	4	2	5	5	3	4	5	5
1771	0	12	0	Kunming	Zhugou	5	5	5	5	5	5	5	5	5	5	5	5	5	4	5	4	5	5	5	5	4	4	4	5	3	4	1	4	2	1	2	4	1	4	2	3	3	3	3	4	4	4	5
1772	0	12	0	Kunming	Zhugou	5	5	5	4	5	4	4	4	3	4	4	5	5	4	4	5	5	5	5	5	5	5	5	5	5	5	1	2	1	1	4	2	4	3	1	1	1	3	3	3	2	2	2
1773	1	12	0	Kunming	Erjie	5	5	5	5	5	5	2	5	5	5	5	5	5	2	3	5	3	5	5	5	5	5	5	5	5	5	1	2	2	1	2	1	1	3	1	5	5	4	3	2	2	2	4.25
1774	1	12	0	Kunming	Zhugou	5	5	5	5	5	5	5	5	5	5	5	5	5	4	5	5	5	5	5	4	4	5	5	5	5	5	1	5	4	4	2	5	5	4	1	2	2	2	2	4	4	4	4
1775	0	12	1	Kunming	Wuhua	5	5	5	5	5	5	5	5	5	5	5	1	5	5	5	5	5	5	5	5	5	5	5	5	5	5	1	5	5	2	1	5	1	5	5	5	5	5	5	5	5	5	3
1776	1	12	1	Kunming	Wuhua	5	5	5	5	5	4	3	5	5	5	5	2	5	4	4	5	5	5	5	2	3	4	5	5	3	4	1	5	5	1	3	3	2.5	5	2	4	4	4	5	3	5	5	5
1777	1	12	1	Kunming	Wuhua	5	5	5	5	5	4	4	4	5	5	4	5	5	4	5	5	5	5	5	3	3	5	4	5	3	5	1	5	5	5	5	5	1	5	1	4	4	4	5	3	4	2	5
1778	1	12	1	Kunming	Wuhua	5	5	5	5	5	5	5	5	5	5	5	1	5	5	5	5	5	5	5	1	1	5	5	5	5	5	1	5	5	1	4	5	1	5	1	5	5	5	5	5	5	5	5
1779	1	12	1	Kunming	Wuhua	5	3	5	4	4	4.75	5	5	5	4	4	2.75	5	4	5	3	5	5	5	4	1	5	4	5	2	1	1	5	5	1	5	5	1	5	1	5	5	5	5	5	5	5	5
1780	1	12	1	Kunming	Wuhua	5	5	5	5	5	5	4	5	5	5	5	4	5	5	4	3	5	5	4	5	5	5	5	5	1	5	1	5	5	5	3	5	3	5	1	5	5	5	5	5	4	5	5
1781	1	12	1	Kunming	Yunda	5	5	5	5	5	5	5	5	5	5	5	1	5	5	5	5	5	5	5	1	5	5	5	5	5	5	1	5	5	1	3	5	1	5	1	5	5	5	5	5	5	5	5
1782	1	12	1	Kunming	Yunda	5	5	5	5	5	4	5	5	4	5	4	5	5	4	5	4	5	5	4	3.25	4	5	5	5	2	4	1	4	3	2	4	5	2	5	1	4	3	2	2	5	3	1	4
1783	1	12	0	Xishuangbanna	Zhongxin	5	5	5	4	5	5	5	4	3	5	4	4	5	4	5	1	4	5	2	3	1	4	4	5	2	4	1	4	3	1	3	4	2	4	2	2	3	1	1	4	3	4	5
1784	0	12	1	Xishuangbanna	Yixiao	5	5	5	5	5	5	5	5	5	5	5	5	5	5	5	5	5	5	5	5	5	5	5	5	1	1	1	4	2	2	2	3	1	4	1	2	2	2	2	5	3	2	4
1785	1	12	1	Xishuangbanna	Shiji	5	5	5	4	5	5	4	5	5	5	5	4	5	5	5	4	5	5	5	4	5	5	3.75	5	4	4	1	5	3	1	4	5	3	4	1	3	4	2	3	5	5	4	5
1786	1	12	1	Xishuangbanna	Shiji	5	5	5	4.5	5	4.75	1	5	3	5	4.5	3	4	3	5	5	5	5	4	5	1	5	5	5	4	2	1	3	1	1	3	1	1	2	1	2	1	1	1	5	5	2	5
1787	1	12	1	Xishuangbanna	Yixiao	5	5	5	5	5	5	5	5	5	5	5	5	5	5	5	5	5	5	5	5	5	5	5	5	5	5	1	5	3	1	2	1	1	1	1	5	5	1	2	4	5	1	1
1788	1	12	1	Hangzhou	Fenghuang	5	4	4	3	3	4	3	4	3	2	2	4	3	2	4	2	3.75	2	3	1	2	2	4	1	1	1	1	2	4.75	1	3	1	1	3	1	4	5	5	3	2	2	1	2
1789	0	12	1	Kunming	Yunda	5	5	5	4	5	5	4	5	5	3	5	5	5	2	3	2	3	2	4	3	1	5	4	2	1	1	1.5	3	4	1	4	5	2	4	1	2	3	4	5	2	5	2	4
1790	1	12	0	Kunming	Erjie	4	5	5	4	4	5	5	5	5	4	4.75	5	5	4	4	4	4.5	4	5	4	4	3	3.25	2.5	4	2	1.5	3	3	3	4	2	3	3	2	3	2	2.5	3	2	3	3	3
1791	1	12	0	Kunming	Erjie	5	2	4	4	4	2	4	3	3	4	5	3	3	3	4	4	4	3	4	2	3	2	3	3	2	3	1.75	2.5	3	1	5	2	1	3	1	1	1	1	2	3	1	2	3
1792	0	12	1	Kunming	Lianhua	4	5	5	5	5	5	5	5	5	3	5	5	5	3	2	4	2	5	5	3	2	3	4	3	2	2	1.75	2	3	2	4	4	2	2	2	5	5	5	5	4	5	2	5
1793	0	12	1	Kunming	Yunda	4	5	5	5	5	5	5	3	5	3	4	5	5	5	5	5	5	5	5	5	3	2	3	4	2	3	1.75	5	5	3	3	5	1	4	1	2	5	5	5	5	5	2	4
1794	1	12	1	Hangzhou	Shengli	4	4	4	3	2	3	4	3	3	3	3	4	3	3	3	1	1	1	1	1	1	1	1	1	1	1	2	1	2	1	3	1	1	1	1	1	2	2	2	1	2	1	1
1795	1	12	0	Xishuangbanna	Erxiao	1	5	5	1	1	2	3	4	1	2	5	1	3	1	1	1	1	1	1	1	1	1	1	1	1	1	2	1	5	5	4	1	5	1	4	2	1	1	1	3	1	1	1
1796	1	12	0	Xishuangbanna	Erxiao	3	5	4	3	3	2	3	2	2	3	3	2	2	2	1	1	1	1	2	1	1	1	1	1	1	1	2	1	2	3	2	1	2	1	1	1	1	1	1	2	2	2	1
1797	1	12	1	Hangzhou	Fenghuang	5	5	5	5	5	3	5	5	3	3	3	3	4	3	2	5	3	1	3	5	1	2	2.25	3	4	4	2	1	4	1	1	3	1	2	3	4	4	4	4	4	5	5	3
1798	0	12	1	Hangzhou	Shengli	3	3	3	3	3	3	2	1	1	3	5	3	2	2	2	2	4	2	2	1	1	1	2	1	1	1	2	2	2	1	2	1	1	1	1	1	1	1	1	2	2	1	3
1799	1	12	0	Xishuangbanna	Erxiao	3	2	4	2	4	3	2	3	3	3	5	2	3	1	1	1	2	2	1	1	1	1	1	1	1	1	2	1	1	3	3	2	1	1	2	1	1	1	1	1	1	1	1
1800	0	12	0	Hangzhou	Nanshan	5	4	4	4	4	4	3	4	4	3	5	3	5	4	4	3	4	2	3	3	1	2	2	2	1	1	2	3	3	1	3	3	3	3	1	3	3	3	3	3	2	3	3
1801	0	12	1	Kunming	Yunda	3	4	3	3	3	3	3	3	3	3	3	3	3	2	2	2	2	2	2	4	2	2	2	2	2	2	2	2	2	2	1	2	2	2	2	2	2	2	2	2	2	2	2
1802	1	12	0	Hangzhou	Nanshan	4	5	5	5	5	5	4	4	5	3	5	5	4	4	5	4	4	2	4	5	1	4	5	4	1	1	2	4	4	1	4	5	5	5	5	5	5	5	3	5	4	2	3
1803	0	12	1	Hangzhou	Shengli	5	5	5	5	2	2	5	2	2	2	2	5	5	1	3	2	1	3	2	3	3.25	1	1	1	1	1	2	2	3	1	1	2	2	1	1	2	2	2	2	3.25	1	1	1
1804	1	12	1	Hangzhou	Shengli	3	4	5	3	4	3	3	3	3	3	3	4	4	2	3	1	2	3	3	1	1	4	2	1	1	1	2	2	3	1	4	2	1	3	1	2	2	1	2	3	4	1	4
1805	0	12	0	Kunming	Zhugou	5	5	5	4	5	5	3	5	5	4	5	4	4	3	2	3	1	3	3	2	1	3	3	1	5	4	2	3	3	2	1	5	3	4	2	3	2	4	5	3	4	3	1
1806	0	12	1	Kunming	Lianhua	5	1	5	4	5	4	5	5	4	5	5	5	5	3	3	2	1	3	2	3	1	3	4	1	1	1	2	2	4	1	1	5	2	4	1	5	5	5	5	5	5	2	3
1807	1	12	0	Xishuangbanna	Erxiao	3	4	4	4	4	1		3	2	3	3	3	3	2	3	2	2	3	2	2	1	3	2	1	1	1	2	2	2	2	1	2	2	2	1	2	1	1	2	2	2	3	2
1808	1	12	0	Hangzhou	Nanshan	5	5	5	5	5	5	5	5	5	4	5	5	5	3	3	2	3	3	3	3	3	2	3	2	1	1	2	3	3	2	2	3	3	3	2	2	1	1	2	5	4	3	4
1809	1	12	1	Hangzhou	Shengli	3	5	5	5	5	5	5	5	5	5	5	5	5	3	2	3	5	3	4	1	1	3	2	2	1	1	2	3	4	4	3	3	1	2	2	3	3	3	3	4	2	1	3
1810	0	12	0	Kunming	Erjie	5	5	5	4	5	5	5	5	5	4	5	4	5	3	4	3	3	3	3	3	2	1	2	2	1	1	2	4	4	1	2	4	5	3	2	3	3	3	3	3	3	5	5
1811	0	12	0	Kunming	Zhugou	5	5	5	4	5	5	4	5	5	4	5	2	4	3	2	3	1	3	3	2	1	5	3	2	5	5	2	4	3	2	1	5	1	2	1	3	2	2	2	2	3	4	2.5
1812	1	12	0	Kunming	Zhugou	3	5	4	3	4.75	3.75	5	4	4	1	5	3.25	4.5	2	5	3	3	3	4	1	1	3	3.75	2	3	4	2	1	3	3	1	2	1	2	3	1	2	3	1	4	1	2	3
1813	0	12	0	Xishuangbanna	Zhongxin	4	5	5	4	5	4	5	5	4	4	5	4	5	2	5	4	4	3	3	3	2	3	2	2	2	2	2	2	3	3	3	2	3	2	3.25	3	3	3	3.25	2	4	3	3
1814	0	12	0	Xishuangbanna	Erxiao	5	5	5	5	5	5	4	5	5	5	5	5	5	3	3	3	3	3	1	2	3	3	3	2	1	1	2	3	4	2	2	3	2	2	2	3	3	2	2	2	2	4	3
1815	1	12	0	Hangzhou	Nanshan	4	5	5	4	5	5	3	3	3	3	4	3	3	3	4	2	5	3	4	2	2	2	2	3	1	1	2	2	3	1.25	1	4	3	3	1	2	2	2	2	3	2	3	1
1816	1	12	1	Kunming	Lianhua	4	5	5	5	5	5	3	4	4	2	5	4	5	3	3	3	4	3	3	4	3	4	4	3	3	3	2	5	3	1	2	4	2	4	1	3	3	3	2	5	4	5	5
1817	1	12	0	Xishuangbanna	Changle	4	5	5	4	5	5	3	4	5	4	3	3	5	3	5	4	4	3	5	3	2	5	3	4	4	3	2	4	2	1	1	4	5	4	3	2	4	5	2	3	4	3	5
1818	1	12	0	Xishuangbanna	Zhongxin	5	5	4	3	4	4	5	3	5	4	5	1	3	5	5	4	3	3	5	2	4	4	3	4	3	2	2	4	4	2	2	5	1	4	2	4	4	4	5	4	5	5	3
1819	0	12	0	Xishuangbanna	Erxiao	5	4	5	5	5	5	4	5	4	5	5	4	5	3	4	2	3	3.5	5	4	2	3	3	2	2	2	2	3	3	2	5	5	1	3	5	2	2	2	2	3	1	1	1
1820	1	12	1	Kunming	Lianhua	5	4	5	3	3	3	3	4	4	3	2	1	5	3.25	2	4	2	3.5	2	2	1	3	1	3	1	1	2	5	3	1	5	4	4	1	2	4	4	4	5	3	3	2	1
1821	0	12	0	Hangzhou	Nanshan	4	5	4	4	4	4	4	3	3	3	3	2	3	2	5	2	3	4	3	1	1	2	1	1	1	1	2	2	3	1	3	3	1	2	2	1	1	1	1	3	3	2	3
1822	0	12	1	Hangzhou	Shengli	5	5	5	5	5	5	3	3	3	5	4	5	4	2	4	3	3	4	2	4	1	1	1	1	1	1	2	3	4	1	2	2	1	2	1	4	4	4	4	1	1	1	1
1823	1	12	1	Hangzhou	Fenghuang	5	5	5	4	4	4	3	3	3	2	4	3	4	2	3	3	4	4	3	1	1	1	1	1	1	1	2	2	3	1	1	2	1	4	1	3	3	4	3	5	5	4	3
1824	1	12	0	Kunming	Zhugou	4	4	4	3	4	4	4	4	4	3	3	4	4	2	4	1	2	4	2	3	1	3	2	1	1	1	2	2	3	3	5	3	2	1	2	1	1	1	1	2	3	2	1
1825	0	12	1	Kunming	Lianhua	4	4	5	4	4	4	3	3	3	2	4	3	5	3	4	3	2	4	3	1	1	4	1	1	2	1	2	2	2	3	2	4	2	1	1	2	1	2	2	2	2	2	3
1826	1	12	1	Kunming	Lianhua	5	4	5	4	4	4	5	3	3	3	4	3	3	3	3	2	2	4	2	1	1	2	1	1	1	1	2	2	2	2	5	2	1	2	2	4	3	2	4	3	3	1	3
1827	0	12	0	Xishuangbanna	Zhongxin	5	5	5	5	4	4	5	3	3	3	4	2	4	3	4	1	1	4	5	3	1	1	1	1	1	1	2	4	3	1	5	4	1	1	1	3	5	2.5	5	5	5	3	5
1828	1	12	0	Xishuangbanna	Erxiao	5	5	5	4	5	5	4	5	5	4	5	3	4	3	3	3	3	4	4	2	2	2	2	1	2	2	2	2	1	1	2	3	2	2	2	2	2	1	1	2	4	2	2
1829	1	12	0	Xishuangbanna	Changle	5	4	5	5	5	5	4	4	4	5	5	4	4	3	5	3	5	4	4	4	5	5	3	1.75	4	5	2	3	3	2	5	4	2	4	2	5	3	3	5	5	3	5	5
1830	0	12	0	Hangzhou	Nanshan	4	5	5	4	4	4	3	3	3	3	4	4	4	3	4	1	2	4	3	3	2	2	2	2	1	1	2	2	3	2	2	4	1	3	1	2	2	2	2	2	2	3	2
1831	1	12	0	Hangzhou	Nanshan	4	3	5	3	4	4	5	3	5	5	4	4	3	3	4	3	3	4	4	3	2	3	3	2	1	1	2	3	3	1	1	2	2	3	1	2	2	3	2	3	4	2	3
1832	1	12	0	Hangzhou	Lijia	4	5	5	4	4	4	4	5	4	4	4	3	4	3	3	3	3	4	4	2	2	3	2	2	2	2	2	3	1	1	1	2	1	3	2	2	2	2	2	3	3	4	4
1833	0	12	1	Hangzhou	Shengli	5	5	5	3	4	5	3	3	5	4	3	3	4	3	3	3	2	4	4	3	1	2	4	2	4	4	2	5	4	1	5	4	3	3	1	4	4	4	4	3	5	3	5
1834	1	12	1	Hangzhou	Shengli	3	4	4	4	4	4	4	3	3	3	3	3	3	3	3	2	3	4	3	1	1	1	1	2	1	1	2	3	4	2	1	2	1	2	2	3	3	3	3	3	2	2	2
1835	0	12	1	Hangzhou	Fenghuang	4	5	5	2.5	4	4	5	4	4	4	5	5	5	3	2	2	3	4	4	4	2	2	1	2	1	1	2	3	1	1	3	4	1	2	3	3	2	2	2	5	3.5	4	2
1836	0	12	0	Kunming	Zhugou	4	5	4	4.5	5	5	3	5	4	4	5	4	4	2	4	2	4	4	4	2	2	2	3	2	2	2	2	4	4	1	4	5	3	4	1	4	2	4	2	3	2	4	2
1837	1	12	0	Kunming	Erjie	4	5	5	4	4	4	5	3	3	3.5	4.75	3	5	2	3	2	3	4	3	3	2	2	2	2	2	2	2	2	4	2	1	2	2	2	3	2	3.5	2	3	2	2	1	2
1838	0	12	0	Kunming	Zhugou	5	4	5	5	5	5	5	5	5	5	4	4	5	2	4	3	4	4	5	3	3	3	4	2	4	2	2	3	2	2	1	5	3	2	2	3	4	2	2	4	3	1	4
1839	1	12	0	Kunming	Zhugou	5	5	5	4	5	4	3	4	4	4	4	1	4	2	4	4	4	4	4	1	1	1	3	2	1	1	2	2	2	2	3	2	2	2	2	3	3	3	3	3	2	1	2
1840	0	12	1	Kunming	Lianhua	4	4	4	4	4	5	4	3	4	3	4	3	4	3	4	4	3	4	2	2	1	2	3	2	1	1	2	2	2	2	5	2	2	2	2	2	2	2	2	2	2	2	2
1841	1	12	1	Kunming	Wuhua	5	4	5	4	5	4	5	4	4	3	3	3	4	2	3	2	4	4	4	2	2	4	2	2	2	2	2	2	2	2	3	4	1	2	1	4	2	2	3	3	2	4	4
1842	0	12	0	Xishuangbanna	Zhongxin	4	2	4	3	4	4	5	5	5	4	4	5	4	3	3	3	4	4	3	1	3	3	2	2	3	3	2	3	2	2	2	4	3	4	2	4	4	3	3	4	4	3	3
1843	0	12	0	Xishuangbanna	Erxiao	5	4	5	4	5	4	4	5	5	4	5	4	5	3	3	3	4	4	3	3	1	2	3	2.5	2	2	2	3	1	4	1	4	4	3	1	1	1	1	2	3	2	2	3
1844	0	12	0	Hangzhou	Nanshan	4	4	5	4	4	4	5	4	4	4	5	4	4	3	4	3	5	4	2	2	2	3	3	3	1	1	2	2	4	1	5	2	2	2	2	3	3	3	3	3	4	4	4
1845	0	12	0	Hangzhou	Nanshan	4	5	5	5	3	5	5	5	5	5	5	3	4	3	3	4	5	4	5	2	2	2	3	3	5	5	2	2	3	1	1	2	2	3	1	3	2	2	2	3	3	3	5
1846	0	12	0	Hangzhou	Nanshan	3	5	5	3	5	3	3	3	5	3	3	5	5	3	3	4	3	4	4	2	1	5	2	3	1	1	2	2	2	2	2	2	2	2	2	1	1	1	1	2	2	1	3
1847	0	12	0	Hangzhou	Nanshan	5	5	5	4	4	4	4	4	4	5	4	3	4	3	2	4	5	4	4	1	1	4	1	3	1	1	2	2	3	1	4	4	2	4	1	2	1	2	2	5	5	3	4
1848	1	12	0	Hangzhou	Nanshan	5	5	5	5	4	5	4	3	4	4	4	3	4	3	5	3	5	4	4	3	1	3	3	3	1	2	2	3	4	1	2	3	2	3	2	2	2	2	2	5	3	4	2
1849	0	12	1	Hangzhou	Shengli	4	5	5	4	4	4	5	5	5	4	4	4	5	3	3	2	4	4	4	3	1	2	4	3	1	1	2	4	3	1	4	3	3	3	1	2	3	2	2	2	2	2	2
1850	0	12	1	Hangzhou	Cuiyuan	5	5	5	5	5	5	5	5	5	5	5	5	5	4	4	4	4	4	4	2	1	3	3	3	3	3	2	1	2	1	4	1	1	2	1	2	2	2	1	2	2	1	4
1851	0	12	1	Hangzhou	Fenghuang	4	5	5	3	4	4	2	3	2	2	2	4	2	3	5	3	5	4	2	1	1	1	1	3	1	1	2	4	4	1	3	1	1	1	1	2	2	4	4	3	4	1	2
1852	1	12	1	Hangzhou	Fenghuang	5	5	5	5	5	5	4	5	5	3	5	3	3	3	4	4	4	4	4	2	1	1	3	3	1	1	2	4	4	2	1	3	1	2	2	4	4	4	4	4	4	3	2
1853	1	12	1	Hangzhou	Fenghuang	5	5	5	5	5	5	5	5	5	5	3	1	5	3	3	4	4	4	4	2	3	3	2	3	1	1	2	4	4	2	2	4	2	3	1	4	4	4	4	3	4	2	4
1854	0	12	0	Kunming	Erjie	4	5	2	3	5	5	4	2	3	4	2	2	3	3	4	3	4	4	4	5	3	3	3.75	3	5	2	2	3	1	1	1	1	2	3	2	5	5	2	3	3.75	4	3.75	2
1855	0	12	0	Kunming	Erjie	5	5	5	5	5	5	5	5	5	5	5	5	5	3	4	5	3	4	5	3	2	3	4	3	5	5	2	3	4	2	2	4	2	3	2	4	3	4	3	4	5	5	2
1856	0	12	0	Kunming	Erjie	4	5	4	3	4	5	3	3	4	2	3	4	3	3	4	2	2	4	3	3	2	2	4	3	3	4	2	3	3	1	5	3	2	4	2	2	3	2.25	1.75	2	4	3	4
1857	0	12	0	Kunming	Erjie	5	4	4	4	4	4	4	4	4	5	4	2	3	4	4	3	4	4	4	2	1	4	3	3	1	1	2	4	3	1	2	4	2	3	3	3	2	2	1	3	3	2	2
1858	0	12	0	Kunming	Zhugou	4	2	5	4	5	4	3	5	4	4	3	3	5	4	3	5	5	4	4	2	2	4	3	3	4	3	2	4	4	1	1	2	3	5	1	4	4	3	2	4	5	5	5
1859	0	12	0	Kunming	Zhugou	5	5	5	5	5	5	5	5	4	4	4	3	4	3	3	2	3	4	4	3	3	2	4	3	5	5	2	4	5	2	4	2	4	3	2.25	2	3	2	2	4	4	5	3
1860	1	12	0	Kunming	Zhugou	5	5	5	5	5	3	3	4	4	5	5	3	4	3	4	5	4	4	1	3	3	4	2.5	3	3	2	2	3	4	1	2	3	2	3	2	3	3	2	3	3	3	3	3
1861	0	12	1	Kunming	Lianhua	3	4	4	3	3	3	4	4	3	3	5	3	3	2	3	4	3	4	3	3	2	3	4	3	2	2	2	4	3	1	2	4	2	3	1	3	3	3	3	3	3	2	3
1862	0	12	0	Xishuangbanna	Changle	4	4	5	4	5	5	4	5	5	4	4	3	4	3	2	4	3	4	4	2	2	3	2	3	3	3	2	3	2	1	2	2	2	4	2	3	4	3	3	3	2	2	3
1863	0	12	0	Xishuangbanna	Changle	4	5	3	5	4	5	3	5	5	4	4	3	5	4	5	3	5	4	4	3	3	2	4	3	2	3	2	5	2	2	3	5	2	5	4	3	3	3	2	5	4	5	4
1864	1	12	0	Xishuangbanna	Changle	3	1	4	4	4	3	3	4	4	5	5	3	4	3	4	3	4	4	4	3	3	4	5	3	3	2	2	4	3	1	2	4	2	3	2	5	5	3	3	4	3	5	2
1865	1	12	0	Xishuangbanna	Erxiao	4	4	5	4	4	5	4	4	3	5	3	4	4	3	3	2	3	4	3	1.75	2	3	1	3	1	3	2	2	2	2	1	1	3	2	1	2	2	2	2	3	3	2	2
1866	0	12	0	Xishuangbanna	Erxiao	5	4	4	3	5	4	3	4	3	3	4	3	5	3	4	3	3	4	5	2	2	4	4	3	1	3	2	5	3	1	1.25	3	2	2	1	2	2	1	2	4	3	4	4
1867	0	12	1	Hangzhou	Fenghuang	5	5	5	4	5	4	5	4	4	4	5	5	5	3	5	4	5	4	5	5	3	5	3	4	3	5	2	2	5	2	2	4	2	5	2	2	4	5	3	5	5	3	5
1868	1	12	0	Kunming	Erjie	4	5	5	5	5	5	2	5	5	5	4	4	4	4	5	3	5	4	3	4	1	4	5	4	3	3	2	3	3	1	1	1	1	3	1	3	3	4	2	3	2	4	2
1869	0	12	0	Kunming	Zhugou	4	5	5	5	5	4	5	4	4	5	5	4	5	4	5	4	3	4	4	5	3	3	5	4	5	3	2	4	3	1	2	5	1	3	1	2	3	2	1	5	5	4	3
1870	1	12	0	Kunming	Zhugou	5	5	4	3	4	5	4	5	4	3	3	4	4	3	3	5	3	4	5	2	5	4	3	4	3	4	2	2	3	1	3	1	1	1	3	1	1	1	1	4	5	1	5
1871	0	12	1	Kunming	Wuhua	5	4	5	3	5	3	5	3	3	5	4	5	4	2	3	2	2	4	5	2	1	1	5	4	1	1	2	3	5	1	4	3	4	1	1	5	4	2	5	2	3	1	2
1872	1	12	1	Kunming	Lianhua	4	4	5	4	4	4	5	4	4	4	4	3	4	3	4	4	4	4	3	4	4	4	4	4	4	2	2	3	3	2	2.5	3	1	2	2	5	5	5	5	3	4	3	2
1873	1	12	1	Xishuangbanna	Shiji	5	4	5	5	4	5	3	4	5	5	4	4	5	2	3	2	2	4	2	3	4	4	3	4	2	2	2	4	4	2	5	4	2	2	1	2	3	3	3	3	2	2	3
1874	0	12	1	Hangzhou	Fenghuang	5	5	5	5	5	5	5	5	5	5	5	5	5	5	5	5	5	4	5	5	4	3	5	5	1	1	2	3	4	1	5	5	3	4	1	2	2	3	3	4	4	2	5
1875	1	12	0	Kunming	Erjie	5	4	5	4	5	5	5	5	3	5	5	4	5	3	4	5	5	4	5	5	2	2	2	5	4	4	2	3	3	2	2	2	2	2	2	3	3	3	3	3	4	4	5
1876	1	12	1	Kunming	Lianhua	5	5	5	4	5	5	5	5	4	4	4	5	5	5	5	4	5	4	5	3	3	4	4	5	5	5	2	5	4	3	4	4	2	3	2	4	4	4	4	4	4	4	4
1877	1	12	0	Kunming	Erjie	5	5	5	4	5	5	5	5	5	5	2	4	4	4	4	3	4	4.25	5	3	2	3	2	3	2	2	2	3	3	3	3	3	4	4	4	3	3	2	2	3	4	4	5
1878	1	12	1	Hangzhou	Cuiyuan	5	5	5	3	3	3	5	3	4	3	5	5	3	2	5	5	5	4.75	5	3.25	1	2	4	2	5	1	2	2	5	1	2	5	1	5	2	3	4	5	2	5	5	1	5
1879	0	12	0	Hangzhou	Nanshan	4	5	5	5	5	4	4	3	3	4	3	3	5	3	4	3	4	5	4	3	1	2	3	1	1	1	2	2	3	1	1	3	2	3	2	2.5	3	3	4	3	3	3	3
1880	0	12	1	Hangzhou	Fenghuang	5	5	5	5	5	5	5	5	5	5	5	5	5	5	5	5	5	5	5	1	1	5	5	1	1	1	2	5	5	1	1	5	2	5	5	5	5	5	5	5	5	5	5
1881	1	12	0	Kunming	Zhugou	5	5	5	5	5	5	4	5	3	5	5	1	5	4	5	3	4	5	5	2	3	5	2	1	1	1	2	3	4	1.25	1	1	3	3	2	4	2	3	2	3	1	2	3
1882	1	12	0	Kunming	Zhugou	4	5	4	4	5	5	4	5	3	5	5	3	5	2	4	2	4	5	4	2	1	3	2	1	1	2	2	3	3	1	5	4	2	3	1	2	2	2	3	3	4	4	5
1883	1	12	0	Kunming	Zhugou	5	5	5	5	5	5	4	5	3	5	5	1	5	4	5	3	4	5	5	2	3	5	2	1	1	1	2	3	4	1	4	5	3	4	1	2	2	3	1	4	5	4	3
1884	1	12	0	Kunming	Zhugou	5	5	4	3	3	5	4	5	3	4	3	4	4	3	3	4	3	5	4	5	5	5	3	1	1	4	2	2	3	1	2.25	1	1	3	1	1	1	1	1	4	4	5	1
1885	0	12	1	Kunming	Yunda	4	5	5	5	5	5	4	5	4	4	5	5	4	2	4	2	3	5	2	4	3	3	3	1	1	1	2	5	3	2	4	4	2	2	2	3	3	3	3	4	4	2	3
1886	1	12	1	Kunming	Yunda	5	5	5	5	1	4	5	4	4	5	5	1	4	3	5	3	4	5	3	2	1	1	1	1	1	1	2	2	2	2	3	2	1	1	1	2	2	2	3	4	4	2	3
1887	0	12	0	Xishuangbanna	Zhongxin	4	4	3	4	1	4	5	5	5	3	2	3	5	3	4	2	4	5	3	1	1	1	2	1	1	2	2	3	1	3	4	2	1	1	1	4	4	3	4	3	2	2	2
1888	1	12	0	Xishuangbanna	Erxiao	4	5	5	4	5	4	3	5	3	4	5	4	3	3	5	3	4	5	4	5	2	3	1	1	1	1	2	2	1	1	2	2	1	4	1	1	1	1	1	4	4	3	2
1889	0	12	1	Xishuangbanna	Shiji	4	5	5	4	5	5	3	4	3	2	4.5	4	4	2	3	2	3	5	2	1	5	4	3.75	1	4	1	2	3	1	2	4	4	1	3	2	5	2	4	5	3	3	5	5
1890	0	12	1	Xishuangbanna	Shiji	5	5	5	5	5	5	3	4	3	4	4	4	5	2	3	1	2	5	2	2	1	1	1	1	1	1	2	1	2	1	5	3	1	2	3	1	1	1	1	2	1	1	1
1891	0	12	0	Xishuangbanna	Changle	4	4	5	4	5	5	5	5	4	5	4	4	4	5	5	4	5	5	5	5	4	4	4	1.75	3	5	2	5	3	1	4	3	4	4	1	3	3	3	3	3	3	4	5
1892	0	12	0	Hangzhou	Nanshan	4	4	4	4	5	4	4	4	4	4	4	4	5	3	3	3	4	5	4	3	2	2	4	2	1	1	2	5	5	1	2	5	2	4	1.5	4	2	2.5	3	2	2	2	3
1893	1	12	0	Hangzhou	Nanshan	5	4	5	5	5	5	5	4	4	3	5	4	5	3	4	4	5	5	4	2	3	3	4	2	1	1	2	4	4	1	2	4	2.5	3.5	1	4	4	3	4	3	2	4	5
1894	1	12	0	Hangzhou	Lijia	4	5	5	4	5	4	5	3	3	5	5	5	5	3	4	4	5	5	2	3	4	3	3	2	1	3	2	3	4	1	3	4	1	2	1	1	2	1	1	4	3	5	5
1895	1	12	0	Hangzhou	Nanshan	5	5	5	4	5	4	3	4	3	3	2	2	4	3	4	3	2	5	4	1	1	1	2	2	1	1	2	2	3	2	3	3	1	4	2	2	2	2	1	2	3	4	2
1896	0	12	1	Hangzhou	Shengli	5	5	5	5	4	5	5	5	5	3	5	5	5	2	2	3	5	5	2	5	2	4	4	2	1	1	2	4	4	1	3	3	1	3	2	3	3	3	3	4	4	2	2
1897	1	12	1	Hangzhou	Shengli	3	4	5	5	3	3	4	2	5	3	1	4	5	3	2	2	4	5	2	1	1	2	5	2	1	1	2	4	4	1	4	2	1	2	2	3	3	3	3	4	4	2	3
1898	1	12	1	Hangzhou	Shengli	5	5	5	3	3	3	3	3	3	3	4	3	3	3	4	2	3	5	2	4	1	1	5	2	2	2	2	4	4	1	5	3	1	1	1	2	2	3	2	2	3	2	3
1899	1	12	1	Hangzhou	Fenghuang	5	5	5	4	4	4	3	5	5	3	5	5	4	3	5	5	2	5	3	5	3	5	5	2	1	1	2	4	3	4	5	5	4	5	2	3	4	3	4	5	5	2	5
1900	0	12	0	Kunming	Erjie	5	5	5	3	5	5	4	4	5	4	5	3	3	3	5	4	5	5	4	3	2	2	3	2	2	2	2	4	2	1	4	5	2	3	1	5	4	3	4	4	3	5	4
1901	0	12	0	Kunming	Erjie	5	5	5	3	4	4	4	4	5	4	5	3	4	3	3	3	4	5	3	2	2	2	2	2	3	3	2	2	3	1	3	4	3	2	3	3	3	3	3	2	3	3	3
1902	0	12	0	Kunming	Erjie	4	5	5	5	4	5	4	4	3	5	3	3	4	4	3	3	5	5	3	2	2	4	3.25	2	1	1	2	3	3	1	5	3	2	4	3	3	2	2	3	2	2	4	3
1903	0	12	0	Kunming	Zhugou	5	5	5	5	5	5	5	5	5	5	5	5	5	4	5	4	5	5	3	4	4	4	4	2	1	1	2	4	3	2	2	3	2	3	2	2	2	2.25	3.75	3	3	3	3
1904	0	12	0	Kunming	Zhugou	5	5	5	5	5	5	3	4	4	5	3	4	5	5	3	5	4	5	5	3	3	4	4	2	4	3	2	4	3	2	1	3	2	2	1	2	4	3	3	2	3	2	3
1905	1	12	0	Kunming	Zhugou	4	5	5	5	5	4	2	3	3	3	3	3	3	2	5	3	4	5	2	1	2	3	1	2	1	1	2	1	2	1	3	2	1	2	2	2	2	2	2	3	4	2	5
1906	0	12	1	Kunming	Lianhua	4	4	4	5	4	4	4	4	4	4	4	4	4	3	3	3	2	5	4	3	2	3	4	2	1	1	2	4	3	1	4	3	1	1	1	3	3	3	3	4	2	2	3
1907	0	12	1	Kunming	Wuhua	5	5	5	5	5	5	5	5	5	5	5	5	5	3	5	3	4	5	4	5	3	4	5	2	2	2	2	3	5	1	3	5	1	3	1	5	5	5	5	3	3	3	4
1908	0	12	1	Kunming	Yunda	5	5	5	4	4	3	3	3	3	2	5	3	4	2	5	3	3	5	2	3	1	5	2	2	1	1	2	2	3	3	1	5	2	1	2	1	1	1	1	3	4	1	2
1909	1	12	1	Kunming	Lianhua	5	5	5	4	5	5	4	3	3	4	5	3	3	3	5	4	2	5	3	2	1	4	2	2	1	1	2	4	4	2	1	3	2	5	1	5	3	3	2	5	5	3	2
1910	0	12	0	Xishuangbanna	Changle	5	5	5	4	5	5	5	5	5	4	5	3	5	4	5	3	5	5	5	3	2	2	2	2	2	4	2	5	3	2.25	2	4	2	4	2	5	5	5	4	3	4	3.5	4
1911	0	12	0	Xishuangbanna	Zhongxin	5	5	5	4	5	5	5	4	5	3	4	3	5	3	5	3	4	5	4	2	2	2	4	2	1	2	2	4	2	1	2	3	2	3	2	3	4	4	2.25	2	4	4	5
1912	0	12	0	Xishuangbanna	Erxiao	5	5	5	5	5	5	4	4	3	5	4	3	5	3	4	3	5	5	5	3	2	4	3.5	2	4	4	2	3	2	2	4	5	4	5	5	2	2	5	5	4	4	5	4
1913	0	12	0	Xishuangbanna	Erxiao	4	4	5	5	5	5	5	5	4	5	4	4	4	4	5	4	2.25	5	4	4	4	5	5	2	2	2	2	5	2	1	3	3	4	5	2	5	5	5	4	4	3	4	5
1914	0	12	0	Xishuangbanna	Erxiao	5	4	5	4	4	5	4	5	4	3	4	2	4	3	4	4	2	5	4	2	1	2	1	2	2	2	2	2	1	1	5	2	2.5	1.25	4	2	2	1	2	2	2.5	2.25	3
1915	0	12	0	Xishuangbanna	Erxiao	5	5	5	5	5	5	4	5	5	4	5	4	5	4	5	3	4	5	3	2	2	3	2	2	1	1	2	4	3	3	4	5	5	4	5	3	3	1	1	5	4	2	4
1916	1	12	0	Xishuangbanna	Zhongxin	5	5	4	5	5	4	5	4	5	4	4	2	5	4	4	2	3	5	3	3	2	5	3	2	1	2	2	3	4	1	1	5	1	4	3	2	4	2	2.25	3	4	5	3
1917	0	12	0	Hangzhou	Nanshan	5	5	5	5	5	5	5	5	5	5	5	4	3	4	5	4	5	5	3	4	3	2	5	2.75	1	3	2	4	5	1	2	5	2	2	2	3	3	3	2	5	5	4	5
1918	1	12	0	Hangzhou	Nanshan	4	5	5	4	4	5	4	4	4	5	3	5	4	4	5	3	4	5	3	3	3	4	4	3	3	4	2	4	4	1	3	3	2	4	1	3	3	4	5	4	3	2	3
1919	1	12	0	Hangzhou	Nanshan	5	5	5	4	5	5	4	4	3	4	4	4	5	4	5	2	4	5	3	2	2	2	4	3	1	1	2	2	4	1.25	1	2	1	3	1	2	2	2	3	4	2	2	5
1920	0	12	0	Hangzhou	Nanshan	4	5	5	4	5	4	5	4	5	5	5	4	4	4	4	4	5	5	5	3	3	3	3	3	4	4	2	3	4	1	2	5	2	3	1	5	5	5	5	4	4	3	3
1921	0	12	0	Hangzhou	Nanshan	5	5	5	5	5	5	4	5	5	4	5	4	5	5	5	3	5	5	4	3	2	3	4	3	2	3	2	4	4	1	4	5	3	4	2	3	3	3	3	3	5	4	4
1922	1	12	0	Hangzhou	Nanshan	4	4	4	3	3	4	4	4	3	5	4	3	3	4	4	3	4	5	3	2	2	2	4	3	2	2	2	4	4	1	5	4	2	3	3	2	1	3	1	3	5	4	3
1923	1	12	0	Hangzhou	Nanshan	5	4	5	5	5	5	5	4	5	5	3	5	5	4	4	5	5	5	5	4	3	5	4	3	1	1	2	3	5	1	1	3	2	5	1	5	5	5	5	5	5	5	5
1924	0	12	1	Hangzhou	Shengli	5	4	5	3	5	3	4	3	3	3	4	3	3	3	4	4	3	5	4	1	1	1	2	3	1	1	2	2	3	3	2	4	1	2	2	3	3	3	3	2	4	2	3
1925	1	12	1	Hangzhou	Fenghuang	5	5	5	5	5	5	5	5	5	5	5	5	5	4	5	3	5	5	5	5	2	5	5	3	1	1	2	5	5	1	3	3	1	5	2	5	5	5	5	5	5	5	5
1926	0	12	0	Kunming	Erjie	5	5	5	5	5	5	5	4	4	4	4	4	5	3	4	4	4	5	4	3	3	4	3	3	3	3	2	4	4	2	2	3	2	3	3	3	3	3	2	3	3	4	3
1927	0	12	0	Kunming	Erjie	5	5	5	4	5	5	5	5	4	3	4	5	5	5	5	3	5	5	5	4	2	4	5	3	3	4	2	4	3	1	2	2	1	1	2.5	2	3	3	3	4	4	4	4
1928	1	12	0	Kunming	Zhugou	5	5	5	5	5	5	1	3	4	4	4	3	5	3	4	5	4	5	1	3	3	5	2	3	3	3	2	5	3	2	1	4	2	4	1	2	2	4	4	3	1	3	2
1929	1	12	1	Kunming	Wuhua	5	5	5	5	5	5	5	5	5	5	5	5	5	4	5	3	4	5	5	5	5	5	5	3	2	1	2	3	4	1	4	3	1	2	1	3	3	2	3	5	3	5	5
1930	1	12	1	Kunming	Wuhua	5	5	5	5	5	5	5	4	4	5	4	5	5	4	4	4	4	5	5	5	3	5	4	3	3	4	2	3	4	1	3	3	2	2	2	3	3	3	3	4	3	2	3
1931	1	12	1	Kunming	Yunda	5	5	5	5	5	5	4.75	4	4.75	5	4	3	4	4	4	5	3	5	5	4	3	4	5	3	1	5	2	5	5	5	5	5	4	3	3	5	5	3	5	5	5	5	4
1932	1	12	1	Kunming	Yunda	5	5	5	5	5	5	5	5	5	5	5	3	3	4	5	2	5	5	5	3	1	3	3	3	1	1	2	3	4	2	3	5	1	5	1	4	4	4	4	3	4	4	4
1933	0	12	0	Xishuangbanna	Zhongxin	5	5	5	5	5	5	5	4	4	3	5	4	5	4	5	2	5	5	4	5	3	5	5	3	2	3	2	5	3	2	2	5	1	3	4	4	4	3	3	2	2	3	2
1934	0	12	0	Xishuangbanna	Zhongxin	5	4	5	4	5	5	5	5	4	4	5	5	5	3	4	5	4	5	4	3	2	4	4	3	3	2	2	4	5	1	4	4	2	3	3	4	4.25	3	3	3	4	5	5
1935	0	12	0	Hangzhou	Nanshan	5	5	5	5	5	5	4	5	5	4	5	5	5	3	5	3	3	5	4	4	2	3	5	4	1	2	2	4	4	1	2	4	2	3	1	4	4	4	4	3	3	2	3
1936	0	12	0	Hangzhou	Nanshan	4	4	5	4	5	4	5	5	5	5	5	5	4	3	3	5	5	5	5	5	3	3	4	4	4	4	2	4	5	1	4	3	1	5	2	4	4	3	3	4	4	3	4
1937	0	12	0	Hangzhou	Nanshan	5	5	5	5	5	5	5	4	4	3	4	3	5	4	5	3	5	5	5	3	2	3	3	4	1	1	2	3	5	1	3	5	2	3	2	3	3	3	2	3	3	4	4
1938	0	12	0	Hangzhou	Nanshan	5	5	5	5	5	4	5	5	5	4	5	3	5	4	5	3	5	5	4	4	4	4	3	4	4	4	2	4	5	1	4	4	2	3	1	3	4	4	3	3	5	4	5
1939	0	12	0	Hangzhou	Nanshan	5	5	5	5	5	5	5	5	5	5	5	4	5	3	5	5	5	5	5	4	3	5	5	4	4	4	2	4	5	2	2	5	3	5	3	5	5	5	5	5	5	5	5
1940	0	12	0	Hangzhou	Nanshan	5	5	5	5	5	5	5	5	5	5	5	5	5	4	5	5	5	5	5	4	5	5	5	4	1	4	2	5	5	1	3	5	2	4	2	5	5	5	5	5	5	4	4
1941	1	12	1	Hangzhou	Cuiyuan	5	5	5	5	5	5	5	5	5	5	5	5	5	4	5	4	5	5	4	5	5	5	4	4	5	5	2	4	4	2	4	5	3	4	3	4	3	5	4	3	4	2	5
1942	1	12	0	Kunming	Zhugou	5	5	5	5	5	5	5	5	5	5	4	4	5	4	4	4	4	5	4	1	4	4	4	4	5	4	2	4	2	4	3	5	4	4	2	2	4	2	2.5	2.5	4	2	4
1943	1	12	0	Kunming	Zhugou	5	5	5	4.5	4	5	4	4	4	4	5	3.25	4	4	5	4	4	5	5	3	2	4	3	4	2	4	2	4	3	3	2	3	3	4	1	3	2	4	4	1	5	4	5
1944	0	12	1	Kunming	Lianhua	5	5	5	5	5	5	5	5	5	5	5	5	5	5	5	4	5	5	3	5	3	5	4	4	1	2	2	5	3.5	3.5	3	5	1	5	1	5	5	5	5	5	5	4	5
1945	0	12	1	Kunming	Yunda	5	5	5	5	5	5	5	5	5	4	5	2	5	5	5	5	5	5	5	3	3	3	4	4	3	3	2	5	2	1	5	4	1	5	1	5	5	5	5	5	5	4	5
1946	1	12	1	Kunming	Lianhua	5	5	5	5	5	5	5	5	5	5	5	3	5	3	4	2	5	5	4	5	2	5	5	4	4	5	2	5	5	2	5	5	3	5	1	5	5	5	5	5	5	3	4
1947	1	12	1	Kunming	Wuhua	4	5	5	5	5	5	4	4	5	5	5	5	5	3	4	5	3	5	3.75	2	2	4	4	4	2	2	2	5	5	5	4	3	1	3	1	4	2	2	2	2	4	3	3
1948	1	12	1	Kunming	Wuhua	4	5	5	5	4	5	5	5	5	4	5	4	5	3	5	4	5	5	5	4.5	3.75	3	3	4	1	1	2	4	5	2	2	5	2	2	3	4	4	4	4	3	3	4	4
1949	1	12	1	Kunming	Yunda	4	5	5	4	5	4	5	4	3	4	5	5	3	3	5	5	4	5	5	3	1	4	5	4	3	1	2	5	4	4	3	4	3	5	2	3	3	3	3	5	4	4	5
1950	1	12	0	Xishuangbanna	Zhongxin	4	5	5	5	5	5	5	4	5	4	3	3	3	3	4	4	3	5	4	2	4	3	3	4	2	2	2	5	3	2	4	5	2	5	3	5	5	4	2	4	5	5	3
1951	0	12	0	Hangzhou	Nanshan	5	5	5	5	5	5	5	5	5	5	5	4	5	4	5	5	5	5	5	2	1	5	4	5	3	3	2	5	5	5	5	5	2	5	1	5	5	5	4	5	5	5	5
1952	0	12	0	Hangzhou	Nanshan	5	5	5	5	5	5	5	5	5	5	5	5	5	5	5	5	5	5	5	4	3	3	5	5	3	3	2	5	5	1	3	5	2	5	1	5	5	5	5	5	5	5	5
1953	0	12	0	Hangzhou	Nanshan	5	5	5	5	5	5	5	5	5	5	5	4	5	5	5	5	5	5	5	3	5	5	4	5	1	3	2	5	5	1	4	5	5	5	5	5	3	5	2	5	5	5	4
1954	0	12	1	Hangzhou	Fenghuang	5	5	5	5	5	5	5	5	5	5	5	3	5	3.25	4	3	4	5	4	5	1	5	2	5	1	1	2	3	4	3	2	5	1	4	4	3	2	3	1	3	5	2	3
1955	0	12	1	Hangzhou	Fenghuang	5	5	5	5	5	5	5	5	5	5	5	5	5	5	5	5	5	5	5	4	3	5	5	5	2	2	2	5	5	1	2	5	1	3	1	5	5	5	5	5	5	5	5
1956	1	12	1	Hangzhou	Shengli	5	5	5	5	5	5	5	5	5	5	3	3	4	5	4	4	4	5	5	3	5	5	5	5	1	3	2	3	5	2	4	3	1	5	3	5	5	5	5	5	5	5	5
1957	1	12	1	Hangzhou	Shengli	3	1	1	3	1	1	1	1	1	2	1	1	1	5	5	5	5	5	5	5	5	5	5	5	2	2	2	2	2	1	3	2	1	1	1	2	2	2	2	2	2	2	2
1958	0	12	0	Kunming	Erjie	5	5	5	5	4.75	5	4	5	4	4	4	4	5	5	4	5	4	5	4	3	4	5	5	5	4	4	2	5	3	1	3	4	2	5	1	5	5	5	5	5	3	4	3
1959	0	12	0	Kunming	Zhugou	5	5	5	4	5	5	5	5	5	5	5	4	4	4	4	5	5	5	5	5	5	5	5	5	5	5	2	2	2	2	4	2	2	2	2	4	4	3	3	3	3	2	2
1960	1	12	0	Kunming	Erjie	4	4	3	4	5	5	2	5	5	5	3	2	3	4	3	5	2	5	1	1	1	1	2	5	2	2	2	2	3	3	5	4	2	3	2	4	2	3	3	3	4	5	3
1961	1	12	0	Kunming	Zhugou	5	5	5	5	5	5	4	4	5	5	5	5	5	3	5	5	4	5	5	5	3	4	5	5	4	5	2	4	3	1	5	4	5	4	2	5	5	5	5	5	5	5	4
1962	0	12	1	Kunming	Yunda	5	5	5	5	5	5	5	5	5	5	5	5	5	5	5	4	5	5	5	5	5	5	5	5	2	2	2	5	5	1	5	5	1	5	1	5	5	5	5	5	5	5	5
1963	0	12	1	Kunming	Yunda	5	5	5	5	5	5	5	5	5	5	5	5	5	5	5	5	4	5	4	5	4	5	5	5	4	5	2	5	5	2	5	5	1	5	1	5	5	5	5	4	5	4	5
1964	1	12	1	Kunming	Wuhua	5	5	5	5	5	5	5	5	5	5	5	5	5	3	4	5	5	5	5	4	4	5	5	5	3	3	2	4	4	2	3	5	1	5	2	5	5	3	3	5	5	4	5
1965	1	12	1	Kunming	Yunda	4	5	5	5	4	4	5	4	4	5	4	5	5	4	5	3	3.5	5	5	5	4	5	5	5	4	5	2	5	3	2	5	5	3	5	2	5	5	5	5	5	5	5	5
1966	0	12	1	Xishuangbanna	Yixiao	5	5	5	5	5	5	5	5	5	5	5	5	5	3	5	5	5	5	5	5	3	5	5	5	5	5	2	4	2	1	3	5	1	3	2	1	1	1	1	4	4	5	5
1967	1	12	0	Kunming	Zhugou	3	4	4	5	5	4	4	3	3	4	2	3	4	2	3	2	4	2	1	1	3	2	4	2.5	2	4	2.25	2	1	1	1	2	1	3	1	1	1	3	3	3	3.75	2	2
1968	1	12	1	Kunming	Lianhua	5	5	5	5	5	3	5	3	5	5	5	5	5	2	3	1	1	1	1	2	1	1	1	1	1	1	3	2	2	2	4	2	1	5	2	1	1	1	1	5	5	1	3
1969	0	12	0	Xishuangbanna	Zhongxin	3	5	5	3	5	4	5	5	3	3	4	3	4	3	3	2	3	1	2	2	1	1	2	1	1	1	3	3	1	1	1.75	2	1	3	3	2	2	3	3	2	2	2	1
1970	1	12	0	Xishuangbanna	Erxiao	3	5	5	2	5	4	5	3	3	3	5	2	5	2	1	5	3	1	4	3	1	5	1	2	1	1	3	2	1	2	3	3	5	2	4	5	5	5	5	2	3	2	1
1971	1	12	1	Kunming	Wuhua	5	5	5	3	3	3	4	3	2	3	4	4	4	3	4	2	2	1	3	3	1	2	4	3	1	1	3	4	5	2	5	3	3	3	3	4.25	5	5	5	5	4	2	5
1972	1	12	1	Hangzhou	Cuiyuan	5	5	5	3	3	3	3	3	1	2	5	3	3	2	3	4	3	2	2	1	1	1	1	1	5	5	3	1	2	2	3	3	1	1	1	2	2	2	2	4	4	1	2
1973	0	12	1	Xishuangbanna	Shiji	5	5	5	5	4	4	4	5	5	4	5	5	3	3	3	1	4	2	3	2	3	4	3	1	1	1	3	3	2	1	3	4	3	3	2	2	2	2	2	2	3	2	4
1974	1	12	0	Kunming	Erjie	4	3	3	4	3	4	4	3	3	4	4	4	5	3	2	4	3	2	2	3	1	2	3	2	3	3	3	2	3	4	5	2	3	2	4	3	2	3	2	3	3	2	3
1975	1	12	0	Xishuangbanna	Changle	3	3	4	4	5	5	3	5	4	4	5	4	3	2	3	3	3	2	3	2	2	2	3	2	2	2	3	4	2	2	5	4	2	3	4	3	3	3	2	3	3	2	2
1976	1	12	1	Xishuangbanna	Shiji	5	5	3	5	5	4	4	5	3	4	3	1	2	3	2	3	1	2	2	3	1	3	1	2	1	1	3	2	1	1	4	4	1	2	3	3	5	1	1	4	2.5	2	3
1977	0	12	0	Hangzhou	Lijia	3	4	5	4	5	4	4	3	4	5	5	5	3	2	2	2	3	2	3	3	2	2	3	3	2	2	3	3	2	2	5	3	2	1	2	2	1	1	2	1	2	1	3
1978	0	12	0	Xishuangbanna	Changle	4	5	5	3	5	4	2	5	5	5	3	5	5	3	4	2	5	2	5	5	1	4	5	4	1	1	3	4	4	1	4	5	5	4	5	2	3	1	1	2	4	4	3
1979	1	12	0	Hangzhou	Nanshan	4	4	4	4	4	4	4	4	4	4	4	4	5	3	4	3	4	3	4	2.75	1	3	3	1	1	3	3	3	4	1.25	1	3	1	3	2	3	2	2	2	4	3	3	2
1980	0	12	0	Xishuangbanna	Erxiao	4	3	4	4	5	5	4	4	3	4	3	5	4	2	3	2	2	3	3	2	1	1	2	1	2	2	3	2	1	2	1	2	1	2	2	1	1	1	2	2	2	3	2
1981	1	12	0	Xishuangbanna	Erxiao	5	5	5	5	5	4	4	4.75	2	2	5	2	5	1	3	3	3	3	4	3	3	2	1	1	2	2	3	3	1	3	2	1	3	1	1	1	1	1	1	1	1	1	1
1982	1	12	0	Hangzhou	Nanshan	5	5	4	5	3	4	5	4	3	3	3	5	3	4	3	2	2	3	3	4	4	2	2	2	1	1	3	3	3	3	2	1	3	3	2	3	3	3	3	2	3	1	2
1983	1	12	0	Kunming	Erjie	5	5	5	4	5	5	4.5	4	3	3	5	5	4	3	4	4	5	3	4	4	5	4	3	2	1	1	3	2	3	3	5	4	4	2	1	3	4	5	2	5	4	4	4
1984	1	12	0	Kunming	Erjie	5	5	5	5	5	4	4	5	3	5	4	5	5	3	4	4	5	3	3.75	5	5	4	3	2	3	3	3	5	5	2	5	4	3	5	1	3	4	5	3	5	5	4	5
1985	0	12	1	Kunming	Lianhua	4	5	5	5	5	3	5	3	3	2	5	4	5	3	2	3	2	3	5	2.5	2	2	3	2	1	2	3	4	5	2	1	3	1	1	1	1	1	1	3	2	2	3	2
1986	0	12	0	Xishuangbanna	Erxiao	5	5	5	4	5	4	4	4	4	4	5	4	4	3	4	4	5	3	4	3	3	4	4	2	1	3	3	4	3	4	1	4	3	3	3	3	3	2	4	2	3	4	3
1987	1	12	0	Xishuangbanna	Changle	1	1	5	5	1	2	4	2	3	5	2	4	5	1	3	4	2	3	4.25	3	1	4	3.25	2	3	3	3	2	1	4	1	2	3	1	2	2	4.25	3	3.25	4	1	2	2
1988	1	12	0	Xishuangbanna	Changle	3	3	3	3	4	3	2	4	4	4	5	4	4	3	4	2	2	3	4	2	1	1	3	2	2	2	3	2	2	1	3	4	2	2	3	4	4	4	4	3	2	3	2
1989	1	12	0	Xishuangbanna	Zhongxin	4	5	5	3	5	5	5	5	4	4	4	4	3	2	4	2	2	3	3	3	1	5	3	2	1	1	3	5	4	5	1	4	3	4	2	3	3	3	3	4	5	4	5
1990	1	12	1	Xishuangbanna	Yixiao	5	5	5	5	3	5	5	5	3	5	5	3	3	3	5	3	3	3	4	3	1	5	1	2	1	5	3	3	3	3	5	3	3	3	3	3	3	3	3	3	3	3	3
1991	1	12	1	Hangzhou	Shengli	3	3	3	3	3	3	3	3	3	3	3	3	3	3	3	3	3	3	3	3	3	3	3	3	3	3	3	3	3	3	4	3	3	3	3	3	3	3	3	3	3	3	3
1992	1	12	0	Kunming	Zhugou	4	5	5	5	4	4	4	4	5	5	4	4	5	2	3	4	5	3	5	2	2	4	1	3	2	4	3	5	4	2	5	4	3	5	1	3.75	2	4	3.5	3	5	2	4
1993	1	12	1	Kunming	Lianhua	5	5	5	3	3	3	4	4	3	3	3	4	3	2	3	2	3	3	3	2	2	2	3	3	3	3	3	3	3	3	3	3	3	3	3	3	3	3	3	3	3	3	2
1994	1	12	1	Kunming	Yunda	4	5	4	1	2	3	5	3	4	3	4	3	2	3	3	3	3	3	3	3	3	3	3	3	3	3	3	3	4	5	2	3	1	3	3	3	3	3	3	3	3	3	3
1995	0	12	0	Kunming	Zhugou	4	5	5	5	5	5	4	5	5	4	5	5	5	3	4	5	4	3	5	5	3	4	4	5	5	4	3	4	4	3	3	5	5	5	3	5	4	2	3	4	5	5	4
1996	0	12	0	Hangzhou	Nanshan	5	5	5	4	5	5	4	4	5	5	5	4	4	3	4	2	4	4	3	3	2	4	4	1	1	1	3	4	4	1	2	5	4	5	2	1	1	1	1	4	2	3	3
1997	0	12	0	Xishuangbanna	Zhongxin	5	5	5	4	5	5	5	4	3	4	5	3	5	3	3	2	2	4	5	3	1	4	2	1	1	2	3	2	4	1	1	3	2	3	4	4	3	4	2	2	4	3	2
1998	0	12	0	Xishuangbanna	Erxiao	4	4	5	3	4	3	3	3	2	5	3	3	3	3	2	1	1	4	4	3	3	2	1	1	1	1	3	2	1	1	1	1	2	2	2	1	1	1	1	2	4	1	3
1999	1	12	0	Xishuangbanna	Changle	3	5	5	5	5	4	4	4	5	5	4	2	3	3	4	2	3	4	3	4	1	3	2	1	1	1	3	4	1	1	4	3	3	2	3	1	3	3	1	2	2	3	2
[truncated: 176 more rows]
