# Supplementary material for: Direct, indirect, and vicarious nature experiences collectively predict preadolescents’ self-reported nature connectedness and conservation behaviors
Source: PeerJ. 2023 Jun 21;11:e15542. doi: 10.7717/peerj.15542 (PMC10290449; doi:10.7717/peerj.15542)
Supplement: Supplemental Information 4 [file peerj-11-15542-s004.xlsx]

## Sheet: Sheet1
Nature experiences	frequence
Read nature books	31
Catch fish and shrimp	30
Pick fruit	17
Computer browser search	16
Travel to natural scenic spots	15
Planting flowers and trees	15
Observe insects	12
Watch cartoons	11
Watch nature documentaries	11
Catching fish and shrimp	11
Parents' natural experience	9
Catch animals	9
Picnic	7
Observe insects	7
Take a walk	7
Watch TV	6
Watch movie	6
Electronic games	6
Swimming in river	6
Climbing mountain	6
Visit the zoo	5
Visit the Botanical Garden	5
Photo record	5
Camping	5
Swing	4
Stargazing	4
Visit the aquarium	3
Elder‘s story	3
Teacher tells	3
Visit the Natural History Museum	3
Fly a kite	3
House building game	3
Lying on the grass	3
Play in mud	3
Catching butterfly	3
Watch the news	2
Short Video APP	2
Skiing	2
Collect shells	2
Collect stones	2
Collect leaves	2
Explore the forest	2
Dig out eggs	2
Make a snowman	1
Rubber tapping	1
Boating	1
Firewood	1
Climbing a tree	1
Tea picking	1
Picking mushrooms	1
Play tennis	1
